# Supplementary material for: Probing PAC1 receptor activation across species with an engineered sensor
Source: eLife. 2024 Aug 15;13:RP96496. doi: 10.7554/eLife.96496 (PMC11326774; doi:10.7554/eLife.96496)
Supplement: Figure 1—source data 1. [file elife-96496-fig1-data1.xlsx]

## Sheet: e
wavelength	wPACAP	woPACAP	spectrum	replicate
300	1031.94	589.944	Excitation	3
302	940.564	95.1246	Excitation	3
304	762.626	289.845	Excitation	3
306	664.109	23.9598	Excitation	3
308	192.808	591.794	Excitation	3
310	227.344	-73.8114	Excitation	3
312	153.058	36.3369	Excitation	3
314	132.264	235.041	Excitation	3
316	171.51	72.3865	Excitation	3
318	173.703	105.108	Excitation	3
320	-127.606	93.0096	Excitation	3
322	213.071	141.306	Excitation	3
324	164.645	63.7	Excitation	3
326	-91.9643	-76.905	Excitation	3
328	-285.752	-128.101	Excitation	3
330	-135.889	74.2768	Excitation	3
332	-243.05	92.917	Excitation	3
334	-394.275	367.31	Excitation	3
336	-304.195	-92.7041	Excitation	3
338	-495.352	566.427	Excitation	3
340	-346.718	172.264	Excitation	3
342	-473.178	293.985	Excitation	3
344	-384.878	12.2657	Excitation	3
346	-368.856	464.052	Excitation	3
348	-541.4	482.265	Excitation	3
350	-289.347	91.6447	Excitation	3
352	-68.3624	606.956	Excitation	3
354	-39.3553	278.252	Excitation	3
356	-32.6294	789.137	Excitation	3
358	277.399	845.381	Excitation	3
360	-101.123	877.184	Excitation	3
362	166.953	1062.73	Excitation	3
364	228.508	1386.59	Excitation	3
366	386.9	1930.45	Excitation	3
368	500.447	1775.78	Excitation	3
370	612.942	2315.43	Excitation	3
372	693.259	2306.23	Excitation	3
374	1136.8	2587.28	Excitation	3
376	1201.59	2719.36	Excitation	3
378	1269.97	3193.2	Excitation	3
380	1685.92	3093.23	Excitation	3
382	1766.56	3779.62	Excitation	3
384	1991.99	3853.93	Excitation	3
386	2557.51	4253.44	Excitation	3
388	2318.72	4267.78	Excitation	3
390	2535.72	4349.89	Excitation	3
392	2560.58	4656.44	Excitation	3
394	2725.18	5022.07	Excitation	3
396	2987.34	4923.61	Excitation	3
398	3067.85	5024.07	Excitation	3
400	3269.19	5130.37	Excitation	3
402	3216.07	4978.37	Excitation	3
404	3152.63	4887.17	Excitation	3
406	3301.38	5002.15	Excitation	3
408	3361.53	4656.73	Excitation	3
410	3434.49	4755.89	Excitation	3
412	3645.44	4649.57	Excitation	3
414	3672.07	4723.6	Excitation	3
416	4020.1	4331.66	Excitation	3
418	3933.23	3893.21	Excitation	3
420	3835.7	3987.48	Excitation	3
422	3995.01	3591.91	Excitation	3
424	4041.48	3620.68	Excitation	3
426	4185.27	3268.21	Excitation	3
428	4405.48	3232.17	Excitation	3
430	4766.98	2730.89	Excitation	3
432	5146.59	2447.99	Excitation	3
434	5613.15	2107.78	Excitation	3
436	5889.65	1834.32	Excitation	3
438	6162.19	1647.19	Excitation	3
440	6737.38	1413.09	Excitation	3
442	7495.98	1601.57	Excitation	3
444	7591.22	1382.09	Excitation	3
446	8495.56	1325.78	Excitation	3
448	9194.65	1139.49	Excitation	3
450	9461.03	1084.75	Excitation	3
452	11247.9	1144.54	Excitation	3
454	12365.1	1178.76	Excitation	3
456	12776.4	1086.4	Excitation	3
458	13497.5	1355.89	Excitation	3
460	15017.3	1488.96	Excitation	3
462	16007.3	1655.6	Excitation	3
464	16729.3	1881.12	Excitation	3
466	18187.8	1739.3	Excitation	3
468	19588.8	2328.04	Excitation	3
470	19701	2734.2	Excitation	3
472	21110.3	2829.81	Excitation	3
474	22485.2	2523.77	Excitation	3
476	24077.8	3158.54	Excitation	3
478	27007.8	3445.15	Excitation	3
480	27434	3377.38	Excitation	3
482	27175.2	3504.58	Excitation	3
484	28914.7	3770.33	Excitation	3
486	29912.5	3727.43	Excitation	3
488	31105.7	3940.46	Excitation	3
490	34013.7	4254.25	Excitation	3
492	35604.8	4535.84	Excitation	3
494	36557.1	5079.4	Excitation	3
496	36015.7	4966.69	Excitation	3
498	37400.3	5498.32	Excitation	3
500	34389.1	5630.82	Excitation	3
502	31995.8	5669.46	Excitation	3
504	30508.6	6222.23	Excitation	3
506	25320.9	5685.67	Excitation	3
508	21808.7	5585.61	Excitation	3
510	17893.1	5413.56	Excitation	3
512	13980.4	4633.39	Excitation	3
514	10633	4177.76	Excitation	3
516	8067.04	3447.26	Excitation	3
518	5728.96	2634.07	Excitation	3
520	3957.93	2310.34	Excitation	3
300	675.256	312.321	Excitation	4
302	825.405	398.194	Excitation	4
304	811.55	166.279	Excitation	4
306	1253.84	-90.3942	Excitation	4
308	404.691	606.296	Excitation	4
310	362.691	382.056	Excitation	4
312	-63.4534	164.637	Excitation	4
314	362.69	-101.563	Excitation	4
316	190.83	91.6575	Excitation	4
318	73.2563	14.9462	Excitation	4
320	-267.891	338.867	Excitation	4
322	247.254	192.029	Excitation	4
324	143.396	122.308	Excitation	4
326	-152.466	-150.21	Excitation	4
328	-238.184	-164.127	Excitation	4
330	-43.6134	0.86622	Excitation	4
332	-299.046	23.5642	Excitation	4
334	-370.476	349.88	Excitation	4
336	-365.476	22.5205	Excitation	4
338	-270.623	-4.10868	Excitation	4
340	-191.768	-67.2901	Excitation	4
342	-355.483	294.277	Excitation	4
344	-90.7687	5.39456	Excitation	4
346	-547.06	100.267	Excitation	4
348	-412.061	653.913	Excitation	4
350	-146.348	58.3508	Excitation	4
352	-38.9187	266.595	Excitation	4
354	-93.3492	315.276	Excitation	4
356	-12.2077	699.19	Excitation	4
358	270.943	664.202	Excitation	4
360	78.0824	1087.56	Excitation	4
362	216.367	1116.18	Excitation	4
364	292.653	1261.37	Excitation	4
366	539.654	1912.3	Excitation	4
368	801.508	1955.48	Excitation	4
370	1012.51	2345.02	Excitation	4
372	993.229	2495.42	Excitation	4
374	1333.81	2515.79	Excitation	4
376	1197.38	2532.62	Excitation	4
378	1530.53	3022.28	Excitation	4
380	1874.53	3301.6	Excitation	4
382	2145.53	3456.44	Excitation	4
384	2291.68	3746.44	Excitation	4
386	2541.97	3914.08	Excitation	4
388	2604.68	4332.9	Excitation	4
390	3078.97	4412.78	Excitation	4
392	2758.83	4126.2	Excitation	4
394	3143.69	4605.97	Excitation	4
396	3088.69	4958.39	Excitation	4
398	3262.55	5248.25	Excitation	4
400	3584.69	4886.73	Excitation	4
402	3550.26	5011	Excitation	4
404	3362.84	5366.6	Excitation	4
406	3396.26	4760.32	Excitation	4
408	3666.26	4663.75	Excitation	4
410	3769.41	5081.89	Excitation	4
412	3545.26	4602.85	Excitation	4
414	3713.83	4305.38	Excitation	4
416	3865.69	4323.41	Excitation	4
418	3876.83	4090.06	Excitation	4
420	3829.69	3950.77	Excitation	4
422	4047.12	3454.1	Excitation	4
424	3937.69	3530.17	Excitation	4
426	4178.54	3385.54	Excitation	4
428	4589.97	3118.01	Excitation	4
430	4464.4	2896.54	Excitation	4
432	4841.4	2317.82	Excitation	4
434	5282.97	2258.66	Excitation	4
436	5506.4	1856.07	Excitation	4
438	5946.11	1392.7	Excitation	4
440	6547.25	1592.62	Excitation	4
442	6564.68	1256.49	Excitation	4
444	7209.97	1226.14	Excitation	4
446	7862.11	1149.9	Excitation	4
448	8276.4	1005.66	Excitation	4
450	8741.11	962.607	Excitation	4
452	10323.5	951.961	Excitation	4
454	11050.3	1270.89	Excitation	4
456	11946.3	1180.63	Excitation	4
458	12975.3	1302.3	Excitation	4
460	14240.8	1486.4	Excitation	4
462	14768.8	1566.42	Excitation	4
464	15646	1614.62	Excitation	4
466	17127.3	1813.25	Excitation	4
468	18092.7	2310.66	Excitation	4
470	17710.4	2757.53	Excitation	4
472	19438.8	2746.77	Excitation	4
474	20685.3	2599.48	Excitation	4
476	23059.7	3261.51	Excitation	4
478	25309.4	3439.19	Excitation	4
480	26113	3198.33	Excitation	4
482	25294.7	3367.21	Excitation	4
484	27190	3609.03	Excitation	4
486	27329.7	3362.35	Excitation	4
488	28399.1	3831.88	Excitation	4
490	31050.4	4099.71	Excitation	4
492	32793.6	4558.91	Excitation	4
494	33857	4821.85	Excitation	4
496	33029.1	4703.33	Excitation	4
498	34761.8	5360.82	Excitation	4
500	31896.4	5684.5	Excitation	4
502	30102.7	5229.71	Excitation	4
504	27699.3	5717.82	Excitation	4
506	24426.7	5293.67	Excitation	4
508	20090	5368.13	Excitation	4
510	17215.1	4958.11	Excitation	4
512	13114.9	4764.24	Excitation	4
514	10306.7	3841.27	Excitation	4
516	7828.71	3150.67	Excitation	4
518	5308.43	2561.27	Excitation	4
520	4037.57	2101.74	Excitation	4
510	23970.6	2959.87	Emission	3
512	24712.3	2980.72	Emission	3
514	24765.4	3222	Emission	3
516	24241.8	3341.86	Emission	3
518	23542.6	3253	Emission	3
520	22703.5	3309.4	Emission	3
522	21394.8	3112.3	Emission	3
524	20088.5	3046.4	Emission	3
526	18431.7	2804.31	Emission	3
528	17294	2560.68	Emission	3
530	15940.1	2451.17	Emission	3
532	14865.8	2264.99	Emission	3
534	13532.5	1998.25	Emission	3
536	12538.8	1789.87	Emission	3
538	11884.5	1714.18	Emission	3
540	11312.7	1474.82	Emission	3
542	10827.7	1546.41	Emission	3
544	10025.3	1396.89	Emission	3
546	9690.69	1357.23	Emission	3
548	9070.11	1168.89	Emission	3
550	8628.82	1296.46	Emission	3
552	8146.95	1175.67	Emission	3
554	7739.92	1071.13	Emission	3
556	7023.27	1004.1	Emission	3
558	6772	1056.44	Emission	3
560	6103.79	855.132	Emission	3
562	5625.33	847.017	Emission	3
564	4967.04	801.575	Emission	3
566	4555.96	755.395	Emission	3
568	4236.84	654.493	Emission	3
570	3871.42	671.821	Emission	3
572	3620.62	643.182	Emission	3
574	3351.19	535.493	Emission	3
576	3053.33	495.034	Emission	3
578	2644.42	377.346	Emission	3
580	2481.92	420.083	Emission	3
582	2286.63	374.592	Emission	3
584	2186.11	368.362	Emission	3
586	2056.63	313.002	Emission	3
588	1865.83	277.215	Emission	3
590	1661.99	240.018	Emission	3
592	1656.06	268.739	Emission	3
594	1554.95	266.247	Emission	3
596	1337.3	200.739	Emission	3
598	1265.82	241.985	Emission	3
600	1215.59	211.427	Emission	3
602	1115.57	199.017	Emission	3
604	1081.21	168.854	Emission	3
606	880.767	141.722	Emission	3
608	929.752	203.394	Emission	3
610	810.927	133.542	Emission	3
612	773.311	159.378	Emission	3
614	686.555	160.87	Emission	3
616	619.532	84.6567	Emission	3
618	608.053	146.771	Emission	3
620	526.517	131.001	Emission	3
622	512.695	137.624	Emission	3
624	516.311	132.886	Emission	3
626	419.475	145.394	Emission	3
628	359.113	117.017	Emission	3
630	353.961	139.148	Emission	3
632	375.6	78.4106	Emission	3
634	335.193	121.542	Emission	3
636	343.821	110.755	Emission	3
638	304.425	69.6236	Emission	3
640	234.251	41.6727	Emission	3
642	314.505	92.5251	Emission	3
644	203.216	67.3613	Emission	3
646	215.087	78.0989	Emission	3
648	216.353	71.9185	Emission	3
650	177.471	75.6234	Emission	3
652	179.528	51.2791	Emission	3
654	161.585	62.689	Emission	3
656	155.692	77.4758	Emission	3
658	142.935	43.4758	Emission	3
660	118.562	29.7053	Emission	3
662	149.62	45.1972	Emission	3
664	108.433	43.7053	Emission	3
666	148.445	65.9511	Emission	3
668	105.794	20.902	Emission	3
670	75.2127	27.1806	Emission	3
672	106.806	35.8692	Emission	3
674	90.2584	32.1806	Emission	3
676	84.2812	37.115	Emission	3
678	46.0378	32.115	Emission	3
680	61.4789	18.5249	Emission	3
682	62.3155	50.1969	Emission	3
684	64.7109	33.3117	Emission	3
686	53.6881	39.3445	Emission	3
688	53.5132	15.2297	Emission	3
690	80.5132	20.5903	Emission	3
692	59.3269	20.9346	Emission	3
694	54.768	-8.96694	Emission	3
696	45.6995	30.1641	Emission	3
698	29.4561	21.6394	Emission	3
700	50.1406	18.5575	Emission	3
702	39.1406	10.8198	Emission	3
704	46.7566	16.0493	Emission	3
706	17.536	7.24604	Emission	3
708	40.3269	14.328	Emission	3
710	41.5703	9.67225	Emission	3
712	26.5475	12.2952	Emission	3
714	39.5475	-7.03259	Emission	3
716	8.93147	11.6394	Emission	3
718	14.3497	13.8361	Emission	3
720	29.3726	0.360801	Emission	3
722	5.93147	-5.78678	Emission	3
724	10.3612	26.9181	Emission	3
726	26.5703	12.3771	Emission	3
728	17.4069	-9.36057	Emission	3
730	26.7794	10.9181	Emission	3
732	2.95431	24.8033	Emission	3
734	20.5703	14	Emission	3
736	23.768	19.459	Emission	3
738	6.79086	-2.73766	Emission	3
740	9.96574	10.9181	Emission	3
742	11.5931	11.4919	Emission	3
744	4.77944	-7.70484	Emission	3
746	9.77944	15.9181	Emission	3
748	5.98858	7	Emission	3
750	8.60457	6.91806	Emission	3
510	18347.7	3057.31	Emission	4
512	18836.4	3052.94	Emission	4
514	18912.9	3326.89	Emission	4
516	18776.1	3272.27	Emission	4
518	18244.3	3329.37	Emission	4
520	17334.7	3361.93	Emission	4
522	16749.1	3185.85	Emission	4
524	15539.7	3019.93	Emission	4
526	14033	2729.09	Emission	4
528	13348.3	2506.12	Emission	4
530	12352.1	2444.99	Emission	4
532	11484.4	2203.36	Emission	4
534	10342.7	1981.31	Emission	4
536	9859.42	1761.28	Emission	4
538	9193.42	1716.76	Emission	4
540	8594.42	1557.26	Emission	4
542	8265.99	1506.45	Emission	4
544	7534.99	1410.56	Emission	4
546	7291.14	1342.58	Emission	4
548	7024.99	1179.08	Emission	4
550	6549.57	1228.27	Emission	4
552	6127.42	1149.43	Emission	4
554	5883.85	1113.54	Emission	4
556	5454	953.523	Emission	4
558	5235.85	1042.78	Emission	4
560	4703.42	895.296	Emission	4
562	4254.14	859.729	Emission	4
564	4027.71	897.392	Emission	4
566	3573.71	779.001	Emission	4
568	3200.28	624.32	Emission	4
570	2975.43	620.812	Emission	4
572	2775.57	559.836	Emission	4
574	2538.71	560.561	Emission	4
576	2311.42	536.217	Emission	4
578	2037	388.942	Emission	4
580	1861.85	423.757	Emission	4
582	1690.14	375.88	Emission	4
584	1629.71	379.709	Emission	4
586	1592.14	308.685	Emission	4
588	1421.28	263.85	Emission	4
590	1340.57	243.451	Emission	4
592	1192.28	233.499	Emission	4
594	1121.43	252.382	Emission	4
596	1016.57	178.499	Emission	4
598	977.997	172.437	Emission	4
600	957.997	215.774	Emission	4
602	813.426	196.97	Emission	4
604	773.997	153.344	Emission	4
606	608.568	165.251	Emission	4
608	671.998	141.76	Emission	4
610	636.569	138.619	Emission	4
612	564.569	118.994	Emission	4
614	522.855	186.87	Emission	4
616	483.283	88.7049	Emission	4
618	470.713	162.55	Emission	4
620	390.713	118.722	Emission	4
622	401.569	124.932	Emission	4
624	400.569	98.8767	Emission	4
626	310.855	110.76	Emission	4
628	307.426	82.7289	Emission	4
630	303.426	74.5811	Emission	4
632	261.998	80.5262	Emission	4
634	261.427	81.3783	Emission	4
636	265.712	129.543	Emission	4
638	219.427	109.691	Emission	4
640	203.855	86.2305	Emission	4
642	231.427	52.3714	Emission	4
644	129.998	52.746	Emission	4
646	161.57	45.801	Emission	4
648	157.427	72.1686	Emission	4
650	149.57	94.4504	Emission	4
652	119.999	73.1926	Emission	4
654	164.428	73.9968	Emission	4
656	104.284	50.5913	Emission	4
658	116.57	65.5913	Emission	4
660	67.856	30.7631	Emission	4
662	113.285	18.8799	Emission	4
664	87.4278	52.7631	Emission	4
666	132.714	36.7012	Emission	4
668	67.8562	0.16169	Emission	4
670	64.7134	41.873	Emission	4
672	76.1419	36.3885	Emission	4
674	83.8565	13.873	Emission	4
676	71.428	32.3266	Emission	4
678	35.1421	16.3266	Emission	4
680	41.5708	14.1307	Emission	4
682	56.2853	4.63928	Emission	4
684	61.571	24.7252	Emission	4
686	53.9995	3.4984	Emission	4
688	63.4282	8.41249	Emission	4
690	61.4282	35.4365	Emission	4
692	32.5711	25.6942	Emission	4
694	75.9998	7.01388	Emission	4
696	41.2852	28.8661	Emission	4
698	25.9993	26.976	Emission	4
700	51.714	40.6633	Emission	4
702	58.714	6.60833	Emission	4
704	40.7141	1.78015	Emission	4
706	37.9997	30.1788	Emission	4
708	7.57108	12.4915	Emission	4
710	42.857	8.7492	Emission	4
712	26.2855	29.7183	Emission	4
714	16.2855	3.46745	Emission	4
716	26.2854	36.976	Emission	4
718	34.1426	26.3746	Emission	4
720	26.7142	20.2647	Emission	4
722	29.2854	-1.59445	Emission	4
724	12.4284	15.6873	Emission	4
726	13.857	4.03095	Emission	4
728	46.5715	4.97599	Emission	4
730	15.2856	8.6873	Emission	4
732	9.85692	13.6014	Emission	4
734	18.857	12	Emission	4
736	0.999846	6.34365	Emission	4
738	14.5714	2.94504	Emission	4
740	28.1427	10.6873	Emission	4
742	21.4285	13.1169	Emission	4
744	19.2856	8.71825	Emission	4
746	11.2856	8.6873	Emission	4
748	11.7142	14	Emission	4
750	26.7143	9.6873	Emission	4
300	1069.66	492.322	Excitation	1
302	562.801	420.5	Excitation	1
304	602.695	282.109	Excitation	1
306	613.356	289.639	Excitation	1
308	581.213	544.083	Excitation	1
310	490.186	992.721	Excitation	1
312	695.142	542.474	Excitation	1
314	246.901	-269.074	Excitation	1
316	532.434	150.431	Excitation	1
318	358.945	399.445	Excitation	1
320	206.716	288.459	Excitation	1
322	43.262	-53.4922	Excitation	1
324	-53.2148	30.7854	Excitation	1
326	-92.3816	-110.106	Excitation	1
328	102.334	132.813	Excitation	1
330	8.71833	191.287	Excitation	1
332	-281.074	-34.9609	Excitation	1
334	-183.358	142.099	Excitation	1
336	61.2164	-249.164	Excitation	1
338	-59.8977	-32.4134	Excitation	1
340	43.1456	-65.3293	Excitation	1
342	-305.464	248.61	Excitation	1
344	-65.9913	-223.075	Excitation	1
346	-235.651	-22.2101	Excitation	1
348	-192.489	68.8481	Excitation	1
350	-289.801	514.078	Excitation	1
352	240.693	274.266	Excitation	1
354	-12.2274	655.24	Excitation	1
356	328.714	604.634	Excitation	1
358	329.002	914.688	Excitation	1
360	597.662	997.744	Excitation	1
362	643.337	958.066	Excitation	1
364	749.369	1061.44	Excitation	1
366	843.789	1585.21	Excitation	1
368	1068.26	1587.79	Excitation	1
370	1351.94	1989.84	Excitation	1
372	1586.37	2263.88	Excitation	1
374	1697.59	2712.4	Excitation	1
376	1906.37	2677.28	Excitation	1
378	1887.62	2808.85	Excitation	1
380	2088.27	3015.65	Excitation	1
382	2201.67	3372.89	Excitation	1
384	2258.73	3553.04	Excitation	1
386	2443.81	3803.15	Excitation	1
388	2668.51	3821.2	Excitation	1
390	2619.32	4068.98	Excitation	1
392	2976.16	4156.37	Excitation	1
394	2801.97	4299.17	Excitation	1
396	3029.06	4350.1	Excitation	1
398	2972.07	4675.17	Excitation	1
400	3014.57	4539.82	Excitation	1
402	3318	4800.13	Excitation	1
404	3567.38	4353.15	Excitation	1
406	3585.28	4576.91	Excitation	1
408	3278.02	4398.31	Excitation	1
410	3525.37	4385.12	Excitation	1
412	3584.56	4463.61	Excitation	1
414	3940.45	4514.55	Excitation	1
416	4272.86	4064.89	Excitation	1
418	4043.68	4140.37	Excitation	1
420	3899.86	3816.5	Excitation	1
422	4154.11	3458.44	Excitation	1
424	4073.02	3111.99	Excitation	1
426	4198.91	3217.07	Excitation	1
428	4639.63	3354.59	Excitation	1
430	4791.67	3058.01	Excitation	1
432	5188.59	2667.04	Excitation	1
434	5460.42	2489.61	Excitation	1
436	5871.91	2212.95	Excitation	1
438	6097	1831.03	Excitation	1
440	6478.72	1835.37	Excitation	1
442	6903.45	1758.12	Excitation	1
444	7355.75	1696.52	Excitation	1
446	8161.24	1690.18	Excitation	1
448	8551.71	1541.06	Excitation	1
450	8950.19	1353.11	Excitation	1
452	9672.74	1720.77	Excitation	1
454	10766.3	1505.63	Excitation	1
456	11829.6	1644.52	Excitation	1
458	12583.7	1658.4	Excitation	1
460	12962.6	1828.16	Excitation	1
462	13865.4	1619.12	Excitation	1
464	14529.2	1724.11	Excitation	1
466	16354	1793.12	Excitation	1
468	16623.2	1642.01	Excitation	1
470	17525.8	1966.55	Excitation	1
472	18547.1	1933.22	Excitation	1
474	19365.6	2278.51	Excitation	1
476	21332.3	2719	Excitation	1
478	23420.1	3088.82	Excitation	1
480	23610	3347.51	Excitation	1
482	24217.4	3221.53	Excitation	1
484	25160	3687.67	Excitation	1
486	25788.6	3638.1	Excitation	1
488	27031.2	3688.4	Excitation	1
490	29365.7	3996.77	Excitation	1
492	30266.5	4010.16	Excitation	1
494	31709.5	4575.21	Excitation	1
496	31223.6	4238.63	Excitation	1
498	32239.9	4749.52	Excitation	1
500	29575	4693.5	Excitation	1
502	27871.4	4823.3	Excitation	1
504	25623	4900.8	Excitation	1
506	22447.8	4926.71	Excitation	1
508	19051.7	4620.57	Excitation	1
510	15626.4	4576.2	Excitation	1
512	12427.5	3968.66	Excitation	1
514	9253.81	3557.75	Excitation	1
516	6605.42	2637.88	Excitation	1
518	5074.77	2188.77	Excitation	1
520	3604.62	1972.79	Excitation	1
300	541.48	277.494	Excitation	2
302	649.125	239.228	Excitation	2
304	569.285	-108.675	Excitation	2
306	897.762	-261.724	Excitation	2
308	479.117	348.786	Excitation	2
310	444.192	686.148	Excitation	2
312	616.365	318.39	Excitation	2
314	360.044	-81.5063	Excitation	2
316	461.818	-15.4959	Excitation	2
318	379.013	95.4236	Excitation	2
320	219.674	87.6426	Excitation	2
322	-54.1848	34.5232	Excitation	2
324	54.8504	-2.38145	Excitation	2
326	-27.6173	-99.8988	Excitation	2
328	26.9516	67.757	Excitation	2
330	604.302	-66.3966	Excitation	2
332	-332.695	-143.155	Excitation	2
334	-4.12655	-250.553	Excitation	2
336	290.656	-395.831	Excitation	2
338	302.179	-328.488	Excitation	2
340	-217.711	-290.946	Excitation	2
342	-54.44	-172.147	Excitation	2
344	-19.2938	-445.192	Excitation	2
346	168.088	-338.742	Excitation	2
348	235.879	-179.739	Excitation	2
350	158.665	139.075	Excitation	2
352	84.6735	-31.9967	Excitation	2
354	378.589	415.464	Excitation	2
356	540.678	408.565	Excitation	2
358	514.927	521.771	Excitation	2
360	832.404	768.576	Excitation	2
362	830.106	901.755	Excitation	2
364	1026.09	759.616	Excitation	2
366	936.248	1527.03	Excitation	2
368	1151.25	1774.96	Excitation	2
370	1961.63	1933.57	Excitation	2
372	1108.71	2617.15	Excitation	2
374	1751.84	2453.39	Excitation	2
376	1990.08	2451.78	Excitation	2
378	2036.48	2779.92	Excitation	2
380	2459.02	3063.97	Excitation	2
382	2633.95	2929.9	Excitation	2
384	2683.76	3744.77	Excitation	2
386	3116.39	3899.58	Excitation	2
388	2965.88	3787.19	Excitation	2
390	2922.06	3982.9	Excitation	2
392	3143.27	4111.9	Excitation	2
394	3151.59	4287.55	Excitation	2
396	3047.35	4563.93	Excitation	2
398	3258.29	4861.65	Excitation	2
400	3376.3	4787.41	Excitation	2
402	3528.26	4867.79	Excitation	2
404	3752.44	4860.11	Excitation	2
406	3903.63	4549.88	Excitation	2
408	3755.2	4608.2	Excitation	2
410	3951.5	4341.37	Excitation	2
412	4000.14	4540.64	Excitation	2
414	4370.42	4771.34	Excitation	2
416	4540.65	4427.44	Excitation	2
418	4299	4231.81	Excitation	2
420	4344.65	3749.25	Excitation	2
422	4190.14	3425.13	Excitation	2
424	4662.34	3198.82	Excitation	2
426	4781.58	3444.87	Excitation	2
428	4923.21	3317.6	Excitation	2
430	5223.18	2891.76	Excitation	2
432	5819.34	2758.7	Excitation	2
434	6002.77	2482.44	Excitation	2
436	6391.78	2103.94	Excitation	2
438	6514.62	1937.98	Excitation	2
440	6867.29	1987.2	Excitation	2
442	7625.76	1792.35	Excitation	2
444	7636.13	1476.97	Excitation	2
446	8502.14	1608.45	Excitation	2
448	9134.23	1517.34	Excitation	2
450	9316.25	1439.73	Excitation	2
452	10699.2	1413.83	Excitation	2
454	12419.9	1515.06	Excitation	2
456	13077.3	1845.17	Excitation	2
458	13576.9	1840.87	Excitation	2
460	14653.2	1773.13	Excitation	2
462	15091.4	1807.87	Excitation	2
464	16350.5	1911.95	Excitation	2
466	17851.9	2248.78	Excitation	2
468	18720.3	2012.69	Excitation	2
470	19531	2242.17	Excitation	2
472	19900.5	2247.26	Excitation	2
474	21074.6	2712.08	Excitation	2
476	23128.2	3044.77	Excitation	2
478	26133.6	3438.24	Excitation	2
480	25834.9	3607.08	Excitation	2
482	26187.1	3134.62	Excitation	2
484	27654.7	3642.47	Excitation	2
486	28150.7	3756.76	Excitation	2
488	29389.4	3715.29	Excitation	2
490	32146.4	4117.56	Excitation	2
492	33615.7	4274.76	Excitation	2
494	34607.7	4604.24	Excitation	2
496	34610.4	4723.21	Excitation	2
498	34860.8	5093.5	Excitation	2
500	32678.4	5135.58	Excitation	2
502	30766.7	5026.81	Excitation	2
504	28072.3	5414.82	Excitation	2
506	24971.8	5329.86	Excitation	2
508	20677.9	5081.51	Excitation	2
510	17628.4	4656.25	Excitation	2
512	13196.2	4112.28	Excitation	2
514	10227.6	3570.34	Excitation	2
516	7295.3	2883.47	Excitation	2
518	5215.56	2491.08	Excitation	2
520	3866.85	1955.13	Excitation	2
510	16832.8	2469.74	Emission	1
512	17605.8	2551.03	Emission	1
514	17419.7	2784.05	Emission	1
516	17407.1	2793.85	Emission	1
518	16742.8	2840.79	Emission	1
520	15894.9	2824.58	Emission	1
522	15079.6	2597.74	Emission	1
524	14004.5	2676.79	Emission	1
526	12838	2339.45	Emission	1
528	12250	2254.63	Emission	1
530	11263.9	2154.02	Emission	1
532	10392.1	1942.37	Emission	1
534	9373.73	1699.04	Emission	1
536	9036.74	1601.47	Emission	1
538	8473.83	1460.84	Emission	1
540	7973.7	1431.3	Emission	1
542	7529.24	1294.04	Emission	1
544	7099.03	1131.25	Emission	1
546	6729.11	1214.94	Emission	1
548	6553.05	1087.52	Emission	1
550	5966.58	990.661	Emission	1
552	5654.73	873.35	Emission	1
554	5265.79	831.097	Emission	1
556	5007.84	834.165	Emission	1
558	4687.89	820.177	Emission	1
560	4116.76	711.257	Emission	1
562	3870.41	642.406	Emission	1
564	3533.81	549.234	Emission	1
566	3328.66	521.693	Emission	1
568	2893.72	613.107	Emission	1
570	2776.32	552.67	Emission	1
572	2507.55	516.131	Emission	1
574	2281.13	515.165	Emission	1
576	2145.79	554.867	Emission	1
578	1970.59	448.74	Emission	1
580	1839.52	413.407	Emission	1
582	1783.04	425.28	Emission	1
584	1560.37	348.637	Emission	1
586	1468.69	356.947	Emission	1
588	1404.86	314.9	Emission	1
590	1354.56	333.176	Emission	1
592	1236.74	295.521	Emission	1
594	1127.75	257.969	Emission	1
596	1075.55	257.636	Emission	1
598	959.638	250.475	Emission	1
600	911.058	235.957	Emission	1
602	808.688	189.417	Emission	1
604	805.419	183.486	Emission	1
606	677.629	166.405	Emission	1
608	683.135	228.922	Emission	1
610	656.902	184.163	Emission	1
612	604.26	122.75	Emission	1
614	583.496	151.496	Emission	1
616	486.127	203.531	Emission	1
618	502.275	152.175	Emission	1
620	412.866	116.151	Emission	1
622	406.124	130.095	Emission	1
624	457.508	188.52	Emission	1
626	400.322	166.29	Emission	1
628	318.582	180.243	Emission	1
630	306.36	113.002	Emission	1
632	318.695	109.439	Emission	1
634	327.127	100.036	Emission	1
636	236.917	106.841	Emission	1
638	295.325	83.8751	Emission	1
640	286.239	110.255	Emission	1
642	226.523	110.611	Emission	1
644	235.387	112.852	Emission	1
646	178.585	122.818	Emission	1
648	193.5	89.3808	Emission	1
650	183.216	103.737	Emission	1
652	158.893	114.748	Emission	1
654	134.426	92.7139	Emission	1
656	158.476	85.9551	Emission	1
658	152.896	94.6676	Emission	1
660	140.378	93.1276	Emission	1
662	136.674	70.0813	Emission	1
664	157.884	77.7251	Emission	1
666	135.094	55.5182	Emission	1
668	82.4524	71.7595	Emission	1
670	104.118	42.9551	Emission	1
672	97.3045	71.5869	Emission	1
674	97.9347	62.2307	Emission	1
676	117.281	18.4607	Emission	1
678	80.5649	50.4376	Emission	1
680	71.5649	26.3801	Emission	1
682	77.0708	65.6788	Emission	1
684	87.2069	25.5982	Emission	1
686	64.0087	11.6676	Emission	1
688	76.0472	11.7363	Emission	1
690	66.8993	74.7475	Emission	1
692	73.8993	57.9776	Emission	1
694	54.4792	51.92	Emission	1
696	45.9851	50.7707	Emission	1
698	46.5531	60.3338	Emission	1
700	55.6892	32.3682	Emission	1
702	54.1094	15.0694	Emission	1
704	26.3312	32.3682	Emission	1
706	30.5413	29.3107	Emission	1
708	58.4052	42.3107	Emission	1
710	35.6035	6.4488	Emission	1
712	57.3194	33.5175	Emission	1
714	32.3194	18.7475	Emission	1
716	28.4673	12.69	Emission	1
718	28.0236	20.1038	Emission	1
720	28.0236	22.9313	Emission	1
722	31.0976	10.3107	Emission	1
724	34.6538	20.5175	Emission	1
726	13.0236	20.9313	Emission	1
728	22.2455	1.89691	Emission	1
730	9.09756	-0.0112249	Emission	1
732	9.87569	10.1038	Emission	1
734	22.4555	7.40252	Emission	1
736	24.6538	18.5519	Emission	1
738	26.0858	22.8738	Emission	1
740	18.5177	42.8163	Emission	1
742	-3.18647	-2.2756	Emission	1
744	10.3698	17.9313	Emission	1
746	11.7278	15.5519	Emission	1
748	0.813533	4.98878	Emission	1
750	-2.33438	9.13814	Emission	1
510	22492.7	2745.82	Emission	2
512	22595.8	2868.34	Emission	2
514	23016.9	3005.98	Emission	2
516	22498.1	3045.8	Emission	2
518	21905.8	3051.1	Emission	2
520	20900.5	3045.33	Emission	2
522	20018.2	2994.72	Emission	2
524	18552.4	2782.1	Emission	2
526	16948.4	2629.18	Emission	2
528	16122.3	2600.31	Emission	2
530	14789.6	2297.91	Emission	2
532	13526.1	2036.14	Emission	2
534	12485.9	1892.96	Emission	2
536	12077.9	1738.22	Emission	2
538	11064.7	1652.48	Emission	2
540	10323	1576.81	Emission	2
542	9894.89	1379.66	Emission	2
544	9387.31	1300.13	Emission	2
546	8846.08	1315.97	Emission	2
548	8369.21	1189.03	Emission	2
550	7932.13	1108.48	Emission	2
552	7480.79	1126.32	Emission	2
554	7090.63	935.162	Emission	2
556	6462.55	939.887	Emission	2
558	6243.44	1005.91	Emission	2
560	5679.64	862.653	Emission	2
562	5061.38	808.422	Emission	2
564	4734.57	694.611	Emission	2
566	4219.9	653.939	Emission	2
568	3966.73	739.884	Emission	2
570	3522.56	634.597	Emission	2
572	3323.1	622.524	Emission	2
574	3005.99	499.587	Emission	2
576	2795.63	560.349	Emission	2
578	2579.01	438.921	Emission	2
580	2366.18	397.721	Emission	2
582	2197.11	419.994	Emission	2
584	2026.47	434.535	Emission	2
586	1932.85	463.094	Emission	2
588	1767.5	357.411	Emission	2
590	1728.04	313.608	Emission	2
592	1506.71	323.828	Emission	2
594	1479.7	351.135	Emission	2
596	1345.06	285.235	Emission	2
598	1237.9	281.146	Emission	2
600	1245.05	267.815	Emission	2
602	1057.79	225.442	Emission	2
604	989.297	231.167	Emission	2
606	916.875	206.122	Emission	2
608	935.866	245.153	Emission	2
610	862.324	202.988	Emission	2
612	752.608	156.043	Emission	2
614	697.111	156.888	Emission	2
616	593.844	178.25	Emission	2
618	671.551	165.009	Emission	2
620	534.377	180.668	Emission	2
622	535.884	152.264	Emission	2
624	516.093	145.229	Emission	2
626	484.479	130.416	Emission	2
628	501.946	151.733	Emission	2
630	429.386	128.899	Emission	2
632	403.706	100.185	Emission	2
634	407.844	105.261	Emission	2
636	315.266	136.809	Emission	2
638	321.44	129.171	Emission	2
640	314.604	112.754	Emission	2
642	260.035	135.995	Emission	2
644	227.311	133.83	Emission	2
646	233.906	58.4679	Emission	2
648	235.071	97.1818	Emission	2
650	225.64	74.4232	Emission	2
652	167.302	118.444	Emission	2
654	190.217	87.0819	Emission	2
656	183.106	101.917	Emission	2
658	193.262	98.3994	Emission	2
660	192.289	92.0268	Emission	2
662	156.702	82.3442	Emission	2
664	133.28	88.1028	Emission	2
666	130.858	42.6304	Emission	2
668	109.142	78.4649	Emission	2
670	118.822	33.9165	Emission	2
672	141.435	63.3547	Emission	2
674	117.169	87.1132	Emission	2
676	150.471	12.9269	Emission	2
678	106.902	27.5857	Emission	2
680	102.902	47.8822	Emission	2
682	84.8932	42.4202	Emission	2
684	84.6176	74.3755	Emission	2
686	60.022	6.39937	Emission	2
688	64.9288	41.1237	Emission	2
690	81.2221	52.1445	Emission	2
692	66.2221	16.9583	Emission	2
694	102.067	53.2548	Emission	2
696	33.0576	51.4858	Emission	2
698	60.9199	52.1997	Emission	2
700	41.6443	35.5618	Emission	2
702	43.7999	49.0238	Emission	2
704	51.3599	24.5618	Emission	2
706	42.9377	18.8584	Emission	2
708	57.2132	30.8584	Emission	2
710	53.8088	29.6065	Emission	2
712	24.3777	42.3308	Emission	2
714	45.3777	-15.8555	Emission	2
716	43.0844	33.4411	Emission	2
718	36.9644	8.38598	Emission	2
720	21.9644	28.2757	Emission	2
722	26.8177	-0.141591	Emission	2
724	38.6978	3.33084	Emission	2
726	16.9644	9.2757	Emission	2
728	39.5244	3.91355	Emission	2
730	23.8177	5.97913	Emission	2
732	34.2577	21.386	Emission	2
734	24.1022	5.92399	Emission	2
736	24.6978	10.693	Emission	2
738	27.8355	3.57227	Emission	2
740	15.9733	15.8688	Emission	2
742	32.3866	2.80327	Emission	2
744	15.2666	5.2757	Emission	2
746	3.55108	13.693	Emission	2
748	5.3866	11.9791	Emission	2
750	31.6799	2.74813	Emission	2

## Sheet: b
Construct	dFF_ROI.1	dFF_ROI.2	dFF_ROI.3	dFF_ROI.4	dFF_ROI.5	dFF_ROI_mean	label
V0.1	0.513665	0.509925	0.372374	0.53553	0.0338225	0.393063	V0.1
V0.2	3.47929	4.58464	2.27726	3.23459	2.70449	3.25605
V0.1_QK-cpGFP	2.91394	2.96179	2.65874	2.97083	2.52522	2.8061
V0.2_S-cpGFP	5.11344	2.15546	3.88548	2.96124	3.13037	3.4492
V0.2_SP-cpGFP	2.32019	2.12083	2.51158	1.14046	2.14751	2.04811
V0.2_SPD-cpGFP	1.26785	1.23333	0.795171	1.40797	1.12744	1.16635
V0.2_cpGFP-DMGG	0.0435173	0.112199	0.059401	0.0464998	0.0599621	0.0643159
V0.2_cpGFP-MGG	0.296573	0.12073	0.105025	0.221696	0.299162	0.208637
V0.2_cpGFP-GG	0.204948	0.048674	0.042987	0.0200489	0.0325107	0.0698337
V0.2_cpGFP-G	2.76868	2.32666	2.71354	3.19104	2.73728	2.74744
V0.2_TKK-ICL2	2.96802	4.20814	3.74305	4.23218	6.64448	4.35917
V0.2_TKK_KLQ-del-cpGFP	2.14046	2.57476	2.15136	1.72666	2.13975	2.1466
V0.2_TKK_LQ-del-cpGFP	2.80526	4.44932	3.6414	3.23765	3.95233	3.61719
V0.2_TKK_QL-del-cpGFP	3.6597	4.14613	3.94904	4.00268	4.15542	3.98259
V0.2_TKK_L-del-cpGFP	2.63037	2.44817	0.862662	1.07254	2.88211	1.97917
V0.2_TKK_QK-cpGFP	4.45321	3.38939	4.11873	5.23205	4.28202	4.29508
V0.2_TKK_QR-cpGFP	7.13173	8.27349	10.718	6.66763	9.58173	8.47453
V0.2_TKK_QSK-cpGFP	7.1483	6.13683	7.58989	7.33305	4.97822	6.63726
V0.2_TKK_QSQ-cpGFP	5.29993	7.59451	7.74248	6.69679	6.75231	6.8172
V0.2_TKK_QSR-cpGFP	5.63212	6.00441	6.03628	5.24325	5.60969	5.70515
V0.2_KORt	1.50029	2.31794	3.29689	2.75035	1.32281	2.23766
V0.2_439-468-del	-0.187693	0.0657386	0.178399	-0.491508	0.455613	0.00410987
V0.2_S459A	3.34991	4.41048	3.64109	2.3112	2.16988	3.17651
V0.2_T468A	3.64378	5.5942	6.57701	4.2594	5.15224	5.04533
V0.2_TKK-ICL2_T468A	8.73573	9.85027	10.8375	9.66667	9.78461	9.77495
V0.3	6.28415	8.86867	6.66557	8.24098	7.53464	7.5188
V0.2_TKK-ICL2_4Ss-4As	3.78381	5.63251	6.05521	4.75901	2.39553	4.52521
V0.2_HFF-ICL2	3.99423	2.94285	2.66609	1.62951	1.74776	2.59609
V0.2_TFK-ICL2	2.34386	2.68797	3.65732	4.99701	4.74537	3.68631
V0.2_KKK-ICL2	6.70961	7.7918	6.84852	4.76913	8.46511	6.91684
V0.2_TEF-ICL2	4.47071	4.52269	3.63593	3.00334	2.24102	3.57474
V0.2_TEF-ICL2	3.94159	2.82293	2.97781	2.75167	4.61492	3.42179
V0.2_KFF-ICL2	4.80453	4.79805	4.44113	4.95161	2.05627	4.21032
V0.2_KFF-ICL2	6.83739	5.81639	6.33248	4.35047	6.72639	6.01263
V0.2_KFF-ICL2	5.79965	3.27682	4.95284	5.86099	4.15354	4.80877
V0.2_SP-BB_KFF-IC2	1.58411	2.56682	2.1204	2.46809	1.92945	2.13377
V0.2_TKK-ICL2	8.07291	8.84254	3.02348	5.83691	3.81892	5.91895
V0.2_TKK-ICL2	5.78479	7.75196	5.42989	3.83286	7.52302	6.0645
V0.2_SP-BB_TKK-ICL2	3.61445	3.43448	3.3713	2.70464	3.12172	3.24932
V0.2_TKKK-ICL2	9.96545	9.69379	11.1262	11.1619	10.7627	10.542
V0.2_TKKKK-ICL2	8.56555	11.6923	11.6636	10.3252	7.53264	9.95584
V0.2_KKK-ICL2	7.63043	6.2681	1.96486	7.51388	7.70583	6.21662
V0.2_TKK-ICL2	6.93104	8.5012	7.382	9.01347	5.78986	7.52351
V0.2_TKKK-ICL2	8.5087	8.24562	9.87921	8.18915	8.39153	8.64284
V0.2_TKKKK-ICL2	9.11404	8.4292	8.66485	9.63638	8.23773	8.81644
PAClight2	9.31666	8.3682	9.12127	9.95035	11.674	9.68609	PAClight2
PAClight2	9.73983	11.2735	12.0471	10.9793	10.1624	10.8404	PAClight2
V0.2_TKKKK-ICL2_T468A	7.23434	8.23775	5.93841	5.82041	6.02969	6.65212
PAClight2_QR-cpGFP	11.1353	10.9734	11.9671	11.9099	11.4488	11.4869
PAClight2	10.1408	11.4003	12.1258	9.65327	13.5168	11.3674	PAClight2
PAClight2_QR-cpGFP	10.9874	9.17242	10.5696	10.6427	8.33514	9.94147
PAClight2_QR-cpGFP	9.15292	10.2388	7.71044	5.96187	5.00498	7.61381
PAClight2_D87A	10.161	11.2895	6.64828	10.532	9.22627	9.57141
PAClight2_F100A	13.304	12.8679	8.47244	8.57311	9.63352	10.5702
PAClight2_F131A	9.26009	7.90516	8.45339	11.1366	9.20602	9.19225
PAClight2_F79A	7.67936	9.8872	11.3737	8.56581	8.62948	9.2271
PAClight2_I61A	9.96216	10.2139	6.67238	7.72732	8.21462	8.55807
PAClight2_N60H	9.61201	6.62634	9.12648	12.7321	5.38541	8.69646
PAClight2_N60R	8.57175	7.83099	8.73489	4.54596	9.19148	7.77501
PAClight2_P78A	8.77814	8.79108	11.0585	7.0392	8.47563	8.82852
PAClight2_PAC1s	4.8517	5.00663	7.643	6.67456	8.02576	6.44033
PAClight2_R82A	9.11461	9.34284	10.2172	7.55427	6.60014	8.56582
PAClight2_Y139A	5.12599	9.64077	9.56406	5.13791	3.72639	6.63902
PAClight1	11.5798	10.2792	9.86684	11.786	7.11183	10.1247	PAClight1
PAClight1	12.0212	10.2424	12.0538	11.1328	10.7955	11.2491	PAClight1
PAClight1	8.35622	13.4515	6.50958	12.7299	9.7599	10.1614	PAClight1
PAClight1	11.135	8.90343	13.7666	10.1315	8.81149	10.5496	PAClight1

## Sheet: c
CellType	Replicate	maxDF
HEK293T	1.csv	9.81094
HEK293T	2.csv	11.1153
HEK293T	3.csv	11.0398
Neurons	1.csv	11.023
Neurons	2.csv	8.10316
Neurons	3.csv	7.35125
