# Supplementary material for: Probing PAC1 receptor activation across species with an engineered sensor
Source: eLife. 2024 Aug 15;13:RP96496. doi: 10.7554/eLife.96496 (PMC11326774; doi:10.7554/eLife.96496)
Supplement: Figure 2—source data 1. [file elife-96496-fig2-data1.xlsx]

## Sheet: c-d
name	group	FITC-A
dLight1.3b _ 1	dLight1.3b	889.92
dLight1.3b _ 1	dLight1.3b	973.44
dLight1.3b _ 1	dLight1.3b	904.32
dLight1.3b _ 1	dLight1.3b	676.8
dLight1.3b _ 1	dLight1.3b	593.28
dLight1.3b _ 1	dLight1.3b	754.56
dLight1.3b _ 1	dLight1.3b	2954.88
dLight1.3b _ 1	dLight1.3b	580.32
dLight1.3b _ 1	dLight1.3b	584.64
dLight1.3b _ 1	dLight1.3b	2406.24
dLight1.3b _ 1	dLight1.3b	852.48
dLight1.3b _ 1	dLight1.3b	2797.92
dLight1.3b _ 1	dLight1.3b	770.4
dLight1.3b _ 1	dLight1.3b	668.16
dLight1.3b _ 1	dLight1.3b	231.84
dLight1.3b _ 1	dLight1.3b	1275.84
dLight1.3b _ 1	dLight1.3b	1189.44
dLight1.3b _ 1	dLight1.3b	338.4
dLight1.3b _ 1	dLight1.3b	599.04
dLight1.3b _ 1	dLight1.3b	1255.68
dLight1.3b _ 1	dLight1.3b	1658.88
dLight1.3b _ 1	dLight1.3b	637.92
dLight1.3b _ 1	dLight1.3b	560.16
dLight1.3b _ 1	dLight1.3b	2126.88
dLight1.3b _ 1	dLight1.3b	600.48
dLight1.3b _ 1	dLight1.3b	810.72
dLight1.3b _ 1	dLight1.3b	1641.6
dLight1.3b _ 1	dLight1.3b	666.72
dLight1.3b _ 1	dLight1.3b	813.6
dLight1.3b _ 1	dLight1.3b	1163.52
dLight1.3b _ 1	dLight1.3b	1509.12
dLight1.3b _ 1	dLight1.3b	390.24
dLight1.3b _ 1	dLight1.3b	779.04
dLight1.3b _ 1	dLight1.3b	635.04
dLight1.3b _ 1	dLight1.3b	872.64
dLight1.3b _ 1	dLight1.3b	3674.88
dLight1.3b _ 1	dLight1.3b	645.12
dLight1.3b _ 1	dLight1.3b	704.16
dLight1.3b _ 1	dLight1.3b	783.36
dLight1.3b _ 1	dLight1.3b	760.32
dLight1.3b _ 1	dLight1.3b	588.96
dLight1.3b _ 1	dLight1.3b	423.36
dLight1.3b _ 1	dLight1.3b	1052.64
dLight1.3b _ 1	dLight1.3b	707.04
dLight1.3b _ 1	dLight1.3b	201.6
dLight1.3b _ 1	dLight1.3b	1444.32
dLight1.3b _ 1	dLight1.3b	365.76
dLight1.3b _ 1	dLight1.3b	620.64
dLight1.3b _ 1	dLight1.3b	627.84
dLight1.3b _ 1	dLight1.3b	434.88
dLight1.3b _ 1	dLight1.3b	948.96
dLight1.3b _ 1	dLight1.3b	535.68
dLight1.3b _ 1	dLight1.3b	250.56
dLight1.3b _ 1	dLight1.3b	525.6
dLight1.3b _ 1	dLight1.3b	483.84
dLight1.3b _ 1	dLight1.3b	276.48
dLight1.3b _ 1	dLight1.3b	1054.08
dLight1.3b _ 1	dLight1.3b	983.52
dLight1.3b _ 1	dLight1.3b	531.36
dLight1.3b _ 1	dLight1.3b	911.52
dLight1.3b _ 1	dLight1.3b	771.84
dLight1.3b _ 1	dLight1.3b	498.24
dLight1.3b _ 1	dLight1.3b	780.48
dLight1.3b _ 1	dLight1.3b	662.4
dLight1.3b _ 1	dLight1.3b	1540.8
dLight1.3b _ 1	dLight1.3b	2576.16
dLight1.3b _ 1	dLight1.3b	789.12
dLight1.3b _ 1	dLight1.3b	601.92
dLight1.3b _ 1	dLight1.3b	656.64
dLight1.3b _ 1	dLight1.3b	741.6
dLight1.3b _ 1	dLight1.3b	2180.16
dLight1.3b _ 1	dLight1.3b	424.8
dLight1.3b _ 1	dLight1.3b	165.6
dLight1.3b _ 1	dLight1.3b	612
dLight1.3b _ 1	dLight1.3b	928.8
dLight1.3b _ 1	dLight1.3b	601.92
dLight1.3b _ 1	dLight1.3b	1128.96
dLight1.3b _ 1	dLight1.3b	730.08
dLight1.3b _ 1	dLight1.3b	1321.92
dLight1.3b _ 1	dLight1.3b	1069.92
dLight1.3b _ 1	dLight1.3b	1464.48
dLight1.3b _ 1	dLight1.3b	1267.2
dLight1.3b _ 1	dLight1.3b	604.8
dLight1.3b _ 1	dLight1.3b	757.44
dLight1.3b _ 1	dLight1.3b	826.56
dLight1.3b _ 1	dLight1.3b	691.2
dLight1.3b _ 1	dLight1.3b	953.28
dLight1.3b _ 1	dLight1.3b	5.76
dLight1.3b _ 1	dLight1.3b	491.04
dLight1.3b _ 1	dLight1.3b	606.24
dLight1.3b _ 1	dLight1.3b	1506.24
dLight1.3b _ 1	dLight1.3b	501.12
dLight1.3b _ 1	dLight1.3b	475.2
dLight1.3b _ 1	dLight1.3b	637.92
dLight1.3b _ 1	dLight1.3b	912.96
dLight1.3b _ 1	dLight1.3b	400.32
dLight1.3b _ 1	dLight1.3b	1013.76
dLight1.3b _ 1	dLight1.3b	277.92
dLight1.3b _ 1	dLight1.3b	3938.4
dLight1.3b _ 1	dLight1.3b	571.68
dLight1.3b _ 1	dLight1.3b	1065.6
dLight1.3b _ 1	dLight1.3b	1052.64
dLight1.3b _ 1	dLight1.3b	787.68
dLight1.3b _ 1	dLight1.3b	496.8
dLight1.3b _ 1	dLight1.3b	604.8
dLight1.3b _ 1	dLight1.3b	456.48
dLight1.3b _ 1	dLight1.3b	635.04
dLight1.3b _ 1	dLight1.3b	555.84
dLight1.3b _ 1	dLight1.3b	874.08
dLight1.3b _ 1	dLight1.3b	538.56
dLight1.3b _ 1	dLight1.3b	1140.48
dLight1.3b _ 1	dLight1.3b	753.12
dLight1.3b _ 1	dLight1.3b	298.08
dLight1.3b _ 1	dLight1.3b	1238.4
dLight1.3b _ 1	dLight1.3b	502.56
dLight1.3b _ 1	dLight1.3b	799.2
dLight1.3b _ 1	dLight1.3b	181.44
dLight1.3b _ 1	dLight1.3b	2113.92
dLight1.3b _ 1	dLight1.3b	429.12
dLight1.3b _ 1	dLight1.3b	476.64
dLight1.3b _ 1	dLight1.3b	465.12
dLight1.3b _ 1	dLight1.3b	627.84
dLight1.3b _ 1	dLight1.3b	649.44
dLight1.3b _ 1	dLight1.3b	868.32
dLight1.3b _ 1	dLight1.3b	1419.84
dLight1.3b _ 1	dLight1.3b	1864.8
dLight1.3b _ 1	dLight1.3b	403.2
dLight1.3b _ 1	dLight1.3b	1029.6
dLight1.3b _ 1	dLight1.3b	542.88
dLight1.3b _ 1	dLight1.3b	480.96
dLight1.3b _ 1	dLight1.3b	997.92
dLight1.3b _ 1	dLight1.3b	635.04
dLight1.3b _ 1	dLight1.3b	825.12
dLight1.3b _ 1	dLight1.3b	943.2
dLight1.3b _ 1	dLight1.3b	1005.12
dLight1.3b _ 1	dLight1.3b	2494.08
dLight1.3b _ 1	dLight1.3b	682.56
dLight1.3b _ 1	dLight1.3b	1033.92
dLight1.3b _ 1	dLight1.3b	1126.08
dLight1.3b _ 1	dLight1.3b	342.72
dLight1.3b _ 1	dLight1.3b	577.44
dLight1.3b _ 1	dLight1.3b	653.76
dLight1.3b _ 1	dLight1.3b	741.6
dLight1.3b _ 1	dLight1.3b	869.76
dLight1.3b _ 1	dLight1.3b	384.48
dLight1.3b _ 1	dLight1.3b	760.32
dLight1.3b _ 1	dLight1.3b	1196.64
dLight1.3b _ 1	dLight1.3b	738.72
dLight1.3b _ 1	dLight1.3b	898.56
dLight1.3b _ 1	dLight1.3b	1071.36
dLight1.3b _ 1	dLight1.3b	676.8
dLight1.3b _ 1	dLight1.3b	84.96
dLight1.3b _ 1	dLight1.3b	961.92
dLight1.3b _ 1	dLight1.3b	1722.24
dLight1.3b _ 1	dLight1.3b	997.92
dLight1.3b _ 1	dLight1.3b	1147.68
dLight1.3b _ 1	dLight1.3b	2327.04
dLight1.3b _ 1	dLight1.3b	413.28
dLight1.3b _ 1	dLight1.3b	649.44
dLight1.3b _ 1	dLight1.3b	720
dLight1.3b _ 1	dLight1.3b	525.6
dLight1.3b _ 1	dLight1.3b	2077.92
dLight1.3b _ 1	dLight1.3b	432
dLight1.3b _ 1	dLight1.3b	1196.64
dLight1.3b _ 1	dLight1.3b	617.76
dLight1.3b _ 1	dLight1.3b	1249.92
dLight1.3b _ 1	dLight1.3b	974.88
dLight1.3b _ 1	dLight1.3b	724.32
dLight1.3b _ 1	dLight1.3b	328.32
dLight1.3b _ 1	dLight1.3b	884.16
dLight1.3b _ 1	dLight1.3b	675.36
dLight1.3b _ 1	dLight1.3b	1012.32
dLight1.3b _ 1	dLight1.3b	659.52
dLight1.3b _ 1	dLight1.3b	2633.76
dLight1.3b _ 1	dLight1.3b	927.36
dLight1.3b _ 1	dLight1.3b	558.72
dLight1.3b _ 1	dLight1.3b	806.4
dLight1.3b _ 1	dLight1.3b	1504.8
dLight1.3b _ 1	dLight1.3b	1447.2
dLight1.3b _ 1	dLight1.3b	766.08
dLight1.3b _ 1	dLight1.3b	2255.04
dLight1.3b _ 1	dLight1.3b	1130.4
dLight1.3b _ 1	dLight1.3b	923.04
dLight1.3b _ 1	dLight1.3b	974.88
dLight1.3b _ 1	dLight1.3b	754.56
dLight1.3b _ 1	dLight1.3b	1376.64
dLight1.3b _ 1	dLight1.3b	953.28
dLight1.3b _ 1	dLight1.3b	1173.6
dLight1.3b _ 1	dLight1.3b	1260
dLight1.3b _ 1	dLight1.3b	397.44
dLight1.3b _ 1	dLight1.3b	1704.96
dLight1.3b _ 1	dLight1.3b	1188
dLight1.3b _ 1	dLight1.3b	584.64
dLight1.3b _ 1	dLight1.3b	721.44
dLight1.3b _ 1	dLight1.3b	1404
dLight1.3b _ 1	dLight1.3b	790.56
dLight1.3b _ 1	dLight1.3b	829.44
dLight1.3b _ 1	dLight1.3b	645.12
dLight1.3b _ 1	dLight1.3b	917.28
dLight1.3b _ 1	dLight1.3b	676.8
dLight1.3b _ 1	dLight1.3b	2037.6
dLight1.3b _ 1	dLight1.3b	668.16
dLight1.3b _ 1	dLight1.3b	518.4
dLight1.3b _ 1	dLight1.3b	960.48
dLight1.3b _ 1	dLight1.3b	897.12
dLight1.3b _ 1	dLight1.3b	748.8
dLight1.3b _ 1	dLight1.3b	948.96
dLight1.3b _ 1	dLight1.3b	933.12
dLight1.3b _ 1	dLight1.3b	590.4
dLight1.3b _ 1	dLight1.3b	334.08
dLight1.3b _ 1	dLight1.3b	2040.48
dLight1.3b _ 1	dLight1.3b	2240.64
dLight1.3b _ 1	dLight1.3b	514.08
dLight1.3b _ 1	dLight1.3b	2221.92
dLight1.3b _ 1	dLight1.3b	2069.28
dLight1.3b _ 1	dLight1.3b	1277.28
dLight1.3b _ 1	dLight1.3b	768.96
dLight1.3b _ 1	dLight1.3b	221.76
dLight1.3b _ 1	dLight1.3b	705.6
dLight1.3b _ 1	dLight1.3b	904.32
dLight1.3b _ 1	dLight1.3b	963.36
dLight1.3b _ 1	dLight1.3b	846.72
dLight1.3b _ 1	dLight1.3b	1218.24
dLight1.3b _ 1	dLight1.3b	591.84
dLight1.3b _ 1	dLight1.3b	1481.76
dLight1.3b _ 1	dLight1.3b	632.16
dLight1.3b _ 1	dLight1.3b	626.4
dLight1.3b _ 1	dLight1.3b	807.84
dLight1.3b _ 1	dLight1.3b	1002.24
dLight1.3b _ 1	dLight1.3b	793.44
dLight1.3b _ 1	dLight1.3b	921.6
dLight1.3b _ 1	dLight1.3b	1196.64
dLight1.3b _ 1	dLight1.3b	508.32
dLight1.3b _ 1	dLight1.3b	849.6
dLight1.3b _ 1	dLight1.3b	1013.76
dLight1.3b _ 1	dLight1.3b	692.64
dLight1.3b _ 1	dLight1.3b	800.64
dLight1.3b _ 1	dLight1.3b	547.2
dLight1.3b _ 1	dLight1.3b	2132.64
dLight1.3b _ 1	dLight1.3b	861.12
dLight1.3b _ 1	dLight1.3b	767.52
dLight1.3b _ 1	dLight1.3b	692.64
dLight1.3b _ 1	dLight1.3b	732.96
dLight1.3b _ 1	dLight1.3b	923.04
dLight1.3b _ 1	dLight1.3b	1596.96
dLight1.3b _ 1	dLight1.3b	581.76
dLight1.3b _ 1	dLight1.3b	672.48
dLight1.3b _ 1	dLight1.3b	1830.24
dLight1.3b _ 1	dLight1.3b	642.24
dLight1.3b _ 1	dLight1.3b	424.8
dLight1.3b _ 1	dLight1.3b	604.8
dLight1.3b _ 1	dLight1.3b	1128.96
dLight1.3b _ 1	dLight1.3b	1211.04
dLight1.3b _ 1	dLight1.3b	835.2
dLight1.3b _ 1	dLight1.3b	865.44
dLight1.3b _ 1	dLight1.3b	773.28
dLight1.3b _ 1	dLight1.3b	1435.68
dLight1.3b _ 1	dLight1.3b	771.84
dLight1.3b _ 1	dLight1.3b	786.24
dLight1.3b _ 1	dLight1.3b	1078.56
dLight1.3b _ 1	dLight1.3b	954.72
dLight1.3b _ 1	dLight1.3b	1031.04
dLight1.3b _ 1	dLight1.3b	696.96
dLight1.3b _ 1	dLight1.3b	442.08
dLight1.3b _ 1	dLight1.3b	544.32
dLight1.3b _ 1	dLight1.3b	933.12
dLight1.3b _ 1	dLight1.3b	1415.52
dLight1.3b _ 1	dLight1.3b	673.92
dLight1.3b _ 1	dLight1.3b	1193.76
dLight1.3b _ 1	dLight1.3b	2724.48
dLight1.3b _ 1	dLight1.3b	864
dLight1.3b _ 1	dLight1.3b	154.08
dLight1.3b _ 1	dLight1.3b	4063.68
dLight1.3b _ 1	dLight1.3b	1579.68
dLight1.3b _ 1	dLight1.3b	1886.4
dLight1.3b _ 1	dLight1.3b	146.88
dLight1.3b _ 1	dLight1.3b	1042.56
dLight1.3b _ 1	dLight1.3b	1333.44
dLight1.3b _ 1	dLight1.3b	823.68
dLight1.3b _ 1	dLight1.3b	1051.2
dLight1.3b _ 1	dLight1.3b	989.28
dLight1.3b _ 1	dLight1.3b	1254.24
dLight1.3b _ 1	dLight1.3b	7431.84
dLight1.3b _ 1	dLight1.3b	452.16
dLight1.3b _ 1	dLight1.3b	1706.4
dLight1.3b _ 1	dLight1.3b	986.4
dLight1.3b _ 1	dLight1.3b	604.8
dLight1.3b _ 1	dLight1.3b	648
dLight1.3b _ 1	dLight1.3b	671.04
dLight1.3b _ 1	dLight1.3b	815.04
dLight1.3b _ 1	dLight1.3b	1758.24
dLight1.3b _ 1	dLight1.3b	3456
dLight1.3b _ 1	dLight1.3b	1042.56
dLight1.3b _ 1	dLight1.3b	633.6
dLight1.3b _ 1	dLight1.3b	722.88
dLight1.3b _ 1	dLight1.3b	986.4
dLight1.3b _ 1	dLight1.3b	676.8
dLight1.3b _ 1	dLight1.3b	924.48
dLight1.3b _ 1	dLight1.3b	751.68
dLight1.3b _ 1	dLight1.3b	966.24
dLight1.3b _ 1	dLight1.3b	421.92
dLight1.3b _ 1	dLight1.3b	1032.48
dLight1.3b _ 1	dLight1.3b	856.8
dLight1.3b _ 1	dLight1.3b	1683.36
dLight1.3b _ 1	dLight1.3b	565.92
dLight1.3b _ 1	dLight1.3b	447.84
dLight1.3b _ 1	dLight1.3b	1480.32
dLight1.3b _ 1	dLight1.3b	1150.56
dLight1.3b _ 1	dLight1.3b	767.52
dLight1.3b _ 1	dLight1.3b	1116
dLight1.3b _ 1	dLight1.3b	878.4
dLight1.3b _ 1	dLight1.3b	2498.4
dLight1.3b _ 1	dLight1.3b	905.76
dLight1.3b _ 1	dLight1.3b	279.36
dLight1.3b _ 1	dLight1.3b	594.72
dLight1.3b _ 1	dLight1.3b	580.32
dLight1.3b _ 1	dLight1.3b	1242.72
dLight1.3b _ 1	dLight1.3b	646.56
dLight1.3b _ 1	dLight1.3b	907.2
dLight1.3b _ 1	dLight1.3b	502.56
dLight1.3b _ 1	dLight1.3b	1474.56
dLight1.3b _ 1	dLight1.3b	660.96
dLight1.3b _ 1	dLight1.3b	987.84
dLight1.3b _ 1	dLight1.3b	550.08
dLight1.3b _ 1	dLight1.3b	4089.6
dLight1.3b _ 1	dLight1.3b	2473.92
dLight1.3b _ 1	dLight1.3b	624.96
dLight1.3b _ 1	dLight1.3b	548.64
dLight1.3b _ 1	dLight1.3b	1170.72
dLight1.3b _ 1	dLight1.3b	532.8
dLight1.3b _ 1	dLight1.3b	355.68
dLight1.3b _ 1	dLight1.3b	643.68
dLight1.3b _ 1	dLight1.3b	921.6
dLight1.3b _ 1	dLight1.3b	1117.44
dLight1.3b _ 1	dLight1.3b	1370.88
dLight1.3b _ 1	dLight1.3b	522.72
dLight1.3b _ 1	dLight1.3b	1514.88
dLight1.3b _ 1	dLight1.3b	1213.92
dLight1.3b _ 1	dLight1.3b	292.32
dLight1.3b _ 1	dLight1.3b	2252.16
dLight1.3b _ 1	dLight1.3b	688.32
dLight1.3b _ 1	dLight1.3b	702.72
dLight1.3b _ 1	dLight1.3b	816.48
dLight1.3b _ 1	dLight1.3b	1242.72
dLight1.3b _ 1	dLight1.3b	504
dLight1.3b _ 1	dLight1.3b	838.08
dLight1.3b _ 1	dLight1.3b	652.32
dLight1.3b _ 1	dLight1.3b	548.64
dLight1.3b _ 1	dLight1.3b	407.52
dLight1.3b _ 1	dLight1.3b	2250.72
dLight1.3b _ 1	dLight1.3b	616.32
dLight1.3b _ 1	dLight1.3b	781.92
dLight1.3b _ 1	dLight1.3b	1054.08
dLight1.3b _ 1	dLight1.3b	2579.04
dLight1.3b _ 1	dLight1.3b	1509.12
dLight1.3b _ 1	dLight1.3b	743.04
dLight1.3b _ 1	dLight1.3b	882.72
dLight1.3b _ 1	dLight1.3b	407.52
dLight1.3b _ 1	dLight1.3b	3087.36
dLight1.3b _ 1	dLight1.3b	684
dLight1.3b _ 1	dLight1.3b	756
dLight1.3b _ 1	dLight1.3b	707.04
dLight1.3b _ 1	dLight1.3b	806.4
dLight1.3b _ 1	dLight1.3b	835.2
dLight1.3b _ 1	dLight1.3b	1523.52
dLight1.3b _ 1	dLight1.3b	552.96
dLight1.3b _ 1	dLight1.3b	2095.2
dLight1.3b _ 1	dLight1.3b	838.08
dLight1.3b _ 1	dLight1.3b	984.96
dLight1.3b _ 1	dLight1.3b	1235.52
dLight1.3b _ 1	dLight1.3b	1190.88
dLight1.3b _ 1	dLight1.3b	3270.24
dLight1.3b _ 1	dLight1.3b	727.2
dLight1.3b _ 1	dLight1.3b	2367.36
dLight1.3b _ 1	dLight1.3b	1306.08
dLight1.3b _ 1	dLight1.3b	1147.68
dLight1.3b _ 1	dLight1.3b	685.44
dLight1.3b _ 1	dLight1.3b	717.12
dLight1.3b _ 1	dLight1.3b	954.72
dLight1.3b _ 1	dLight1.3b	637.92
dLight1.3b _ 1	dLight1.3b	843.84
dLight1.3b _ 1	dLight1.3b	688.32
dLight1.3b _ 1	dLight1.3b	2845.44
dLight1.3b _ 1	dLight1.3b	1222.56
dLight1.3b _ 1	dLight1.3b	744.48
dLight1.3b _ 1	dLight1.3b	588.96
dLight1.3b _ 1	dLight1.3b	825.12
dLight1.3b _ 1	dLight1.3b	548.64
dLight1.3b _ 1	dLight1.3b	980.64
dLight1.3b _ 1	dLight1.3b	329.76
dLight1.3b _ 1	dLight1.3b	502.56
dLight1.3b _ 1	dLight1.3b	859.68
dLight1.3b _ 1	dLight1.3b	813.6
dLight1.3b _ 1	dLight1.3b	168.48
dLight1.3b _ 1	dLight1.3b	1582.56
dLight1.3b _ 1	dLight1.3b	761.76
dLight1.3b _ 1	dLight1.3b	708.48
dLight1.3b _ 1	dLight1.3b	499.68
dLight1.3b _ 1	dLight1.3b	983.52
dLight1.3b _ 1	dLight1.3b	2144.16
dLight1.3b _ 1	dLight1.3b	505.44
dLight1.3b _ 1	dLight1.3b	843.84
dLight1.3b _ 1	dLight1.3b	666.72
dLight1.3b _ 1	dLight1.3b	1398.24
dLight1.3b _ 1	dLight1.3b	331.2
dLight1.3b _ 1	dLight1.3b	452.16
dLight1.3b _ 1	dLight1.3b	1189.44
dLight1.3b _ 1	dLight1.3b	1435.68
dLight1.3b _ 1	dLight1.3b	884.16
dLight1.3b _ 1	dLight1.3b	583.2
dLight1.3b _ 1	dLight1.3b	1347.84
dLight1.3b _ 1	dLight1.3b	439.2
dLight1.3b _ 1	dLight1.3b	105.12
dLight1.3b _ 1	dLight1.3b	1667.52
dLight1.3b _ 1	dLight1.3b	928.8
dLight1.3b _ 1	dLight1.3b	819.36
dLight1.3b _ 1	dLight1.3b	711.36
dLight1.3b _ 1	dLight1.3b	983.52
dLight1.3b _ 1	dLight1.3b	653.76
dLight1.3b _ 1	dLight1.3b	753.12
dLight1.3b _ 1	dLight1.3b	2155.68
dLight1.3b _ 1	dLight1.3b	581.76
dLight1.3b _ 1	dLight1.3b	1082.88
dLight1.3b _ 1	dLight1.3b	999.36
dLight1.3b _ 1	dLight1.3b	550.08
dLight1.3b _ 1	dLight1.3b	1477.44
dLight1.3b _ 1	dLight1.3b	984.96
dLight1.3b _ 1	dLight1.3b	1368
dLight1.3b _ 1	dLight1.3b	452.16
dLight1.3b _ 1	dLight1.3b	318.24
dLight1.3b _ 1	dLight1.3b	1317.6
dLight1.3b _ 1	dLight1.3b	888.48
dLight1.3b _ 1	dLight1.3b	900
dLight1.3b _ 1	dLight1.3b	620.64
dLight1.3b _ 1	dLight1.3b	591.84
dLight1.3b _ 1	dLight1.3b	498.24
dLight1.3b _ 1	dLight1.3b	1493.28
dLight1.3b _ 1	dLight1.3b	1869.12
dLight1.3b _ 1	dLight1.3b	1038.24
dLight1.3b _ 1	dLight1.3b	758.88
dLight1.3b _ 1	dLight1.3b	522.72
dLight1.3b _ 1	dLight1.3b	853.92
dLight1.3b _ 1	dLight1.3b	714.24
dLight1.3b _ 1	dLight1.3b	460.8
dLight1.3b _ 1	dLight1.3b	639.36
dLight1.3b _ 1	dLight1.3b	590.4
dLight1.3b _ 1	dLight1.3b	774.72
dLight1.3b _ 1	dLight1.3b	871.2
dLight1.3b _ 1	dLight1.3b	1293.12
dLight1.3b _ 1	dLight1.3b	565.92
dLight1.3b _ 1	dLight1.3b	767.52
dLight1.3b _ 1	dLight1.3b	856.8
dLight1.3b _ 1	dLight1.3b	780.48
dLight1.3b _ 1	dLight1.3b	456.48
dLight1.3b _ 1	dLight1.3b	813.6
dLight1.3b _ 1	dLight1.3b	793.44
dLight1.3b _ 1	dLight1.3b	843.84
dLight1.3b _ 1	dLight1.3b	1117.44
dLight1.3b _ 1	dLight1.3b	1107.36
dLight1.3b _ 1	dLight1.3b	835.2
dLight1.3b _ 1	dLight1.3b	832.32
dLight1.3b _ 1	dLight1.3b	1108.8
dLight1.3b _ 1	dLight1.3b	2134.08
dLight1.3b _ 1	dLight1.3b	658.08
dLight1.3b _ 1	dLight1.3b	790.56
dLight1.3b _ 1	dLight1.3b	959.04
dLight1.3b _ 1	dLight1.3b	671.04
dLight1.3b _ 1	dLight1.3b	1617.12
dLight1.3b _ 1	dLight1.3b	521.28
dLight1.3b _ 1	dLight1.3b	871.2
dLight1.3b _ 1	dLight1.3b	308.16
dLight1.3b _ 1	dLight1.3b	1922.4
dLight1.3b _ 1	dLight1.3b	573.12
dLight1.3b _ 1	dLight1.3b	5580
dLight1.3b _ 1	dLight1.3b	771.84
dLight1.3b _ 1	dLight1.3b	1163.52
dLight1.3b _ 1	dLight1.3b	515.52
dLight1.3b _ 1	dLight1.3b	1712.16
dLight1.3b _ 1	dLight1.3b	735.84
dLight1.3b _ 1	dLight1.3b	972
dLight1.3b _ 1	dLight1.3b	590.4
dLight1.3b _ 1	dLight1.3b	763.2
dLight1.3b _ 1	dLight1.3b	1478.88
dLight1.3b _ 1	dLight1.3b	1500.48
dLight1.3b _ 1	dLight1.3b	1369.44
dLight1.3b _ 1	dLight1.3b	460.8
dLight1.3b _ 1	dLight1.3b	675.36
dLight1.3b _ 1	dLight1.3b	406.08
dLight1.3b _ 1	dLight1.3b	737.28
dLight1.3b _ 1	dLight1.3b	740.16
dLight1.3b _ 1	dLight1.3b	869.76
dLight1.3b _ 1	dLight1.3b	771.84
dLight1.3b _ 1	dLight1.3b	816.48
dLight1.3b _ 1	dLight1.3b	767.52
dLight1.3b _ 1	dLight1.3b	524.16
dLight1.3b _ 1	dLight1.3b	1306.08
dLight1.3b _ 1	dLight1.3b	537.12
dLight1.3b _ 1	dLight1.3b	577.44
dLight1.3b _ 1	dLight1.3b	563.04
dLight1.3b _ 1	dLight1.3b	1222.56
dLight1.3b _ 1	dLight1.3b	773.28
dLight1.3b _ 1	dLight1.3b	802.08
dLight1.3b _ 1	dLight1.3b	1140.48
dLight1.3b _ 1	dLight1.3b	576
dLight1.3b _ 1	dLight1.3b	632.16
dLight1.3b _ 1	dLight1.3b	839.52
dLight1.3b _ 1	dLight1.3b	247.68
dLight1.3b _ 1	dLight1.3b	583.2
dLight1.3b _ 1	dLight1.3b	1594.08
dLight1.3b _ 1	dLight1.3b	619.2
dLight1.3b _ 1	dLight1.3b	1385.28
dLight1.3b _ 1	dLight1.3b	928.8
dLight1.3b _ 1	dLight1.3b	499.68
dLight1.3b _ 1	dLight1.3b	1249.92
dLight1.3b _ 1	dLight1.3b	1097.28
dLight1.3b _ 1	dLight1.3b	1684.8
dLight1.3b _ 1	dLight1.3b	925.92
dLight1.3b _ 1	dLight1.3b	751.68
dLight1.3b _ 1	dLight1.3b	1008
dLight1.3b _ 1	dLight1.3b	69.12
dLight1.3b _ 1	dLight1.3b	1962.72
dLight1.3b _ 1	dLight1.3b	4475.52
dLight1.3b _ 1	dLight1.3b	666.72
dLight1.3b _ 1	dLight1.3b	1765.44
dLight1.3b _ 1	dLight1.3b	1536.48
dLight1.3b _ 1	dLight1.3b	535.68
dLight1.3b _ 1	dLight1.3b	790.56
dLight1.3b _ 1	dLight1.3b	479.52
dLight1.3b _ 1	dLight1.3b	1235.52
dLight1.3b _ 1	dLight1.3b	973.44
dLight1.3b _ 1	dLight1.3b	663.84
dLight1.3b _ 1	dLight1.3b	803.52
dLight1.3b _ 1	dLight1.3b	519.84
dLight1.3b _ 1	dLight1.3b	496.8
dLight1.3b _ 1	dLight1.3b	859.68
dLight1.3b _ 1	dLight1.3b	724.32
dLight1.3b _ 1	dLight1.3b	840.96
dLight1.3b _ 1	dLight1.3b	2898.72
dLight1.3b _ 1	dLight1.3b	1725.12
dLight1.3b _ 1	dLight1.3b	557.28
dLight1.3b _ 1	dLight1.3b	2275.2
dLight1.3b _ 1	dLight1.3b	789.12
dLight1.3b _ 1	dLight1.3b	2450.88
dLight1.3b _ 1	dLight1.3b	1874.88
dLight1.3b _ 1	dLight1.3b	927.36
dLight1.3b _ 1	dLight1.3b	1621.44
dLight1.3b _ 1	dLight1.3b	2246.4
dLight1.3b _ 1	dLight1.3b	642.24
dLight1.3b _ 1	dLight1.3b	2164.32
dLight1.3b _ 1	dLight1.3b	1202.4
dLight1.3b _ 1	dLight1.3b	898.56
dLight1.3b _ 1	dLight1.3b	421.92
dLight1.3b _ 1	dLight1.3b	1589.76
dLight1.3b _ 1	dLight1.3b	715.68
dLight1.3b _ 1	dLight1.3b	761.76
dLight1.3b _ 1	dLight1.3b	355.68
dLight1.3b _ 1	dLight1.3b	1908
dLight1.3b _ 1	dLight1.3b	809.28
dLight1.3b _ 1	dLight1.3b	678.24
dLight1.3b _ 1	dLight1.3b	649.44
dLight1.3b _ 1	dLight1.3b	901.44
dLight1.3b _ 1	dLight1.3b	1023.84
dLight1.3b _ 1	dLight1.3b	995.04
dLight1.3b _ 1	dLight1.3b	535.68
dLight1.3b _ 1	dLight1.3b	453.6
dLight1.3b _ 1	dLight1.3b	468
dLight1.3b _ 1	dLight1.3b	298.08
dLight1.3b _ 1	dLight1.3b	1692
dLight1.3b _ 1	dLight1.3b	767.52
dLight1.3b _ 1	dLight1.3b	2062.08
dLight1.3b _ 1	dLight1.3b	848.16
dLight1.3b _ 1	dLight1.3b	1981.44
dLight1.3b _ 1	dLight1.3b	456.48
dLight1.3b _ 1	dLight1.3b	996.48
dLight1.3b _ 1	dLight1.3b	617.76
dLight1.3b _ 1	dLight1.3b	515.52
dLight1.3b _ 1	dLight1.3b	555.84
dLight1.3b _ 1	dLight1.3b	538.56
dLight1.3b _ 1	dLight1.3b	828
dLight1.3b _ 1	dLight1.3b	672.48
dLight1.3b _ 1	dLight1.3b	571.68
dLight1.3b _ 1	dLight1.3b	809.28
dLight1.3b _ 1	dLight1.3b	724.32
dLight1.3b _ 1	dLight1.3b	548.64
dLight1.3b _ 1	dLight1.3b	767.52
dLight1.3b _ 1	dLight1.3b	1474.56
dLight1.3b _ 1	dLight1.3b	1859.04
dLight1.3b _ 1	dLight1.3b	1447.2
dLight1.3b _ 1	dLight1.3b	918.72
dLight1.3b _ 1	dLight1.3b	406.08
dLight1.3b _ 1	dLight1.3b	394.56
dLight1.3b _ 1	dLight1.3b	637.92
dLight1.3b _ 1	dLight1.3b	426.24
dLight1.3b _ 1	dLight1.3b	527.04
dLight1.3b _ 1	dLight1.3b	643.68
dLight1.3b _ 1	dLight1.3b	1156.32
dLight1.3b _ 1	dLight1.3b	1422.72
dLight1.3b _ 1	dLight1.3b	387.36
dLight1.3b _ 1	dLight1.3b	758.88
dLight1.3b _ 1	dLight1.3b	662.4
dLight1.3b _ 1	dLight1.3b	524.16
dLight1.3b _ 1	dLight1.3b	1333.44
dLight1.3b _ 1	dLight1.3b	1625.76
dLight1.3b _ 1	dLight1.3b	1010.88
dLight1.3b _ 1	dLight1.3b	637.92
dLight1.3b _ 1	dLight1.3b	992.16
dLight1.3b _ 1	dLight1.3b	807.84
dLight1.3b _ 1	dLight1.3b	789.12
dLight1.3b _ 1	dLight1.3b	1048.32
dLight1.3b _ 1	dLight1.3b	1481.76
dLight1.3b _ 1	dLight1.3b	950.4
dLight1.3b _ 1	dLight1.3b	721.44
dLight1.3b _ 1	dLight1.3b	732.96
dLight1.3b _ 1	dLight1.3b	1877.76
dLight1.3b _ 1	dLight1.3b	982.08
dLight1.3b _ 1	dLight1.3b	1450.08
dLight1.3b _ 1	dLight1.3b	636.48
dLight1.3b _ 1	dLight1.3b	668.16
dLight1.3b _ 1	dLight1.3b	760.32
dLight1.3b _ 1	dLight1.3b	442.08
dLight1.3b _ 1	dLight1.3b	1054.08
dLight1.3b _ 1	dLight1.3b	1415.52
dLight1.3b _ 1	dLight1.3b	1121.76
dLight1.3b _ 1	dLight1.3b	936
dLight1.3b _ 1	dLight1.3b	365.76
dLight1.3b _ 1	dLight1.3b	917.28
dLight1.3b _ 1	dLight1.3b	593.28
dLight1.3b _ 1	dLight1.3b	732.96
dLight1.3b _ 1	dLight1.3b	367.2
dLight1.3b _ 1	dLight1.3b	865.44
dLight1.3b _ 1	dLight1.3b	767.52
dLight1.3b _ 1	dLight1.3b	388.8
dLight1.3b _ 1	dLight1.3b	948.96
dLight1.3b _ 1	dLight1.3b	457.92
dLight1.3b _ 1	dLight1.3b	689.76
dLight1.3b _ 1	dLight1.3b	1082.88
dLight1.3b _ 1	dLight1.3b	912.96
dLight1.3b _ 1	dLight1.3b	308.16
dLight1.3b _ 1	dLight1.3b	1592.64
dLight1.3b _ 1	dLight1.3b	724.32
dLight1.3b _ 1	dLight1.3b	914.4
dLight1.3b _ 1	dLight1.3b	1015.2
dLight1.3b _ 1	dLight1.3b	724.32
dLight1.3b _ 1	dLight1.3b	1457.28
dLight1.3b _ 1	dLight1.3b	947.52
dLight1.3b _ 1	dLight1.3b	895.68
dLight1.3b _ 1	dLight1.3b	600.48
dLight1.3b _ 1	dLight1.3b	2355.84
dLight1.3b _ 1	dLight1.3b	979.2
dLight1.3b _ 1	dLight1.3b	771.84
dLight1.3b _ 1	dLight1.3b	894.24
dLight1.3b _ 1	dLight1.3b	1386.72
dLight1.3b _ 1	dLight1.3b	943.2
dLight1.3b _ 1	dLight1.3b	2468.16
dLight1.3b _ 1	dLight1.3b	673.92
dLight1.3b _ 1	dLight1.3b	862.56
dLight1.3b _ 1	dLight1.3b	767.52
dLight1.3b _ 1	dLight1.3b	884.16
dLight1.3b _ 1	dLight1.3b	2008.8
dLight1.3b _ 1	dLight1.3b	718.56
dLight1.3b _ 1	dLight1.3b	197.28
dLight1.3b _ 1	dLight1.3b	781.92
dLight1.3b _ 1	dLight1.3b	1692
dLight1.3b _ 1	dLight1.3b	2288.16
dLight1.3b _ 1	dLight1.3b	2878.56
dLight1.3b _ 1	dLight1.3b	987.84
dLight1.3b _ 1	dLight1.3b	1509.12
dLight1.3b _ 1	dLight1.3b	872.64
dLight1.3b _ 1	dLight1.3b	632.16
dLight1.3b _ 1	dLight1.3b	629.28
dLight1.3b _ 1	dLight1.3b	846.72
dLight1.3b _ 1	dLight1.3b	1068.48
dLight1.3b _ 1	dLight1.3b	478.08
dLight1.3b _ 1	dLight1.3b	642.24
dLight1.3b _ 1	dLight1.3b	552.96
dLight1.3b _ 1	dLight1.3b	940.32
dLight1.3b _ 1	dLight1.3b	694.08
dLight1.3b _ 1	dLight1.3b	1414.08
dLight1.3b _ 1	dLight1.3b	950.4
dLight1.3b _ 1	dLight1.3b	718.56
dLight1.3b _ 1	dLight1.3b	754.56
dLight1.3b _ 1	dLight1.3b	172.8
dLight1.3b _ 1	dLight1.3b	614.88
dLight1.3b _ 1	dLight1.3b	594.72
dLight1.3b _ 1	dLight1.3b	1612.8
dLight1.3b _ 1	dLight1.3b	563.04
dLight1.3b _ 1	dLight1.3b	512.64
dLight1.3b _ 1	dLight1.3b	1719.36
dLight1.3b _ 1	dLight1.3b	1307.52
dLight1.3b _ 1	dLight1.3b	864
dLight1.3b _ 1	dLight1.3b	643.68
dLight1.3b _ 1	dLight1.3b	1707.84
dLight1.3b _ 1	dLight1.3b	397.44
dLight1.3b _ 1	dLight1.3b	989.28
dLight1.3b _ 1	dLight1.3b	1441.44
dLight1.3b _ 1	dLight1.3b	758.88
dLight1.3b _ 1	dLight1.3b	1101.6
dLight1.3b _ 1	dLight1.3b	983.52
dLight1.3b _ 1	dLight1.3b	688.32
dLight1.3b _ 1	dLight1.3b	830.88
dLight1.3b _ 1	dLight1.3b	1327.68
dLight1.3b _ 1	dLight1.3b	871.2
dLight1.3b _ 1	dLight1.3b	607.68
dLight1.3b _ 1	dLight1.3b	728.64
dLight1.3b _ 1	dLight1.3b	288
dLight1.3b _ 1	dLight1.3b	963.36
dLight1.3b _ 1	dLight1.3b	750.24
dLight1.3b _ 1	dLight1.3b	809.28
dLight1.3b _ 1	dLight1.3b	636.48
dLight1.3b _ 1	dLight1.3b	941.76
dLight1.3b _ 1	dLight1.3b	1497.6
dLight1.3b _ 1	dLight1.3b	495.36
dLight1.3b _ 1	dLight1.3b	768.96
dLight1.3b _ 1	dLight1.3b	851.04
dLight1.3b _ 1	dLight1.3b	599.04
dLight1.3b _ 1	dLight1.3b	528.48
dLight1.3b _ 1	dLight1.3b	1172.16
dLight1.3b _ 1	dLight1.3b	951.84
dLight1.3b _ 1	dLight1.3b	951.84
dLight1.3b _ 1	dLight1.3b	895.68
dLight1.3b _ 1	dLight1.3b	658.08
dLight1.3b _ 1	dLight1.3b	921.6
dLight1.3b _ 1	dLight1.3b	1486.08
dLight1.3b _ 1	dLight1.3b	1177.92
dLight1.3b _ 1	dLight1.3b	574.56
dLight1.3b _ 1	dLight1.3b	1152
dLight1.3b _ 1	dLight1.3b	767.52
dLight1.3b _ 1	dLight1.3b	516.96
dLight1.3b _ 1	dLight1.3b	1232.64
dLight1.3b _ 1	dLight1.3b	658.08
dLight1.3b _ 1	dLight1.3b	3965.76
dLight1.3b _ 1	dLight1.3b	506.88
dLight1.3b _ 1	dLight1.3b	793.44
dLight1.3b _ 1	dLight1.3b	830.88
dLight1.3b _ 1	dLight1.3b	725.76
dLight1.3b _ 1	dLight1.3b	792
dLight1.3b _ 1	dLight1.3b	639.36
dLight1.3b _ 1	dLight1.3b	756
dLight1.3b _ 1	dLight1.3b	1189.44
dLight1.3b _ 1	dLight1.3b	645.12
dLight1.3b _ 1	dLight1.3b	1228.32
dLight1.3b _ 1	dLight1.3b	555.84
dLight1.3b _ 1	dLight1.3b	1038.24
dLight1.3b _ 1	dLight1.3b	993.6
dLight1.3b _ 1	dLight1.3b	1320.48
dLight1.3b _ 1	dLight1.3b	1797.12
dLight1.3b _ 1	dLight1.3b	734.4
dLight1.3b _ 1	dLight1.3b	748.8
dLight1.3b _ 1	dLight1.3b	780.48
dLight1.3b _ 1	dLight1.3b	1141.92
dLight1.3b _ 1	dLight1.3b	436.32
dLight1.3b _ 1	dLight1.3b	1284.48
dLight1.3b _ 1	dLight1.3b	1267.2
dLight1.3b _ 1	dLight1.3b	1134.72
dLight1.3b _ 1	dLight1.3b	1199.52
dLight1.3b _ 1	dLight1.3b	887.04
dLight1.3b _ 1	dLight1.3b	840.96
dLight1.3b _ 1	dLight1.3b	550.08
dLight1.3b _ 1	dLight1.3b	925.92
dLight1.3b _ 1	dLight1.3b	807.84
dLight1.3b _ 1	dLight1.3b	348.48
dLight1.3b _ 1	dLight1.3b	751.68
dLight1.3b _ 1	dLight1.3b	538.56
dLight1.3b _ 1	dLight1.3b	802.08
dLight1.3b _ 1	dLight1.3b	993.6
dLight1.3b _ 1	dLight1.3b	531.36
dLight1.3b _ 1	dLight1.3b	1584
dLight1.3b _ 1	dLight1.3b	882.72
dLight1.3b _ 1	dLight1.3b	891.36
dLight1.3b _ 1	dLight1.3b	306.72
dLight1.3b _ 1	dLight1.3b	807.84
dLight1.3b _ 1	dLight1.3b	934.56
dLight1.3b _ 1	dLight1.3b	630.72
dLight1.3b _ 1	dLight1.3b	603.36
dLight1.3b _ 1	dLight1.3b	1251.36
dLight1.3b _ 1	dLight1.3b	584.64
dLight1.3b _ 1	dLight1.3b	1087.2
dLight1.3b _ 1	dLight1.3b	938.88
dLight1.3b _ 1	dLight1.3b	799.2
dLight1.3b _ 1	dLight1.3b	953.28
dLight1.3b _ 1	dLight1.3b	799.2
dLight1.3b _ 1	dLight1.3b	1008
dLight1.3b _ 1	dLight1.3b	1742.4
dLight1.3b _ 1	dLight1.3b	666.72
dLight1.3b _ 1	dLight1.3b	1035.36
dLight1.3b _ 1	dLight1.3b	620.64
dLight1.3b _ 1	dLight1.3b	2108.16
dLight1.3b _ 1	dLight1.3b	1291.68
dLight1.3b _ 1	dLight1.3b	668.16
dLight1.3b _ 1	dLight1.3b	452.16
dLight1.3b _ 1	dLight1.3b	796.32
dLight1.3b _ 1	dLight1.3b	3009.6
dLight1.3b _ 1	dLight1.3b	548.64
dLight1.3b _ 1	dLight1.3b	684
dLight1.3b _ 1	dLight1.3b	718.56
dLight1.3b _ 1	dLight1.3b	9689.76
dLight1.3b _ 1	dLight1.3b	666.72
dLight1.3b _ 1	dLight1.3b	1216.8
dLight1.3b _ 1	dLight1.3b	1029.6
dLight1.3b _ 1	dLight1.3b	1739.52
dLight1.3b _ 1	dLight1.3b	221.76
dLight1.3b _ 1	dLight1.3b	1025.28
dLight1.3b _ 1	dLight1.3b	1530.72
dLight1.3b _ 1	dLight1.3b	866.88
dLight1.3b _ 1	dLight1.3b	1117.44
dLight1.3b _ 1	dLight1.3b	650.88
dLight1.3b _ 1	dLight1.3b	743.04
dLight1.3b _ 1	dLight1.3b	995.04
dLight1.3b _ 1	dLight1.3b	809.28
dLight1.3b _ 1	dLight1.3b	1717.92
dLight1.3b _ 1	dLight1.3b	741.6
dLight1.3b _ 1	dLight1.3b	770.4
dLight1.3b _ 1	dLight1.3b	1247.04
dLight1.3b _ 1	dLight1.3b	557.28
dLight1.3b _ 1	dLight1.3b	2666.88
dLight1.3b _ 1	dLight1.3b	648
dLight1.3b _ 1	dLight1.3b	432
dLight1.3b _ 1	dLight1.3b	702.72
dLight1.3b _ 1	dLight1.3b	433.44
dLight1.3b _ 1	dLight1.3b	717.12
dLight1.3b _ 1	dLight1.3b	1617.12
dLight1.3b _ 1	dLight1.3b	514.08
dLight1.3b _ 1	dLight1.3b	1435.68
dLight1.3b _ 1	dLight1.3b	1172.16
dLight1.3b _ 1	dLight1.3b	403.2
dLight1.3b _ 1	dLight1.3b	1097.28
dLight1.3b _ 1	dLight1.3b	426.24
dLight1.3b _ 1	dLight1.3b	570.24
dLight1.3b _ 1	dLight1.3b	1879.2
dLight1.3b _ 1	dLight1.3b	1010.88
dLight1.3b _ 1	dLight1.3b	1807.2
dLight1.3b _ 1	dLight1.3b	923.04
dLight1.3b _ 1	dLight1.3b	1825.92
dLight1.3b _ 1	dLight1.3b	927.36
dLight1.3b _ 1	dLight1.3b	522.72
dLight1.3b _ 1	dLight1.3b	1235.52
dLight1.3b _ 1	dLight1.3b	74.88
dLight1.3b _ 1	dLight1.3b	623.52
dLight1.3b _ 1	dLight1.3b	1789.92
dLight1.3b _ 1	dLight1.3b	832.32
dLight1.3b _ 1	dLight1.3b	388.8
dLight1.3b _ 1	dLight1.3b	561.6
dLight1.3b _ 1	dLight1.3b	833.76
dLight1.3b _ 1	dLight1.3b	1421.28
dLight1.3b _ 1	dLight1.3b	1039.68
dLight1.3b _ 1	dLight1.3b	953.28
dLight1.3b _ 1	dLight1.3b	505.44
dLight1.3b _ 1	dLight1.3b	812.16
dLight1.3b _ 1	dLight1.3b	1105.92
dLight1.3b _ 1	dLight1.3b	447.84
dLight1.3b _ 1	dLight1.3b	923.04
dLight1.3b _ 1	dLight1.3b	977.76
dLight1.3b _ 1	dLight1.3b	889.92
dLight1.3b _ 1	dLight1.3b	3152.16
dLight1.3b _ 1	dLight1.3b	1114.56
dLight1.3b _ 1	dLight1.3b	764.64
dLight1.3b _ 1	dLight1.3b	825.12
dLight1.3b _ 1	dLight1.3b	1897.92
dLight1.3b _ 1	dLight1.3b	1029.6
dLight1.3b _ 1	dLight1.3b	2198.88
dLight1.3b _ 1	dLight1.3b	964.8
dLight1.3b _ 1	dLight1.3b	724.32
dLight1.3b _ 1	dLight1.3b	538.56
dLight1.3b _ 1	dLight1.3b	1293.12
dLight1.3b _ 1	dLight1.3b	2427.84
dLight1.3b _ 1	dLight1.3b	1081.44
dLight1.3b _ 1	dLight1.3b	871.2
dLight1.3b _ 1	dLight1.3b	1319.04
dLight1.3b _ 1	dLight1.3b	943.2
dLight1.3b _ 1	dLight1.3b	637.92
dLight1.3b _ 1	dLight1.3b	701.28
dLight1.3b _ 1	dLight1.3b	3297.6
dLight1.3b _ 1	dLight1.3b	852.48
dLight1.3b _ 1	dLight1.3b	833.76
dLight1.3b _ 1	dLight1.3b	632.16
dLight1.3b _ 1	dLight1.3b	1257.12
dLight1.3b _ 1	dLight1.3b	936
dLight1.3b _ 1	dLight1.3b	649.44
dLight1.3b _ 1	dLight1.3b	619.2
dLight1.3b _ 1	dLight1.3b	1159.2
dLight1.3b _ 1	dLight1.3b	655.2
dLight1.3b _ 1	dLight1.3b	809.28
dLight1.3b _ 1	dLight1.3b	3081.6
dLight1.3b _ 1	dLight1.3b	635.04
dLight1.3b _ 1	dLight1.3b	587.52
dLight1.3b _ 1	dLight1.3b	434.88
dLight1.3b _ 1	dLight1.3b	466.56
dLight1.3b _ 1	dLight1.3b	599.04
dLight1.3b _ 1	dLight1.3b	478.08
dLight1.3b _ 1	dLight1.3b	442.08
dLight1.3b _ 1	dLight1.3b	704.16
dLight1.3b _ 1	dLight1.3b	689.76
dLight1.3b _ 1	dLight1.3b	639.36
dLight1.3b _ 1	dLight1.3b	456.48
dLight1.3b _ 1	dLight1.3b	639.36
dLight1.3b _ 1	dLight1.3b	106.56
dLight1.3b _ 1	dLight1.3b	781.92
dLight1.3b _ 1	dLight1.3b	868.32
dLight1.3b _ 1	dLight1.3b	1468.8
dLight1.3b _ 1	dLight1.3b	839.52
dLight1.3b _ 1	dLight1.3b	888.48
dLight1.3b _ 1	dLight1.3b	1429.92
dLight1.3b _ 1	dLight1.3b	1526.4
dLight1.3b _ 1	dLight1.3b	505.44
dLight1.3b _ 1	dLight1.3b	754.56
dLight1.3b _ 1	dLight1.3b	938.88
dLight1.3b _ 1	dLight1.3b	699.84
dLight1.3b _ 1	dLight1.3b	1378.08
dLight1.3b _ 1	dLight1.3b	5670.72
dLight1.3b _ 1	dLight1.3b	1284.48
dLight1.3b _ 1	dLight1.3b	2017.44
dLight1.3b _ 1	dLight1.3b	606.24
dLight1.3b _ 1	dLight1.3b	2135.52
dLight1.3b _ 1	dLight1.3b	385.92
dLight1.3b _ 1	dLight1.3b	1179.36
dLight1.3b _ 1	dLight1.3b	1589.76
dLight1.3b _ 1	dLight1.3b	515.52
dLight1.3b _ 1	dLight1.3b	743.04
dLight1.3b _ 1	dLight1.3b	708.48
dLight1.3b _ 1	dLight1.3b	702.72
dLight1.3b _ 1	dLight1.3b	601.92
dLight1.3b _ 1	dLight1.3b	612
dLight1.3b _ 1	dLight1.3b	1006.56
dLight1.3b _ 1	dLight1.3b	1513.44
dLight1.3b _ 1	dLight1.3b	3117.6
dLight1.3b _ 1	dLight1.3b	439.2
dLight1.3b _ 1	dLight1.3b	195.84
dLight1.3b _ 1	dLight1.3b	858.24
dLight1.3b _ 1	dLight1.3b	599.04
dLight1.3b _ 1	dLight1.3b	403.2
dLight1.3b _ 1	dLight1.3b	744.48
dLight1.3b _ 1	dLight1.3b	599.04
dLight1.3b _ 1	dLight1.3b	813.6
dLight1.3b _ 1	dLight1.3b	6098.4
dLight1.3b _ 1	dLight1.3b	252
dLight1.3b _ 1	dLight1.3b	1111.68
dLight1.3b _ 1	dLight1.3b	1491.84
dLight1.3b _ 1	dLight1.3b	767.52
dLight1.3b _ 1	dLight1.3b	815.04
dLight1.3b _ 1	dLight1.3b	751.68
dLight1.3b _ 1	dLight1.3b	917.28
dLight1.3b _ 1	dLight1.3b	604.8
dLight1.3b _ 1	dLight1.3b	892.8
dLight1.3b _ 1	dLight1.3b	671.04
dLight1.3b _ 1	dLight1.3b	856.8
dLight1.3b _ 1	dLight1.3b	897.12
dLight1.3b _ 1	dLight1.3b	217.44
dLight1.3b _ 1	dLight1.3b	640.8
dLight1.3b _ 1	dLight1.3b	925.92
dLight1.3b _ 1	dLight1.3b	830.88
dLight1.3b _ 1	dLight1.3b	1051.2
dLight1.3b _ 1	dLight1.3b	691.2
dLight1.3b _ 1	dLight1.3b	437.76
dLight1.3b _ 1	dLight1.3b	578.88
dLight1.3b _ 1	dLight1.3b	681.12
dLight1.3b _ 1	dLight1.3b	825.12
dLight1.3b _ 1	dLight1.3b	515.52
dLight1.3b _ 1	dLight1.3b	852.48
dLight1.3b _ 1	dLight1.3b	1052.64
dLight1.3b _ 1	dLight1.3b	924.48
dLight1.3b _ 1	dLight1.3b	754.56
dLight1.3b _ 1	dLight1.3b	669.6
dLight1.3b _ 1	dLight1.3b	1124.64
dLight1.3b _ 1	dLight1.3b	754.56
dLight1.3b _ 1	dLight1.3b	1190.88
dLight1.3b _ 1	dLight1.3b	1054.08
dLight1.3b _ 1	dLight1.3b	1013.76
dLight1.3b _ 1	dLight1.3b	480.96
dLight1.3b _ 1	dLight1.3b	845.28
dLight1.3b _ 1	dLight1.3b	594.72
dLight1.3b _ 1	dLight1.3b	491.04
dLight1.3b _ 1	dLight1.3b	904.32
dLight1.3b _ 1	dLight1.3b	1314.72
dLight1.3b _ 1	dLight1.3b	508.32
dLight1.3b _ 1	dLight1.3b	1972.8
dLight1.3b _ 1	dLight1.3b	390.24
dLight1.3b _ 1	dLight1.3b	871.2
dLight1.3b _ 1	dLight1.3b	1293.12
dLight1.3b _ 1	dLight1.3b	249.12
dLight1.3b _ 1	dLight1.3b	1530.72
dLight1.3b _ 1	dLight1.3b	1660.32
dLight1.3b _ 1	dLight1.3b	1074.24
dLight1.3b _ 1	dLight1.3b	787.68
dLight1.3b _ 1	dLight1.3b	784.8
dLight1.3b _ 1	dLight1.3b	1137.6
dLight1.3b _ 1	dLight1.3b	1300.32
dLight1.3b _ 1	dLight1.3b	995.04
dLight1.3b _ 1	dLight1.3b	648
dLight1.3b _ 1	dLight1.3b	1363.68
dLight1.3b _ 1	dLight1.3b	540
dLight1.3b _ 1	dLight1.3b	577.44
dLight1.3b _ 1	dLight1.3b	783.36
dLight1.3b _ 1	dLight1.3b	506.88
dLight1.3b _ 1	dLight1.3b	800.64
dLight1.3b _ 1	dLight1.3b	819.36
dLight1.3b _ 1	dLight1.3b	933.12
dLight1.3b _ 1	dLight1.3b	1448.64
dLight1.3b _ 1	dLight1.3b	594.72
dLight1.3b _ 1	dLight1.3b	586.08
dLight1.3b _ 1	dLight1.3b	1284.48
dLight1.3b _ 1	dLight1.3b	1137.6
dLight1.3b _ 1	dLight1.3b	852.48
dLight1.3b _ 1	dLight1.3b	577.44
dLight1.3b _ 1	dLight1.3b	649.44
dLight1.3b _ 1	dLight1.3b	921.6
dLight1.3b _ 1	dLight1.3b	1008
dLight1.3b _ 1	dLight1.3b	1657.44
dLight1.3b _ 1	dLight1.3b	1283.04
dLight1.3b _ 1	dLight1.3b	485.28
dLight1.3b _ 1	dLight1.3b	973.44
dLight1.3b _ 1	dLight1.3b	563.04
dLight1.3b _ 1	dLight1.3b	629.28
dLight1.3b _ 1	dLight1.3b	907.2
dLight1.3b _ 1	dLight1.3b	1006.56
dLight1.3b _ 1	dLight1.3b	557.28
dLight1.3b _ 1	dLight1.3b	673.92
dLight1.3b _ 1	dLight1.3b	764.64
dLight1.3b _ 1	dLight1.3b	610.56
dLight1.3b _ 1	dLight1.3b	1486.08
dLight1.3b _ 1	dLight1.3b	3144.96
dLight1.3b _ 1	dLight1.3b	499.68
dLight1.3b _ 1	dLight1.3b	855.36
dLight1.3b _ 1	dLight1.3b	676.8
dLight1.3b _ 1	dLight1.3b	2780.64
dLight1.3b _ 1	dLight1.3b	568.8
dLight1.3b _ 1	dLight1.3b	1139.04
dLight1.3b _ 1	dLight1.3b	616.32
dLight1.3b _ 1	dLight1.3b	1504.8
dLight1.3b _ 1	dLight1.3b	1121.76
dLight1.3b _ 1	dLight1.3b	1175.04
dLight1.3b _ 1	dLight1.3b	874.08
dLight1.3b _ 1	dLight1.3b	898.56
dLight1.3b _ 1	dLight1.3b	302.4
dLight1.3b _ 1	dLight1.3b	763.2
dLight1.3b _ 1	dLight1.3b	1029.6
dLight1.3b _ 1	dLight1.3b	1100.16
dLight1.3b _ 1	dLight1.3b	1418.4
dLight1.3b _ 1	dLight1.3b	1372.32
dLight1.3b _ 1	dLight1.3b	338.4
dLight1.3b _ 1	dLight1.3b	846.72
dLight1.3b _ 1	dLight1.3b	570.24
dLight1.3b _ 1	dLight1.3b	900
dLight1.3b _ 1	dLight1.3b	1330.56
dLight1.3b _ 1	dLight1.3b	614.88
dLight1.3b _ 1	dLight1.3b	632.16
dLight1.3b _ 1	dLight1.3b	758.88
dLight1.3b _ 1	dLight1.3b	1539.36
dLight1.3b _ 1	dLight1.3b	2266.56
dLight1.3b _ 1	dLight1.3b	1203.84
dLight1.3b _ 1	dLight1.3b	767.52
dLight1.3b _ 1	dLight1.3b	823.68
dLight1.3b _ 1	dLight1.3b	645.12
dLight1.3b _ 1	dLight1.3b	1861.92
dLight1.3b _ 1	dLight1.3b	819.36
dLight1.3b _ 1	dLight1.3b	1509.12
dLight1.3b _ 1	dLight1.3b	776.16
dLight1.3b _ 1	dLight1.3b	895.68
dLight1.3b _ 1	dLight1.3b	1307.52
dLight1.3b _ 1	dLight1.3b	580.32
dLight1.3b _ 1	dLight1.3b	807.84
dLight1.3b _ 1	dLight1.3b	1074.24
dLight1.3b _ 1	dLight1.3b	708.48
dLight1.3b _ 1	dLight1.3b	636.48
dLight1.3b _ 1	dLight1.3b	711.36
dLight1.3b _ 1	dLight1.3b	809.28
dLight1.3b _ 1	dLight1.3b	1635.84
dLight1.3b _ 1	dLight1.3b	750.24
dLight1.3b _ 1	dLight1.3b	563.04
dLight1.3b _ 1	dLight1.3b	2155.68
dLight1.3b _ 1	dLight1.3b	1085.76
dLight1.3b _ 1	dLight1.3b	584.64
dLight1.3b _ 1	dLight1.3b	766.08
dLight1.3b _ 1	dLight1.3b	789.12
dLight1.3b _ 1	dLight1.3b	391.68
dLight1.3b _ 1	dLight1.3b	1275.84
dLight1.3b _ 1	dLight1.3b	751.68
dLight1.3b _ 1	dLight1.3b	2269.44
dLight1.3b _ 1	dLight1.3b	286.56
dLight1.3b _ 1	dLight1.3b	763.2
dLight1.3b _ 1	dLight1.3b	941.76
dLight1.3b _ 1	dLight1.3b	779.04
dLight1.3b _ 1	dLight1.3b	773.28
dLight1.3b _ 1	dLight1.3b	836.64
dLight1.3b _ 1	dLight1.3b	637.92
dLight1.3b _ 1	dLight1.3b	819.36
dLight1.3b _ 1	dLight1.3b	512.64
dLight1.3b _ 1	dLight1.3b	581.76
dLight1.3b _ 1	dLight1.3b	1002.24
dLight1.3b _ 1	dLight1.3b	421.92
dLight1.3b _ 1	dLight1.3b	813.6
dLight1.3b _ 1	dLight1.3b	809.28
dLight1.3b _ 1	dLight1.3b	1643.04
dLight1.3b _ 1	dLight1.3b	1015.2
dLight1.3b _ 1	dLight1.3b	721.44
dLight1.3b _ 1	dLight1.3b	1249.92
dLight1.3b _ 1	dLight1.3b	767.52
dLight1.3b _ 1	dLight1.3b	358.56
dLight1.3b _ 1	dLight1.3b	1202.4
dLight1.3b _ 1	dLight1.3b	953.28
dLight1.3b _ 1	dLight1.3b	318.24
dLight1.3b _ 1	dLight1.3b	574.56
dLight1.3b _ 1	dLight1.3b	963.36
dLight1.3b _ 1	dLight1.3b	665.28
dLight1.3b _ 1	dLight1.3b	609.12
dLight1.3b _ 1	dLight1.3b	1296
dLight1.3b _ 1	dLight1.3b	938.88
dLight1.3b _ 1	dLight1.3b	2426.4
dLight1.3b _ 1	dLight1.3b	1157.76
dLight1.3b _ 1	dLight1.3b	1519.2
dLight1.3b _ 1	dLight1.3b	1579.68
dLight1.3b _ 1	dLight1.3b	535.68
dLight1.3b _ 1	dLight1.3b	564.48
dLight1.3b _ 1	dLight1.3b	728.64
dLight1.3b _ 1	dLight1.3b	576
dLight1.3b _ 1	dLight1.3b	612
dLight1.3b _ 1	dLight1.3b	632.16
dLight1.3b _ 1	dLight1.3b	1062.72
dLight1.3b _ 1	dLight1.3b	712.8
dLight1.3b _ 1	dLight1.3b	1487.52
dLight1.3b _ 1	dLight1.3b	486.72
dLight1.3b _ 1	dLight1.3b	1108.8
dLight1.3b _ 1	dLight1.3b	820.8
dLight1.3b _ 1	dLight1.3b	902.88
dLight1.3b _ 1	dLight1.3b	735.84
dLight1.3b _ 1	dLight1.3b	607.68
dLight1.3b _ 1	dLight1.3b	856.8
dLight1.3b _ 1	dLight1.3b	1164.96
dLight1.3b _ 1	dLight1.3b	623.52
dLight1.3b _ 1	dLight1.3b	535.68
dLight1.3b _ 1	dLight1.3b	835.2
dLight1.3b _ 1	dLight1.3b	1078.56
dLight1.3b _ 1	dLight1.3b	580.32
dLight1.3b _ 1	dLight1.3b	828
dLight1.3b _ 1	dLight1.3b	449.28
dLight1.3b _ 1	dLight1.3b	692.64
dLight1.3b _ 1	dLight1.3b	675.36
dLight1.3b _ 1	dLight1.3b	790.56
dLight1.3b _ 1	dLight1.3b	613.44
dLight1.3b _ 1	dLight1.3b	705.6
dLight1.3b _ 1	dLight1.3b	699.84
dLight1.3b _ 1	dLight1.3b	603.36
dLight1.3b _ 1	dLight1.3b	655.2
dLight1.3b _ 1	dLight1.3b	637.92
dLight1.3b _ 1	dLight1.3b	826.56
dLight1.3b _ 1	dLight1.3b	1196.64
dLight1.3b _ 1	dLight1.3b	1212.48
dLight1.3b _ 1	dLight1.3b	573.12
dLight1.3b _ 1	dLight1.3b	1277.28
dLight1.3b _ 1	dLight1.3b	704.16
dLight1.3b _ 1	dLight1.3b	741.6
dLight1.3b _ 1	dLight1.3b	809.28
dLight1.3b _ 1	dLight1.3b	544.32
dLight1.3b _ 1	dLight1.3b	1657.44
dLight1.3b _ 1	dLight1.3b	663.84
dLight1.3b _ 1	dLight1.3b	823.68
dLight1.3b _ 1	dLight1.3b	2108.16
dLight1.3b _ 1	dLight1.3b	1117.44
dLight1.3b _ 1	dLight1.3b	400.32
dLight1.3b _ 1	dLight1.3b	740.16
dLight1.3b _ 1	dLight1.3b	640.8
dLight1.3b _ 1	dLight1.3b	731.52
dLight1.3b _ 1	dLight1.3b	888.48
dLight1.3b _ 1	dLight1.3b	1090.08
dLight1.3b _ 1	dLight1.3b	57.6
dLight1.3b _ 1	dLight1.3b	923.04
dLight1.3b _ 1	dLight1.3b	722.88
dLight1.3b _ 1	dLight1.3b	1380.96
dLight1.3b _ 1	dLight1.3b	1595.52
dLight1.3b _ 1	dLight1.3b	1036.8
dLight1.3b _ 1	dLight1.3b	982.08
dLight1.3b _ 1	dLight1.3b	2233.44
dLight1.3b _ 1	dLight1.3b	799.2
dLight1.3b _ 1	dLight1.3b	737.28
dLight1.3b _ 1	dLight1.3b	1117.44
dLight1.3b _ 1	dLight1.3b	1545.12
dLight1.3b _ 1	dLight1.3b	375.84
dLight1.3b _ 1	dLight1.3b	832.32
dLight1.3b _ 1	dLight1.3b	956.16
dLight1.3b _ 1	dLight1.3b	996.48
dLight1.3b _ 1	dLight1.3b	1431.36
dLight1.3b _ 1	dLight1.3b	804.96
dLight1.3b _ 1	dLight1.3b	1432.8
dLight1.3b _ 1	dLight1.3b	626.4
dLight1.3b _ 1	dLight1.3b	826.56
dLight1.3b _ 1	dLight1.3b	483.84
dLight1.3b _ 1	dLight1.3b	868.32
dLight1.3b _ 1	dLight1.3b	967.68
dLight1.3b _ 1	dLight1.3b	580.32
dLight1.3b _ 1	dLight1.3b	931.68
dLight1.3b _ 1	dLight1.3b	443.52
dLight1.3b _ 1	dLight1.3b	707.04
dLight1.3b _ 1	dLight1.3b	486.72
dLight1.3b _ 1	dLight1.3b	1882.08
dLight1.3b _ 1	dLight1.3b	1500.48
dLight1.3b _ 1	dLight1.3b	757.44
dLight1.3b _ 1	dLight1.3b	345.6
dLight1.3b _ 1	dLight1.3b	715.68
dLight1.3b _ 1	dLight1.3b	1213.92
dLight1.3b _ 1	dLight1.3b	1008
dLight1.3b _ 1	dLight1.3b	806.4
dLight1.3b _ 1	dLight1.3b	2329.92
dLight1.3b _ 1	dLight1.3b	1808.64
dLight1.3b _ 1	dLight1.3b	640.8
dLight1.3b _ 1	dLight1.3b	679.68
dLight1.3b _ 1	dLight1.3b	455.04
dLight1.3b _ 1	dLight1.3b	671.04
dLight1.3b _ 1	dLight1.3b	776.16
dLight1.3b _ 1	dLight1.3b	779.04
dLight1.3b _ 1	dLight1.3b	986.4
dLight1.3b _ 1	dLight1.3b	604.8
dLight1.3b _ 1	dLight1.3b	432
dLight1.3b _ 1	dLight1.3b	817.92
dLight1.3b _ 1	dLight1.3b	773.28
dLight1.3b _ 1	dLight1.3b	1591.2
dLight1.3b _ 1	dLight1.3b	545.76
dLight1.3b _ 1	dLight1.3b	865.44
dLight1.3b _ 1	dLight1.3b	551.52
dLight1.3b _ 1	dLight1.3b	2567.52
dLight1.3b _ 1	dLight1.3b	672.48
dLight1.3b _ 1	dLight1.3b	619.2
dLight1.3b _ 1	dLight1.3b	671.04
dLight1.3b _ 1	dLight1.3b	528.48
dLight1.3b _ 1	dLight1.3b	743.04
dLight1.3b _ 1	dLight1.3b	745.92
dLight1.3b _ 1	dLight1.3b	581.76
dLight1.3b _ 1	dLight1.3b	944.64
dLight1.3b _ 1	dLight1.3b	1045.44
dLight1.3b _ 1	dLight1.3b	632.16
dLight1.3b _ 1	dLight1.3b	832.32
dLight1.3b _ 1	dLight1.3b	802.08
dLight1.3b _ 1	dLight1.3b	1536.48
dLight1.3b _ 1	dLight1.3b	593.28
dLight1.3b _ 1	dLight1.3b	1130.4
dLight1.3b _ 1	dLight1.3b	2024.64
dLight1.3b _ 1	dLight1.3b	1915.2
dLight1.3b _ 1	dLight1.3b	457.92
dLight1.3b _ 1	dLight1.3b	745.92
dLight1.3b _ 1	dLight1.3b	616.32
dLight1.3b _ 1	dLight1.3b	642.24
dLight1.3b _ 1	dLight1.3b	864
dLight1.3b _ 1	dLight1.3b	1499.04
dLight1.3b _ 1	dLight1.3b	996.48
dLight1.3b _ 1	dLight1.3b	1177.92
dLight1.3b _ 1	dLight1.3b	819.36
dLight1.3b _ 1	dLight1.3b	709.92
dLight1.3b _ 1	dLight1.3b	540
dLight1.3b _ 1	dLight1.3b	1418.4
dLight1.3b _ 1	dLight1.3b	809.28
dLight1.3b _ 1	dLight1.3b	992.16
dLight1.3b _ 1	dLight1.3b	1474.56
dLight1.3b _ 1	dLight1.3b	936
dLight1.3b _ 1	dLight1.3b	439.2
dLight1.3b _ 1	dLight1.3b	809.28
dLight1.3b _ 1	dLight1.3b	1274.4
dLight1.3b _ 1	dLight1.3b	480.96
dLight1.3b _ 1	dLight1.3b	992.16
dLight1.3b _ 1	dLight1.3b	816.48
dLight1.3b _ 1	dLight1.3b	1604.16
dLight1.3b _ 1	dLight1.3b	1915.2
dLight1.3b _ 1	dLight1.3b	1150.56
dLight1.3b _ 1	dLight1.3b	717.12
dLight1.3b _ 1	dLight1.3b	815.04
dLight1.3b _ 1	dLight1.3b	901.44
dLight1.3b _ 1	dLight1.3b	601.92
dLight1.3b _ 1	dLight1.3b	645.12
dLight1.3b _ 1	dLight1.3b	663.84
dLight1.3b _ 1	dLight1.3b	1002.24
dLight1.3b _ 1	dLight1.3b	613.44
dLight1.3b _ 1	dLight1.3b	1320.48
dLight1.3b _ 1	dLight1.3b	1170.72
dLight1.3b _ 1	dLight1.3b	714.24
dLight1.3b _ 1	dLight1.3b	858.24
dLight1.3b _ 1	dLight1.3b	1306.08
dLight1.3b _ 1	dLight1.3b	799.2
dLight1.3b _ 1	dLight1.3b	597.6
dLight1.3b _ 1	dLight1.3b	1308.96
dLight1.3b _ 1	dLight1.3b	724.32
dLight1.3b _ 1	dLight1.3b	584.64
dLight1.3b _ 1	dLight1.3b	790.56
dLight1.3b _ 1	dLight1.3b	3516.48
dLight1.3b _ 1	dLight1.3b	587.52
dLight1.3b _ 1	dLight1.3b	528.48
dLight1.3b _ 1	dLight1.3b	594.72
dLight1.3b _ 1	dLight1.3b	920.16
dLight1.3b _ 1	dLight1.3b	961.92
dLight1.3b _ 1	dLight1.3b	881.28
dLight1.3b _ 1	dLight1.3b	1087.2
dLight1.3b _ 1	dLight1.3b	564.48
dLight1.3b _ 1	dLight1.3b	1645.92
dLight1.3b _ 1	dLight1.3b	673.92
dLight1.3b _ 1	dLight1.3b	907.2
dLight1.3b _ 1	dLight1.3b	652.32
dLight1.3b _ 1	dLight1.3b	699.84
dLight1.3b _ 1	dLight1.3b	1481.76
dLight1.3b _ 1	dLight1.3b	1046.88
dLight1.3b _ 1	dLight1.3b	792
dLight1.3b _ 1	dLight1.3b	1015.2
dLight1.3b _ 1	dLight1.3b	1216.8
dLight1.3b _ 1	dLight1.3b	1029.6
dLight1.3b _ 1	dLight1.3b	809.28
dLight1.3b _ 1	dLight1.3b	1199.52
dLight1.3b _ 1	dLight1.3b	879.84
dLight1.3b _ 1	dLight1.3b	1294.56
dLight1.3b _ 1	dLight1.3b	397.44
dLight1.3b _ 1	dLight1.3b	643.68
dLight1.3b _ 1	dLight1.3b	843.84
dLight1.3b _ 1	dLight1.3b	1015.2
dLight1.3b _ 1	dLight1.3b	702.72
dLight1.3b _ 1	dLight1.3b	839.52
dLight1.3b _ 1	dLight1.3b	747.36
dLight1.3b _ 1	dLight1.3b	532.8
dLight1.3b _ 1	dLight1.3b	959.04
dLight1.3b _ 1	dLight1.3b	516.96
dLight1.3b _ 1	dLight1.3b	476.64
dLight1.3b _ 1	dLight1.3b	948.96
dLight1.3b _ 1	dLight1.3b	1202.4
dLight1.3b _ 1	dLight1.3b	1032.48
dLight1.3b _ 1	dLight1.3b	302.4
dLight1.3b _ 1	dLight1.3b	1614.24
dLight1.3b _ 1	dLight1.3b	374.4
dLight1.3b _ 1	dLight1.3b	603.36
dLight1.3b _ 1	dLight1.3b	1090.08
dLight1.3b _ 1	dLight1.3b	1056.96
dLight1.3b _ 1	dLight1.3b	1203.84
dLight1.3b _ 1	dLight1.3b	730.08
dLight1.3b _ 1	dLight1.3b	1290.24
dLight1.3b _ 1	dLight1.3b	2014.56
dLight1.3b _ 1	dLight1.3b	1056.96
dLight1.3b _ 1	dLight1.3b	440.64
dLight1.3b _ 1	dLight1.3b	362.88
dLight1.3b _ 1	dLight1.3b	550.08
dLight1.3b _ 1	dLight1.3b	3201.12
dLight1.3b _ 1	dLight1.3b	720
dLight1.3b _ 1	dLight1.3b	660.96
dLight1.3b _ 1	dLight1.3b	735.84
dLight1.3b _ 1	dLight1.3b	1185.12
dLight1.3b _ 1	dLight1.3b	656.64
dLight1.3b _ 1	dLight1.3b	1850.4
dLight1.3b _ 1	dLight1.3b	727.2
dLight1.3b _ 1	dLight1.3b	927.36
dLight1.3b _ 1	dLight1.3b	1018.08
dLight1.3b _ 1	dLight1.3b	2183.04
dLight1.3b _ 1	dLight1.3b	509.76
dLight1.3b _ 1	dLight1.3b	698.4
dLight1.3b _ 1	dLight1.3b	1225.44
dLight1.3b _ 1	dLight1.3b	504
dLight1.3b _ 1	dLight1.3b	1380.96
dLight1.3b _ 1	dLight1.3b	972
dLight1.3b _ 1	dLight1.3b	1186.56
dLight1.3b _ 1	dLight1.3b	1967.04
dLight1.3b _ 1	dLight1.3b	2053.44
dLight1.3b _ 1	dLight1.3b	564.48
dLight1.3b _ 1	dLight1.3b	836.64
dLight1.3b _ 1	dLight1.3b	1955.52
dLight1.3b _ 1	dLight1.3b	545.76
dLight1.3b _ 1	dLight1.3b	3284.64
dLight1.3b _ 1	dLight1.3b	2414.88
dLight1.3b _ 1	dLight1.3b	852.48
dLight1.3b _ 1	dLight1.3b	1025.28
dLight1.3b _ 1	dLight1.3b	669.6
dLight1.3b _ 1	dLight1.3b	61.92
dLight1.3b _ 1	dLight1.3b	152.64
dLight1.3b _ 1	dLight1.3b	921.6
dLight1.3b _ 1	dLight1.3b	511.2
dLight1.3b _ 1	dLight1.3b	2016
dLight1.3b _ 1	dLight1.3b	1205.28
dLight1.3b _ 1	dLight1.3b	1360.8
dLight1.3b _ 1	dLight1.3b	3294.72
dLight1.3b _ 1	dLight1.3b	930.24
dLight1.3b _ 1	dLight1.3b	840.96
dLight1.3b _ 1	dLight1.3b	594.72
dLight1.3b _ 1	dLight1.3b	941.76
dLight1.3b _ 1	dLight1.3b	840.96
dLight1.3b _ 1	dLight1.3b	997.92
dLight1.3b _ 1	dLight1.3b	937.44
dLight1.3b _ 1	dLight1.3b	1130.4
dLight1.3b _ 1	dLight1.3b	508.32
dLight1.3b _ 1	dLight1.3b	2268
dLight1.3b _ 1	dLight1.3b	397.44
dLight1.3b _ 1	dLight1.3b	542.88
dLight1.3b _ 1	dLight1.3b	656.64
dLight1.3b _ 1	dLight1.3b	2027.52
dLight1.3b _ 1	dLight1.3b	2383.2
dLight1.3b _ 1	dLight1.3b	1319.04
dLight1.3b _ 1	dLight1.3b	532.8
dLight1.3b _ 1	dLight1.3b	1278.72
dLight1.3b _ 1	dLight1.3b	704.16
dLight1.3b _ 1	dLight1.3b	3712.32
dLight1.3b _ 1	dLight1.3b	884.16
dLight1.3b _ 1	dLight1.3b	587.52
dLight1.3b _ 1	dLight1.3b	708.48
dLight1.3b _ 1	dLight1.3b	590.4
dLight1.3b _ 1	dLight1.3b	694.08
dLight1.3b _ 1	dLight1.3b	720
dLight1.3b _ 1	dLight1.3b	655.2
dLight1.3b _ 1	dLight1.3b	577.44
dLight1.3b _ 1	dLight1.3b	1347.84
dLight1.3b _ 1	dLight1.3b	1126.08
dLight1.3b _ 1	dLight1.3b	702.72
dLight1.3b _ 1	dLight1.3b	538.56
dLight1.3b _ 1	dLight1.3b	1332
dLight1.3b _ 1	dLight1.3b	1673.28
dLight1.3b _ 1	dLight1.3b	704.16
dLight1.3b _ 1	dLight1.3b	624.96
dLight1.3b _ 1	dLight1.3b	688.32
dLight1.3b _ 1	dLight1.3b	1094.4
dLight1.3b _ 1	dLight1.3b	780.48
dLight1.3b _ 1	dLight1.3b	812.16
dLight1.3b _ 1	dLight1.3b	1094.4
dLight1.3b _ 1	dLight1.3b	639.36
dLight1.3b _ 1	dLight1.3b	846.72
dLight1.3b _ 1	dLight1.3b	1791.36
dLight1.3b _ 1	dLight1.3b	591.84
dLight1.3b _ 1	dLight1.3b	781.92
dLight1.3b _ 1	dLight1.3b	624.96
dLight1.3b _ 1	dLight1.3b	1200.96
dLight1.3b _ 1	dLight1.3b	751.68
dLight1.3b _ 1	dLight1.3b	470.88
dLight1.3b _ 1	dLight1.3b	1182.24
dLight1.3b _ 1	dLight1.3b	1175.04
dLight1.3b _ 1	dLight1.3b	529.92
dLight1.3b _ 1	dLight1.3b	535.68
dLight1.3b _ 1	dLight1.3b	731.52
dLight1.3b _ 1	dLight1.3b	1785.6
dLight1.3b _ 1	dLight1.3b	576
dLight1.3b _ 1	dLight1.3b	1216.8
dLight1.3b _ 1	dLight1.3b	511.2
dLight1.3b _ 1	dLight1.3b	655.2
dLight1.3b _ 1	dLight1.3b	620.64
dLight1.3b _ 1	dLight1.3b	1028.16
dLight1.3b _ 1	dLight1.3b	731.52
dLight1.3b _ 1	dLight1.3b	688.32
dLight1.3b _ 1	dLight1.3b	276.48
dLight1.3b _ 1	dLight1.3b	887.04
dLight1.3b _ 1	dLight1.3b	915.84
dLight1.3b _ 1	dLight1.3b	950.4
dLight1.3b _ 1	dLight1.3b	915.84
dLight1.3b _ 1	dLight1.3b	457.92
dLight1.3b _ 1	dLight1.3b	839.52
dLight1.3b _ 1	dLight1.3b	779.04
dLight1.3b _ 1	dLight1.3b	1627.2
dLight1.3b _ 1	dLight1.3b	933.12
dLight1.3b _ 1	dLight1.3b	1012.32
dLight1.3b _ 1	dLight1.3b	1111.68
dLight1.3b _ 1	dLight1.3b	1000.8
dLight1.3b _ 1	dLight1.3b	419.04
dLight1.3b _ 1	dLight1.3b	305.28
dLight1.3b _ 1	dLight1.3b	845.28
dLight1.3b _ 1	dLight1.3b	491.04
dLight1.3b _ 1	dLight1.3b	1039.68
dLight1.3b _ 1	dLight1.3b	443.52
dLight1.3b _ 1	dLight1.3b	754.56
dLight1.3b _ 1	dLight1.3b	1044
dLight1.3b _ 1	dLight1.3b	849.6
dLight1.3b _ 1	dLight1.3b	659.52
dLight1.3b _ 1	dLight1.3b	531.36
dLight1.3b _ 1	dLight1.3b	1147.68
dLight1.3b _ 1	dLight1.3b	637.92
dLight1.3b _ 1	dLight1.3b	1188
dLight1.3b _ 1	dLight1.3b	921.6
dLight1.3b _ 1	dLight1.3b	666.72
dLight1.3b _ 1	dLight1.3b	1337.76
dLight1.3b _ 1	dLight1.3b	1409.76
dLight1.3b _ 1	dLight1.3b	610.56
dLight1.3b _ 1	dLight1.3b	577.44
dLight1.3b _ 1	dLight1.3b	1143.36
dLight1.3b _ 1	dLight1.3b	1720.8
dLight1.3b _ 1	dLight1.3b	407.52
dLight1.3b _ 1	dLight1.3b	1149.12
dLight1.3b _ 1	dLight1.3b	468
dLight1.3b _ 1	dLight1.3b	745.92
dLight1.3b _ 1	dLight1.3b	385.92
dLight1.3b _ 1	dLight1.3b	879.84
dLight1.3b _ 1	dLight1.3b	753.12
dLight1.3b _ 1	dLight1.3b	763.2
dLight1.3b _ 1	dLight1.3b	999.36
dLight1.3b _ 1	dLight1.3b	506.88
dLight1.3b _ 1	dLight1.3b	475.2
dLight1.3b _ 1	dLight1.3b	1965.6
dLight1.3b _ 1	dLight1.3b	1234.08
dLight1.3b _ 1	dLight1.3b	570.24
dLight1.3b _ 1	dLight1.3b	822.24
dLight1.3b _ 1	dLight1.3b	1071.36
dLight1.3b _ 1	dLight1.3b	776.16
dLight1.3b _ 1	dLight1.3b	1692
dLight1.3b _ 1	dLight1.3b	527.04
dLight1.3b _ 1	dLight1.3b	862.56
dLight1.3b _ 1	dLight1.3b	927.36
dLight1.3b _ 1	dLight1.3b	604.8
dLight1.3b _ 1	dLight1.3b	378.72
dLight1.3b _ 1	dLight1.3b	383.04
dLight1.3b _ 1	dLight1.3b	1118.88
dLight1.3b _ 1	dLight1.3b	306.72
dLight1.3b _ 1	dLight1.3b	1445.76
dLight1.3b _ 1	dLight1.3b	404.64
dLight1.3b _ 1	dLight1.3b	506.88
dLight1.3b _ 1	dLight1.3b	835.2
dLight1.3b _ 1	dLight1.3b	1548
dLight1.3b _ 1	dLight1.3b	954.72
dLight1.3b _ 1	dLight1.3b	506.88
dLight1.3b _ 1	dLight1.3b	623.52
dLight1.3b _ 1	dLight1.3b	2476.8
dLight1.3b _ 1	dLight1.3b	722.88
dLight1.3b _ 1	dLight1.3b	936
dLight1.3b _ 1	dLight1.3b	1681.92
dLight1.3b _ 1	dLight1.3b	531.36
dLight1.3b _ 1	dLight1.3b	1019.52
dLight1.3b _ 1	dLight1.3b	689.76
dLight1.3b _ 1	dLight1.3b	601.92
dLight1.3b _ 1	dLight1.3b	936
dLight1.3b _ 1	dLight1.3b	642.24
dLight1.3b _ 1	dLight1.3b	696.96
dLight1.3b _ 1	dLight1.3b	476.64
dLight1.3b _ 1	dLight1.3b	692.64
dLight1.3b _ 1	dLight1.3b	783.36
dLight1.3b _ 1	dLight1.3b	1172.16
dLight1.3b _ 1	dLight1.3b	1360.8
dLight1.3b _ 1	dLight1.3b	580.32
dLight1.3b _ 1	dLight1.3b	1303.2
dLight1.3b _ 1	dLight1.3b	902.88
dLight1.3b _ 1	dLight1.3b	1092.96
dLight1.3b _ 1	dLight1.3b	469.44
dLight1.3b _ 1	dLight1.3b	1025.28
dLight1.3b _ 1	dLight1.3b	914.4
dLight1.3b _ 1	dLight1.3b	658.08
dLight1.3b _ 1	dLight1.3b	120.96
dLight1.3b _ 1	dLight1.3b	599.04
dLight1.3b _ 1	dLight1.3b	658.08
dLight1.3b _ 1	dLight1.3b	833.76
dLight1.3b _ 1	dLight1.3b	531.36
dLight1.3b _ 1	dLight1.3b	619.2
dLight1.3b _ 1	dLight1.3b	502.56
dLight1.3b _ 1	dLight1.3b	37.44
dLight1.3b _ 1	dLight1.3b	917.28
dLight1.3b _ 1	dLight1.3b	737.28
dLight1.3b _ 1	dLight1.3b	1562.4
dLight1.3b _ 1	dLight1.3b	1584
dLight1.3b _ 1	dLight1.3b	712.8
dLight1.3b _ 1	dLight1.3b	1471.68
dLight1.3b _ 1	dLight1.3b	1336.32
dLight1.3b _ 1	dLight1.3b	777.6
dLight1.3b _ 1	dLight1.3b	1166.4
dLight1.3b _ 1	dLight1.3b	1438.56
dLight1.3b _ 1	dLight1.3b	961.92
dLight1.3b _ 1	dLight1.3b	819.36
dLight1.3b _ 1	dLight1.3b	554.4
dLight1.3b _ 1	dLight1.3b	436.32
dLight1.3b _ 1	dLight1.3b	686.88
dLight1.3b _ 1	dLight1.3b	645.12
dLight1.3b _ 1	dLight1.3b	1316.16
dLight1.3b _ 1	dLight1.3b	548.64
dLight1.3b _ 1	dLight1.3b	1969.92
dLight1.3b _ 1	dLight1.3b	862.56
dLight1.3b _ 1	dLight1.3b	515.52
dLight1.3b _ 1	dLight1.3b	812.16
dLight1.3b _ 1	dLight1.3b	734.4
dLight1.3b _ 1	dLight1.3b	1311.84
dLight1.3b _ 1	dLight1.3b	1355.04
dLight1.3b _ 1	dLight1.3b	122.4
dLight1.3b _ 1	dLight1.3b	1015.2
dLight1.3b _ 1	dLight1.3b	1591.2
dLight1.3b _ 1	dLight1.3b	1306.08
dLight1.3b _ 1	dLight1.3b	349.92
dLight1.3b _ 1	dLight1.3b	689.76
dLight1.3b _ 1	dLight1.3b	570.24
dLight1.3b _ 1	dLight1.3b	699.84
dLight1.3b _ 1	dLight1.3b	1081.44
dLight1.3b _ 1	dLight1.3b	622.08
dLight1.3b _ 1	dLight1.3b	946.08
dLight1.3b _ 1	dLight1.3b	889.92
dLight1.3b _ 1	dLight1.3b	361.44
dLight1.3b _ 1	dLight1.3b	1146.24
dLight1.3b _ 1	dLight1.3b	580.32
dLight1.3b _ 1	dLight1.3b	973.44
dLight1.3b _ 1	dLight1.3b	826.56
dLight1.3b _ 1	dLight1.3b	2689.92
dLight1.3b _ 1	dLight1.3b	807.84
dLight1.3b _ 1	dLight1.3b	1026.72
dLight1.3b _ 1	dLight1.3b	702.72
dLight1.3b _ 1	dLight1.3b	416.16
dLight1.3b _ 1	dLight1.3b	535.68
dLight1.3b _ 1	dLight1.3b	871.2
dLight1.3b _ 1	dLight1.3b	872.64
dLight1.3b _ 1	dLight1.3b	565.92
dLight1.3b _ 1	dLight1.3b	437.76
dLight1.3b _ 1	dLight1.3b	846.72
dLight1.3b _ 1	dLight1.3b	502.56
dLight1.3b _ 1	dLight1.3b	586.08
dLight1.3b _ 1	dLight1.3b	698.4
dLight1.3b _ 1	dLight1.3b	1101.6
dLight1.3b _ 1	dLight1.3b	655.2
dLight1.3b _ 1	dLight1.3b	285.12
dLight1.3b _ 1	dLight1.3b	787.68
dLight1.3b _ 1	dLight1.3b	554.4
dLight1.3b _ 1	dLight1.3b	1372.32
dLight1.3b _ 1	dLight1.3b	725.76
dLight1.3b _ 1	dLight1.3b	862.56
dLight1.3b _ 1	dLight1.3b	656.64
dLight1.3b _ 1	dLight1.3b	564.48
dLight1.3b _ 1	dLight1.3b	627.84
dLight1.3b _ 1	dLight1.3b	852.48
dLight1.3b _ 1	dLight1.3b	1200.96
dLight1.3b _ 1	dLight1.3b	871.2
dLight1.3b _ 1	dLight1.3b	488.16
dLight1.3b _ 1	dLight1.3b	502.56
dLight1.3b _ 1	dLight1.3b	748.8
dLight1.3b _ 1	dLight1.3b	3087.36
dLight1.3b _ 1	dLight1.3b	984.96
dLight1.3b _ 1	dLight1.3b	1117.44
dLight1.3b _ 1	dLight1.3b	501.12
dLight1.3b _ 1	dLight1.3b	681.12
dLight1.3b _ 1	dLight1.3b	678.24
dLight1.3b _ 1	dLight1.3b	388.8
dLight1.3b _ 1	dLight1.3b	659.52
dLight1.3b _ 1	dLight1.3b	986.4
dLight1.3b _ 1	dLight1.3b	432
dLight1.3b _ 1	dLight1.3b	819.36
dLight1.3b _ 1	dLight1.3b	573.12
dLight1.3b _ 1	dLight1.3b	878.4
dLight1.3b _ 1	dLight1.3b	673.92
dLight1.3b _ 1	dLight1.3b	743.04
dLight1.3b _ 1	dLight1.3b	514.08
dLight1.3b _ 1	dLight1.3b	835.2
dLight1.3b _ 1	dLight1.3b	1434.24
dLight1.3b _ 1	dLight1.3b	696.96
dLight1.3b _ 1	dLight1.3b	1090.08
dLight1.3b _ 1	dLight1.3b	560.16
dLight1.3b _ 1	dLight1.3b	887.04
dLight1.3b _ 1	dLight1.3b	1064.16
dLight1.3b _ 1	dLight1.3b	522.72
dLight1.3b _ 1	dLight1.3b	2370.24
dLight1.3b _ 1	dLight1.3b	609.12
dLight1.3b _ 1	dLight1.3b	992.16
dLight1.3b _ 1	dLight1.3b	1447.2
dLight1.3b _ 1	dLight1.3b	861.12
dLight1.3b _ 1	dLight1.3b	1211.04
dLight1.3b _ 1	dLight1.3b	671.04
dLight1.3b _ 1	dLight1.3b	740.16
dLight1.3b _ 1	dLight1.3b	1131.84
dLight1.3b _ 1	dLight1.3b	678.24
dLight1.3b _ 1	dLight1.3b	983.52
dLight1.3b _ 1	dLight1.3b	1016.64
dLight1.3b _ 1	dLight1.3b	839.52
dLight1.3b _ 1	dLight1.3b	815.04
dLight1.3b _ 1	dLight1.3b	2021.76
dLight1.3b _ 1	dLight1.3b	845.28
dLight1.3b _ 1	dLight1.3b	567.36
dLight1.3b _ 1	dLight1.3b	869.76
dLight1.3b _ 1	dLight1.3b	1696.32
dLight1.3b _ 1	dLight1.3b	499.68
dLight1.3b _ 1	dLight1.3b	2086.56
dLight1.3b _ 1	dLight1.3b	1006.56
dLight1.3b _ 1	dLight1.3b	1631.52
dLight1.3b _ 1	dLight1.3b	525.6
dLight1.3b _ 1	dLight1.3b	3826.08
dLight1.3b _ 1	dLight1.3b	492.48
dLight1.3b _ 1	dLight1.3b	2705.76
dLight1.3b _ 1	dLight1.3b	790.56
dLight1.3b _ 1	dLight1.3b	865.44
dLight1.3b _ 1	dLight1.3b	663.84
dLight1.3b _ 1	dLight1.3b	1656
dLight1.3b _ 1	dLight1.3b	391.68
dLight1.3b _ 1	dLight1.3b	790.56
dLight1.3b _ 1	dLight1.3b	1019.52
dLight1.3b _ 1	dLight1.3b	453.6
dLight1.3b _ 1	dLight1.3b	639.36
dLight1.3b _ 1	dLight1.3b	918.72
dLight1.3b _ 1	dLight1.3b	1356.48
dLight1.3b _ 1	dLight1.3b	485.28
dLight1.3b _ 1	dLight1.3b	135.36
dLight1.3b _ 1	dLight1.3b	840.96
dLight1.3b _ 1	dLight1.3b	865.44
dLight1.3b _ 1	dLight1.3b	766.08
dLight1.3b _ 1	dLight1.3b	721.44
dLight1.3b _ 1	dLight1.3b	665.28
dLight1.3b _ 1	dLight1.3b	1090.08
dLight1.3b _ 1	dLight1.3b	519.84
dLight1.3b _ 1	dLight1.3b	1811.52
dLight1.3b _ 1	dLight1.3b	753.12
dLight1.3b _ 1	dLight1.3b	1401.12
dLight1.3b _ 1	dLight1.3b	910.08
dLight1.3b _ 1	dLight1.3b	355.68
dLight1.3b _ 1	dLight1.3b	682.56
dLight1.3b _ 1	dLight1.3b	959.04
dLight1.3b _ 1	dLight1.3b	1686.24
dLight1.3b _ 1	dLight1.3b	671.04
dLight1.3b _ 1	dLight1.3b	624.96
dLight1.3b _ 1	dLight1.3b	1231.2
dLight1.3b _ 1	dLight1.3b	825.12
dLight1.3b _ 1	dLight1.3b	570.24
dLight1.3b _ 1	dLight1.3b	668.16
dLight1.3b _ 1	dLight1.3b	2410.56
dLight1.3b _ 1	dLight1.3b	1028.16
dLight1.3b _ 1	dLight1.3b	452.16
dLight1.3b _ 1	dLight1.3b	609.12
dLight1.3b _ 1	dLight1.3b	587.52
dLight1.3b _ 1	dLight1.3b	794.88
dLight1.3b _ 1	dLight1.3b	466.56
dLight1.3b _ 1	dLight1.3b	721.44
dLight1.3b _ 1	dLight1.3b	610.56
dLight1.3b _ 1	dLight1.3b	554.4
dLight1.3b _ 1	dLight1.3b	1045.44
dLight1.3b _ 1	dLight1.3b	987.84
dLight1.3b _ 1	dLight1.3b	1316.16
dLight1.3b _ 1	dLight1.3b	1683.36
dLight1.3b _ 1	dLight1.3b	1501.92
dLight1.3b _ 1	dLight1.3b	730.08
dLight1.3b _ 1	dLight1.3b	888.48
dLight1.3b _ 1	dLight1.3b	822.24
dLight1.3b _ 1	dLight1.3b	1349.28
dLight1.3b _ 1	dLight1.3b	1334.88
dLight1.3b _ 1	dLight1.3b	1224
dLight1.3b _ 1	dLight1.3b	720
dLight1.3b _ 1	dLight1.3b	630.72
dLight1.3b _ 1	dLight1.3b	1333.44
dLight1.3b _ 1	dLight1.3b	815.04
dLight1.3b _ 1	dLight1.3b	717.12
dLight1.3b _ 1	dLight1.3b	747.36
dLight1.3b _ 1	dLight1.3b	545.76
dLight1.3b _ 1	dLight1.3b	669.6
dLight1.3b _ 1	dLight1.3b	577.44
dLight1.3b _ 1	dLight1.3b	574.56
dLight1.3b _ 1	dLight1.3b	439.2
dLight1.3b _ 1	dLight1.3b	885.6
dLight1.3b _ 1	dLight1.3b	1725.12
dLight1.3b _ 1	dLight1.3b	976.32
dLight1.3b _ 1	dLight1.3b	943.2
dLight1.3b _ 1	dLight1.3b	1585.44
dLight1.3b _ 1	dLight1.3b	2154.24
dLight1.3b _ 1	dLight1.3b	501.12
dLight1.3b _ 1	dLight1.3b	1668.96
dLight1.3b _ 1	dLight1.3b	1288.8
dLight1.3b _ 1	dLight1.3b	732.96
dLight1.3b _ 1	dLight1.3b	977.76
dLight1.3b _ 1	dLight1.3b	815.04
dLight1.3b _ 1	dLight1.3b	744.48
dLight1.3b _ 1	dLight1.3b	1128.96
dLight1.3b _ 1	dLight1.3b	4736.16
dLight1.3b _ 1	dLight1.3b	211.68
dLight1.3b _ 1	dLight1.3b	639.36
dLight1.3b _ 1	dLight1.3b	508.32
dLight1.3b _ 1	dLight1.3b	993.6
dLight1.3b _ 1	dLight1.3b	969.12
dLight1.3b _ 1	dLight1.3b	583.2
dLight1.3b _ 1	dLight1.3b	645.12
dLight1.3b _ 1	dLight1.3b	1031.04
dLight1.3b _ 1	dLight1.3b	460.8
dLight1.3b _ 1	dLight1.3b	1164.96
dLight1.3b _ 1	dLight1.3b	604.8
dLight1.3b _ 1	dLight1.3b	833.76
dLight1.3b _ 1	dLight1.3b	547.2
dLight1.3b _ 1	dLight1.3b	174.24
dLight1.3b _ 1	dLight1.3b	597.6
dLight1.3b _ 1	dLight1.3b	290.88
dLight1.3b _ 1	dLight1.3b	987.84
dLight1.3b _ 1	dLight1.3b	1224
dLight1.3b _ 1	dLight1.3b	1035.36
dLight1.3b _ 1	dLight1.3b	1069.92
dLight1.3b _ 1	dLight1.3b	662.4
dLight1.3b _ 1	dLight1.3b	1764
dLight1.3b _ 1	dLight1.3b	554.4
dLight1.3b _ 1	dLight1.3b	807.84
dLight1.3b _ 1	dLight1.3b	364.32
dLight1.3b _ 1	dLight1.3b	547.2
dLight1.3b _ 1	dLight1.3b	1542.24
dLight1.3b _ 1	dLight1.3b	701.28
dLight1.3b _ 1	dLight1.3b	1425.6
dLight1.3b _ 1	dLight1.3b	3350.88
dLight1.3b _ 1	dLight1.3b	1530.72
dLight1.3b _ 1	dLight1.3b	594.72
dLight1.3b _ 1	dLight1.3b	1092.96
dLight1.3b _ 1	dLight1.3b	953.28
dLight1.3b _ 1	dLight1.3b	610.56
dLight1.3b _ 1	dLight1.3b	339.84
dLight1.3b _ 1	dLight1.3b	793.44
dLight1.3b _ 1	dLight1.3b	839.52
dLight1.3b _ 1	dLight1.3b	908.64
dLight1.3b _ 1	dLight1.3b	336.96
dLight1.3b _ 1	dLight1.3b	773.28
dLight1.3b _ 1	dLight1.3b	600.48
dLight1.3b _ 1	dLight1.3b	1235.52
dLight1.3b _ 1	dLight1.3b	1160.64
dLight1.3b _ 1	dLight1.3b	439.2
dLight1.3b _ 1	dLight1.3b	731.52
dLight1.3b _ 1	dLight1.3b	2210.4
dLight1.3b _ 1	dLight1.3b	2018.88
dLight1.3b _ 1	dLight1.3b	4556.16
dLight1.3b _ 1	dLight1.3b	1297.44
dLight1.3b _ 1	dLight1.3b	2557.44
dLight1.3b _ 1	dLight1.3b	466.56
dLight1.3b _ 1	dLight1.3b	534.24
dLight1.3b _ 1	dLight1.3b	838.08
dLight1.3b _ 1	dLight1.3b	934.56
dLight1.3b _ 1	dLight1.3b	1213.92
dLight1.3b _ 1	dLight1.3b	908.64
dLight1.3b _ 1	dLight1.3b	2213.28
dLight1.3b _ 1	dLight1.3b	3512.16
dLight1.3b _ 1	dLight1.3b	1136.16
dLight1.3b _ 1	dLight1.3b	498.24
dLight1.3b _ 1	dLight1.3b	848.16
dLight1.3b _ 1	dLight1.3b	1067.04
dLight1.3b _ 1	dLight1.3b	861.12
dLight1.3b _ 1	dLight1.3b	478.08
dLight1.3b _ 1	dLight1.3b	1082.88
dLight1.3b _ 1	dLight1.3b	659.52
dLight1.3b _ 1	dLight1.3b	5495.04
dLight1.3b _ 1	dLight1.3b	1258.56
dLight1.3b _ 1	dLight1.3b	832.32
dLight1.3b _ 1	dLight1.3b	858.24
dLight1.3b _ 1	dLight1.3b	247.68
dLight1.3b _ 1	dLight1.3b	195.84
dLight1.3b _ 1	dLight1.3b	1033.92
dLight1.3b _ 1	dLight1.3b	1265.76
dLight1.3b _ 1	dLight1.3b	846.72
dLight1.3b _ 1	dLight1.3b	751.68
dLight1.3b _ 1	dLight1.3b	606.24
dLight1.3b _ 1	dLight1.3b	646.56
dLight1.3b _ 1	dLight1.3b	2496.96
dLight1.3b _ 1	dLight1.3b	1006.56
dLight1.3b _ 1	dLight1.3b	741.6
dLight1.3b _ 1	dLight1.3b	1087.2
dLight1.3b _ 1	dLight1.3b	1071.36
dLight1.3b _ 1	dLight1.3b	2214.72
dLight1.3b _ 1	dLight1.3b	868.32
dLight1.3b _ 1	dLight1.3b	604.8
dLight1.3b _ 1	dLight1.3b	712.8
dLight1.3b _ 1	dLight1.3b	1062.72
dLight1.3b _ 1	dLight1.3b	1044
dLight1.3b _ 1	dLight1.3b	658.08
dLight1.3b _ 1	dLight1.3b	478.08
dLight1.3b _ 1	dLight1.3b	1157.76
dLight1.3b _ 1	dLight1.3b	987.84
dLight1.3b _ 1	dLight1.3b	305.28
dLight1.3b _ 1	dLight1.3b	866.88
dLight1.3b _ 1	dLight1.3b	394.56
dLight1.3b _ 1	dLight1.3b	792
dLight1.3b _ 1	dLight1.3b	2484
dLight1.3b _ 1	dLight1.3b	1935.36
dLight1.3b _ 1	dLight1.3b	459.36
dLight1.3b _ 1	dLight1.3b	851.04
dLight1.3b _ 1	dLight1.3b	624.96
dLight1.3b _ 1	dLight1.3b	590.4
dLight1.3b _ 1	dLight1.3b	642.24
dLight1.3b _ 1	dLight1.3b	740.16
dLight1.3b _ 1	dLight1.3b	89.28
dLight1.3b _ 1	dLight1.3b	734.4
dLight1.3b _ 1	dLight1.3b	720
dLight1.3b _ 1	dLight1.3b	1811.52
dLight1.3b _ 1	dLight1.3b	722.88
dLight1.3b _ 1	dLight1.3b	1670.4
dLight1.3b _ 1	dLight1.3b	1013.76
dLight1.3b _ 1	dLight1.3b	1170.72
dLight1.3b _ 1	dLight1.3b	493.92
dLight1.3b _ 1	dLight1.3b	449.28
dLight1.3b _ 1	dLight1.3b	491.04
dLight1.3b _ 1	dLight1.3b	763.2
dLight1.3b _ 1	dLight1.3b	799.2
dLight1.3b _ 1	dLight1.3b	1326.24
dLight1.3b _ 1	dLight1.3b	1082.88
dLight1.3b _ 1	dLight1.3b	2279.52
dLight1.3b _ 1	dLight1.3b	1075.68
dLight1.3b _ 1	dLight1.3b	1088.64
dLight1.3b _ 1	dLight1.3b	1026.72
dLight1.3b _ 1	dLight1.3b	1128.96
dLight1.3b _ 1	dLight1.3b	493.92
dLight1.3b _ 1	dLight1.3b	761.76
dLight1.3b _ 1	dLight1.3b	564.48
dLight1.3b _ 1	dLight1.3b	665.28
dLight1.3b _ 1	dLight1.3b	2557.44
dLight1.3b _ 1	dLight1.3b	943.2
dLight1.3b _ 1	dLight1.3b	1451.52
dLight1.3b _ 1	dLight1.3b	573.12
dLight1.3b _ 1	dLight1.3b	591.84
dLight1.3b _ 1	dLight1.3b	427.68
dLight1.3b _ 1	dLight1.3b	321.12
dLight1.3b _ 1	dLight1.3b	1120.32
dLight1.3b _ 1	dLight1.3b	1202.4
dLight1.3b _ 1	dLight1.3b	843.84
dLight1.3b _ 1	dLight1.3b	730.08
dLight1.3b _ 1	dLight1.3b	2576.16
dLight1.3b _ 1	dLight1.3b	1160.64
dLight1.3b _ 1	dLight1.3b	1067.04
dLight1.3b _ 1	dLight1.3b	803.52
dLight1.3b _ 1	dLight1.3b	750.24
dLight1.3b _ 1	dLight1.3b	918.72
dLight1.3b _ 1	dLight1.3b	987.84
dLight1.3b _ 1	dLight1.3b	734.4
dLight1.3b _ 1	dLight1.3b	2515.68
dLight1.3b _ 1	dLight1.3b	580.32
dLight1.3b _ 1	dLight1.3b	1059.84
dLight1.3b _ 1	dLight1.3b	597.6
dLight1.3b _ 1	dLight1.3b	954.72
dLight1.3b _ 1	dLight1.3b	931.68
dLight1.3b _ 1	dLight1.3b	4289.76
dLight1.3b _ 1	dLight1.3b	3250.08
dLight1.3b _ 1	dLight1.3b	750.24
dLight1.3b _ 1	dLight1.3b	1379.52
dLight1.3b _ 1	dLight1.3b	855.36
dLight1.3b _ 1	dLight1.3b	1317.6
dLight1.3b _ 1	dLight1.3b	969.12
dLight1.3b _ 1	dLight1.3b	646.56
dLight1.3b _ 1	dLight1.3b	1028.16
dLight1.3b _ 1	dLight1.3b	851.04
dLight1.3b _ 1	dLight1.3b	653.76
dLight1.3b _ 1	dLight1.3b	456.48
dLight1.3b _ 1	dLight1.3b	508.32
dLight1.3b _ 1	dLight1.3b	613.44
dLight1.3b _ 1	dLight1.3b	843.84
dLight1.3b _ 1	dLight1.3b	603.36
dLight1.3b _ 1	dLight1.3b	849.6
dLight1.3b _ 1	dLight1.3b	796.32
dLight1.3b _ 1	dLight1.3b	2579.04
dLight1.3b _ 1	dLight1.3b	652.32
dLight1.3b _ 1	dLight1.3b	1105.92
dLight1.3b _ 1	dLight1.3b	511.2
dLight1.3b _ 1	dLight1.3b	803.52
dLight1.3b _ 1	dLight1.3b	1687.68
dLight1.3b _ 1	dLight1.3b	859.68
dLight1.3b _ 1	dLight1.3b	2242.08
dLight1.3b _ 1	dLight1.3b	2520
dLight1.3b _ 1	dLight1.3b	576
dLight1.3b _ 1	dLight1.3b	862.56
dLight1.3b _ 1	dLight1.3b	898.56
dLight1.3b _ 1	dLight1.3b	1235.52
dLight1.3b _ 1	dLight1.3b	1006.56
dLight1.3b _ 1	dLight1.3b	1146.24
dLight1.3b _ 1	dLight1.3b	1411.2
dLight1.3b _ 1	dLight1.3b	936
dLight1.3b _ 1	dLight1.3b	731.52
dLight1.3b _ 1	dLight1.3b	1123.2
dLight1.3b _ 1	dLight1.3b	1077.12
dLight1.3b _ 1	dLight1.3b	989.28
dLight1.3b _ 1	dLight1.3b	455.04
dLight1.3b _ 1	dLight1.3b	4272.48
dLight1.3b _ 1	dLight1.3b	614.88
dLight1.3b _ 1	dLight1.3b	905.76
dLight1.3b _ 1	dLight1.3b	833.76
dLight1.3b _ 1	dLight1.3b	957.6
dLight1.3b _ 1	dLight1.3b	931.68
dLight1.3b _ 1	dLight1.3b	927.36
dLight1.3b _ 1	dLight1.3b	648
dLight1.3b _ 1	dLight1.3b	380.16
dLight1.3b _ 1	dLight1.3b	632.16
dLight1.3b _ 1	dLight1.3b	1853.28
dLight1.3b _ 1	dLight1.3b	1297.44
dLight1.3b _ 1	dLight1.3b	635.04
dLight1.3b _ 1	dLight1.3b	1103.04
dLight1.3b _ 1	dLight1.3b	587.52
dLight1.3b _ 1	dLight1.3b	344.16
dLight1.3b _ 1	dLight1.3b	925.92
dLight1.3b _ 1	dLight1.3b	895.68
dLight1.3b _ 1	dLight1.3b	1136.16
dLight1.3b _ 1	dLight1.3b	236.16
dLight1.3b _ 1	dLight1.3b	741.6
dLight1.3b _ 1	dLight1.3b	1326.24
dLight1.3b _ 1	dLight1.3b	371.52
dLight1.3b _ 1	dLight1.3b	1114.56
dLight1.3b _ 1	dLight1.3b	727.2
dLight1.3b _ 1	dLight1.3b	676.8
dLight1.3b _ 1	dLight1.3b	960.48
dLight1.3b _ 1	dLight1.3b	843.84
dLight1.3b _ 1	dLight1.3b	540
dLight1.3b _ 1	dLight1.3b	1195.2
dLight1.3b _ 1	dLight1.3b	578.88
dLight1.3b _ 1	dLight1.3b	623.52
dLight1.3b _ 1	dLight1.3b	1016.64
dLight1.3b _ 1	dLight1.3b	1018.08
dLight1.3b _ 1	dLight1.3b	905.76
dLight1.3b _ 1	dLight1.3b	852.48
dLight1.3b _ 1	dLight1.3b	1036.8
dLight1.3b _ 1	dLight1.3b	1029.6
dLight1.3b _ 1	dLight1.3b	620.64
dLight1.3b _ 1	dLight1.3b	1116
dLight1.3b _ 1	dLight1.3b	612
dLight1.3b _ 1	dLight1.3b	1337.76
dLight1.3b _ 1	dLight1.3b	580.32
dLight1.3b _ 1	dLight1.3b	561.6
dLight1.3b _ 1	dLight1.3b	646.56
dLight1.3b _ 1	dLight1.3b	1092.96
dLight1.3b _ 1	dLight1.3b	498.24
dLight1.3b _ 1	dLight1.3b	531.36
dLight1.3b _ 1	dLight1.3b	568.8
dLight1.3b _ 1	dLight1.3b	459.36
dLight1.3b _ 1	dLight1.3b	587.52
dLight1.3b _ 1	dLight1.3b	695.52
dLight1.3b _ 1	dLight1.3b	1380.96
dLight1.3b _ 1	dLight1.3b	59.04
dLight1.3b _ 1	dLight1.3b	450.72
dLight1.3b _ 1	dLight1.3b	731.52
dLight1.3b _ 1	dLight1.3b	541.44
dLight1.3b _ 1	dLight1.3b	1395.36
dLight1.3b _ 1	dLight1.3b	-27.36
dLight1.3b _ 1	dLight1.3b	853.92
dLight1.3b _ 1	dLight1.3b	715.68
dLight1.3b _ 1	dLight1.3b	743.04
dLight1.3b _ 1	dLight1.3b	491.04
dLight1.3b _ 1	dLight1.3b	420.48
dLight1.3b _ 1	dLight1.3b	678.24
dLight1.3b _ 1	dLight1.3b	924.48
[truncated: 548,001+ more rows]

## Sheet: b
ligand	replicate	ROI	maxDFF
AMN	1	1	0.00553979
AMN	1	2	0.460248
AMN	1	3	-0.0298733
AMN	1	4	0.0606061
AMN	1	5	0.138595
AMN	2	1	0.461155
AMN	2	2	0.596367
AMN	2	3	0.314814
AMN	2	4	0.3005
AMN	2	5	0.363779
AMN	3	1	0.299808
AMN	3	2	0.243892
AMN	3	3	0.221707
AMN	3	4	0.20146
AMN	3	5	0.260451
chPACAP38	2	1	8.41034
chPACAP38	2	2	9.73133
chPACAP38	2	3	10.7129
chPACAP38	2	4	12.5444
chPACAP38	2	5	12.2324
chPACAP38	3	1	11.5736
chPACAP38	3	2	10.7115
chPACAP38	3	3	11.1242
chPACAP38	3	4	10.7914
chPACAP38	3	5	9.74509
chPACAP38	4	1	11.5004
chPACAP38	4	2	5.91731
chPACAP38	4	3	7.9211
chPACAP38	4	4	9.98855
chPACAP38	4	5	7.08562
chPACAP38	5	1	3.09247
chPACAP38	5	2	9.31406
chPACAP38	5	3	9.89967
chPACAP38	5	4	9.91795
chPACAP38	5	5	8.85131
chPACAP38	6	1	7.01391
chPACAP38	6	2	8.0378
chPACAP38	6	3	4.47274
chPACAP38	6	4	7.2854
chPACAP38	6	5	6.1377
CRF	1	1	-0.0484661
CRF	1	2	-0.0128215
CRF	1	3	-0.0116279
CRF	1	4	0.0374122
CRF	1	5	0.034502
CRF	2	1	0.14891
CRF	2	2	0.100849
CRF	2	3	0.124315
CRF	2	4	0.106616
CRF	2	5	0.135746
CRF	3	1	0.0859916
CRF	3	2	0.0711995
CRF	3	3	-0.0322775
CRF	3	4	0.0602469
CRF	3	5	0.0861385
DYN	1	1	-0.0834903
DYN	1	2	-0.0152392
DYN	1	3	-0.0414901
DYN	1	4	-0.0578517
DYN	1	5	-0.0718991
DYN	2	1	-0.0224515
DYN	2	2	-0.00648408
DYN	2	3	-0.0310173
DYN	2	4	-0.0365526
DYN	2	5	-0.0508531
DYN	3	1	0.0197196
DYN	3	2	-0.0162862
DYN	3	3	-0.0196586
DYN	3	4	-0.00602954
DYN	3	5	0.0146327
ENK	1	1	0.0264047
ENK	1	2	0.0228639
ENK	1	3	0.0417991
ENK	1	4	0.0728355
ENK	1	5	0.0282228
ENK	2	1	0.0273329
ENK	2	2	-0.00374937
ENK	2	3	0.0643605
ENK	2	4	0.0188843
ENK	2	5	0.00639483
ENK	3	1	0.0139664
ENK	3	2	-0.0268431
ENK	3	3	-0.075891
ENK	3	4	0.00156636
ENK	3	5	0.0290153
GLP-1	1	1	-0.0210723
GLP-1	1	2	0.0919938
GLP-1	1	3	0.0575311
GLP-1	1	4	0.0303274
GLP-1	1	5	0.0368886
GLP-1	2	1	0.176211
GLP-1	2	2	0.10016
GLP-1	2	3	0.108123
GLP-1	2	4	0.117056
GLP-1	2	5	0.156651
GLP-1	3	1	0.121152
GLP-1	3	2	0.139978
GLP-1	3	3	0.142847
GLP-1	3	4	0.0984753
GLP-1	3	5	0.136145
GLP-1	4	1	0.105505
GLP-1	4	2	0.0819125
GLP-1	4	3	0.1733
GLP-1	4	4	0.0502143
GLP-1	4	5	0.117553
GLP-1	5	1	0.0582964
GLP-1	5	2	0.0472548
GLP-1	5	3	0.0925247
GLP-1	5	4	0.0235751
GLP-1	5	5	0.0547964
Maxadilan1-61	2	1	4.07719
Maxadilan1-61	2	2	2.65301
Maxadilan1-61	2	3	2.91095
Maxadilan1-61	2	4	4.26431
Maxadilan1-61	2	5	4.33789
Maxadilan1-61	3	1	3.9894
Maxadilan1-61	3	2	6.38126
Maxadilan1-61	3	3	4.48723
Maxadilan1-61	3	4	5.52657
Maxadilan1-61	3	5	6.99041
Maxadilan1-61	4	1	5.52693
Maxadilan1-61	4	2	2.26251
Maxadilan1-61	4	3	3.25239
Maxadilan1-61	4	4	5.13886
Maxadilan1-61	4	5	2.92072
Maxadilan1-61	5	1	3.30574
Maxadilan1-61	5	2	3.77646
Maxadilan1-61	5	3	2.29629
Maxadilan1-61	5	4	4.08962
Maxadilan1-61	5	5	5.04459
MCH	1	1	0.166129
MCH	1	2	0.125026
MCH	1	3	0.121501
MCH	1	4	0.273848
MCH	1	5	0.150346
MCH	2	1	0.0949151
MCH	2	2	0.0500919
MCH	2	3	0.0364257
MCH	2	4	0.046907
MCH	2	5	-0.0326436
MCH	3	1	0.0788534
MCH	3	2	0.0363705
MCH	3	3	0.0407739
MCH	3	4	0.0318117
MCH	3	5	0.114187
N-OFQ	1	1	0.0803733
N-OFQ	1	2	0.10957
N-OFQ	1	3	0.11421
N-OFQ	1	4	0.0866667
N-OFQ	1	5	0.0829499
N-OFQ	2	1	0.0747185
N-OFQ	2	2	0.0719389
N-OFQ	2	3	0.104961
N-OFQ	2	4	0.0911532
N-OFQ	2	5	0.045701
N-OFQ	3	1	0.0701163
N-OFQ	3	2	0.0678932
N-OFQ	3	3	0.0105878
N-OFQ	3	4	0.0894631
N-OFQ	3	5	0.0313389
NB	1	1	0.0587935
NB	1	2	0.0165638
NB	1	3	0.066002
NB	1	4	0.122163
NB	1	5	0.0336355
NB	2	1	0.14942
NB	2	2	0.187806
NB	2	3	0.11382
NB	2	4	0.209584
NB	2	5	0.165293
NB	3	1	0.0391375
NB	3	2	0.0547484
NB	3	3	0.0359839
NB	3	4	0.0724302
NB	3	5	0.0490765
NPFF	1	1	0.00601956
NPFF	1	2	0.0179007
NPFF	1	3	0.022946
NPFF	1	4	-0.0202296
NPFF	1	5	-0.026152
NPFF	3	1	-0.000706922
NPFF	3	2	-0.00062513
NPFF	3	3	0.0344173
NPFF	3	4	0.0356353
NPFF	3	5	0.00420966
NPS	1	1	-0.0742206
NPS	1	2	0.0153999
NPS	1	3	-0.0203271
NPS	1	4	0.274758
NPS	1	5	0.00572519
NPS	2	1	0.135551
NPS	2	2	0.0971378
NPS	2	3	0.1694
NPS	2	4	0.0727403
NPS	2	5	0.0777193
NPS	3	1	-0.0010179
NPS	3	2	0.0713286
NPS	3	3	0.0172189
NPS	3	4	0.00235564
NPS	3	5	0.0753906
NT	1	1	0.00177212
NT	1	2	-0.000313054
NT	1	3	-0.0724264
NT	1	4	0.00724966
NT	1	5	-0.000461538
NT	2	1	0.108662
NT	2	2	0.125094
NT	2	3	0.0425279
NT	2	4	0.00591355
NT	2	5	0.052869
NT	3	1	-0.00367032
NT	3	2	0.0575663
NT	3	3	0.0171809
NT	3	4	0.00821339
NT	3	5	0.0120634
OXA-OXB	1	1	0.185056
OXA-OXB	1	2	0.158596
OXA-OXB	1	3	0.110377
OXA-OXB	1	4	0.151525
OXA-OXB	1	5	0.177171
OXA-OXB	2	1	0.132068
OXA-OXB	2	2	0.173484
OXA-OXB	2	3	0.106828
OXA-OXB	2	4	0.102338
OXA-OXB	2	5	0.12464
OXA-OXB	3	1	-0.0105237
OXA-OXB	3	2	-0.000398565
OXA-OXB	3	3	0.073799
OXA-OXB	3	4	0.0521332
OXA-OXB	3	5	0.112932
OXY	1	1	-0.0150392
OXY	1	2	-0.0560339
OXY	1	3	-0.101864
OXY	1	4	-0.00437298
OXY	1	5	0.0296378
OXY	2	1	0.00247294
OXY	2	2	0.0019694
OXY	2	3	-0.00700568
OXY	2	4	-0.00144329
OXY	2	5	0.00559254
OXY	3	1	0.0406911
OXY	3	2	0.0928989
OXY	3	3	0.0358972
OXY	3	4	0.101175
OXY	3	5	0.073114
PACAP38	2	1	11.5798
PACAP38	2	2	10.2792
PACAP38	2	3	9.86684
PACAP38	2	4	11.786
PACAP38	2	5	7.11183
PACAP38	3	1	12.0212
PACAP38	3	2	10.2424
PACAP38	3	3	12.0538
PACAP38	3	4	11.1328
PACAP38	3	5	10.7955
PACAP38	4	1	8.35622
PACAP38	4	2	13.4515
PACAP38	4	3	6.50958
PACAP38	4	4	12.7299
PACAP38	4	5	9.7599
PACAP38	5	1	11.135
PACAP38	5	2	8.90343
PACAP38	5	3	13.7666
PACAP38	5	4	10.1315
PACAP38	5	5	8.81149
PTH	1	1	-0.00339511
PTH	1	2	0.000896196
PTH	1	3	-0.00236804
PTH	1	4	0.00131026
PTH	1	5	0.00637031
PTH	2	1	-0.0646512
PTH	2	2	-0.118314
PTH	2	3	-0.190715
PTH	2	4	-0.0800479
PTH	2	5	0.000769504
PTH	3	1	0.00628423
PTH	3	2	0.00518066
PTH	3	3	0.00976297
PTH	3	4	0.00222222
PTH	3	5	-0.00381109
VIP	1	1	0.474858
VIP	1	2	0.454292
VIP	1	3	0.451196
VIP	1	4	0.502241
VIP	1	5	0.546857
VIP	2	1	0.766794
VIP	2	2	0.657414
VIP	2	3	0.720643
VIP	2	4	0.51681
VIP	2	5	0.645449
VIP	3	1	0.519743
VIP	3	2	0.659152
VIP	3	3	0.54385
VIP	3	4	0.412476
VIP	3	5	0.632828
zfPACAP2	2	1	13.7533
zfPACAP2	2	2	13.7018
zfPACAP2	2	3	10.4251
zfPACAP2	2	4	9.59964
zfPACAP2	2	5	8.64937
zfPACAP2	3	1	10.6713
zfPACAP2	3	2	9.1382
zfPACAP2	3	3	10.3395
zfPACAP2	3	4	7.57703
zfPACAP2	3	5	2.06185
zfPACAP2	4	1	7.91415
zfPACAP2	4	2	7.88805
zfPACAP2	4	3	8.21566
zfPACAP2	4	4	7.90183
zfPACAP2	5	1	10.7703
zfPACAP2	5	2	8.22056
zfPACAP2	5	3	6.89787
zfPACAP2	5	4	8.98854
zfPACAP2	5	5	7.95677

## Sheet: a
FrameCount	ROI	dFF
1	1	-0.465382
1	2	-0.39611
1	3	-0.426948
1	4	-0.42076
1	5	-0.425
1	AvgResp	-0.42684
2	1	-0.471049
2	2	-0.404951
2	3	-0.435918
2	4	-0.432282
2	5	-0.436
2	AvgResp	-0.43604
3	1	-0.476717
3	2	-0.412909
3	3	-0.440901
3	4	-0.445899
3	5	-0.444
3	AvgResp	-0.444085
4	1	-0.477661
4	2	-0.420866
4	3	-0.448874
4	4	-0.451136
4	5	-0.448
4	AvgResp	-0.449308
5	1	-0.487107
5	2	-0.42794
5	3	-0.454853
5	4	-0.458469
5	5	-0.45
5	AvgResp	-0.455674
6	1	0.131576
6	2	0.132626
6	3	0.124178
6	4	0.157432
6	5	0.163
6	AvgResp	0.141762
7	1	0.344101
7	2	0.31565
7	3	0.338449
7	4	0.345973
7	5	0.352
7	AvgResp	0.339235
8	1	0.508454
8	2	0.442971
8	3	0.478971
8	4	0.473761
8	5	0.478
8	AvgResp	0.476431
9	1	0.641636
9	2	0.542882
9	3	0.591589
9	4	0.581649
9	5	0.565
9	AvgResp	0.584551
10	1	0.752149
10	2	0.628647
10	3	0.674307
10	4	0.649733
10	5	0.645
10	AvgResp	0.669967
11	1	0.836214
11	2	0.692308
11	3	0.740084
11	4	0.706295
11	5	0.698
11	AvgResp	0.73458
12	1	0.894777
12	2	0.745358
12	3	0.785928
12	4	0.740861
12	5	0.747
12	AvgResp	0.782785
13	1	0.96184
13	2	0.790451
13	3	0.821806
13	4	0.779617
13	5	0.775
13	AvgResp	0.825743
14	1	1.02607
14	2	0.840849
14	3	0.860674
14	4	0.808945
14	5	0.807
14	AvgResp	0.868707
15	1	1.06291
15	2	0.862953
15	3	0.887582
15	4	0.81942
15	5	0.824
15	AvgResp	0.891372
16	1	1.10447
16	2	0.892131
16	3	0.903528
16	4	0.831989
16	5	0.831
16	AvgResp	0.912623
17	1	1.14414
17	2	0.926614
17	3	0.93243
17	4	0.851891
17	5	0.858
17	AvgResp	0.942615
18	1	1.18853
18	2	0.946065
18	3	0.954355
18	4	0.85608
18	5	0.874
18	AvgResp	0.963807
19	1	1.2112
19	2	0.967286
19	3	0.961331
19	4	0.858175
19	5	0.88
19	AvgResp	0.975599
20	1	1.22537
20	2	0.983201
20	3	0.963325
20	4	0.85608
20	5	0.886
20	AvgResp	0.982795
21	1	1.25087
21	2	0.997347
21	3	0.975284
21	4	0.86865
21	5	0.904
21	AvgResp	0.999231
22	1	1.27071
22	2	1.00884
22	3	0.966315
22	4	0.874935
22	5	0.903
22	AvgResp	1.00476
23	1	1.29149
23	2	1.02299
23	3	0.99123
23	4	0.887504
23	5	0.925
23	AvgResp	1.02364
24	1	1.3066
24	2	1.03714
24	3	0.995216
24	4	0.896931
24	5	0.935
24	AvgResp	1.03418
25	1	1.32738
25	2	1.05217
25	3	0.997209
25	4	0.915785
25	5	0.948
25	AvgResp	1.04811
26	1	1.33777
26	2	1.06543
26	3	1.01814
26	4	0.932544
26	5	0.958
26	AvgResp	1.06238
27	1	1.34911
27	2	1.07515
27	3	1.0301
27	4	0.951398
27	5	0.981
27	AvgResp	1.07735
28	1	1.35289
28	2	1.08134
28	3	1.03608
28	4	0.9713
28	5	0.997
28	AvgResp	1.08772
29	1	1.36611
29	2	1.09195
29	3	1.05501
29	4	0.992249
29	5	1.021
29	AvgResp	1.10527
30	1	1.37461
30	2	1.10168
30	3	1.07295
30	4	1.0111
30	5	1.041
30	AvgResp	1.12027
31	1	1.38972
31	2	1.11848
31	3	1.0869
31	4	1.02996
31	5	1.057
31	AvgResp	1.13641
32	1	1.41428
32	2	1.13793
32	3	1.10783
32	4	1.05091
32	5	1.078
32	AvgResp	1.15779
33	1	1.41523
33	2	1.14324
33	3	1.12876
33	4	1.06871
33	5	1.101
33	AvgResp	1.17139
34	1	1.42089
34	2	1.15561
34	3	1.13972
34	4	1.08128
34	5	1.105
34	AvgResp	1.1805
35	1	1.43884
35	2	1.16799
35	3	1.16564
35	4	1.11271
35	5	1.135
35	AvgResp	1.20404
36	1	1.44923
36	2	1.18126
36	3	1.17959
36	4	1.12842
36	5	1.144
36	AvgResp	1.2165
37	1	1.46245
37	2	1.19275
37	3	1.20351
37	4	1.14203
37	5	1.158
37	AvgResp	1.23175
38	1	1.4719
38	2	1.20513
38	3	1.21746
38	4	1.15984
38	5	1.173
38	AvgResp	1.24547
39	1	1.48796
39	2	1.21574
39	3	1.23341
39	4	1.17346
39	5	1.196
39	AvgResp	1.26131
40	1	1.4974
40	2	1.22723
40	3	1.24636
40	4	1.1965
40	5	1.217
40	AvgResp	1.2769
41	1	1.51063
41	2	1.2405
41	3	1.25334
41	4	1.20279
41	5	1.226
41	AvgResp	1.28665
42	1	1.52102
42	2	1.25022
42	3	1.27427
42	4	1.21745
42	5	1.237
42	AvgResp	1.29999
43	1	1.53613
43	2	1.25818
43	3	1.28722
43	4	1.22688
43	5	1.246
43	AvgResp	1.31088
44	1	1.53424
44	2	1.26437
44	3	1.29121
44	4	1.23526
44	5	1.257
44	AvgResp	1.31641
45	1	1.53991
45	2	1.26967
45	3	1.30018
45	4	1.23316
45	5	1.25
45	AvgResp	1.31858
46	1	1.55219
46	2	1.27763
46	3	1.31015
46	4	1.25306
46	5	1.277
46	AvgResp	1.33401
47	1	1.56824
47	2	1.29355
47	3	1.32111
47	4	1.26459
47	5	1.276
47	AvgResp	1.3447
48	1	1.57958
48	2	1.29885
48	3	1.33506
48	4	1.2782
48	5	1.284
48	AvgResp	1.35514
49	1	1.55219
49	2	1.28736
49	3	1.34104
49	4	1.26878
49	5	1.288
49	AvgResp	1.34747
50	1	1.57958
50	2	1.31123
50	3	1.35001
50	4	1.29077
50	5	1.298
50	AvgResp	1.36592
51	1	1.58808
51	2	1.31742
51	3	1.36496
51	4	1.30439
51	5	1.313
51	AvgResp	1.37757
52	1	1.58902
52	2	1.3183
52	3	1.36596
52	4	1.31591
52	5	1.321
52	AvgResp	1.38204
53	1	1.59564
53	2	1.31919
53	3	1.37293
53	4	1.31067
53	5	1.328
53	AvgResp	1.38529
54	1	1.60792
54	2	1.32714
54	3	1.38489
54	4	1.31382
54	5	1.322
54	AvgResp	1.39115
55	1	1.61169
55	2	1.33952
55	3	1.39585
55	4	1.31905
55	5	1.325
55	AvgResp	1.39822
56	1	1.61547
56	2	1.34218
56	3	1.39785
56	4	1.33372
56	5	1.337
56	AvgResp	1.40524
57	1	1.61642
57	2	1.35013
57	3	1.4108
57	4	1.33058
57	5	1.34
57	AvgResp	1.40959
58	1	1.62775
58	2	1.35367
58	3	1.4108
58	4	1.34629
58	5	1.347
58	AvgResp	1.4171
59	1	1.63814
59	2	1.36074
59	3	1.42675
59	4	1.34419
59	5	1.357
59	AvgResp	1.42536
60	1	1.63436
60	2	1.36074
60	3	1.42675
60	4	1.3599
60	5	1.36
60	AvgResp	1.42835
61	1	1.63531
61	2	1.36782
61	3	1.42177
61	4	1.35886
61	5	1.346
61	AvgResp	1.42595
62	1	1.63058
62	2	1.36516
62	3	1.43572
62	4	1.35676
62	5	1.363
62	AvgResp	1.43025
63	1	1.64003
63	2	1.36958
63	3	1.43472
63	4	1.36305
63	5	1.361
63	AvgResp	1.43368
64	1	1.64097
64	2	1.37401
64	3	1.44867
64	4	1.37457
64	5	1.364
64	AvgResp	1.44044
65	1	1.65042
65	2	1.37577
65	3	1.44768
65	4	1.36933
65	5	1.367
65	AvgResp	1.44204
66	1	1.65892
66	2	1.38815
66	3	1.46263
66	4	1.38714
66	5	1.382
66	AvgResp	1.45577
67	1	1.66081
67	2	1.39169
67	3	1.46063
67	4	1.38504
67	5	1.378
67	AvgResp	1.45524
68	1	1.65609
68	2	1.38992
68	3	1.46263
68	4	1.39133
68	5	1.384
68	AvgResp	1.45679
69	1	1.66648
69	2	1.39169
69	3	1.45366
69	4	1.39761
69	5	1.377
69	AvgResp	1.45729
70	1	1.6627
70	2	1.39346
70	3	1.46063
70	4	1.38818
70	5	1.382
70	AvgResp	1.4574
71	1	1.65231
71	2	1.38727
71	3	1.45764
71	4	1.39447
71	5	1.375
71	AvgResp	1.45334
72	1	1.66081
72	2	1.38727
72	3	1.46462
72	4	1.4039
72	5	1.384
72	AvgResp	1.46012
73	1	1.65798
73	2	1.38992
73	3	1.46861
73	4	1.4018
73	5	1.379
73	AvgResp	1.45946
74	1	1.67215
74	2	1.40053
74	3	1.48555
74	4	1.41647
74	5	1.399
74	AvgResp	1.47474
75	1	1.67498
75	2	1.40141
75	3	1.47957
75	4	1.4217
75	5	1.384
75	AvgResp	1.47233
76	1	1.67403
76	2	1.40141
76	3	1.49153
76	4	1.4238
76	5	1.395
76	AvgResp	1.47716
77	1	1.67687
77	2	1.40495
77	3	1.48754
77	4	1.42066
77	5	1.395
77	AvgResp	1.477
78	1	1.67403
78	2	1.4076
78	3	1.48655
78	4	1.43113
78	5	1.396
78	AvgResp	1.47906
79	1	1.67215
79	2	1.40937
79	3	1.5005
79	4	1.43113
79	5	1.405
79	AvgResp	1.48363
80	1	1.67403
80	2	1.40495
80	3	1.49651
80	4	1.42275
80	5	1.397
80	AvgResp	1.47905
81	1	1.6797
81	2	1.40849
81	3	1.49651
81	4	1.43532
81	5	1.384
81	AvgResp	1.4808
82	1	1.67215
82	2	1.40849
82	3	1.50448
82	4	1.42275
82	5	1.389
82	AvgResp	1.47937
83	1	1.6797
83	2	1.41379
83	3	1.50648
83	4	1.42904
83	5	1.391
83	AvgResp	1.484
84	1	1.66931
84	2	1.40937
84	3	1.50947
84	4	1.43323
84	5	1.404
84	AvgResp	1.48508
85	1	1.67687
85	2	1.41556
85	3	1.50548
85	4	1.43113
85	5	1.386
85	AvgResp	1.48301
86	1	1.6712
86	2	1.40495
86	3	1.51046
86	4	1.43008
86	5	1.384
86	AvgResp	1.48014
87	1	1.67309
87	2	1.40937
87	3	1.5005
87	4	1.42275
87	5	1.389
87	AvgResp	1.47894
88	1	1.67026
88	2	1.41645
88	3	1.50648
88	4	1.42485
88	5	1.397
88	AvgResp	1.48301
89	1	1.67498
89	2	1.41645
89	3	1.50747
89	4	1.43637
89	5	1.402
89	AvgResp	1.48745
90	1	1.66364
90	2	1.4076
90	3	1.50747
90	4	1.43113
90	5	1.4
90	AvgResp	1.48197
91	1	1.67403
91	2	1.41202
91	3	1.50448
91	4	1.42799
91	5	1.385
91	AvgResp	1.48071
92	1	1.66175
92	2	1.41026
92	3	1.50448
92	4	1.43113
92	5	1.387
92	AvgResp	1.47893
93	1	1.65798
93	2	1.40053
93	3	1.50847
93	4	1.42485
93	5	1.394
93	AvgResp	1.47716
94	1	1.6627
94	2	1.40937
94	3	1.5005
94	4	1.4238
94	5	1.378
94	AvgResp	1.47487
95	1	1.65987
95	2	1.40937
95	3	1.5005
95	4	1.42275
95	5	1.378
95	AvgResp	1.4741
96	1	1.65609
96	2	1.4076
96	3	1.4995
96	4	1.42066
96	5	1.382
96	AvgResp	1.47317
97	1	1.65892
97	2	1.4076
97	3	1.50747
97	4	1.43008
97	5	1.377
97	AvgResp	1.47622
98	1	1.65042
98	2	1.39257
98	3	1.49552
98	4	1.41332
98	5	1.38
98	AvgResp	1.46637
99	1	1.64664
99	2	1.39523
99	3	1.49253
99	4	1.41751
99	5	1.368
99	AvgResp	1.46398
100	1	1.65609
100	2	1.40495
100	3	1.50249
100	4	1.41647
100	5	1.372
100	AvgResp	1.4704
101	1	1.6457
101	2	1.39346
101	3	1.49751
101	4	1.40704
101	5	1.355
101	AvgResp	1.45974
102	1	1.65987
102	2	1.4023
102	3	1.50648
102	4	1.41018
102	5	1.376
102	AvgResp	1.47096
103	1	1.6287
103	2	1.37843
103	3	1.48455
103	4	1.40285
103	5	1.353
103	AvgResp	1.4495
104	1	1.57391
104	2	1.31123
104	3	1.4407
104	4	1.44265
104	5	1.349
104	AvgResp	1.4235
105	1	1.42278
105	2	1.19275
105	3	1.30417
105	4	1.32953
105	5	1.236
105	AvgResp	1.29705
106	1	1.27638
106	2	1.08311
106	3	1.18557
106	4	1.23735
106	5	1.123
106	AvgResp	1.18108
107	1	1.14792
107	2	0.982317
107	3	1.07594
107	4	1.15041
107	5	1.038
107	AvgResp	1.07892
108	1	1.03174
108	2	0.879752
108	3	0.958342
108	4	1.05824
108	5	0.944
108	AvgResp	0.974414
109	1	0.915557
109	2	0.784262
109	3	0.866653
109	4	0.976537
109	5	0.845
109	AvgResp	0.877602
110	1	0.820157
110	2	0.695844
110	3	0.773969
110	4	0.897978
110	5	0.771
110	AvgResp	0.79179
111	1	0.724757
111	2	0.62069
111	3	0.686267
111	4	0.812088
111	5	0.676
111	AvgResp	0.70396
112	1	0.646359
112	2	0.543767
112	3	0.604545
112	4	0.735624
112	5	0.602
112	AvgResp	0.626459
113	1	0.575517
113	2	0.473033
113	3	0.534782
113	4	0.666492
113	5	0.528
113	AvgResp	0.555565
114	1	0.518844
114	2	0.419982
114	3	0.469005
114	4	0.615167
114	5	0.464
114	AvgResp	0.4974
115	1	0.457448
115	2	0.358974
115	3	0.407215
115	4	0.544988
115	5	0.412
115	AvgResp	0.436125
116	1	0.401719
116	2	0.304156
116	3	0.347419
116	4	0.483188
116	5	0.344
116	AvgResp	0.376096
117	1	0.348824
117	2	0.258179
117	3	0.300578
117	4	0.418247
117	5	0.294
117	AvgResp	0.323965
118	1	0.301596
118	2	0.220159
118	3	0.259717
118	4	0.367969
118	5	0.246
118	AvgResp	0.279088
119	1	0.265703
119	2	0.18214
119	3	0.215866
119	4	0.316644
119	5	0.204
119	AvgResp	0.236871
120	1	0.234533
120	2	0.151194
120	3	0.182978
120	4	0.273699
120	5	0.168
120	AvgResp	0.202081
121	1	0.195806
121	2	0.1229
121	3	0.149093
121	4	0.226563
121	5	0.125
121	AvgResp	0.163873
122	1	0.171248
122	2	0.0963749
122	3	0.120191
122	4	0.187808
122	5	0.102
122	AvgResp	0.135524
123	1	0.141022
123	2	0.0725022
123	3	0.0982659
123	4	0.155337
123	5	0.067
123	AvgResp	0.106825
124	1	0.114574
124	2	0.0512821
124	3	0.0713574
124	4	0.124961
124	5	0.05
124	AvgResp	0.0824349
125	1	0.0947388
125	2	0.0327144
125	3	0.0474387
125	4	0.0893474
125	5	0.023
125	AvgResp	0.0574479
126	1	0.0692359
126	2	0.0106101
126	3	0.0304963
126	4	0.057924
126	5	0.004
126	AvgResp	0.0344532
127	1	0.0503448
127	2	-0.000884173
127	3	0.0145505
127	4	0.036975
127	5	-0.014
127	AvgResp	0.0173972
128	1	0.02862
128	2	-0.0238727
128	3	-0.00438509
128	4	0.0128836
128	5	-0.034
128	AvgResp	-0.00415083
129	1	0.0135071
129	2	-0.0327144
129	3	-0.0183377
129	4	-0.00492301
129	5	-0.05
129	AvgResp	-0.0184936
130	1	-0.00349485
130	2	-0.0450928
130	3	-0.0372733
130	4	-0.0279669
130	5	-0.066
130	AvgResp	-0.0359656
131	1	-0.013885
131	2	-0.0565871
131	3	-0.0532191
131	4	-0.0447261
131	5	-0.08
131	AvgResp	-0.0496834
132	1	-0.0308869
132	2	-0.0627763
132	3	-0.0582021
132	4	-0.056248
132	5	-0.091
132	AvgResp	-0.0598227
133	1	-0.0374988
133	2	-0.0707339
133	3	-0.0721547
133	4	-0.0698649
133	5	-0.104
133	AvgResp	-0.0708504
134	1	-0.0545008
134	2	-0.0831123
134	3	-0.084114
134	4	-0.0824343
134	5	-0.111
134	AvgResp	-0.0830323
135	1	-0.0648909
135	2	-0.0910698
135	3	-0.0900937
135	4	-0.0939562
135	5	-0.12
135	AvgResp	-0.0920021
136	1	-0.0800038
136	2	-0.104332
136	3	-0.0990632
136	4	-0.105478
136	5	-0.133
136	AvgResp	-0.104376
137	1	-0.0894493
137	2	-0.111406
137	3	-0.109029
137	4	-0.118048
137	5	-0.141
137	AvgResp	-0.113786
138	1	-0.0941721
138	2	-0.116711
138	3	-0.118995
138	4	-0.120142
138	5	-0.147
138	AvgResp	-0.119404
139	1	-0.102673
139	2	-0.120248
139	3	-0.127965
139	4	-0.129569
139	5	-0.152
139	AvgResp	-0.126491
140	1	-0.113063
140	2	-0.128205
140	3	-0.130955
140	4	-0.136902
140	5	-0.158
140	AvgResp	-0.133425
141	1	-0.125342
141	2	-0.135279
141	3	-0.142914
141	4	-0.144234
141	5	-0.169
141	AvgResp	-0.143354
142	1	-0.131954
142	2	-0.140584
142	3	-0.146901
142	4	-0.154708
142	5	-0.17
142	AvgResp	-0.148829
143	1	-0.133843
143	2	-0.143236
143	3	-0.151884
143	4	-0.155756
143	5	-0.179
143	AvgResp	-0.152744
144	1	-0.140455
144	2	-0.149425
144	3	-0.157863
144	4	-0.156803
144	5	-0.188
144	AvgResp	-0.158509
145	1	-0.147067
145	2	-0.15473
145	3	-0.162846
145	4	-0.157851
145	5	-0.19
145	AvgResp	-0.162499
146	1	-0.156513
146	2	-0.16092
146	3	-0.168826
146	4	-0.167278
146	5	-0.199
146	AvgResp	-0.170507
147	1	-0.164069
147	2	-0.163572
147	3	-0.168826
147	4	-0.169373
147	5	-0.203
147	AvgResp	-0.173768
148	1	-0.168792
148	2	-0.168877
148	3	-0.180785
148	4	-0.17042
148	5	-0.204
148	AvgResp	-0.178575
149	1	-0.176348
149	2	-0.17595
149	3	-0.187762
149	4	-0.179847
149	5	-0.213
149	AvgResp	-0.186582
150	1	-0.176348
150	2	-0.177719
150	3	-0.186765
150	4	-0.180895
150	5	-0.219
150	AvgResp	-0.188145
