# Supplementary material for: Probing PAC1 receptor activation across species with an engineered sensor
Source: eLife. 2024 Aug 15;13:RP96496. doi: 10.7554/eLife.96496 (PMC11326774; doi:10.7554/eLife.96496)
Supplement: Figure 3—source data 1. [file elife-96496-fig3-data1.xlsx]

## Sheet: stablePAClight1
.rownames	name	combined	group	well_col	peptideConc	FITC-A
HEK293_PACight1_PACAP38_A10_A10_010.fcs	HEK293_PACight1_PACAP38_A10_A10_010.fcs	stable_HEK293_PAClight1_10	stable_HEK293_PAClight1	10	300	4148.28
HEK293_PACight1_PACAP38_A10_A10_010.fcs	HEK293_PACight1_PACAP38_A10_A10_010.fcs	stable_HEK293_PAClight1_10	stable_HEK293_PAClight1	10	300	1938.9
HEK293_PACight1_PACAP38_A10_A10_010.fcs	HEK293_PACight1_PACAP38_A10_A10_010.fcs	stable_HEK293_PAClight1_10	stable_HEK293_PAClight1	10	300	2504.7
HEK293_PACight1_PACAP38_A10_A10_010.fcs	HEK293_PACight1_PACAP38_A10_A10_010.fcs	stable_HEK293_PAClight1_10	stable_HEK293_PAClight1	10	300	2833.14
HEK293_PACight1_PACAP38_A10_A10_010.fcs	HEK293_PACight1_PACAP38_A10_A10_010.fcs	stable_HEK293_PAClight1_10	stable_HEK293_PAClight1	10	300	6284.52
HEK293_PACight1_PACAP38_A10_A10_010.fcs	HEK293_PACight1_PACAP38_A10_A10_010.fcs	stable_HEK293_PAClight1_10	stable_HEK293_PAClight1	10	300	4443.6
HEK293_PACight1_PACAP38_A10_A10_010.fcs	HEK293_PACight1_PACAP38_A10_A10_010.fcs	stable_HEK293_PAClight1_10	stable_HEK293_PAClight1	10	300	1570.44
HEK293_PACight1_PACAP38_A10_A10_010.fcs	HEK293_PACight1_PACAP38_A10_A10_010.fcs	stable_HEK293_PAClight1_10	stable_HEK293_PAClight1	10	300	5057.7
HEK293_PACight1_PACAP38_A10_A10_010.fcs	HEK293_PACight1_PACAP38_A10_A10_010.fcs	stable_HEK293_PAClight1_10	stable_HEK293_PAClight1	10	300	4454.64
HEK293_PACight1_PACAP38_A10_A10_010.fcs	HEK293_PACight1_PACAP38_A10_A10_010.fcs	stable_HEK293_PAClight1_10	stable_HEK293_PAClight1	10	300	532.68
HEK293_PACight1_PACAP38_A10_A10_010.fcs	HEK293_PACight1_PACAP38_A10_A10_010.fcs	stable_HEK293_PAClight1_10	stable_HEK293_PAClight1	10	300	3499.68
HEK293_PACight1_PACAP38_A10_A10_010.fcs	HEK293_PACight1_PACAP38_A10_A10_010.fcs	stable_HEK293_PAClight1_10	stable_HEK293_PAClight1	10	300	4246.26
HEK293_PACight1_PACAP38_A10_A10_010.fcs	HEK293_PACight1_PACAP38_A10_A10_010.fcs	stable_HEK293_PAClight1_10	stable_HEK293_PAClight1	10	300	193.2
HEK293_PACight1_PACAP38_A10_A10_010.fcs	HEK293_PACight1_PACAP38_A10_A10_010.fcs	stable_HEK293_PAClight1_10	stable_HEK293_PAClight1	10	300	18587.2
HEK293_PACight1_PACAP38_A10_A10_010.fcs	HEK293_PACight1_PACAP38_A10_A10_010.fcs	stable_HEK293_PAClight1_10	stable_HEK293_PAClight1	10	300	3637.68
HEK293_PACight1_PACAP38_A10_A10_010.fcs	HEK293_PACight1_PACAP38_A10_A10_010.fcs	stable_HEK293_PAClight1_10	stable_HEK293_PAClight1	10	300	8747.82
HEK293_PACight1_PACAP38_A10_A10_010.fcs	HEK293_PACight1_PACAP38_A10_A10_010.fcs	stable_HEK293_PAClight1_10	stable_HEK293_PAClight1	10	300	3691.5
HEK293_PACight1_PACAP38_A10_A10_010.fcs	HEK293_PACight1_PACAP38_A10_A10_010.fcs	stable_HEK293_PAClight1_10	stable_HEK293_PAClight1	10	300	3687.36
HEK293_PACight1_PACAP38_A10_A10_010.fcs	HEK293_PACight1_PACAP38_A10_A10_010.fcs	stable_HEK293_PAClight1_10	stable_HEK293_PAClight1	10	300	5063.22
HEK293_PACight1_PACAP38_A10_A10_010.fcs	HEK293_PACight1_PACAP38_A10_A10_010.fcs	stable_HEK293_PAClight1_10	stable_HEK293_PAClight1	10	300	9825.6
HEK293_PACight1_PACAP38_A10_A10_010.fcs	HEK293_PACight1_PACAP38_A10_A10_010.fcs	stable_HEK293_PAClight1_10	stable_HEK293_PAClight1	10	300	6077.52
HEK293_PACight1_PACAP38_A10_A10_010.fcs	HEK293_PACight1_PACAP38_A10_A10_010.fcs	stable_HEK293_PAClight1_10	stable_HEK293_PAClight1	10	300	2664.78
HEK293_PACight1_PACAP38_A10_A10_010.fcs	HEK293_PACight1_PACAP38_A10_A10_010.fcs	stable_HEK293_PAClight1_10	stable_HEK293_PAClight1	10	300	4242.12
HEK293_PACight1_PACAP38_A10_A10_010.fcs	HEK293_PACight1_PACAP38_A10_A10_010.fcs	stable_HEK293_PAClight1_10	stable_HEK293_PAClight1	10	300	4588.5
HEK293_PACight1_PACAP38_A10_A10_010.fcs	HEK293_PACight1_PACAP38_A10_A10_010.fcs	stable_HEK293_PAClight1_10	stable_HEK293_PAClight1	10	300	2024.46
HEK293_PACight1_PACAP38_A10_A10_010.fcs	HEK293_PACight1_PACAP38_A10_A10_010.fcs	stable_HEK293_PAClight1_10	stable_HEK293_PAClight1	10	300	9368.82
HEK293_PACight1_PACAP38_A10_A10_010.fcs	HEK293_PACight1_PACAP38_A10_A10_010.fcs	stable_HEK293_PAClight1_10	stable_HEK293_PAClight1	10	300	1501.44
HEK293_PACight1_PACAP38_A10_A10_010.fcs	HEK293_PACight1_PACAP38_A10_A10_010.fcs	stable_HEK293_PAClight1_10	stable_HEK293_PAClight1	10	300	5796
HEK293_PACight1_PACAP38_A10_A10_010.fcs	HEK293_PACight1_PACAP38_A10_A10_010.fcs	stable_HEK293_PAClight1_10	stable_HEK293_PAClight1	10	300	11024.8
HEK293_PACight1_PACAP38_A10_A10_010.fcs	HEK293_PACight1_PACAP38_A10_A10_010.fcs	stable_HEK293_PAClight1_10	stable_HEK293_PAClight1	10	300	5140.5
HEK293_PACight1_PACAP38_A10_A10_010.fcs	HEK293_PACight1_PACAP38_A10_A10_010.fcs	stable_HEK293_PAClight1_10	stable_HEK293_PAClight1	10	300	7182.9
HEK293_PACight1_PACAP38_A10_A10_010.fcs	HEK293_PACight1_PACAP38_A10_A10_010.fcs	stable_HEK293_PAClight1_10	stable_HEK293_PAClight1	10	300	2179.02
HEK293_PACight1_PACAP38_A10_A10_010.fcs	HEK293_PACight1_PACAP38_A10_A10_010.fcs	stable_HEK293_PAClight1_10	stable_HEK293_PAClight1	10	300	10372.1
HEK293_PACight1_PACAP38_A10_A10_010.fcs	HEK293_PACight1_PACAP38_A10_A10_010.fcs	stable_HEK293_PAClight1_10	stable_HEK293_PAClight1	10	300	4188.3
HEK293_PACight1_PACAP38_A10_A10_010.fcs	HEK293_PACight1_PACAP38_A10_A10_010.fcs	stable_HEK293_PAClight1_10	stable_HEK293_PAClight1	10	300	3833.64
HEK293_PACight1_PACAP38_A10_A10_010.fcs	HEK293_PACight1_PACAP38_A10_A10_010.fcs	stable_HEK293_PAClight1_10	stable_HEK293_PAClight1	10	300	2439.84
HEK293_PACight1_PACAP38_A10_A10_010.fcs	HEK293_PACight1_PACAP38_A10_A10_010.fcs	stable_HEK293_PAClight1_10	stable_HEK293_PAClight1	10	300	339.48
HEK293_PACight1_PACAP38_A10_A10_010.fcs	HEK293_PACight1_PACAP38_A10_A10_010.fcs	stable_HEK293_PAClight1_10	stable_HEK293_PAClight1	10	300	5800.14
HEK293_PACight1_PACAP38_A10_A10_010.fcs	HEK293_PACight1_PACAP38_A10_A10_010.fcs	stable_HEK293_PAClight1_10	stable_HEK293_PAClight1	10	300	2610.96
HEK293_PACight1_PACAP38_A10_A10_010.fcs	HEK293_PACight1_PACAP38_A10_A10_010.fcs	stable_HEK293_PAClight1_10	stable_HEK293_PAClight1	10	300	3735.66
HEK293_PACight1_PACAP38_A10_A10_010.fcs	HEK293_PACight1_PACAP38_A10_A10_010.fcs	stable_HEK293_PAClight1_10	stable_HEK293_PAClight1	10	300	5348.88
HEK293_PACight1_PACAP38_A10_A10_010.fcs	HEK293_PACight1_PACAP38_A10_A10_010.fcs	stable_HEK293_PAClight1_10	stable_HEK293_PAClight1	10	300	3241.62
HEK293_PACight1_PACAP38_A10_A10_010.fcs	HEK293_PACight1_PACAP38_A10_A10_010.fcs	stable_HEK293_PAClight1_10	stable_HEK293_PAClight1	10	300	5997.48
HEK293_PACight1_PACAP38_A10_A10_010.fcs	HEK293_PACight1_PACAP38_A10_A10_010.fcs	stable_HEK293_PAClight1_10	stable_HEK293_PAClight1	10	300	5272.98
HEK293_PACight1_PACAP38_A10_A10_010.fcs	HEK293_PACight1_PACAP38_A10_A10_010.fcs	stable_HEK293_PAClight1_10	stable_HEK293_PAClight1	10	300	3398.94
HEK293_PACight1_PACAP38_A10_A10_010.fcs	HEK293_PACight1_PACAP38_A10_A10_010.fcs	stable_HEK293_PAClight1_10	stable_HEK293_PAClight1	10	300	718.98
HEK293_PACight1_PACAP38_A10_A10_010.fcs	HEK293_PACight1_PACAP38_A10_A10_010.fcs	stable_HEK293_PAClight1_10	stable_HEK293_PAClight1	10	300	4562.28
HEK293_PACight1_PACAP38_A10_A10_010.fcs	HEK293_PACight1_PACAP38_A10_A10_010.fcs	stable_HEK293_PAClight1_10	stable_HEK293_PAClight1	10	300	7394.04
HEK293_PACight1_PACAP38_A10_A10_010.fcs	HEK293_PACight1_PACAP38_A10_A10_010.fcs	stable_HEK293_PAClight1_10	stable_HEK293_PAClight1	10	300	7592.76
HEK293_PACight1_PACAP38_A10_A10_010.fcs	HEK293_PACight1_PACAP38_A10_A10_010.fcs	stable_HEK293_PAClight1_10	stable_HEK293_PAClight1	10	300	3534.18
HEK293_PACight1_PACAP38_A10_A10_010.fcs	HEK293_PACight1_PACAP38_A10_A10_010.fcs	stable_HEK293_PAClight1_10	stable_HEK293_PAClight1	10	300	2413.62
HEK293_PACight1_PACAP38_A10_A10_010.fcs	HEK293_PACight1_PACAP38_A10_A10_010.fcs	stable_HEK293_PAClight1_10	stable_HEK293_PAClight1	10	300	2413.62
HEK293_PACight1_PACAP38_A10_A10_010.fcs	HEK293_PACight1_PACAP38_A10_A10_010.fcs	stable_HEK293_PAClight1_10	stable_HEK293_PAClight1	10	300	16177.7
HEK293_PACight1_PACAP38_A10_A10_010.fcs	HEK293_PACight1_PACAP38_A10_A10_010.fcs	stable_HEK293_PAClight1_10	stable_HEK293_PAClight1	10	300	22433.3
HEK293_PACight1_PACAP38_A10_A10_010.fcs	HEK293_PACight1_PACAP38_A10_A10_010.fcs	stable_HEK293_PAClight1_10	stable_HEK293_PAClight1	10	300	4958.34
HEK293_PACight1_PACAP38_A10_A10_010.fcs	HEK293_PACight1_PACAP38_A10_A10_010.fcs	stable_HEK293_PAClight1_10	stable_HEK293_PAClight1	10	300	5016.3
HEK293_PACight1_PACAP38_A10_A10_010.fcs	HEK293_PACight1_PACAP38_A10_A10_010.fcs	stable_HEK293_PAClight1_10	stable_HEK293_PAClight1	10	300	1575.96
HEK293_PACight1_PACAP38_A10_A10_010.fcs	HEK293_PACight1_PACAP38_A10_A10_010.fcs	stable_HEK293_PAClight1_10	stable_HEK293_PAClight1	10	300	2797.26
HEK293_PACight1_PACAP38_A10_A10_010.fcs	HEK293_PACight1_PACAP38_A10_A10_010.fcs	stable_HEK293_PAClight1_10	stable_HEK293_PAClight1	10	300	2864.88
HEK293_PACight1_PACAP38_A10_A10_010.fcs	HEK293_PACight1_PACAP38_A10_A10_010.fcs	stable_HEK293_PAClight1_10	stable_HEK293_PAClight1	10	300	5368.2
HEK293_PACight1_PACAP38_A10_A10_010.fcs	HEK293_PACight1_PACAP38_A10_A10_010.fcs	stable_HEK293_PAClight1_10	stable_HEK293_PAClight1	10	300	1520.76
HEK293_PACight1_PACAP38_A10_A10_010.fcs	HEK293_PACight1_PACAP38_A10_A10_010.fcs	stable_HEK293_PAClight1_10	stable_HEK293_PAClight1	10	300	2357.04
HEK293_PACight1_PACAP38_A10_A10_010.fcs	HEK293_PACight1_PACAP38_A10_A10_010.fcs	stable_HEK293_PAClight1_10	stable_HEK293_PAClight1	10	300	9671.04
HEK293_PACight1_PACAP38_A10_A10_010.fcs	HEK293_PACight1_PACAP38_A10_A10_010.fcs	stable_HEK293_PAClight1_10	stable_HEK293_PAClight1	10	300	5572.44
HEK293_PACight1_PACAP38_A10_A10_010.fcs	HEK293_PACight1_PACAP38_A10_A10_010.fcs	stable_HEK293_PAClight1_10	stable_HEK293_PAClight1	10	300	195.96
HEK293_PACight1_PACAP38_A10_A10_010.fcs	HEK293_PACight1_PACAP38_A10_A10_010.fcs	stable_HEK293_PAClight1_10	stable_HEK293_PAClight1	10	300	4729.26
HEK293_PACight1_PACAP38_A10_A10_010.fcs	HEK293_PACight1_PACAP38_A10_A10_010.fcs	stable_HEK293_PAClight1_10	stable_HEK293_PAClight1	10	300	81.42
HEK293_PACight1_PACAP38_A10_A10_010.fcs	HEK293_PACight1_PACAP38_A10_A10_010.fcs	stable_HEK293_PAClight1_10	stable_HEK293_PAClight1	10	300	589.26
HEK293_PACight1_PACAP38_A10_A10_010.fcs	HEK293_PACight1_PACAP38_A10_A10_010.fcs	stable_HEK293_PAClight1_10	stable_HEK293_PAClight1	10	300	971.52
HEK293_PACight1_PACAP38_A10_A10_010.fcs	HEK293_PACight1_PACAP38_A10_A10_010.fcs	stable_HEK293_PAClight1_10	stable_HEK293_PAClight1	10	300	2579.22
HEK293_PACight1_PACAP38_A10_A10_010.fcs	HEK293_PACight1_PACAP38_A10_A10_010.fcs	stable_HEK293_PAClight1_10	stable_HEK293_PAClight1	10	300	2935.26
HEK293_PACight1_PACAP38_A10_A10_010.fcs	HEK293_PACight1_PACAP38_A10_A10_010.fcs	stable_HEK293_PAClight1_10	stable_HEK293_PAClight1	10	300	2918.7
HEK293_PACight1_PACAP38_A10_A10_010.fcs	HEK293_PACight1_PACAP38_A10_A10_010.fcs	stable_HEK293_PAClight1_10	stable_HEK293_PAClight1	10	300	1487.64
HEK293_PACight1_PACAP38_A10_A10_010.fcs	HEK293_PACight1_PACAP38_A10_A10_010.fcs	stable_HEK293_PAClight1_10	stable_HEK293_PAClight1	10	300	212.52
HEK293_PACight1_PACAP38_A10_A10_010.fcs	HEK293_PACight1_PACAP38_A10_A10_010.fcs	stable_HEK293_PAClight1_10	stable_HEK293_PAClight1	10	300	350.52
HEK293_PACight1_PACAP38_A10_A10_010.fcs	HEK293_PACight1_PACAP38_A10_A10_010.fcs	stable_HEK293_PAClight1_10	stable_HEK293_PAClight1	10	300	1524.9
HEK293_PACight1_PACAP38_A10_A10_010.fcs	HEK293_PACight1_PACAP38_A10_A10_010.fcs	stable_HEK293_PAClight1_10	stable_HEK293_PAClight1	10	300	4830
HEK293_PACight1_PACAP38_A10_A10_010.fcs	HEK293_PACight1_PACAP38_A10_A10_010.fcs	stable_HEK293_PAClight1_10	stable_HEK293_PAClight1	10	300	2955.96
HEK293_PACight1_PACAP38_A10_A10_010.fcs	HEK293_PACight1_PACAP38_A10_A10_010.fcs	stable_HEK293_PAClight1_10	stable_HEK293_PAClight1	10	300	6745.44
HEK293_PACight1_PACAP38_A10_A10_010.fcs	HEK293_PACight1_PACAP38_A10_A10_010.fcs	stable_HEK293_PAClight1_10	stable_HEK293_PAClight1	10	300	5662.14
HEK293_PACight1_PACAP38_A10_A10_010.fcs	HEK293_PACight1_PACAP38_A10_A10_010.fcs	stable_HEK293_PAClight1_10	stable_HEK293_PAClight1	10	300	5067.36
HEK293_PACight1_PACAP38_A10_A10_010.fcs	HEK293_PACight1_PACAP38_A10_A10_010.fcs	stable_HEK293_PAClight1_10	stable_HEK293_PAClight1	10	300	158.7
HEK293_PACight1_PACAP38_A10_A10_010.fcs	HEK293_PACight1_PACAP38_A10_A10_010.fcs	stable_HEK293_PAClight1_10	stable_HEK293_PAClight1	10	300	3466.56
HEK293_PACight1_PACAP38_A10_A10_010.fcs	HEK293_PACight1_PACAP38_A10_A10_010.fcs	stable_HEK293_PAClight1_10	stable_HEK293_PAClight1	10	300	4443.6
HEK293_PACight1_PACAP38_A10_A10_010.fcs	HEK293_PACight1_PACAP38_A10_A10_010.fcs	stable_HEK293_PAClight1_10	stable_HEK293_PAClight1	10	300	396.06
HEK293_PACight1_PACAP38_A10_A10_010.fcs	HEK293_PACight1_PACAP38_A10_A10_010.fcs	stable_HEK293_PAClight1_10	stable_HEK293_PAClight1	10	300	1564.92
HEK293_PACight1_PACAP38_A10_A10_010.fcs	HEK293_PACight1_PACAP38_A10_A10_010.fcs	stable_HEK293_PAClight1_10	stable_HEK293_PAClight1	10	300	5684.22
HEK293_PACight1_PACAP38_A10_A10_010.fcs	HEK293_PACight1_PACAP38_A10_A10_010.fcs	stable_HEK293_PAClight1_10	stable_HEK293_PAClight1	10	300	1541.46
HEK293_PACight1_PACAP38_A10_A10_010.fcs	HEK293_PACight1_PACAP38_A10_A10_010.fcs	stable_HEK293_PAClight1_10	stable_HEK293_PAClight1	10	300	4174.5
HEK293_PACight1_PACAP38_A10_A10_010.fcs	HEK293_PACight1_PACAP38_A10_A10_010.fcs	stable_HEK293_PAClight1_10	stable_HEK293_PAClight1	10	300	3961.98
HEK293_PACight1_PACAP38_A10_A10_010.fcs	HEK293_PACight1_PACAP38_A10_A10_010.fcs	stable_HEK293_PAClight1_10	stable_HEK293_PAClight1	10	300	106.26
HEK293_PACight1_PACAP38_A10_A10_010.fcs	HEK293_PACight1_PACAP38_A10_A10_010.fcs	stable_HEK293_PAClight1_10	stable_HEK293_PAClight1	10	300	5110.14
HEK293_PACight1_PACAP38_A10_A10_010.fcs	HEK293_PACight1_PACAP38_A10_A10_010.fcs	stable_HEK293_PAClight1_10	stable_HEK293_PAClight1	10	300	2994.6
HEK293_PACight1_PACAP38_A10_A10_010.fcs	HEK293_PACight1_PACAP38_A10_A10_010.fcs	stable_HEK293_PAClight1_10	stable_HEK293_PAClight1	10	300	2635.8
HEK293_PACight1_PACAP38_A10_A10_010.fcs	HEK293_PACight1_PACAP38_A10_A10_010.fcs	stable_HEK293_PAClight1_10	stable_HEK293_PAClight1	10	300	2983.56
HEK293_PACight1_PACAP38_A10_A10_010.fcs	HEK293_PACight1_PACAP38_A10_A10_010.fcs	stable_HEK293_PAClight1_10	stable_HEK293_PAClight1	10	300	3531.42
HEK293_PACight1_PACAP38_A10_A10_010.fcs	HEK293_PACight1_PACAP38_A10_A10_010.fcs	stable_HEK293_PAClight1_10	stable_HEK293_PAClight1	10	300	7042.14
HEK293_PACight1_PACAP38_A10_A10_010.fcs	HEK293_PACight1_PACAP38_A10_A10_010.fcs	stable_HEK293_PAClight1_10	stable_HEK293_PAClight1	10	300	3538.32
HEK293_PACight1_PACAP38_A10_A10_010.fcs	HEK293_PACight1_PACAP38_A10_A10_010.fcs	stable_HEK293_PAClight1_10	stable_HEK293_PAClight1	10	300	3491.4
HEK293_PACight1_PACAP38_A10_A10_010.fcs	HEK293_PACight1_PACAP38_A10_A10_010.fcs	stable_HEK293_PAClight1_10	stable_HEK293_PAClight1	10	300	5239.86
HEK293_PACight1_PACAP38_A10_A10_010.fcs	HEK293_PACight1_PACAP38_A10_A10_010.fcs	stable_HEK293_PAClight1_10	stable_HEK293_PAClight1	10	300	7490.64
HEK293_PACight1_PACAP38_A10_A10_010.fcs	HEK293_PACight1_PACAP38_A10_A10_010.fcs	stable_HEK293_PAClight1_10	stable_HEK293_PAClight1	10	300	2733.78
HEK293_PACight1_PACAP38_A10_A10_010.fcs	HEK293_PACight1_PACAP38_A10_A10_010.fcs	stable_HEK293_PAClight1_10	stable_HEK293_PAClight1	10	300	2314.26
HEK293_PACight1_PACAP38_A10_A10_010.fcs	HEK293_PACight1_PACAP38_A10_A10_010.fcs	stable_HEK293_PAClight1_10	stable_HEK293_PAClight1	10	300	7460.28
HEK293_PACight1_PACAP38_A10_A10_010.fcs	HEK293_PACight1_PACAP38_A10_A10_010.fcs	stable_HEK293_PAClight1_10	stable_HEK293_PAClight1	10	300	3968.88
HEK293_PACight1_PACAP38_A10_A10_010.fcs	HEK293_PACight1_PACAP38_A10_A10_010.fcs	stable_HEK293_PAClight1_10	stable_HEK293_PAClight1	10	300	2729.64
HEK293_PACight1_PACAP38_A10_A10_010.fcs	HEK293_PACight1_PACAP38_A10_A10_010.fcs	stable_HEK293_PAClight1_10	stable_HEK293_PAClight1	10	300	2485.38
HEK293_PACight1_PACAP38_A10_A10_010.fcs	HEK293_PACight1_PACAP38_A10_A10_010.fcs	stable_HEK293_PAClight1_10	stable_HEK293_PAClight1	10	300	5824.98
HEK293_PACight1_PACAP38_A10_A10_010.fcs	HEK293_PACight1_PACAP38_A10_A10_010.fcs	stable_HEK293_PAClight1_10	stable_HEK293_PAClight1	10	300	3792.24
HEK293_PACight1_PACAP38_A10_A10_010.fcs	HEK293_PACight1_PACAP38_A10_A10_010.fcs	stable_HEK293_PAClight1_10	stable_HEK293_PAClight1	10	300	189.06
HEK293_PACight1_PACAP38_A10_A10_010.fcs	HEK293_PACight1_PACAP38_A10_A10_010.fcs	stable_HEK293_PAClight1_10	stable_HEK293_PAClight1	10	300	3000.12
HEK293_PACight1_PACAP38_A10_A10_010.fcs	HEK293_PACight1_PACAP38_A10_A10_010.fcs	stable_HEK293_PAClight1_10	stable_HEK293_PAClight1	10	300	99.36
HEK293_PACight1_PACAP38_A10_A10_010.fcs	HEK293_PACight1_PACAP38_A10_A10_010.fcs	stable_HEK293_PAClight1_10	stable_HEK293_PAClight1	10	300	7151.16
HEK293_PACight1_PACAP38_A10_A10_010.fcs	HEK293_PACight1_PACAP38_A10_A10_010.fcs	stable_HEK293_PAClight1_10	stable_HEK293_PAClight1	10	300	357.42
HEK293_PACight1_PACAP38_A10_A10_010.fcs	HEK293_PACight1_PACAP38_A10_A10_010.fcs	stable_HEK293_PAClight1_10	stable_HEK293_PAClight1	10	300	8135.1
HEK293_PACight1_PACAP38_A10_A10_010.fcs	HEK293_PACight1_PACAP38_A10_A10_010.fcs	stable_HEK293_PAClight1_10	stable_HEK293_PAClight1	10	300	282.9
HEK293_PACight1_PACAP38_A10_A10_010.fcs	HEK293_PACight1_PACAP38_A10_A10_010.fcs	stable_HEK293_PAClight1_10	stable_HEK293_PAClight1	10	300	2065.86
HEK293_PACight1_PACAP38_A10_A10_010.fcs	HEK293_PACight1_PACAP38_A10_A10_010.fcs	stable_HEK293_PAClight1_10	stable_HEK293_PAClight1	10	300	197.34
HEK293_PACight1_PACAP38_A10_A10_010.fcs	HEK293_PACight1_PACAP38_A10_A10_010.fcs	stable_HEK293_PAClight1_10	stable_HEK293_PAClight1	10	300	2997.36
HEK293_PACight1_PACAP38_A10_A10_010.fcs	HEK293_PACight1_PACAP38_A10_A10_010.fcs	stable_HEK293_PAClight1_10	stable_HEK293_PAClight1	10	300	4636.8
HEK293_PACight1_PACAP38_A10_A10_010.fcs	HEK293_PACight1_PACAP38_A10_A10_010.fcs	stable_HEK293_PAClight1_10	stable_HEK293_PAClight1	10	300	2394.3
HEK293_PACight1_PACAP38_A10_A10_010.fcs	HEK293_PACight1_PACAP38_A10_A10_010.fcs	stable_HEK293_PAClight1_10	stable_HEK293_PAClight1	10	300	2296.32
HEK293_PACight1_PACAP38_A10_A10_010.fcs	HEK293_PACight1_PACAP38_A10_A10_010.fcs	stable_HEK293_PAClight1_10	stable_HEK293_PAClight1	10	300	5997.48
HEK293_PACight1_PACAP38_A10_A10_010.fcs	HEK293_PACight1_PACAP38_A10_A10_010.fcs	stable_HEK293_PAClight1_10	stable_HEK293_PAClight1	10	300	2141.76
HEK293_PACight1_PACAP38_A10_A10_010.fcs	HEK293_PACight1_PACAP38_A10_A10_010.fcs	stable_HEK293_PAClight1_10	stable_HEK293_PAClight1	10	300	3596.28
HEK293_PACight1_PACAP38_A10_A10_010.fcs	HEK293_PACight1_PACAP38_A10_A10_010.fcs	stable_HEK293_PAClight1_10	stable_HEK293_PAClight1	10	300	3455.52
HEK293_PACight1_PACAP38_A10_A10_010.fcs	HEK293_PACight1_PACAP38_A10_A10_010.fcs	stable_HEK293_PAClight1_10	stable_HEK293_PAClight1	10	300	9000.36
HEK293_PACight1_PACAP38_A10_A10_010.fcs	HEK293_PACight1_PACAP38_A10_A10_010.fcs	stable_HEK293_PAClight1_10	stable_HEK293_PAClight1	10	300	7319.52
HEK293_PACight1_PACAP38_A10_A10_010.fcs	HEK293_PACight1_PACAP38_A10_A10_010.fcs	stable_HEK293_PAClight1_10	stable_HEK293_PAClight1	10	300	18940.5
HEK293_PACight1_PACAP38_A10_A10_010.fcs	HEK293_PACight1_PACAP38_A10_A10_010.fcs	stable_HEK293_PAClight1_10	stable_HEK293_PAClight1	10	300	8703.66
HEK293_PACight1_PACAP38_A10_A10_010.fcs	HEK293_PACight1_PACAP38_A10_A10_010.fcs	stable_HEK293_PAClight1_10	stable_HEK293_PAClight1	10	300	7726.62
HEK293_PACight1_PACAP38_A10_A10_010.fcs	HEK293_PACight1_PACAP38_A10_A10_010.fcs	stable_HEK293_PAClight1_10	stable_HEK293_PAClight1	10	300	6773.04
HEK293_PACight1_PACAP38_A10_A10_010.fcs	HEK293_PACight1_PACAP38_A10_A10_010.fcs	stable_HEK293_PAClight1_10	stable_HEK293_PAClight1	10	300	26402.2
HEK293_PACight1_PACAP38_A10_A10_010.fcs	HEK293_PACight1_PACAP38_A10_A10_010.fcs	stable_HEK293_PAClight1_10	stable_HEK293_PAClight1	10	300	8543.58
HEK293_PACight1_PACAP38_A10_A10_010.fcs	HEK293_PACight1_PACAP38_A10_A10_010.fcs	stable_HEK293_PAClight1_10	stable_HEK293_PAClight1	10	300	1983.06
HEK293_PACight1_PACAP38_A10_A10_010.fcs	HEK293_PACight1_PACAP38_A10_A10_010.fcs	stable_HEK293_PAClight1_10	stable_HEK293_PAClight1	10	300	2679.96
HEK293_PACight1_PACAP38_A10_A10_010.fcs	HEK293_PACight1_PACAP38_A10_A10_010.fcs	stable_HEK293_PAClight1_10	stable_HEK293_PAClight1	10	300	3038.76
HEK293_PACight1_PACAP38_A10_A10_010.fcs	HEK293_PACight1_PACAP38_A10_A10_010.fcs	stable_HEK293_PAClight1_10	stable_HEK293_PAClight1	10	300	4767.9
HEK293_PACight1_PACAP38_A10_A10_010.fcs	HEK293_PACight1_PACAP38_A10_A10_010.fcs	stable_HEK293_PAClight1_10	stable_HEK293_PAClight1	10	300	2446.74
HEK293_PACight1_PACAP38_A10_A10_010.fcs	HEK293_PACight1_PACAP38_A10_A10_010.fcs	stable_HEK293_PAClight1_10	stable_HEK293_PAClight1	10	300	4399.44
HEK293_PACight1_PACAP38_A10_A10_010.fcs	HEK293_PACight1_PACAP38_A10_A10_010.fcs	stable_HEK293_PAClight1_10	stable_HEK293_PAClight1	10	300	2282.52
HEK293_PACight1_PACAP38_A10_A10_010.fcs	HEK293_PACight1_PACAP38_A10_A10_010.fcs	stable_HEK293_PAClight1_10	stable_HEK293_PAClight1	10	300	2045.16
HEK293_PACight1_PACAP38_A10_A10_010.fcs	HEK293_PACight1_PACAP38_A10_A10_010.fcs	stable_HEK293_PAClight1_10	stable_HEK293_PAClight1	10	300	6963.48
HEK293_PACight1_PACAP38_A10_A10_010.fcs	HEK293_PACight1_PACAP38_A10_A10_010.fcs	stable_HEK293_PAClight1_10	stable_HEK293_PAClight1	10	300	7262.94
HEK293_PACight1_PACAP38_A10_A10_010.fcs	HEK293_PACight1_PACAP38_A10_A10_010.fcs	stable_HEK293_PAClight1_10	stable_HEK293_PAClight1	10	300	3107.76
HEK293_PACight1_PACAP38_A10_A10_010.fcs	HEK293_PACight1_PACAP38_A10_A10_010.fcs	stable_HEK293_PAClight1_10	stable_HEK293_PAClight1	10	300	2544.72
HEK293_PACight1_PACAP38_A10_A10_010.fcs	HEK293_PACight1_PACAP38_A10_A10_010.fcs	stable_HEK293_PAClight1_10	stable_HEK293_PAClight1	10	300	2842.8
HEK293_PACight1_PACAP38_A10_A10_010.fcs	HEK293_PACight1_PACAP38_A10_A10_010.fcs	stable_HEK293_PAClight1_10	stable_HEK293_PAClight1	10	300	1861.62
HEK293_PACight1_PACAP38_A10_A10_010.fcs	HEK293_PACight1_PACAP38_A10_A10_010.fcs	stable_HEK293_PAClight1_10	stable_HEK293_PAClight1	10	300	4133.1
HEK293_PACight1_PACAP38_A10_A10_010.fcs	HEK293_PACight1_PACAP38_A10_A10_010.fcs	stable_HEK293_PAClight1_10	stable_HEK293_PAClight1	10	300	11078.6
HEK293_PACight1_PACAP38_A10_A10_010.fcs	HEK293_PACight1_PACAP38_A10_A10_010.fcs	stable_HEK293_PAClight1_10	stable_HEK293_PAClight1	10	300	4817.58
HEK293_PACight1_PACAP38_A10_A10_010.fcs	HEK293_PACight1_PACAP38_A10_A10_010.fcs	stable_HEK293_PAClight1_10	stable_HEK293_PAClight1	10	300	3392.04
HEK293_PACight1_PACAP38_A10_A10_010.fcs	HEK293_PACight1_PACAP38_A10_A10_010.fcs	stable_HEK293_PAClight1_10	stable_HEK293_PAClight1	10	300	2593.02
HEK293_PACight1_PACAP38_A10_A10_010.fcs	HEK293_PACight1_PACAP38_A10_A10_010.fcs	stable_HEK293_PAClight1_10	stable_HEK293_PAClight1	10	300	2755.86
HEK293_PACight1_PACAP38_A10_A10_010.fcs	HEK293_PACight1_PACAP38_A10_A10_010.fcs	stable_HEK293_PAClight1_10	stable_HEK293_PAClight1	10	300	2072.76
HEK293_PACight1_PACAP38_A10_A10_010.fcs	HEK293_PACight1_PACAP38_A10_A10_010.fcs	stable_HEK293_PAClight1_10	stable_HEK293_PAClight1	10	300	5780.82
HEK293_PACight1_PACAP38_A10_A10_010.fcs	HEK293_PACight1_PACAP38_A10_A10_010.fcs	stable_HEK293_PAClight1_10	stable_HEK293_PAClight1	10	300	3517.62
HEK293_PACight1_PACAP38_A10_A10_010.fcs	HEK293_PACight1_PACAP38_A10_A10_010.fcs	stable_HEK293_PAClight1_10	stable_HEK293_PAClight1	10	300	6759.24
HEK293_PACight1_PACAP38_A10_A10_010.fcs	HEK293_PACight1_PACAP38_A10_A10_010.fcs	stable_HEK293_PAClight1_10	stable_HEK293_PAClight1	10	300	4331.82
HEK293_PACight1_PACAP38_A10_A10_010.fcs	HEK293_PACight1_PACAP38_A10_A10_010.fcs	stable_HEK293_PAClight1_10	stable_HEK293_PAClight1	10	300	12075
HEK293_PACight1_PACAP38_A10_A10_010.fcs	HEK293_PACight1_PACAP38_A10_A10_010.fcs	stable_HEK293_PAClight1_10	stable_HEK293_PAClight1	10	300	4598.16
HEK293_PACight1_PACAP38_A10_A10_010.fcs	HEK293_PACight1_PACAP38_A10_A10_010.fcs	stable_HEK293_PAClight1_10	stable_HEK293_PAClight1	10	300	702.42
HEK293_PACight1_PACAP38_A10_A10_010.fcs	HEK293_PACight1_PACAP38_A10_A10_010.fcs	stable_HEK293_PAClight1_10	stable_HEK293_PAClight1	10	300	1825.74
HEK293_PACight1_PACAP38_A10_A10_010.fcs	HEK293_PACight1_PACAP38_A10_A10_010.fcs	stable_HEK293_PAClight1_10	stable_HEK293_PAClight1	10	300	4144.14
HEK293_PACight1_PACAP38_A10_A10_010.fcs	HEK293_PACight1_PACAP38_A10_A10_010.fcs	stable_HEK293_PAClight1_10	stable_HEK293_PAClight1	10	300	4059.96
HEK293_PACight1_PACAP38_A10_A10_010.fcs	HEK293_PACight1_PACAP38_A10_A10_010.fcs	stable_HEK293_PAClight1_10	stable_HEK293_PAClight1	10	300	8055.06
HEK293_PACight1_PACAP38_A10_A10_010.fcs	HEK293_PACight1_PACAP38_A10_A10_010.fcs	stable_HEK293_PAClight1_10	stable_HEK293_PAClight1	10	300	982.56
HEK293_PACight1_PACAP38_A10_A10_010.fcs	HEK293_PACight1_PACAP38_A10_A10_010.fcs	stable_HEK293_PAClight1_10	stable_HEK293_PAClight1	10	300	3658.38
HEK293_PACight1_PACAP38_A10_A10_010.fcs	HEK293_PACight1_PACAP38_A10_A10_010.fcs	stable_HEK293_PAClight1_10	stable_HEK293_PAClight1	10	300	1520.76
HEK293_PACight1_PACAP38_A10_A10_010.fcs	HEK293_PACight1_PACAP38_A10_A10_010.fcs	stable_HEK293_PAClight1_10	stable_HEK293_PAClight1	10	300	7464.42
HEK293_PACight1_PACAP38_A10_A10_010.fcs	HEK293_PACight1_PACAP38_A10_A10_010.fcs	stable_HEK293_PAClight1_10	stable_HEK293_PAClight1	10	300	19124
HEK293_PACight1_PACAP38_A10_A10_010.fcs	HEK293_PACight1_PACAP38_A10_A10_010.fcs	stable_HEK293_PAClight1_10	stable_HEK293_PAClight1	10	300	2806.92
HEK293_PACight1_PACAP38_A10_A10_010.fcs	HEK293_PACight1_PACAP38_A10_A10_010.fcs	stable_HEK293_PAClight1_10	stable_HEK293_PAClight1	10	300	8528.4
HEK293_PACight1_PACAP38_A10_A10_010.fcs	HEK293_PACight1_PACAP38_A10_A10_010.fcs	stable_HEK293_PAClight1_10	stable_HEK293_PAClight1	10	300	2933.88
HEK293_PACight1_PACAP38_A10_A10_010.fcs	HEK293_PACight1_PACAP38_A10_A10_010.fcs	stable_HEK293_PAClight1_10	stable_HEK293_PAClight1	10	300	2616.48
HEK293_PACight1_PACAP38_A10_A10_010.fcs	HEK293_PACight1_PACAP38_A10_A10_010.fcs	stable_HEK293_PAClight1_10	stable_HEK293_PAClight1	10	300	6088.56
HEK293_PACight1_PACAP38_A10_A10_010.fcs	HEK293_PACight1_PACAP38_A10_A10_010.fcs	stable_HEK293_PAClight1_10	stable_HEK293_PAClight1	10	300	6940.02
HEK293_PACight1_PACAP38_A10_A10_010.fcs	HEK293_PACight1_PACAP38_A10_A10_010.fcs	stable_HEK293_PAClight1_10	stable_HEK293_PAClight1	10	300	10094.7
HEK293_PACight1_PACAP38_A10_A10_010.fcs	HEK293_PACight1_PACAP38_A10_A10_010.fcs	stable_HEK293_PAClight1_10	stable_HEK293_PAClight1	10	300	3367.2
HEK293_PACight1_PACAP38_A10_A10_010.fcs	HEK293_PACight1_PACAP38_A10_A10_010.fcs	stable_HEK293_PAClight1_10	stable_HEK293_PAClight1	10	300	2653.74
HEK293_PACight1_PACAP38_A10_A10_010.fcs	HEK293_PACight1_PACAP38_A10_A10_010.fcs	stable_HEK293_PAClight1_10	stable_HEK293_PAClight1	10	300	8180.64
HEK293_PACight1_PACAP38_A10_A10_010.fcs	HEK293_PACight1_PACAP38_A10_A10_010.fcs	stable_HEK293_PAClight1_10	stable_HEK293_PAClight1	10	300	6069.24
HEK293_PACight1_PACAP38_A10_A10_010.fcs	HEK293_PACight1_PACAP38_A10_A10_010.fcs	stable_HEK293_PAClight1_10	stable_HEK293_PAClight1	10	300	2764.14
HEK293_PACight1_PACAP38_A10_A10_010.fcs	HEK293_PACight1_PACAP38_A10_A10_010.fcs	stable_HEK293_PAClight1_10	stable_HEK293_PAClight1	10	300	3841.92
HEK293_PACight1_PACAP38_A10_A10_010.fcs	HEK293_PACight1_PACAP38_A10_A10_010.fcs	stable_HEK293_PAClight1_10	stable_HEK293_PAClight1	10	300	796.26
HEK293_PACight1_PACAP38_A10_A10_010.fcs	HEK293_PACight1_PACAP38_A10_A10_010.fcs	stable_HEK293_PAClight1_10	stable_HEK293_PAClight1	10	300	5063.22
HEK293_PACight1_PACAP38_A10_A10_010.fcs	HEK293_PACight1_PACAP38_A10_A10_010.fcs	stable_HEK293_PAClight1_10	stable_HEK293_PAClight1	10	300	5071.5
HEK293_PACight1_PACAP38_A10_A10_010.fcs	HEK293_PACight1_PACAP38_A10_A10_010.fcs	stable_HEK293_PAClight1_10	stable_HEK293_PAClight1	10	300	3935.76
HEK293_PACight1_PACAP38_A10_A10_010.fcs	HEK293_PACight1_PACAP38_A10_A10_010.fcs	stable_HEK293_PAClight1_10	stable_HEK293_PAClight1	10	300	7050.42
HEK293_PACight1_PACAP38_A10_A10_010.fcs	HEK293_PACight1_PACAP38_A10_A10_010.fcs	stable_HEK293_PAClight1_10	stable_HEK293_PAClight1	10	300	8212.38
HEK293_PACight1_PACAP38_A10_A10_010.fcs	HEK293_PACight1_PACAP38_A10_A10_010.fcs	stable_HEK293_PAClight1_10	stable_HEK293_PAClight1	10	300	2566.8
HEK293_PACight1_PACAP38_A10_A10_010.fcs	HEK293_PACight1_PACAP38_A10_A10_010.fcs	stable_HEK293_PAClight1_10	stable_HEK293_PAClight1	10	300	4625.76
HEK293_PACight1_PACAP38_A10_A10_010.fcs	HEK293_PACight1_PACAP38_A10_A10_010.fcs	stable_HEK293_PAClight1_10	stable_HEK293_PAClight1	10	300	9339.84
HEK293_PACight1_PACAP38_A10_A10_010.fcs	HEK293_PACight1_PACAP38_A10_A10_010.fcs	stable_HEK293_PAClight1_10	stable_HEK293_PAClight1	10	300	449.88
HEK293_PACight1_PACAP38_A10_A10_010.fcs	HEK293_PACight1_PACAP38_A10_A10_010.fcs	stable_HEK293_PAClight1_10	stable_HEK293_PAClight1	10	300	4551.24
HEK293_PACight1_PACAP38_A10_A10_010.fcs	HEK293_PACight1_PACAP38_A10_A10_010.fcs	stable_HEK293_PAClight1_10	stable_HEK293_PAClight1	10	300	1878.18
HEK293_PACight1_PACAP38_A10_A10_010.fcs	HEK293_PACight1_PACAP38_A10_A10_010.fcs	stable_HEK293_PAClight1_10	stable_HEK293_PAClight1	10	300	2710.32
HEK293_PACight1_PACAP38_A10_A10_010.fcs	HEK293_PACight1_PACAP38_A10_A10_010.fcs	stable_HEK293_PAClight1_10	stable_HEK293_PAClight1	10	300	3305.1
HEK293_PACight1_PACAP38_A10_A10_010.fcs	HEK293_PACight1_PACAP38_A10_A10_010.fcs	stable_HEK293_PAClight1_10	stable_HEK293_PAClight1	10	300	5858.1
HEK293_PACight1_PACAP38_A10_A10_010.fcs	HEK293_PACight1_PACAP38_A10_A10_010.fcs	stable_HEK293_PAClight1_10	stable_HEK293_PAClight1	10	300	4355.28
HEK293_PACight1_PACAP38_A10_A10_010.fcs	HEK293_PACight1_PACAP38_A10_A10_010.fcs	stable_HEK293_PAClight1_10	stable_HEK293_PAClight1	10	300	3942.66
HEK293_PACight1_PACAP38_A10_A10_010.fcs	HEK293_PACight1_PACAP38_A10_A10_010.fcs	stable_HEK293_PAClight1_10	stable_HEK293_PAClight1	10	300	9237.72
HEK293_PACight1_PACAP38_A10_A10_010.fcs	HEK293_PACight1_PACAP38_A10_A10_010.fcs	stable_HEK293_PAClight1_10	stable_HEK293_PAClight1	10	300	158.7
HEK293_PACight1_PACAP38_A10_A10_010.fcs	HEK293_PACight1_PACAP38_A10_A10_010.fcs	stable_HEK293_PAClight1_10	stable_HEK293_PAClight1	10	300	3031.86
HEK293_PACight1_PACAP38_A10_A10_010.fcs	HEK293_PACight1_PACAP38_A10_A10_010.fcs	stable_HEK293_PAClight1_10	stable_HEK293_PAClight1	10	300	200.1
HEK293_PACight1_PACAP38_A10_A10_010.fcs	HEK293_PACight1_PACAP38_A10_A10_010.fcs	stable_HEK293_PAClight1_10	stable_HEK293_PAClight1	10	300	3450
HEK293_PACight1_PACAP38_A10_A10_010.fcs	HEK293_PACight1_PACAP38_A10_A10_010.fcs	stable_HEK293_PAClight1_10	stable_HEK293_PAClight1	10	300	3757.74
HEK293_PACight1_PACAP38_A10_A10_010.fcs	HEK293_PACight1_PACAP38_A10_A10_010.fcs	stable_HEK293_PAClight1_10	stable_HEK293_PAClight1	10	300	8786.46
HEK293_PACight1_PACAP38_A10_A10_010.fcs	HEK293_PACight1_PACAP38_A10_A10_010.fcs	stable_HEK293_PAClight1_10	stable_HEK293_PAClight1	10	300	5212.26
HEK293_PACight1_PACAP38_A10_A10_010.fcs	HEK293_PACight1_PACAP38_A10_A10_010.fcs	stable_HEK293_PAClight1_10	stable_HEK293_PAClight1	10	300	8059.2
HEK293_PACight1_PACAP38_A10_A10_010.fcs	HEK293_PACight1_PACAP38_A10_A10_010.fcs	stable_HEK293_PAClight1_10	stable_HEK293_PAClight1	10	300	7667.28
HEK293_PACight1_PACAP38_A10_A10_010.fcs	HEK293_PACight1_PACAP38_A10_A10_010.fcs	stable_HEK293_PAClight1_10	stable_HEK293_PAClight1	10	300	2546.1
HEK293_PACight1_PACAP38_A10_A10_010.fcs	HEK293_PACight1_PACAP38_A10_A10_010.fcs	stable_HEK293_PAClight1_10	stable_HEK293_PAClight1	10	300	2641.32
HEK293_PACight1_PACAP38_A10_A10_010.fcs	HEK293_PACight1_PACAP38_A10_A10_010.fcs	stable_HEK293_PAClight1_10	stable_HEK293_PAClight1	10	300	5082.54
HEK293_PACight1_PACAP38_A10_A10_010.fcs	HEK293_PACight1_PACAP38_A10_A10_010.fcs	stable_HEK293_PAClight1_10	stable_HEK293_PAClight1	10	300	837.66
HEK293_PACight1_PACAP38_A10_A10_010.fcs	HEK293_PACight1_PACAP38_A10_A10_010.fcs	stable_HEK293_PAClight1_10	stable_HEK293_PAClight1	10	300	4391.16
HEK293_PACight1_PACAP38_A10_A10_010.fcs	HEK293_PACight1_PACAP38_A10_A10_010.fcs	stable_HEK293_PAClight1_10	stable_HEK293_PAClight1	10	300	1397.94
HEK293_PACight1_PACAP38_A10_A10_010.fcs	HEK293_PACight1_PACAP38_A10_A10_010.fcs	stable_HEK293_PAClight1_10	stable_HEK293_PAClight1	10	300	3666.66
HEK293_PACight1_PACAP38_A10_A10_010.fcs	HEK293_PACight1_PACAP38_A10_A10_010.fcs	stable_HEK293_PAClight1_10	stable_HEK293_PAClight1	10	300	1119.18
HEK293_PACight1_PACAP38_A10_A10_010.fcs	HEK293_PACight1_PACAP38_A10_A10_010.fcs	stable_HEK293_PAClight1_10	stable_HEK293_PAClight1	10	300	6306.6
HEK293_PACight1_PACAP38_A10_A10_010.fcs	HEK293_PACight1_PACAP38_A10_A10_010.fcs	stable_HEK293_PAClight1_10	stable_HEK293_PAClight1	10	300	4294.56
HEK293_PACight1_PACAP38_A10_A10_010.fcs	HEK293_PACight1_PACAP38_A10_A10_010.fcs	stable_HEK293_PAClight1_10	stable_HEK293_PAClight1	10	300	5964.36
HEK293_PACight1_PACAP38_A10_A10_010.fcs	HEK293_PACight1_PACAP38_A10_A10_010.fcs	stable_HEK293_PAClight1_10	stable_HEK293_PAClight1	10	300	4562.28
HEK293_PACight1_PACAP38_A10_A10_010.fcs	HEK293_PACight1_PACAP38_A10_A10_010.fcs	stable_HEK293_PAClight1_10	stable_HEK293_PAClight1	10	300	10850.9
HEK293_PACight1_PACAP38_A10_A10_010.fcs	HEK293_PACight1_PACAP38_A10_A10_010.fcs	stable_HEK293_PAClight1_10	stable_HEK293_PAClight1	10	300	9120.42
HEK293_PACight1_PACAP38_A10_A10_010.fcs	HEK293_PACight1_PACAP38_A10_A10_010.fcs	stable_HEK293_PAClight1_10	stable_HEK293_PAClight1	10	300	5310.24
HEK293_PACight1_PACAP38_A10_A10_010.fcs	HEK293_PACight1_PACAP38_A10_A10_010.fcs	stable_HEK293_PAClight1_10	stable_HEK293_PAClight1	10	300	-20.7
HEK293_PACight1_PACAP38_A10_A10_010.fcs	HEK293_PACight1_PACAP38_A10_A10_010.fcs	stable_HEK293_PAClight1_10	stable_HEK293_PAClight1	10	300	3657
HEK293_PACight1_PACAP38_A10_A10_010.fcs	HEK293_PACight1_PACAP38_A10_A10_010.fcs	stable_HEK293_PAClight1_10	stable_HEK293_PAClight1	10	300	11161.4
HEK293_PACight1_PACAP38_A10_A10_010.fcs	HEK293_PACight1_PACAP38_A10_A10_010.fcs	stable_HEK293_PAClight1_10	stable_HEK293_PAClight1	10	300	3974.4
HEK293_PACight1_PACAP38_A10_A10_010.fcs	HEK293_PACight1_PACAP38_A10_A10_010.fcs	stable_HEK293_PAClight1_10	stable_HEK293_PAClight1	10	300	6956.58
HEK293_PACight1_PACAP38_A10_A10_010.fcs	HEK293_PACight1_PACAP38_A10_A10_010.fcs	stable_HEK293_PAClight1_10	stable_HEK293_PAClight1	10	300	2110.02
HEK293_PACight1_PACAP38_A10_A10_010.fcs	HEK293_PACight1_PACAP38_A10_A10_010.fcs	stable_HEK293_PAClight1_10	stable_HEK293_PAClight1	10	300	5452.38
HEK293_PACight1_PACAP38_A10_A10_010.fcs	HEK293_PACight1_PACAP38_A10_A10_010.fcs	stable_HEK293_PAClight1_10	stable_HEK293_PAClight1	10	300	1667.04
HEK293_PACight1_PACAP38_A10_A10_010.fcs	HEK293_PACight1_PACAP38_A10_A10_010.fcs	stable_HEK293_PAClight1_10	stable_HEK293_PAClight1	10	300	8884.44
HEK293_PACight1_PACAP38_A10_A10_010.fcs	HEK293_PACight1_PACAP38_A10_A10_010.fcs	stable_HEK293_PAClight1_10	stable_HEK293_PAClight1	10	300	3848.82
HEK293_PACight1_PACAP38_A10_A10_010.fcs	HEK293_PACight1_PACAP38_A10_A10_010.fcs	stable_HEK293_PAClight1_10	stable_HEK293_PAClight1	10	300	2087.94
HEK293_PACight1_PACAP38_A10_A10_010.fcs	HEK293_PACight1_PACAP38_A10_A10_010.fcs	stable_HEK293_PAClight1_10	stable_HEK293_PAClight1	10	300	2002.38
HEK293_PACight1_PACAP38_A10_A10_010.fcs	HEK293_PACight1_PACAP38_A10_A10_010.fcs	stable_HEK293_PAClight1_10	stable_HEK293_PAClight1	10	300	3215.4
HEK293_PACight1_PACAP38_A10_A10_010.fcs	HEK293_PACight1_PACAP38_A10_A10_010.fcs	stable_HEK293_PAClight1_10	stable_HEK293_PAClight1	10	300	6156.18
HEK293_PACight1_PACAP38_A10_A10_010.fcs	HEK293_PACight1_PACAP38_A10_A10_010.fcs	stable_HEK293_PAClight1_10	stable_HEK293_PAClight1	10	300	3654.24
HEK293_PACight1_PACAP38_A10_A10_010.fcs	HEK293_PACight1_PACAP38_A10_A10_010.fcs	stable_HEK293_PAClight1_10	stable_HEK293_PAClight1	10	300	8459.4
HEK293_PACight1_PACAP38_A10_A10_010.fcs	HEK293_PACight1_PACAP38_A10_A10_010.fcs	stable_HEK293_PAClight1_10	stable_HEK293_PAClight1	10	300	1850.58
HEK293_PACight1_PACAP38_A10_A10_010.fcs	HEK293_PACight1_PACAP38_A10_A10_010.fcs	stable_HEK293_PAClight1_10	stable_HEK293_PAClight1	10	300	2978.04
HEK293_PACight1_PACAP38_A10_A10_010.fcs	HEK293_PACight1_PACAP38_A10_A10_010.fcs	stable_HEK293_PAClight1_10	stable_HEK293_PAClight1	10	300	3797.76
HEK293_PACight1_PACAP38_A10_A10_010.fcs	HEK293_PACight1_PACAP38_A10_A10_010.fcs	stable_HEK293_PAClight1_10	stable_HEK293_PAClight1	10	300	193.2
HEK293_PACight1_PACAP38_A10_A10_010.fcs	HEK293_PACight1_PACAP38_A10_A10_010.fcs	stable_HEK293_PAClight1_10	stable_HEK293_PAClight1	10	300	4545.72
HEK293_PACight1_PACAP38_A10_A10_010.fcs	HEK293_PACight1_PACAP38_A10_A10_010.fcs	stable_HEK293_PAClight1_10	stable_HEK293_PAClight1	10	300	2744.82
HEK293_PACight1_PACAP38_A10_A10_010.fcs	HEK293_PACight1_PACAP38_A10_A10_010.fcs	stable_HEK293_PAClight1_10	stable_HEK293_PAClight1	10	300	6029.22
HEK293_PACight1_PACAP38_A10_A10_010.fcs	HEK293_PACight1_PACAP38_A10_A10_010.fcs	stable_HEK293_PAClight1_10	stable_HEK293_PAClight1	10	300	4385.64
HEK293_PACight1_PACAP38_A10_A10_010.fcs	HEK293_PACight1_PACAP38_A10_A10_010.fcs	stable_HEK293_PAClight1_10	stable_HEK293_PAClight1	10	300	803.16
HEK293_PACight1_PACAP38_A10_A10_010.fcs	HEK293_PACight1_PACAP38_A10_A10_010.fcs	stable_HEK293_PAClight1_10	stable_HEK293_PAClight1	10	300	2715.84
HEK293_PACight1_PACAP38_A10_A10_010.fcs	HEK293_PACight1_PACAP38_A10_A10_010.fcs	stable_HEK293_PAClight1_10	stable_HEK293_PAClight1	10	300	3735.66
HEK293_PACight1_PACAP38_A10_A10_010.fcs	HEK293_PACight1_PACAP38_A10_A10_010.fcs	stable_HEK293_PAClight1_10	stable_HEK293_PAClight1	10	300	1476.6
HEK293_PACight1_PACAP38_A10_A10_010.fcs	HEK293_PACight1_PACAP38_A10_A10_010.fcs	stable_HEK293_PAClight1_10	stable_HEK293_PAClight1	10	300	4606.44
HEK293_PACight1_PACAP38_A10_A10_010.fcs	HEK293_PACight1_PACAP38_A10_A10_010.fcs	stable_HEK293_PAClight1_10	stable_HEK293_PAClight1	10	300	4065.48
HEK293_PACight1_PACAP38_A10_A10_010.fcs	HEK293_PACight1_PACAP38_A10_A10_010.fcs	stable_HEK293_PAClight1_10	stable_HEK293_PAClight1	10	300	208.38
HEK293_PACight1_PACAP38_A10_A10_010.fcs	HEK293_PACight1_PACAP38_A10_A10_010.fcs	stable_HEK293_PAClight1_10	stable_HEK293_PAClight1	10	300	4737.54
HEK293_PACight1_PACAP38_A10_A10_010.fcs	HEK293_PACight1_PACAP38_A10_A10_010.fcs	stable_HEK293_PAClight1_10	stable_HEK293_PAClight1	10	300	8742.3
HEK293_PACight1_PACAP38_A10_A10_010.fcs	HEK293_PACight1_PACAP38_A10_A10_010.fcs	stable_HEK293_PAClight1_10	stable_HEK293_PAClight1	10	300	2696.52
HEK293_PACight1_PACAP38_A10_A10_010.fcs	HEK293_PACight1_PACAP38_A10_A10_010.fcs	stable_HEK293_PAClight1_10	stable_HEK293_PAClight1	10	300	138
HEK293_PACight1_PACAP38_A10_A10_010.fcs	HEK293_PACight1_PACAP38_A10_A10_010.fcs	stable_HEK293_PAClight1_10	stable_HEK293_PAClight1	10	300	4127.58
HEK293_PACight1_PACAP38_A10_A10_010.fcs	HEK293_PACight1_PACAP38_A10_A10_010.fcs	stable_HEK293_PAClight1_10	stable_HEK293_PAClight1	10	300	6285.9
HEK293_PACight1_PACAP38_A10_A10_010.fcs	HEK293_PACight1_PACAP38_A10_A10_010.fcs	stable_HEK293_PAClight1_10	stable_HEK293_PAClight1	10	300	4235.22
HEK293_PACight1_PACAP38_A10_A10_010.fcs	HEK293_PACight1_PACAP38_A10_A10_010.fcs	stable_HEK293_PAClight1_10	stable_HEK293_PAClight1	10	300	3793.62
HEK293_PACight1_PACAP38_A10_A10_010.fcs	HEK293_PACight1_PACAP38_A10_A10_010.fcs	stable_HEK293_PAClight1_10	stable_HEK293_PAClight1	10	300	8035.74
HEK293_PACight1_PACAP38_A10_A10_010.fcs	HEK293_PACight1_PACAP38_A10_A10_010.fcs	stable_HEK293_PAClight1_10	stable_HEK293_PAClight1	10	300	10860.6
HEK293_PACight1_PACAP38_A10_A10_010.fcs	HEK293_PACight1_PACAP38_A10_A10_010.fcs	stable_HEK293_PAClight1_10	stable_HEK293_PAClight1	10	300	2086.56
HEK293_PACight1_PACAP38_A10_A10_010.fcs	HEK293_PACight1_PACAP38_A10_A10_010.fcs	stable_HEK293_PAClight1_10	stable_HEK293_PAClight1	10	300	2460.54
HEK293_PACight1_PACAP38_A10_A10_010.fcs	HEK293_PACight1_PACAP38_A10_A10_010.fcs	stable_HEK293_PAClight1_10	stable_HEK293_PAClight1	10	300	1903.02
HEK293_PACight1_PACAP38_A10_A10_010.fcs	HEK293_PACight1_PACAP38_A10_A10_010.fcs	stable_HEK293_PAClight1_10	stable_HEK293_PAClight1	10	300	4331.82
HEK293_PACight1_PACAP38_A10_A10_010.fcs	HEK293_PACight1_PACAP38_A10_A10_010.fcs	stable_HEK293_PAClight1_10	stable_HEK293_PAClight1	10	300	3734.28
HEK293_PACight1_PACAP38_A10_A10_010.fcs	HEK293_PACight1_PACAP38_A10_A10_010.fcs	stable_HEK293_PAClight1_10	stable_HEK293_PAClight1	10	300	2593.02
HEK293_PACight1_PACAP38_A10_A10_010.fcs	HEK293_PACight1_PACAP38_A10_A10_010.fcs	stable_HEK293_PAClight1_10	stable_HEK293_PAClight1	10	300	1312.38
HEK293_PACight1_PACAP38_A10_A10_010.fcs	HEK293_PACight1_PACAP38_A10_A10_010.fcs	stable_HEK293_PAClight1_10	stable_HEK293_PAClight1	10	300	5550.36
HEK293_PACight1_PACAP38_A10_A10_010.fcs	HEK293_PACight1_PACAP38_A10_A10_010.fcs	stable_HEK293_PAClight1_10	stable_HEK293_PAClight1	10	300	2693.76
HEK293_PACight1_PACAP38_A10_A10_010.fcs	HEK293_PACight1_PACAP38_A10_A10_010.fcs	stable_HEK293_PAClight1_10	stable_HEK293_PAClight1	10	300	12404.8
HEK293_PACight1_PACAP38_A10_A10_010.fcs	HEK293_PACight1_PACAP38_A10_A10_010.fcs	stable_HEK293_PAClight1_10	stable_HEK293_PAClight1	10	300	2290.8
HEK293_PACight1_PACAP38_A10_A10_010.fcs	HEK293_PACight1_PACAP38_A10_A10_010.fcs	stable_HEK293_PAClight1_10	stable_HEK293_PAClight1	10	300	13610.9
HEK293_PACight1_PACAP38_A10_A10_010.fcs	HEK293_PACight1_PACAP38_A10_A10_010.fcs	stable_HEK293_PAClight1_10	stable_HEK293_PAClight1	10	300	5958.84
HEK293_PACight1_PACAP38_A10_A10_010.fcs	HEK293_PACight1_PACAP38_A10_A10_010.fcs	stable_HEK293_PAClight1_10	stable_HEK293_PAClight1	10	300	990.84
HEK293_PACight1_PACAP38_A10_A10_010.fcs	HEK293_PACight1_PACAP38_A10_A10_010.fcs	stable_HEK293_PAClight1_10	stable_HEK293_PAClight1	10	300	2835.9
HEK293_PACight1_PACAP38_A10_A10_010.fcs	HEK293_PACight1_PACAP38_A10_A10_010.fcs	stable_HEK293_PAClight1_10	stable_HEK293_PAClight1	10	300	3225.06
HEK293_PACight1_PACAP38_A10_A10_010.fcs	HEK293_PACight1_PACAP38_A10_A10_010.fcs	stable_HEK293_PAClight1_10	stable_HEK293_PAClight1	10	300	2081.04
HEK293_PACight1_PACAP38_A10_A10_010.fcs	HEK293_PACight1_PACAP38_A10_A10_010.fcs	stable_HEK293_PAClight1_10	stable_HEK293_PAClight1	10	300	2079.66
HEK293_PACight1_PACAP38_A10_A10_010.fcs	HEK293_PACight1_PACAP38_A10_A10_010.fcs	stable_HEK293_PAClight1_10	stable_HEK293_PAClight1	10	300	3575.58
HEK293_PACight1_PACAP38_A10_A10_010.fcs	HEK293_PACight1_PACAP38_A10_A10_010.fcs	stable_HEK293_PAClight1_10	stable_HEK293_PAClight1	10	300	15809.3
HEK293_PACight1_PACAP38_A10_A10_010.fcs	HEK293_PACight1_PACAP38_A10_A10_010.fcs	stable_HEK293_PAClight1_10	stable_HEK293_PAClight1	10	300	5219.16
HEK293_PACight1_PACAP38_A10_A10_010.fcs	HEK293_PACight1_PACAP38_A10_A10_010.fcs	stable_HEK293_PAClight1_10	stable_HEK293_PAClight1	10	300	9977.4
HEK293_PACight1_PACAP38_A10_A10_010.fcs	HEK293_PACight1_PACAP38_A10_A10_010.fcs	stable_HEK293_PAClight1_10	stable_HEK293_PAClight1	10	300	3269.22
HEK293_PACight1_PACAP38_A10_A10_010.fcs	HEK293_PACight1_PACAP38_A10_A10_010.fcs	stable_HEK293_PAClight1_10	stable_HEK293_PAClight1	10	300	1600.8
HEK293_PACight1_PACAP38_A10_A10_010.fcs	HEK293_PACight1_PACAP38_A10_A10_010.fcs	stable_HEK293_PAClight1_10	stable_HEK293_PAClight1	10	300	6730.26
HEK293_PACight1_PACAP38_A10_A10_010.fcs	HEK293_PACight1_PACAP38_A10_A10_010.fcs	stable_HEK293_PAClight1_10	stable_HEK293_PAClight1	10	300	554.76
HEK293_PACight1_PACAP38_A10_A10_010.fcs	HEK293_PACight1_PACAP38_A10_A10_010.fcs	stable_HEK293_PAClight1_10	stable_HEK293_PAClight1	10	300	3706.68
HEK293_PACight1_PACAP38_A10_A10_010.fcs	HEK293_PACight1_PACAP38_A10_A10_010.fcs	stable_HEK293_PAClight1_10	stable_HEK293_PAClight1	10	300	3895.74
HEK293_PACight1_PACAP38_A10_A10_010.fcs	HEK293_PACight1_PACAP38_A10_A10_010.fcs	stable_HEK293_PAClight1_10	stable_HEK293_PAClight1	10	300	3463.8
HEK293_PACight1_PACAP38_A10_A10_010.fcs	HEK293_PACight1_PACAP38_A10_A10_010.fcs	stable_HEK293_PAClight1_10	stable_HEK293_PAClight1	10	300	3692.88
HEK293_PACight1_PACAP38_A10_A10_010.fcs	HEK293_PACight1_PACAP38_A10_A10_010.fcs	stable_HEK293_PAClight1_10	stable_HEK293_PAClight1	10	300	5255.04
HEK293_PACight1_PACAP38_A10_A10_010.fcs	HEK293_PACight1_PACAP38_A10_A10_010.fcs	stable_HEK293_PAClight1_10	stable_HEK293_PAClight1	10	300	3151.92
HEK293_PACight1_PACAP38_A10_A10_010.fcs	HEK293_PACight1_PACAP38_A10_A10_010.fcs	stable_HEK293_PAClight1_10	stable_HEK293_PAClight1	10	300	15667.1
HEK293_PACight1_PACAP38_A10_A10_010.fcs	HEK293_PACight1_PACAP38_A10_A10_010.fcs	stable_HEK293_PAClight1_10	stable_HEK293_PAClight1	10	300	5769.78
HEK293_PACight1_PACAP38_A10_A10_010.fcs	HEK293_PACight1_PACAP38_A10_A10_010.fcs	stable_HEK293_PAClight1_10	stable_HEK293_PAClight1	10	300	6588.12
HEK293_PACight1_PACAP38_A10_A10_010.fcs	HEK293_PACight1_PACAP38_A10_A10_010.fcs	stable_HEK293_PAClight1_10	stable_HEK293_PAClight1	10	300	2337.72
HEK293_PACight1_PACAP38_A10_A10_010.fcs	HEK293_PACight1_PACAP38_A10_A10_010.fcs	stable_HEK293_PAClight1_10	stable_HEK293_PAClight1	10	300	4542.96
HEK293_PACight1_PACAP38_A10_A10_010.fcs	HEK293_PACight1_PACAP38_A10_A10_010.fcs	stable_HEK293_PAClight1_10	stable_HEK293_PAClight1	10	300	7693.5
HEK293_PACight1_PACAP38_A10_A10_010.fcs	HEK293_PACight1_PACAP38_A10_A10_010.fcs	stable_HEK293_PAClight1_10	stable_HEK293_PAClight1	10	300	9619.98
HEK293_PACight1_PACAP38_A10_A10_010.fcs	HEK293_PACight1_PACAP38_A10_A10_010.fcs	stable_HEK293_PAClight1_10	stable_HEK293_PAClight1	10	300	5031.48
HEK293_PACight1_PACAP38_A10_A10_010.fcs	HEK293_PACight1_PACAP38_A10_A10_010.fcs	stable_HEK293_PAClight1_10	stable_HEK293_PAClight1	10	300	3093.96
HEK293_PACight1_PACAP38_A10_A10_010.fcs	HEK293_PACight1_PACAP38_A10_A10_010.fcs	stable_HEK293_PAClight1_10	stable_HEK293_PAClight1	10	300	2902.14
HEK293_PACight1_PACAP38_A10_A10_010.fcs	HEK293_PACight1_PACAP38_A10_A10_010.fcs	stable_HEK293_PAClight1_10	stable_HEK293_PAClight1	10	300	1805.04
HEK293_PACight1_PACAP38_A10_A10_010.fcs	HEK293_PACight1_PACAP38_A10_A10_010.fcs	stable_HEK293_PAClight1_10	stable_HEK293_PAClight1	10	300	2915.94
HEK293_PACight1_PACAP38_A10_A10_010.fcs	HEK293_PACight1_PACAP38_A10_A10_010.fcs	stable_HEK293_PAClight1_10	stable_HEK293_PAClight1	10	300	10806.8
HEK293_PACight1_PACAP38_A10_A10_010.fcs	HEK293_PACight1_PACAP38_A10_A10_010.fcs	stable_HEK293_PAClight1_10	stable_HEK293_PAClight1	10	300	3840.54
HEK293_PACight1_PACAP38_A10_A10_010.fcs	HEK293_PACight1_PACAP38_A10_A10_010.fcs	stable_HEK293_PAClight1_10	stable_HEK293_PAClight1	10	300	4309.74
HEK293_PACight1_PACAP38_A10_A10_010.fcs	HEK293_PACight1_PACAP38_A10_A10_010.fcs	stable_HEK293_PAClight1_10	stable_HEK293_PAClight1	10	300	6563.28
HEK293_PACight1_PACAP38_A10_A10_010.fcs	HEK293_PACight1_PACAP38_A10_A10_010.fcs	stable_HEK293_PAClight1_10	stable_HEK293_PAClight1	10	300	2006.52
HEK293_PACight1_PACAP38_A10_A10_010.fcs	HEK293_PACight1_PACAP38_A10_A10_010.fcs	stable_HEK293_PAClight1_10	stable_HEK293_PAClight1	10	300	3088.44
HEK293_PACight1_PACAP38_A10_A10_010.fcs	HEK293_PACight1_PACAP38_A10_A10_010.fcs	stable_HEK293_PAClight1_10	stable_HEK293_PAClight1	10	300	5125.32
HEK293_PACight1_PACAP38_A10_A10_010.fcs	HEK293_PACight1_PACAP38_A10_A10_010.fcs	stable_HEK293_PAClight1_10	stable_HEK293_PAClight1	10	300	4493.28
HEK293_PACight1_PACAP38_A10_A10_010.fcs	HEK293_PACight1_PACAP38_A10_A10_010.fcs	stable_HEK293_PAClight1_10	stable_HEK293_PAClight1	10	300	3287.16
HEK293_PACight1_PACAP38_A10_A10_010.fcs	HEK293_PACight1_PACAP38_A10_A10_010.fcs	stable_HEK293_PAClight1_10	stable_HEK293_PAClight1	10	300	4411.86
HEK293_PACight1_PACAP38_A10_A10_010.fcs	HEK293_PACight1_PACAP38_A10_A10_010.fcs	stable_HEK293_PAClight1_10	stable_HEK293_PAClight1	10	300	598.92
HEK293_PACight1_PACAP38_A10_A10_010.fcs	HEK293_PACight1_PACAP38_A10_A10_010.fcs	stable_HEK293_PAClight1_10	stable_HEK293_PAClight1	10	300	8460.78
HEK293_PACight1_PACAP38_A10_A10_010.fcs	HEK293_PACight1_PACAP38_A10_A10_010.fcs	stable_HEK293_PAClight1_10	stable_HEK293_PAClight1	10	300	1477.98
HEK293_PACight1_PACAP38_A10_A10_010.fcs	HEK293_PACight1_PACAP38_A10_A10_010.fcs	stable_HEK293_PAClight1_10	stable_HEK293_PAClight1	10	300	2826.24
HEK293_PACight1_PACAP38_A10_A10_010.fcs	HEK293_PACight1_PACAP38_A10_A10_010.fcs	stable_HEK293_PAClight1_10	stable_HEK293_PAClight1	10	300	8289.66
HEK293_PACight1_PACAP38_A10_A10_010.fcs	HEK293_PACight1_PACAP38_A10_A10_010.fcs	stable_HEK293_PAClight1_10	stable_HEK293_PAClight1	10	300	4261.44
HEK293_PACight1_PACAP38_A10_A10_010.fcs	HEK293_PACight1_PACAP38_A10_A10_010.fcs	stable_HEK293_PAClight1_10	stable_HEK293_PAClight1	10	300	2515.74
HEK293_PACight1_PACAP38_A10_A10_010.fcs	HEK293_PACight1_PACAP38_A10_A10_010.fcs	stable_HEK293_PAClight1_10	stable_HEK293_PAClight1	10	300	518.88
HEK293_PACight1_PACAP38_A10_A10_010.fcs	HEK293_PACight1_PACAP38_A10_A10_010.fcs	stable_HEK293_PAClight1_10	stable_HEK293_PAClight1	10	300	1121.94
HEK293_PACight1_PACAP38_A10_A10_010.fcs	HEK293_PACight1_PACAP38_A10_A10_010.fcs	stable_HEK293_PAClight1_10	stable_HEK293_PAClight1	10	300	4578.84
HEK293_PACight1_PACAP38_A10_A10_010.fcs	HEK293_PACight1_PACAP38_A10_A10_010.fcs	stable_HEK293_PAClight1_10	stable_HEK293_PAClight1	10	300	122.82
HEK293_PACight1_PACAP38_A10_A10_010.fcs	HEK293_PACight1_PACAP38_A10_A10_010.fcs	stable_HEK293_PAClight1_10	stable_HEK293_PAClight1	10	300	5704.92
HEK293_PACight1_PACAP38_A10_A10_010.fcs	HEK293_PACight1_PACAP38_A10_A10_010.fcs	stable_HEK293_PAClight1_10	stable_HEK293_PAClight1	10	300	7883.94
HEK293_PACight1_PACAP38_A10_A10_010.fcs	HEK293_PACight1_PACAP38_A10_A10_010.fcs	stable_HEK293_PAClight1_10	stable_HEK293_PAClight1	10	300	3701.16
HEK293_PACight1_PACAP38_A10_A10_010.fcs	HEK293_PACight1_PACAP38_A10_A10_010.fcs	stable_HEK293_PAClight1_10	stable_HEK293_PAClight1	10	300	5947.8
HEK293_PACight1_PACAP38_A10_A10_010.fcs	HEK293_PACight1_PACAP38_A10_A10_010.fcs	stable_HEK293_PAClight1_10	stable_HEK293_PAClight1	10	300	2318.4
HEK293_PACight1_PACAP38_A10_A10_010.fcs	HEK293_PACight1_PACAP38_A10_A10_010.fcs	stable_HEK293_PAClight1_10	stable_HEK293_PAClight1	10	300	291.18
HEK293_PACight1_PACAP38_A10_A10_010.fcs	HEK293_PACight1_PACAP38_A10_A10_010.fcs	stable_HEK293_PAClight1_10	stable_HEK293_PAClight1	10	300	2514.36
HEK293_PACight1_PACAP38_A10_A10_010.fcs	HEK293_PACight1_PACAP38_A10_A10_010.fcs	stable_HEK293_PAClight1_10	stable_HEK293_PAClight1	10	300	4352.52
HEK293_PACight1_PACAP38_A10_A10_010.fcs	HEK293_PACight1_PACAP38_A10_A10_010.fcs	stable_HEK293_PAClight1_10	stable_HEK293_PAClight1	10	300	139.38
HEK293_PACight1_PACAP38_A10_A10_010.fcs	HEK293_PACight1_PACAP38_A10_A10_010.fcs	stable_HEK293_PAClight1_10	stable_HEK293_PAClight1	10	300	3093.96
HEK293_PACight1_PACAP38_A10_A10_010.fcs	HEK293_PACight1_PACAP38_A10_A10_010.fcs	stable_HEK293_PAClight1_10	stable_HEK293_PAClight1	10	300	2368.08
HEK293_PACight1_PACAP38_A10_A10_010.fcs	HEK293_PACight1_PACAP38_A10_A10_010.fcs	stable_HEK293_PAClight1_10	stable_HEK293_PAClight1	10	300	4433.94
HEK293_PACight1_PACAP38_A10_A10_010.fcs	HEK293_PACight1_PACAP38_A10_A10_010.fcs	stable_HEK293_PAClight1_10	stable_HEK293_PAClight1	10	300	7616.22
HEK293_PACight1_PACAP38_A10_A10_010.fcs	HEK293_PACight1_PACAP38_A10_A10_010.fcs	stable_HEK293_PAClight1_10	stable_HEK293_PAClight1	10	300	4242.12
HEK293_PACight1_PACAP38_A10_A10_010.fcs	HEK293_PACight1_PACAP38_A10_A10_010.fcs	stable_HEK293_PAClight1_10	stable_HEK293_PAClight1	10	300	5845.68
HEK293_PACight1_PACAP38_A10_A10_010.fcs	HEK293_PACight1_PACAP38_A10_A10_010.fcs	stable_HEK293_PAClight1_10	stable_HEK293_PAClight1	10	300	3441.72
HEK293_PACight1_PACAP38_A10_A10_010.fcs	HEK293_PACight1_PACAP38_A10_A10_010.fcs	stable_HEK293_PAClight1_10	stable_HEK293_PAClight1	10	300	4852.08
HEK293_PACight1_PACAP38_A10_A10_010.fcs	HEK293_PACight1_PACAP38_A10_A10_010.fcs	stable_HEK293_PAClight1_10	stable_HEK293_PAClight1	10	300	1847.82
HEK293_PACight1_PACAP38_A10_A10_010.fcs	HEK293_PACight1_PACAP38_A10_A10_010.fcs	stable_HEK293_PAClight1_10	stable_HEK293_PAClight1	10	300	3883.32
HEK293_PACight1_PACAP38_A10_A10_010.fcs	HEK293_PACight1_PACAP38_A10_A10_010.fcs	stable_HEK293_PAClight1_10	stable_HEK293_PAClight1	10	300	4494.66
HEK293_PACight1_PACAP38_A10_A10_010.fcs	HEK293_PACight1_PACAP38_A10_A10_010.fcs	stable_HEK293_PAClight1_10	stable_HEK293_PAClight1	10	300	10479.7
HEK293_PACight1_PACAP38_A10_A10_010.fcs	HEK293_PACight1_PACAP38_A10_A10_010.fcs	stable_HEK293_PAClight1_10	stable_HEK293_PAClight1	10	300	7236.72
HEK293_PACight1_PACAP38_A10_A10_010.fcs	HEK293_PACight1_PACAP38_A10_A10_010.fcs	stable_HEK293_PAClight1_10	stable_HEK293_PAClight1	10	300	3952.32
HEK293_PACight1_PACAP38_A10_A10_010.fcs	HEK293_PACight1_PACAP38_A10_A10_010.fcs	stable_HEK293_PAClight1_10	stable_HEK293_PAClight1	10	300	179.4
HEK293_PACight1_PACAP38_A10_A10_010.fcs	HEK293_PACight1_PACAP38_A10_A10_010.fcs	stable_HEK293_PAClight1_10	stable_HEK293_PAClight1	10	300	3396.18
HEK293_PACight1_PACAP38_A10_A10_010.fcs	HEK293_PACight1_PACAP38_A10_A10_010.fcs	stable_HEK293_PAClight1_10	stable_HEK293_PAClight1	10	300	12044.6
HEK293_PACight1_PACAP38_A10_A10_010.fcs	HEK293_PACight1_PACAP38_A10_A10_010.fcs	stable_HEK293_PAClight1_10	stable_HEK293_PAClight1	10	300	3196.08
HEK293_PACight1_PACAP38_A10_A10_010.fcs	HEK293_PACight1_PACAP38_A10_A10_010.fcs	stable_HEK293_PAClight1_10	stable_HEK293_PAClight1	10	300	34040.5
HEK293_PACight1_PACAP38_A10_A10_010.fcs	HEK293_PACight1_PACAP38_A10_A10_010.fcs	stable_HEK293_PAClight1_10	stable_HEK293_PAClight1	10	300	681.72
HEK293_PACight1_PACAP38_A10_A10_010.fcs	HEK293_PACight1_PACAP38_A10_A10_010.fcs	stable_HEK293_PAClight1_10	stable_HEK293_PAClight1	10	300	8856.84
HEK293_PACight1_PACAP38_A10_A10_010.fcs	HEK293_PACight1_PACAP38_A10_A10_010.fcs	stable_HEK293_PAClight1_10	stable_HEK293_PAClight1	10	300	5324.04
HEK293_PACight1_PACAP38_A10_A10_010.fcs	HEK293_PACight1_PACAP38_A10_A10_010.fcs	stable_HEK293_PAClight1_10	stable_HEK293_PAClight1	10	300	2159.7
HEK293_PACight1_PACAP38_A10_A10_010.fcs	HEK293_PACight1_PACAP38_A10_A10_010.fcs	stable_HEK293_PAClight1_10	stable_HEK293_PAClight1	10	300	155.94
HEK293_PACight1_PACAP38_A10_A10_010.fcs	HEK293_PACight1_PACAP38_A10_A10_010.fcs	stable_HEK293_PAClight1_10	stable_HEK293_PAClight1	10	300	9654.48
HEK293_PACight1_PACAP38_A10_A10_010.fcs	HEK293_PACight1_PACAP38_A10_A10_010.fcs	stable_HEK293_PAClight1_10	stable_HEK293_PAClight1	10	300	480.24
HEK293_PACight1_PACAP38_A10_A10_010.fcs	HEK293_PACight1_PACAP38_A10_A10_010.fcs	stable_HEK293_PAClight1_10	stable_HEK293_PAClight1	10	300	1534.56
HEK293_PACight1_PACAP38_A10_A10_010.fcs	HEK293_PACight1_PACAP38_A10_A10_010.fcs	stable_HEK293_PAClight1_10	stable_HEK293_PAClight1	10	300	5110.14
HEK293_PACight1_PACAP38_A10_A10_010.fcs	HEK293_PACight1_PACAP38_A10_A10_010.fcs	stable_HEK293_PAClight1_10	stable_HEK293_PAClight1	10	300	2579.22
HEK293_PACight1_PACAP38_A10_A10_010.fcs	HEK293_PACight1_PACAP38_A10_A10_010.fcs	stable_HEK293_PAClight1_10	stable_HEK293_PAClight1	10	300	7222.92
HEK293_PACight1_PACAP38_A10_A10_010.fcs	HEK293_PACight1_PACAP38_A10_A10_010.fcs	stable_HEK293_PAClight1_10	stable_HEK293_PAClight1	10	300	2863.5
HEK293_PACight1_PACAP38_A10_A10_010.fcs	HEK293_PACight1_PACAP38_A10_A10_010.fcs	stable_HEK293_PAClight1_10	stable_HEK293_PAClight1	10	300	3182.28
HEK293_PACight1_PACAP38_A10_A10_010.fcs	HEK293_PACight1_PACAP38_A10_A10_010.fcs	stable_HEK293_PAClight1_10	stable_HEK293_PAClight1	10	300	2583.36
HEK293_PACight1_PACAP38_A10_A10_010.fcs	HEK293_PACight1_PACAP38_A10_A10_010.fcs	stable_HEK293_PAClight1_10	stable_HEK293_PAClight1	10	300	5086.68
HEK293_PACight1_PACAP38_A10_A10_010.fcs	HEK293_PACight1_PACAP38_A10_A10_010.fcs	stable_HEK293_PAClight1_10	stable_HEK293_PAClight1	10	300	5638.68
HEK293_PACight1_PACAP38_A10_A10_010.fcs	HEK293_PACight1_PACAP38_A10_A10_010.fcs	stable_HEK293_PAClight1_10	stable_HEK293_PAClight1	10	300	4642.32
HEK293_PACight1_PACAP38_A10_A10_010.fcs	HEK293_PACight1_PACAP38_A10_A10_010.fcs	stable_HEK293_PAClight1_10	stable_HEK293_PAClight1	10	300	598.92
HEK293_PACight1_PACAP38_A10_A10_010.fcs	HEK293_PACight1_PACAP38_A10_A10_010.fcs	stable_HEK293_PAClight1_10	stable_HEK293_PAClight1	10	300	3478.98
HEK293_PACight1_PACAP38_A10_A10_010.fcs	HEK293_PACight1_PACAP38_A10_A10_010.fcs	stable_HEK293_PAClight1_10	stable_HEK293_PAClight1	10	300	7461.66
HEK293_PACight1_PACAP38_A10_A10_010.fcs	HEK293_PACight1_PACAP38_A10_A10_010.fcs	stable_HEK293_PAClight1_10	stable_HEK293_PAClight1	10	300	1799.52
HEK293_PACight1_PACAP38_A10_A10_010.fcs	HEK293_PACight1_PACAP38_A10_A10_010.fcs	stable_HEK293_PAClight1_10	stable_HEK293_PAClight1	10	300	9844.92
HEK293_PACight1_PACAP38_A10_A10_010.fcs	HEK293_PACight1_PACAP38_A10_A10_010.fcs	stable_HEK293_PAClight1_10	stable_HEK293_PAClight1	10	300	4541.58
HEK293_PACight1_PACAP38_A10_A10_010.fcs	HEK293_PACight1_PACAP38_A10_A10_010.fcs	stable_HEK293_PAClight1_10	stable_HEK293_PAClight1	10	300	7434.06
HEK293_PACight1_PACAP38_A10_A10_010.fcs	HEK293_PACight1_PACAP38_A10_A10_010.fcs	stable_HEK293_PAClight1_10	stable_HEK293_PAClight1	10	300	5119.8
HEK293_PACight1_PACAP38_A10_A10_010.fcs	HEK293_PACight1_PACAP38_A10_A10_010.fcs	stable_HEK293_PAClight1_10	stable_HEK293_PAClight1	10	300	2497.8
HEK293_PACight1_PACAP38_A10_A10_010.fcs	HEK293_PACight1_PACAP38_A10_A10_010.fcs	stable_HEK293_PAClight1_10	stable_HEK293_PAClight1	10	300	2655.12
HEK293_PACight1_PACAP38_A10_A10_010.fcs	HEK293_PACight1_PACAP38_A10_A10_010.fcs	stable_HEK293_PAClight1_10	stable_HEK293_PAClight1	10	300	3988.2
HEK293_PACight1_PACAP38_A10_A10_010.fcs	HEK293_PACight1_PACAP38_A10_A10_010.fcs	stable_HEK293_PAClight1_10	stable_HEK293_PAClight1	10	300	2061.72
HEK293_PACight1_PACAP38_A10_A10_010.fcs	HEK293_PACight1_PACAP38_A10_A10_010.fcs	stable_HEK293_PAClight1_10	stable_HEK293_PAClight1	10	300	8469.06
HEK293_PACight1_PACAP38_A10_A10_010.fcs	HEK293_PACight1_PACAP38_A10_A10_010.fcs	stable_HEK293_PAClight1_10	stable_HEK293_PAClight1	10	300	2667.54
HEK293_PACight1_PACAP38_A10_A10_010.fcs	HEK293_PACight1_PACAP38_A10_A10_010.fcs	stable_HEK293_PAClight1_10	stable_HEK293_PAClight1	10	300	7057.32
HEK293_PACight1_PACAP38_A10_A10_010.fcs	HEK293_PACight1_PACAP38_A10_A10_010.fcs	stable_HEK293_PAClight1_10	stable_HEK293_PAClight1	10	300	4047.54
HEK293_PACight1_PACAP38_A10_A10_010.fcs	HEK293_PACight1_PACAP38_A10_A10_010.fcs	stable_HEK293_PAClight1_10	stable_HEK293_PAClight1	10	300	2840.04
HEK293_PACight1_PACAP38_A10_A10_010.fcs	HEK293_PACight1_PACAP38_A10_A10_010.fcs	stable_HEK293_PAClight1_10	stable_HEK293_PAClight1	10	300	5459.28
HEK293_PACight1_PACAP38_A10_A10_010.fcs	HEK293_PACight1_PACAP38_A10_A10_010.fcs	stable_HEK293_PAClight1_10	stable_HEK293_PAClight1	10	300	2470.2
HEK293_PACight1_PACAP38_A10_A10_010.fcs	HEK293_PACight1_PACAP38_A10_A10_010.fcs	stable_HEK293_PAClight1_10	stable_HEK293_PAClight1	10	300	3292.68
HEK293_PACight1_PACAP38_A10_A10_010.fcs	HEK293_PACight1_PACAP38_A10_A10_010.fcs	stable_HEK293_PAClight1_10	stable_HEK293_PAClight1	10	300	4627.14
HEK293_PACight1_PACAP38_A10_A10_010.fcs	HEK293_PACight1_PACAP38_A10_A10_010.fcs	stable_HEK293_PAClight1_10	stable_HEK293_PAClight1	10	300	5837.4
HEK293_PACight1_PACAP38_A10_A10_010.fcs	HEK293_PACight1_PACAP38_A10_A10_010.fcs	stable_HEK293_PAClight1_10	stable_HEK293_PAClight1	10	300	4745.82
HEK293_PACight1_PACAP38_A10_A10_010.fcs	HEK293_PACight1_PACAP38_A10_A10_010.fcs	stable_HEK293_PAClight1_10	stable_HEK293_PAClight1	10	300	17.94
HEK293_PACight1_PACAP38_A10_A10_010.fcs	HEK293_PACight1_PACAP38_A10_A10_010.fcs	stable_HEK293_PAClight1_10	stable_HEK293_PAClight1	10	300	4698.9
HEK293_PACight1_PACAP38_A10_A10_010.fcs	HEK293_PACight1_PACAP38_A10_A10_010.fcs	stable_HEK293_PAClight1_10	stable_HEK293_PAClight1	10	300	3190.56
HEK293_PACight1_PACAP38_A10_A10_010.fcs	HEK293_PACight1_PACAP38_A10_A10_010.fcs	stable_HEK293_PAClight1_10	stable_HEK293_PAClight1	10	300	6277.62
HEK293_PACight1_PACAP38_A10_A10_010.fcs	HEK293_PACight1_PACAP38_A10_A10_010.fcs	stable_HEK293_PAClight1_10	stable_HEK293_PAClight1	10	300	4690.62
HEK293_PACight1_PACAP38_A10_A10_010.fcs	HEK293_PACight1_PACAP38_A10_A10_010.fcs	stable_HEK293_PAClight1_10	stable_HEK293_PAClight1	10	300	10910.3
HEK293_PACight1_PACAP38_A10_A10_010.fcs	HEK293_PACight1_PACAP38_A10_A10_010.fcs	stable_HEK293_PAClight1_10	stable_HEK293_PAClight1	10	300	86.94
HEK293_PACight1_PACAP38_A10_A10_010.fcs	HEK293_PACight1_PACAP38_A10_A10_010.fcs	stable_HEK293_PAClight1_10	stable_HEK293_PAClight1	10	300	5976.78
HEK293_PACight1_PACAP38_A10_A10_010.fcs	HEK293_PACight1_PACAP38_A10_A10_010.fcs	stable_HEK293_PAClight1_10	stable_HEK293_PAClight1	10	300	4199.34
HEK293_PACight1_PACAP38_A10_A10_010.fcs	HEK293_PACight1_PACAP38_A10_A10_010.fcs	stable_HEK293_PAClight1_10	stable_HEK293_PAClight1	10	300	5870.52
HEK293_PACight1_PACAP38_A10_A10_010.fcs	HEK293_PACight1_PACAP38_A10_A10_010.fcs	stable_HEK293_PAClight1_10	stable_HEK293_PAClight1	10	300	2753.1
HEK293_PACight1_PACAP38_A10_A10_010.fcs	HEK293_PACight1_PACAP38_A10_A10_010.fcs	stable_HEK293_PAClight1_10	stable_HEK293_PAClight1	10	300	3452.76
HEK293_PACight1_PACAP38_A10_A10_010.fcs	HEK293_PACight1_PACAP38_A10_A10_010.fcs	stable_HEK293_PAClight1_10	stable_HEK293_PAClight1	10	300	3382.38
HEK293_PACight1_PACAP38_A10_A10_010.fcs	HEK293_PACight1_PACAP38_A10_A10_010.fcs	stable_HEK293_PAClight1_10	stable_HEK293_PAClight1	10	300	8252.4
HEK293_PACight1_PACAP38_A10_A10_010.fcs	HEK293_PACight1_PACAP38_A10_A10_010.fcs	stable_HEK293_PAClight1_10	stable_HEK293_PAClight1	10	300	5638.68
HEK293_PACight1_PACAP38_A10_A10_010.fcs	HEK293_PACight1_PACAP38_A10_A10_010.fcs	stable_HEK293_PAClight1_10	stable_HEK293_PAClight1	10	300	5849.82
HEK293_PACight1_PACAP38_A10_A10_010.fcs	HEK293_PACight1_PACAP38_A10_A10_010.fcs	stable_HEK293_PAClight1_10	stable_HEK293_PAClight1	10	300	14122.9
HEK293_PACight1_PACAP38_A10_A10_010.fcs	HEK293_PACight1_PACAP38_A10_A10_010.fcs	stable_HEK293_PAClight1_10	stable_HEK293_PAClight1	10	300	4123.44
HEK293_PACight1_PACAP38_A10_A10_010.fcs	HEK293_PACight1_PACAP38_A10_A10_010.fcs	stable_HEK293_PAClight1_10	stable_HEK293_PAClight1	10	300	5842.92
HEK293_PACight1_PACAP38_A10_A10_010.fcs	HEK293_PACight1_PACAP38_A10_A10_010.fcs	stable_HEK293_PAClight1_10	stable_HEK293_PAClight1	10	300	7073.88
HEK293_PACight1_PACAP38_A10_A10_010.fcs	HEK293_PACight1_PACAP38_A10_A10_010.fcs	stable_HEK293_PAClight1_10	stable_HEK293_PAClight1	10	300	14034.6
HEK293_PACight1_PACAP38_A10_A10_010.fcs	HEK293_PACight1_PACAP38_A10_A10_010.fcs	stable_HEK293_PAClight1_10	stable_HEK293_PAClight1	10	300	4910.04
HEK293_PACight1_PACAP38_A10_A10_010.fcs	HEK293_PACight1_PACAP38_A10_A10_010.fcs	stable_HEK293_PAClight1_10	stable_HEK293_PAClight1	10	300	3645.96
HEK293_PACight1_PACAP38_A10_A10_010.fcs	HEK293_PACight1_PACAP38_A10_A10_010.fcs	stable_HEK293_PAClight1_10	stable_HEK293_PAClight1	10	300	40925.3
HEK293_PACight1_PACAP38_A10_A10_010.fcs	HEK293_PACight1_PACAP38_A10_A10_010.fcs	stable_HEK293_PAClight1_10	stable_HEK293_PAClight1	10	300	5877.42
HEK293_PACight1_PACAP38_A10_A10_010.fcs	HEK293_PACight1_PACAP38_A10_A10_010.fcs	stable_HEK293_PAClight1_10	stable_HEK293_PAClight1	10	300	8264.82
HEK293_PACight1_PACAP38_A10_A10_010.fcs	HEK293_PACight1_PACAP38_A10_A10_010.fcs	stable_HEK293_PAClight1_10	stable_HEK293_PAClight1	10	300	4745.82
HEK293_PACight1_PACAP38_A10_A10_010.fcs	HEK293_PACight1_PACAP38_A10_A10_010.fcs	stable_HEK293_PAClight1_10	stable_HEK293_PAClight1	10	300	49779.4
HEK293_PACight1_PACAP38_A10_A10_010.fcs	HEK293_PACight1_PACAP38_A10_A10_010.fcs	stable_HEK293_PAClight1_10	stable_HEK293_PAClight1	10	300	5310.24
HEK293_PACight1_PACAP38_A10_A10_010.fcs	HEK293_PACight1_PACAP38_A10_A10_010.fcs	stable_HEK293_PAClight1_10	stable_HEK293_PAClight1	10	300	4743.06
HEK293_PACight1_PACAP38_A10_A10_010.fcs	HEK293_PACight1_PACAP38_A10_A10_010.fcs	stable_HEK293_PAClight1_10	stable_HEK293_PAClight1	10	300	3536.94
HEK293_PACight1_PACAP38_A10_A10_010.fcs	HEK293_PACight1_PACAP38_A10_A10_010.fcs	stable_HEK293_PAClight1_10	stable_HEK293_PAClight1	10	300	9033.48
HEK293_PACight1_PACAP38_A10_A10_010.fcs	HEK293_PACight1_PACAP38_A10_A10_010.fcs	stable_HEK293_PAClight1_10	stable_HEK293_PAClight1	10	300	6045.78
HEK293_PACight1_PACAP38_A10_A10_010.fcs	HEK293_PACight1_PACAP38_A10_A10_010.fcs	stable_HEK293_PAClight1_10	stable_HEK293_PAClight1	10	300	2725.5
HEK293_PACight1_PACAP38_A10_A10_010.fcs	HEK293_PACight1_PACAP38_A10_A10_010.fcs	stable_HEK293_PAClight1_10	stable_HEK293_PAClight1	10	300	6635.04
HEK293_PACight1_PACAP38_A10_A10_010.fcs	HEK293_PACight1_PACAP38_A10_A10_010.fcs	stable_HEK293_PAClight1_10	stable_HEK293_PAClight1	10	300	5575.2
HEK293_PACight1_PACAP38_A10_A10_010.fcs	HEK293_PACight1_PACAP38_A10_A10_010.fcs	stable_HEK293_PAClight1_10	stable_HEK293_PAClight1	10	300	5431.68
HEK293_PACight1_PACAP38_A10_A10_010.fcs	HEK293_PACight1_PACAP38_A10_A10_010.fcs	stable_HEK293_PAClight1_10	stable_HEK293_PAClight1	10	300	8364.18
HEK293_PACight1_PACAP38_A10_A10_010.fcs	HEK293_PACight1_PACAP38_A10_A10_010.fcs	stable_HEK293_PAClight1_10	stable_HEK293_PAClight1	10	300	5546.22
HEK293_PACight1_PACAP38_A10_A10_010.fcs	HEK293_PACight1_PACAP38_A10_A10_010.fcs	stable_HEK293_PAClight1_10	stable_HEK293_PAClight1	10	300	6567.42
HEK293_PACight1_PACAP38_A10_A10_010.fcs	HEK293_PACight1_PACAP38_A10_A10_010.fcs	stable_HEK293_PAClight1_10	stable_HEK293_PAClight1	10	300	897
HEK293_PACight1_PACAP38_A10_A10_010.fcs	HEK293_PACight1_PACAP38_A10_A10_010.fcs	stable_HEK293_PAClight1_10	stable_HEK293_PAClight1	10	300	3832.26
HEK293_PACight1_PACAP38_A10_A10_010.fcs	HEK293_PACight1_PACAP38_A10_A10_010.fcs	stable_HEK293_PAClight1_10	stable_HEK293_PAClight1	10	300	4082.04
HEK293_PACight1_PACAP38_A10_A10_010.fcs	HEK293_PACight1_PACAP38_A10_A10_010.fcs	stable_HEK293_PAClight1_10	stable_HEK293_PAClight1	10	300	1457.28
HEK293_PACight1_PACAP38_A10_A10_010.fcs	HEK293_PACight1_PACAP38_A10_A10_010.fcs	stable_HEK293_PAClight1_10	stable_HEK293_PAClight1	10	300	810.06
HEK293_PACight1_PACAP38_A10_A10_010.fcs	HEK293_PACight1_PACAP38_A10_A10_010.fcs	stable_HEK293_PAClight1_10	stable_HEK293_PAClight1	10	300	9458.52
HEK293_PACight1_PACAP38_A10_A10_010.fcs	HEK293_PACight1_PACAP38_A10_A10_010.fcs	stable_HEK293_PAClight1_10	stable_HEK293_PAClight1	10	300	7508.58
HEK293_PACight1_PACAP38_A10_A10_010.fcs	HEK293_PACight1_PACAP38_A10_A10_010.fcs	stable_HEK293_PAClight1_10	stable_HEK293_PAClight1	10	300	563.04
HEK293_PACight1_PACAP38_A10_A10_010.fcs	HEK293_PACight1_PACAP38_A10_A10_010.fcs	stable_HEK293_PAClight1_10	stable_HEK293_PAClight1	10	300	5905.02
HEK293_PACight1_PACAP38_A10_A10_010.fcs	HEK293_PACight1_PACAP38_A10_A10_010.fcs	stable_HEK293_PAClight1_10	stable_HEK293_PAClight1	10	300	2849.7
HEK293_PACight1_PACAP38_A10_A10_010.fcs	HEK293_PACight1_PACAP38_A10_A10_010.fcs	stable_HEK293_PAClight1_10	stable_HEK293_PAClight1	10	300	6789.6
HEK293_PACight1_PACAP38_A10_A10_010.fcs	HEK293_PACight1_PACAP38_A10_A10_010.fcs	stable_HEK293_PAClight1_10	stable_HEK293_PAClight1	10	300	5217.78
HEK293_PACight1_PACAP38_A10_A10_010.fcs	HEK293_PACight1_PACAP38_A10_A10_010.fcs	stable_HEK293_PAClight1_10	stable_HEK293_PAClight1	10	300	7438.2
HEK293_PACight1_PACAP38_A10_A10_010.fcs	HEK293_PACight1_PACAP38_A10_A10_010.fcs	stable_HEK293_PAClight1_10	stable_HEK293_PAClight1	10	300	248.4
HEK293_PACight1_PACAP38_A10_A10_010.fcs	HEK293_PACight1_PACAP38_A10_A10_010.fcs	stable_HEK293_PAClight1_10	stable_HEK293_PAClight1	10	300	2591.64
HEK293_PACight1_PACAP38_A10_A10_010.fcs	HEK293_PACight1_PACAP38_A10_A10_010.fcs	stable_HEK293_PAClight1_10	stable_HEK293_PAClight1	10	300	4323.54
HEK293_PACight1_PACAP38_A10_A10_010.fcs	HEK293_PACight1_PACAP38_A10_A10_010.fcs	stable_HEK293_PAClight1_10	stable_HEK293_PAClight1	10	300	6826.86
HEK293_PACight1_PACAP38_A10_A10_010.fcs	HEK293_PACight1_PACAP38_A10_A10_010.fcs	stable_HEK293_PAClight1_10	stable_HEK293_PAClight1	10	300	2947.68
HEK293_PACight1_PACAP38_A10_A10_010.fcs	HEK293_PACight1_PACAP38_A10_A10_010.fcs	stable_HEK293_PAClight1_10	stable_HEK293_PAClight1	10	300	5307.48
HEK293_PACight1_PACAP38_A10_A10_010.fcs	HEK293_PACight1_PACAP38_A10_A10_010.fcs	stable_HEK293_PAClight1_10	stable_HEK293_PAClight1	10	300	6429.42
HEK293_PACight1_PACAP38_A10_A10_010.fcs	HEK293_PACight1_PACAP38_A10_A10_010.fcs	stable_HEK293_PAClight1_10	stable_HEK293_PAClight1	10	300	7449.24
HEK293_PACight1_PACAP38_A10_A10_010.fcs	HEK293_PACight1_PACAP38_A10_A10_010.fcs	stable_HEK293_PAClight1_10	stable_HEK293_PAClight1	10	300	746.58
HEK293_PACight1_PACAP38_A10_A10_010.fcs	HEK293_PACight1_PACAP38_A10_A10_010.fcs	stable_HEK293_PAClight1_10	stable_HEK293_PAClight1	10	300	3416.88
HEK293_PACight1_PACAP38_A10_A10_010.fcs	HEK293_PACight1_PACAP38_A10_A10_010.fcs	stable_HEK293_PAClight1_10	stable_HEK293_PAClight1	10	300	3227.82
HEK293_PACight1_PACAP38_A10_A10_010.fcs	HEK293_PACight1_PACAP38_A10_A10_010.fcs	stable_HEK293_PAClight1_10	stable_HEK293_PAClight1	10	300	2656.5
HEK293_PACight1_PACAP38_A10_A10_010.fcs	HEK293_PACight1_PACAP38_A10_A10_010.fcs	stable_HEK293_PAClight1_10	stable_HEK293_PAClight1	10	300	4007.52
HEK293_PACight1_PACAP38_A10_A10_010.fcs	HEK293_PACight1_PACAP38_A10_A10_010.fcs	stable_HEK293_PAClight1_10	stable_HEK293_PAClight1	10	300	7849.44
HEK293_PACight1_PACAP38_A10_A10_010.fcs	HEK293_PACight1_PACAP38_A10_A10_010.fcs	stable_HEK293_PAClight1_10	stable_HEK293_PAClight1	10	300	4330.44
HEK293_PACight1_PACAP38_A10_A10_010.fcs	HEK293_PACight1_PACAP38_A10_A10_010.fcs	stable_HEK293_PAClight1_10	stable_HEK293_PAClight1	10	300	3547.98
HEK293_PACight1_PACAP38_A10_A10_010.fcs	HEK293_PACight1_PACAP38_A10_A10_010.fcs	stable_HEK293_PAClight1_10	stable_HEK293_PAClight1	10	300	8364.18
HEK293_PACight1_PACAP38_A10_A10_010.fcs	HEK293_PACight1_PACAP38_A10_A10_010.fcs	stable_HEK293_PAClight1_10	stable_HEK293_PAClight1	10	300	2368.08
HEK293_PACight1_PACAP38_A10_A10_010.fcs	HEK293_PACight1_PACAP38_A10_A10_010.fcs	stable_HEK293_PAClight1_10	stable_HEK293_PAClight1	10	300	4087.56
HEK293_PACight1_PACAP38_A10_A10_010.fcs	HEK293_PACight1_PACAP38_A10_A10_010.fcs	stable_HEK293_PAClight1_10	stable_HEK293_PAClight1	10	300	4246.26
HEK293_PACight1_PACAP38_A10_A10_010.fcs	HEK293_PACight1_PACAP38_A10_A10_010.fcs	stable_HEK293_PAClight1_10	stable_HEK293_PAClight1	10	300	1331.7
HEK293_PACight1_PACAP38_A10_A10_010.fcs	HEK293_PACight1_PACAP38_A10_A10_010.fcs	stable_HEK293_PAClight1_10	stable_HEK293_PAClight1	10	300	5163.96
HEK293_PACight1_PACAP38_A10_A10_010.fcs	HEK293_PACight1_PACAP38_A10_A10_010.fcs	stable_HEK293_PAClight1_10	stable_HEK293_PAClight1	10	300	477.48
HEK293_PACight1_PACAP38_A10_A10_010.fcs	HEK293_PACight1_PACAP38_A10_A10_010.fcs	stable_HEK293_PAClight1_10	stable_HEK293_PAClight1	10	300	3342.36
HEK293_PACight1_PACAP38_A10_A10_010.fcs	HEK293_PACight1_PACAP38_A10_A10_010.fcs	stable_HEK293_PAClight1_10	stable_HEK293_PAClight1	10	300	3096.72
HEK293_PACight1_PACAP38_A10_A10_010.fcs	HEK293_PACight1_PACAP38_A10_A10_010.fcs	stable_HEK293_PAClight1_10	stable_HEK293_PAClight1	10	300	8391.78
HEK293_PACight1_PACAP38_A10_A10_010.fcs	HEK293_PACight1_PACAP38_A10_A10_010.fcs	stable_HEK293_PAClight1_10	stable_HEK293_PAClight1	10	300	6009.9
HEK293_PACight1_PACAP38_A10_A10_010.fcs	HEK293_PACight1_PACAP38_A10_A10_010.fcs	stable_HEK293_PAClight1_10	stable_HEK293_PAClight1	10	300	5892.6
HEK293_PACight1_PACAP38_A10_A10_010.fcs	HEK293_PACight1_PACAP38_A10_A10_010.fcs	stable_HEK293_PAClight1_10	stable_HEK293_PAClight1	10	300	5379.24
HEK293_PACight1_PACAP38_A10_A10_010.fcs	HEK293_PACight1_PACAP38_A10_A10_010.fcs	stable_HEK293_PAClight1_10	stable_HEK293_PAClight1	10	300	1230.96
HEK293_PACight1_PACAP38_A10_A10_010.fcs	HEK293_PACight1_PACAP38_A10_A10_010.fcs	stable_HEK293_PAClight1_10	stable_HEK293_PAClight1	10	300	4922.46
HEK293_PACight1_PACAP38_A10_A10_010.fcs	HEK293_PACight1_PACAP38_A10_A10_010.fcs	stable_HEK293_PAClight1_10	stable_HEK293_PAClight1	10	300	215.28
HEK293_PACight1_PACAP38_A10_A10_010.fcs	HEK293_PACight1_PACAP38_A10_A10_010.fcs	stable_HEK293_PAClight1_10	stable_HEK293_PAClight1	10	300	4584.36
HEK293_PACight1_PACAP38_A10_A10_010.fcs	HEK293_PACight1_PACAP38_A10_A10_010.fcs	stable_HEK293_PAClight1_10	stable_HEK293_PAClight1	10	300	3012.54
HEK293_PACight1_PACAP38_A10_A10_010.fcs	HEK293_PACight1_PACAP38_A10_A10_010.fcs	stable_HEK293_PAClight1_10	stable_HEK293_PAClight1	10	300	5782.2
HEK293_PACight1_PACAP38_A10_A10_010.fcs	HEK293_PACight1_PACAP38_A10_A10_010.fcs	stable_HEK293_PAClight1_10	stable_HEK293_PAClight1	10	300	4133.1
HEK293_PACight1_PACAP38_A10_A10_010.fcs	HEK293_PACight1_PACAP38_A10_A10_010.fcs	stable_HEK293_PAClight1_10	stable_HEK293_PAClight1	10	300	8979.66
HEK293_PACight1_PACAP38_A10_A10_010.fcs	HEK293_PACight1_PACAP38_A10_A10_010.fcs	stable_HEK293_PAClight1_10	stable_HEK293_PAClight1	10	300	7367.82
HEK293_PACight1_PACAP38_A10_A10_010.fcs	HEK293_PACight1_PACAP38_A10_A10_010.fcs	stable_HEK293_PAClight1_10	stable_HEK293_PAClight1	10	300	3058.08
HEK293_PACight1_PACAP38_A10_A10_010.fcs	HEK293_PACight1_PACAP38_A10_A10_010.fcs	stable_HEK293_PAClight1_10	stable_HEK293_PAClight1	10	300	2445.36
HEK293_PACight1_PACAP38_A10_A10_010.fcs	HEK293_PACight1_PACAP38_A10_A10_010.fcs	stable_HEK293_PAClight1_10	stable_HEK293_PAClight1	10	300	2408.1
HEK293_PACight1_PACAP38_A10_A10_010.fcs	HEK293_PACight1_PACAP38_A10_A10_010.fcs	stable_HEK293_PAClight1_10	stable_HEK293_PAClight1	10	300	3719.1
HEK293_PACight1_PACAP38_A10_A10_010.fcs	HEK293_PACight1_PACAP38_A10_A10_010.fcs	stable_HEK293_PAClight1_10	stable_HEK293_PAClight1	10	300	2206.62
HEK293_PACight1_PACAP38_A10_A10_010.fcs	HEK293_PACight1_PACAP38_A10_A10_010.fcs	stable_HEK293_PAClight1_10	stable_HEK293_PAClight1	10	300	718.98
HEK293_PACight1_PACAP38_A10_A10_010.fcs	HEK293_PACight1_PACAP38_A10_A10_010.fcs	stable_HEK293_PAClight1_10	stable_HEK293_PAClight1	10	300	2525.4
HEK293_PACight1_PACAP38_A10_A10_010.fcs	HEK293_PACight1_PACAP38_A10_A10_010.fcs	stable_HEK293_PAClight1_10	stable_HEK293_PAClight1	10	300	6310.74
HEK293_PACight1_PACAP38_A10_A10_010.fcs	HEK293_PACight1_PACAP38_A10_A10_010.fcs	stable_HEK293_PAClight1_10	stable_HEK293_PAClight1	10	300	-13.8
HEK293_PACight1_PACAP38_A10_A10_010.fcs	HEK293_PACight1_PACAP38_A10_A10_010.fcs	stable_HEK293_PAClight1_10	stable_HEK293_PAClight1	10	300	5707.68
HEK293_PACight1_PACAP38_A10_A10_010.fcs	HEK293_PACight1_PACAP38_A10_A10_010.fcs	stable_HEK293_PAClight1_10	stable_HEK293_PAClight1	10	300	2831.76
HEK293_PACight1_PACAP38_A10_A10_010.fcs	HEK293_PACight1_PACAP38_A10_A10_010.fcs	stable_HEK293_PAClight1_10	stable_HEK293_PAClight1	10	300	200.1
HEK293_PACight1_PACAP38_A10_A10_010.fcs	HEK293_PACight1_PACAP38_A10_A10_010.fcs	stable_HEK293_PAClight1_10	stable_HEK293_PAClight1	10	300	9571.68
HEK293_PACight1_PACAP38_A10_A10_010.fcs	HEK293_PACight1_PACAP38_A10_A10_010.fcs	stable_HEK293_PAClight1_10	stable_HEK293_PAClight1	10	300	10321
HEK293_PACight1_PACAP38_A10_A10_010.fcs	HEK293_PACight1_PACAP38_A10_A10_010.fcs	stable_HEK293_PAClight1_10	stable_HEK293_PAClight1	10	300	6121.68
HEK293_PACight1_PACAP38_A10_A10_010.fcs	HEK293_PACight1_PACAP38_A10_A10_010.fcs	stable_HEK293_PAClight1_10	stable_HEK293_PAClight1	10	300	4389.78
HEK293_PACight1_PACAP38_A10_A10_010.fcs	HEK293_PACight1_PACAP38_A10_A10_010.fcs	stable_HEK293_PAClight1_10	stable_HEK293_PAClight1	10	300	1962.36
HEK293_PACight1_PACAP38_A10_A10_010.fcs	HEK293_PACight1_PACAP38_A10_A10_010.fcs	stable_HEK293_PAClight1_10	stable_HEK293_PAClight1	10	300	7191.18
HEK293_PACight1_PACAP38_A10_A10_010.fcs	HEK293_PACight1_PACAP38_A10_A10_010.fcs	stable_HEK293_PAClight1_10	stable_HEK293_PAClight1	10	300	2931.12
HEK293_PACight1_PACAP38_A10_A10_010.fcs	HEK293_PACight1_PACAP38_A10_A10_010.fcs	stable_HEK293_PAClight1_10	stable_HEK293_PAClight1	10	300	3151.92
HEK293_PACight1_PACAP38_A10_A10_010.fcs	HEK293_PACight1_PACAP38_A10_A10_010.fcs	stable_HEK293_PAClight1_10	stable_HEK293_PAClight1	10	300	6640.56
HEK293_PACight1_PACAP38_A10_A10_010.fcs	HEK293_PACight1_PACAP38_A10_A10_010.fcs	stable_HEK293_PAClight1_10	stable_HEK293_PAClight1	10	300	5704.92
HEK293_PACight1_PACAP38_A10_A10_010.fcs	HEK293_PACight1_PACAP38_A10_A10_010.fcs	stable_HEK293_PAClight1_10	stable_HEK293_PAClight1	10	300	7017.3
HEK293_PACight1_PACAP38_A10_A10_010.fcs	HEK293_PACight1_PACAP38_A10_A10_010.fcs	stable_HEK293_PAClight1_10	stable_HEK293_PAClight1	10	300	5278.5
HEK293_PACight1_PACAP38_A10_A10_010.fcs	HEK293_PACight1_PACAP38_A10_A10_010.fcs	stable_HEK293_PAClight1_10	stable_HEK293_PAClight1	10	300	5855.34
HEK293_PACight1_PACAP38_A10_A10_010.fcs	HEK293_PACight1_PACAP38_A10_A10_010.fcs	stable_HEK293_PAClight1_10	stable_HEK293_PAClight1	10	300	8085.42
HEK293_PACight1_PACAP38_A10_A10_010.fcs	HEK293_PACight1_PACAP38_A10_A10_010.fcs	stable_HEK293_PAClight1_10	stable_HEK293_PAClight1	10	300	4244.88
HEK293_PACight1_PACAP38_A10_A10_010.fcs	HEK293_PACight1_PACAP38_A10_A10_010.fcs	stable_HEK293_PAClight1_10	stable_HEK293_PAClight1	10	300	10069.9
HEK293_PACight1_PACAP38_A10_A10_010.fcs	HEK293_PACight1_PACAP38_A10_A10_010.fcs	stable_HEK293_PAClight1_10	stable_HEK293_PAClight1	10	300	1029.48
HEK293_PACight1_PACAP38_A10_A10_010.fcs	HEK293_PACight1_PACAP38_A10_A10_010.fcs	stable_HEK293_PAClight1_10	stable_HEK293_PAClight1	10	300	3149.16
HEK293_PACight1_PACAP38_A10_A10_010.fcs	HEK293_PACight1_PACAP38_A10_A10_010.fcs	stable_HEK293_PAClight1_10	stable_HEK293_PAClight1	10	300	8032.98
HEK293_PACight1_PACAP38_A10_A10_010.fcs	HEK293_PACight1_PACAP38_A10_A10_010.fcs	stable_HEK293_PAClight1_10	stable_HEK293_PAClight1	10	300	5783.58
HEK293_PACight1_PACAP38_A10_A10_010.fcs	HEK293_PACight1_PACAP38_A10_A10_010.fcs	stable_HEK293_PAClight1_10	stable_HEK293_PAClight1	10	300	4249.02
HEK293_PACight1_PACAP38_A10_A10_010.fcs	HEK293_PACight1_PACAP38_A10_A10_010.fcs	stable_HEK293_PAClight1_10	stable_HEK293_PAClight1	10	300	4037.88
HEK293_PACight1_PACAP38_A10_A10_010.fcs	HEK293_PACight1_PACAP38_A10_A10_010.fcs	stable_HEK293_PAClight1_10	stable_HEK293_PAClight1	10	300	6080.28
HEK293_PACight1_PACAP38_A10_A10_010.fcs	HEK293_PACight1_PACAP38_A10_A10_010.fcs	stable_HEK293_PAClight1_10	stable_HEK293_PAClight1	10	300	4504.32
HEK293_PACight1_PACAP38_A10_A10_010.fcs	HEK293_PACight1_PACAP38_A10_A10_010.fcs	stable_HEK293_PAClight1_10	stable_HEK293_PAClight1	10	300	5946.42
HEK293_PACight1_PACAP38_A10_A10_010.fcs	HEK293_PACight1_PACAP38_A10_A10_010.fcs	stable_HEK293_PAClight1_10	stable_HEK293_PAClight1	10	300	6156.18
HEK293_PACight1_PACAP38_A10_A10_010.fcs	HEK293_PACight1_PACAP38_A10_A10_010.fcs	stable_HEK293_PAClight1_10	stable_HEK293_PAClight1	10	300	5427.54
HEK293_PACight1_PACAP38_A10_A10_010.fcs	HEK293_PACight1_PACAP38_A10_A10_010.fcs	stable_HEK293_PAClight1_10	stable_HEK293_PAClight1	10	300	2776.56
HEK293_PACight1_PACAP38_A10_A10_010.fcs	HEK293_PACight1_PACAP38_A10_A10_010.fcs	stable_HEK293_PAClight1_10	stable_HEK293_PAClight1	10	300	1744.32
HEK293_PACight1_PACAP38_A10_A10_010.fcs	HEK293_PACight1_PACAP38_A10_A10_010.fcs	stable_HEK293_PAClight1_10	stable_HEK293_PAClight1	10	300	1066.74
HEK293_PACight1_PACAP38_A10_A10_010.fcs	HEK293_PACight1_PACAP38_A10_A10_010.fcs	stable_HEK293_PAClight1_10	stable_HEK293_PAClight1	10	300	4120.68
HEK293_PACight1_PACAP38_A10_A10_010.fcs	HEK293_PACight1_PACAP38_A10_A10_010.fcs	stable_HEK293_PAClight1_10	stable_HEK293_PAClight1	10	300	3902.64
HEK293_PACight1_PACAP38_A10_A10_010.fcs	HEK293_PACight1_PACAP38_A10_A10_010.fcs	stable_HEK293_PAClight1_10	stable_HEK293_PAClight1	10	300	129.72
HEK293_PACight1_PACAP38_A10_A10_010.fcs	HEK293_PACight1_PACAP38_A10_A10_010.fcs	stable_HEK293_PAClight1_10	stable_HEK293_PAClight1	10	300	343.62
HEK293_PACight1_PACAP38_A10_A10_010.fcs	HEK293_PACight1_PACAP38_A10_A10_010.fcs	stable_HEK293_PAClight1_10	stable_HEK293_PAClight1	10	300	4816.2
HEK293_PACight1_PACAP38_A10_A10_010.fcs	HEK293_PACight1_PACAP38_A10_A10_010.fcs	stable_HEK293_PAClight1_10	stable_HEK293_PAClight1	10	300	4549.86
HEK293_PACight1_PACAP38_A10_A10_010.fcs	HEK293_PACight1_PACAP38_A10_A10_010.fcs	stable_HEK293_PAClight1_10	stable_HEK293_PAClight1	10	300	6099.6
HEK293_PACight1_PACAP38_A10_A10_010.fcs	HEK293_PACight1_PACAP38_A10_A10_010.fcs	stable_HEK293_PAClight1_10	stable_HEK293_PAClight1	10	300	3270.6
HEK293_PACight1_PACAP38_A10_A10_010.fcs	HEK293_PACight1_PACAP38_A10_A10_010.fcs	stable_HEK293_PAClight1_10	stable_HEK293_PAClight1	10	300	155.94
HEK293_PACight1_PACAP38_A10_A10_010.fcs	HEK293_PACight1_PACAP38_A10_A10_010.fcs	stable_HEK293_PAClight1_10	stable_HEK293_PAClight1	10	300	10616.3
HEK293_PACight1_PACAP38_A10_A10_010.fcs	HEK293_PACight1_PACAP38_A10_A10_010.fcs	stable_HEK293_PAClight1_10	stable_HEK293_PAClight1	10	300	2802.78
HEK293_PACight1_PACAP38_A10_A10_010.fcs	HEK293_PACight1_PACAP38_A10_A10_010.fcs	stable_HEK293_PAClight1_10	stable_HEK293_PAClight1	10	300	8706.42
HEK293_PACight1_PACAP38_A10_A10_010.fcs	HEK293_PACight1_PACAP38_A10_A10_010.fcs	stable_HEK293_PAClight1_10	stable_HEK293_PAClight1	10	300	3692.88
HEK293_PACight1_PACAP38_A10_A10_010.fcs	HEK293_PACight1_PACAP38_A10_A10_010.fcs	stable_HEK293_PAClight1_10	stable_HEK293_PAClight1	10	300	1689.12
HEK293_PACight1_PACAP38_A10_A10_010.fcs	HEK293_PACight1_PACAP38_A10_A10_010.fcs	stable_HEK293_PAClight1_10	stable_HEK293_PAClight1	10	300	1691.88
HEK293_PACight1_PACAP38_A10_A10_010.fcs	HEK293_PACight1_PACAP38_A10_A10_010.fcs	stable_HEK293_PAClight1_10	stable_HEK293_PAClight1	10	300	4555.38
HEK293_PACight1_PACAP38_A10_A10_010.fcs	HEK293_PACight1_PACAP38_A10_A10_010.fcs	stable_HEK293_PAClight1_10	stable_HEK293_PAClight1	10	300	5481.36
HEK293_PACight1_PACAP38_A10_A10_010.fcs	HEK293_PACight1_PACAP38_A10_A10_010.fcs	stable_HEK293_PAClight1_10	stable_HEK293_PAClight1	10	300	3175.38
HEK293_PACight1_PACAP38_A10_A10_010.fcs	HEK293_PACight1_PACAP38_A10_A10_010.fcs	stable_HEK293_PAClight1_10	stable_HEK293_PAClight1	10	300	3476.22
HEK293_PACight1_PACAP38_A10_A10_010.fcs	HEK293_PACight1_PACAP38_A10_A10_010.fcs	stable_HEK293_PAClight1_10	stable_HEK293_PAClight1	10	300	4657.5
HEK293_PACight1_PACAP38_A10_A10_010.fcs	HEK293_PACight1_PACAP38_A10_A10_010.fcs	stable_HEK293_PAClight1_10	stable_HEK293_PAClight1	10	300	4734.78
HEK293_PACight1_PACAP38_A10_A10_010.fcs	HEK293_PACight1_PACAP38_A10_A10_010.fcs	stable_HEK293_PAClight1_10	stable_HEK293_PAClight1	10	300	5675.94
HEK293_PACight1_PACAP38_A10_A10_010.fcs	HEK293_PACight1_PACAP38_A10_A10_010.fcs	stable_HEK293_PAClight1_10	stable_HEK293_PAClight1	10	300	7923.96
HEK293_PACight1_PACAP38_A10_A10_010.fcs	HEK293_PACight1_PACAP38_A10_A10_010.fcs	stable_HEK293_PAClight1_10	stable_HEK293_PAClight1	10	300	2639.94
HEK293_PACight1_PACAP38_A10_A10_010.fcs	HEK293_PACight1_PACAP38_A10_A10_010.fcs	stable_HEK293_PAClight1_10	stable_HEK293_PAClight1	10	300	4618.86
HEK293_PACight1_PACAP38_A10_A10_010.fcs	HEK293_PACight1_PACAP38_A10_A10_010.fcs	stable_HEK293_PAClight1_10	stable_HEK293_PAClight1	10	300	2183.16
HEK293_PACight1_PACAP38_A10_A10_010.fcs	HEK293_PACight1_PACAP38_A10_A10_010.fcs	stable_HEK293_PAClight1_10	stable_HEK293_PAClight1	10	300	4391.16
HEK293_PACight1_PACAP38_A10_A10_010.fcs	HEK293_PACight1_PACAP38_A10_A10_010.fcs	stable_HEK293_PAClight1_10	stable_HEK293_PAClight1	10	300	77.28
HEK293_PACight1_PACAP38_A10_A10_010.fcs	HEK293_PACight1_PACAP38_A10_A10_010.fcs	stable_HEK293_PAClight1_10	stable_HEK293_PAClight1	10	300	3438.96
HEK293_PACight1_PACAP38_A10_A10_010.fcs	HEK293_PACight1_PACAP38_A10_A10_010.fcs	stable_HEK293_PAClight1_10	stable_HEK293_PAClight1	10	300	6279
HEK293_PACight1_PACAP38_A10_A10_010.fcs	HEK293_PACight1_PACAP38_A10_A10_010.fcs	stable_HEK293_PAClight1_10	stable_HEK293_PAClight1	10	300	2300.46
HEK293_PACight1_PACAP38_A10_A10_010.fcs	HEK293_PACight1_PACAP38_A10_A10_010.fcs	stable_HEK293_PAClight1_10	stable_HEK293_PAClight1	10	300	4756.86
HEK293_PACight1_PACAP38_A10_A10_010.fcs	HEK293_PACight1_PACAP38_A10_A10_010.fcs	stable_HEK293_PAClight1_10	stable_HEK293_PAClight1	10	300	178.02
HEK293_PACight1_PACAP38_A10_A10_010.fcs	HEK293_PACight1_PACAP38_A10_A10_010.fcs	stable_HEK293_PAClight1_10	stable_HEK293_PAClight1	10	300	4968
HEK293_PACight1_PACAP38_A10_A10_010.fcs	HEK293_PACight1_PACAP38_A10_A10_010.fcs	stable_HEK293_PAClight1_10	stable_HEK293_PAClight1	10	300	6185.16
HEK293_PACight1_PACAP38_A10_A10_010.fcs	HEK293_PACight1_PACAP38_A10_A10_010.fcs	stable_HEK293_PAClight1_10	stable_HEK293_PAClight1	10	300	3277.5
HEK293_PACight1_PACAP38_A10_A10_010.fcs	HEK293_PACight1_PACAP38_A10_A10_010.fcs	stable_HEK293_PAClight1_10	stable_HEK293_PAClight1	10	300	6319.02
HEK293_PACight1_PACAP38_A10_A10_010.fcs	HEK293_PACight1_PACAP38_A10_A10_010.fcs	stable_HEK293_PAClight1_10	stable_HEK293_PAClight1	10	300	169.74
HEK293_PACight1_PACAP38_A10_A10_010.fcs	HEK293_PACight1_PACAP38_A10_A10_010.fcs	stable_HEK293_PAClight1_10	stable_HEK293_PAClight1	10	300	5332.32
HEK293_PACight1_PACAP38_A10_A10_010.fcs	HEK293_PACight1_PACAP38_A10_A10_010.fcs	stable_HEK293_PAClight1_10	stable_HEK293_PAClight1	10	300	6153.42
HEK293_PACight1_PACAP38_A10_A10_010.fcs	HEK293_PACight1_PACAP38_A10_A10_010.fcs	stable_HEK293_PAClight1_10	stable_HEK293_PAClight1	10	300	9811.8
HEK293_PACight1_PACAP38_A10_A10_010.fcs	HEK293_PACight1_PACAP38_A10_A10_010.fcs	stable_HEK293_PAClight1_10	stable_HEK293_PAClight1	10	300	4496.04
HEK293_PACight1_PACAP38_A10_A10_010.fcs	HEK293_PACight1_PACAP38_A10_A10_010.fcs	stable_HEK293_PAClight1_10	stable_HEK293_PAClight1	10	300	2641.32
HEK293_PACight1_PACAP38_A10_A10_010.fcs	HEK293_PACight1_PACAP38_A10_A10_010.fcs	stable_HEK293_PAClight1_10	stable_HEK293_PAClight1	10	300	6713.7
HEK293_PACight1_PACAP38_A10_A10_010.fcs	HEK293_PACight1_PACAP38_A10_A10_010.fcs	stable_HEK293_PAClight1_10	stable_HEK293_PAClight1	10	300	12054.3
HEK293_PACight1_PACAP38_A10_A10_010.fcs	HEK293_PACight1_PACAP38_A10_A10_010.fcs	stable_HEK293_PAClight1_10	stable_HEK293_PAClight1	10	300	3416.88
HEK293_PACight1_PACAP38_A10_A10_010.fcs	HEK293_PACight1_PACAP38_A10_A10_010.fcs	stable_HEK293_PAClight1_10	stable_HEK293_PAClight1	10	300	899.76
HEK293_PACight1_PACAP38_A10_A10_010.fcs	HEK293_PACight1_PACAP38_A10_A10_010.fcs	stable_HEK293_PAClight1_10	stable_HEK293_PAClight1	10	300	4014.42
HEK293_PACight1_PACAP38_A10_A10_010.fcs	HEK293_PACight1_PACAP38_A10_A10_010.fcs	stable_HEK293_PAClight1_10	stable_HEK293_PAClight1	10	300	3503.82
HEK293_PACight1_PACAP38_A10_A10_010.fcs	HEK293_PACight1_PACAP38_A10_A10_010.fcs	stable_HEK293_PAClight1_10	stable_HEK293_PAClight1	10	300	2943.54
HEK293_PACight1_PACAP38_A10_A10_010.fcs	HEK293_PACight1_PACAP38_A10_A10_010.fcs	stable_HEK293_PAClight1_10	stable_HEK293_PAClight1	10	300	1458.66
HEK293_PACight1_PACAP38_A10_A10_010.fcs	HEK293_PACight1_PACAP38_A10_A10_010.fcs	stable_HEK293_PAClight1_10	stable_HEK293_PAClight1	10	300	3305.1
HEK293_PACight1_PACAP38_A10_A10_010.fcs	HEK293_PACight1_PACAP38_A10_A10_010.fcs	stable_HEK293_PAClight1_10	stable_HEK293_PAClight1	10	300	4174.5
HEK293_PACight1_PACAP38_A10_A10_010.fcs	HEK293_PACight1_PACAP38_A10_A10_010.fcs	stable_HEK293_PAClight1_10	stable_HEK293_PAClight1	10	300	23206.1
HEK293_PACight1_PACAP38_A10_A10_010.fcs	HEK293_PACight1_PACAP38_A10_A10_010.fcs	stable_HEK293_PAClight1_10	stable_HEK293_PAClight1	10	300	5608.32
HEK293_PACight1_PACAP38_A10_A10_010.fcs	HEK293_PACight1_PACAP38_A10_A10_010.fcs	stable_HEK293_PAClight1_10	stable_HEK293_PAClight1	10	300	3454.14
HEK293_PACight1_PACAP38_A10_A10_010.fcs	HEK293_PACight1_PACAP38_A10_A10_010.fcs	stable_HEK293_PAClight1_10	stable_HEK293_PAClight1	10	300	4722.36
HEK293_PACight1_PACAP38_A10_A10_010.fcs	HEK293_PACight1_PACAP38_A10_A10_010.fcs	stable_HEK293_PAClight1_10	stable_HEK293_PAClight1	10	300	19820.9
HEK293_PACight1_PACAP38_A10_A10_010.fcs	HEK293_PACight1_PACAP38_A10_A10_010.fcs	stable_HEK293_PAClight1_10	stable_HEK293_PAClight1	10	300	25298.2
HEK293_PACight1_PACAP38_A10_A10_010.fcs	HEK293_PACight1_PACAP38_A10_A10_010.fcs	stable_HEK293_PAClight1_10	stable_HEK293_PAClight1	10	300	3274.74
HEK293_PACight1_PACAP38_A10_A10_010.fcs	HEK293_PACight1_PACAP38_A10_A10_010.fcs	stable_HEK293_PAClight1_10	stable_HEK293_PAClight1	10	300	4242.12
HEK293_PACight1_PACAP38_A10_A10_010.fcs	HEK293_PACight1_PACAP38_A10_A10_010.fcs	stable_HEK293_PAClight1_10	stable_HEK293_PAClight1	10	300	6619.86
HEK293_PACight1_PACAP38_A10_A10_010.fcs	HEK293_PACight1_PACAP38_A10_A10_010.fcs	stable_HEK293_PAClight1_10	stable_HEK293_PAClight1	10	300	2519.88
HEK293_PACight1_PACAP38_A10_A10_010.fcs	HEK293_PACight1_PACAP38_A10_A10_010.fcs	stable_HEK293_PAClight1_10	stable_HEK293_PAClight1	10	300	7307.1
HEK293_PACight1_PACAP38_A10_A10_010.fcs	HEK293_PACight1_PACAP38_A10_A10_010.fcs	stable_HEK293_PAClight1_10	stable_HEK293_PAClight1	10	300	1991.34
HEK293_PACight1_PACAP38_A10_A10_010.fcs	HEK293_PACight1_PACAP38_A10_A10_010.fcs	stable_HEK293_PAClight1_10	stable_HEK293_PAClight1	10	300	4449.12
HEK293_PACight1_PACAP38_A10_A10_010.fcs	HEK293_PACight1_PACAP38_A10_A10_010.fcs	stable_HEK293_PAClight1_10	stable_HEK293_PAClight1	10	300	2604.06
HEK293_PACight1_PACAP38_A10_A10_010.fcs	HEK293_PACight1_PACAP38_A10_A10_010.fcs	stable_HEK293_PAClight1_10	stable_HEK293_PAClight1	10	300	5014.92
HEK293_PACight1_PACAP38_A10_A10_010.fcs	HEK293_PACight1_PACAP38_A10_A10_010.fcs	stable_HEK293_PAClight1_10	stable_HEK293_PAClight1	10	300	3877.8
HEK293_PACight1_PACAP38_A10_A10_010.fcs	HEK293_PACight1_PACAP38_A10_A10_010.fcs	stable_HEK293_PAClight1_10	stable_HEK293_PAClight1	10	300	6778.56
HEK293_PACight1_PACAP38_A10_A10_010.fcs	HEK293_PACight1_PACAP38_A10_A10_010.fcs	stable_HEK293_PAClight1_10	stable_HEK293_PAClight1	10	300	2519.88
HEK293_PACight1_PACAP38_A10_A10_010.fcs	HEK293_PACight1_PACAP38_A10_A10_010.fcs	stable_HEK293_PAClight1_10	stable_HEK293_PAClight1	10	300	6880.68
HEK293_PACight1_PACAP38_A10_A10_010.fcs	HEK293_PACight1_PACAP38_A10_A10_010.fcs	stable_HEK293_PAClight1_10	stable_HEK293_PAClight1	10	300	4780.32
HEK293_PACight1_PACAP38_A10_A10_010.fcs	HEK293_PACight1_PACAP38_A10_A10_010.fcs	stable_HEK293_PAClight1_10	stable_HEK293_PAClight1	10	300	2420.52
HEK293_PACight1_PACAP38_A10_A10_010.fcs	HEK293_PACight1_PACAP38_A10_A10_010.fcs	stable_HEK293_PAClight1_10	stable_HEK293_PAClight1	10	300	5241.24
HEK293_PACight1_PACAP38_A10_A10_010.fcs	HEK293_PACight1_PACAP38_A10_A10_010.fcs	stable_HEK293_PAClight1_10	stable_HEK293_PAClight1	10	300	4629.9
HEK293_PACight1_PACAP38_A10_A10_010.fcs	HEK293_PACight1_PACAP38_A10_A10_010.fcs	stable_HEK293_PAClight1_10	stable_HEK293_PAClight1	10	300	3950.94
HEK293_PACight1_PACAP38_A10_A10_010.fcs	HEK293_PACight1_PACAP38_A10_A10_010.fcs	stable_HEK293_PAClight1_10	stable_HEK293_PAClight1	10	300	423.66
HEK293_PACight1_PACAP38_A10_A10_010.fcs	HEK293_PACight1_PACAP38_A10_A10_010.fcs	stable_HEK293_PAClight1_10	stable_HEK293_PAClight1	10	300	4369.08
HEK293_PACight1_PACAP38_A10_A10_010.fcs	HEK293_PACight1_PACAP38_A10_A10_010.fcs	stable_HEK293_PAClight1_10	stable_HEK293_PAClight1	10	300	242.88
HEK293_PACight1_PACAP38_A10_A10_010.fcs	HEK293_PACight1_PACAP38_A10_A10_010.fcs	stable_HEK293_PAClight1_10	stable_HEK293_PAClight1	10	300	6661.26
HEK293_PACight1_PACAP38_A10_A10_010.fcs	HEK293_PACight1_PACAP38_A10_A10_010.fcs	stable_HEK293_PAClight1_10	stable_HEK293_PAClight1	10	300	2410.86
HEK293_PACight1_PACAP38_A10_A10_010.fcs	HEK293_PACight1_PACAP38_A10_A10_010.fcs	stable_HEK293_PAClight1_10	stable_HEK293_PAClight1	10	300	3952.32
HEK293_PACight1_PACAP38_A10_A10_010.fcs	HEK293_PACight1_PACAP38_A10_A10_010.fcs	stable_HEK293_PAClight1_10	stable_HEK293_PAClight1	10	300	663.78
HEK293_PACight1_PACAP38_A10_A10_010.fcs	HEK293_PACight1_PACAP38_A10_A10_010.fcs	stable_HEK293_PAClight1_10	stable_HEK293_PAClight1	10	300	4527.78
HEK293_PACight1_PACAP38_A10_A10_010.fcs	HEK293_PACight1_PACAP38_A10_A10_010.fcs	stable_HEK293_PAClight1_10	stable_HEK293_PAClight1	10	300	2078.28
HEK293_PACight1_PACAP38_A10_A10_010.fcs	HEK293_PACight1_PACAP38_A10_A10_010.fcs	stable_HEK293_PAClight1_10	stable_HEK293_PAClight1	10	300	3374.1
HEK293_PACight1_PACAP38_A10_A10_010.fcs	HEK293_PACight1_PACAP38_A10_A10_010.fcs	stable_HEK293_PAClight1_10	stable_HEK293_PAClight1	10	300	14298.2
HEK293_PACight1_PACAP38_A10_A10_010.fcs	HEK293_PACight1_PACAP38_A10_A10_010.fcs	stable_HEK293_PAClight1_10	stable_HEK293_PAClight1	10	300	7588.62
HEK293_PACight1_PACAP38_A10_A10_010.fcs	HEK293_PACight1_PACAP38_A10_A10_010.fcs	stable_HEK293_PAClight1_10	stable_HEK293_PAClight1	10	300	4483.62
HEK293_PACight1_PACAP38_A10_A10_010.fcs	HEK293_PACight1_PACAP38_A10_A10_010.fcs	stable_HEK293_PAClight1_10	stable_HEK293_PAClight1	10	300	3358.92
HEK293_PACight1_PACAP38_A10_A10_010.fcs	HEK293_PACight1_PACAP38_A10_A10_010.fcs	stable_HEK293_PAClight1_10	stable_HEK293_PAClight1	10	300	3011.16
HEK293_PACight1_PACAP38_A10_A10_010.fcs	HEK293_PACight1_PACAP38_A10_A10_010.fcs	stable_HEK293_PAClight1_10	stable_HEK293_PAClight1	10	300	10127.8
HEK293_PACight1_PACAP38_A10_A10_010.fcs	HEK293_PACight1_PACAP38_A10_A10_010.fcs	stable_HEK293_PAClight1_10	stable_HEK293_PAClight1	10	300	6371.46
HEK293_PACight1_PACAP38_A10_A10_010.fcs	HEK293_PACight1_PACAP38_A10_A10_010.fcs	stable_HEK293_PAClight1_10	stable_HEK293_PAClight1	10	300	3777.06
HEK293_PACight1_PACAP38_A10_A10_010.fcs	HEK293_PACight1_PACAP38_A10_A10_010.fcs	stable_HEK293_PAClight1_10	stable_HEK293_PAClight1	10	300	3676.32
HEK293_PACight1_PACAP38_A10_A10_010.fcs	HEK293_PACight1_PACAP38_A10_A10_010.fcs	stable_HEK293_PAClight1_10	stable_HEK293_PAClight1	10	300	356.04
HEK293_PACight1_PACAP38_A10_A10_010.fcs	HEK293_PACight1_PACAP38_A10_A10_010.fcs	stable_HEK293_PAClight1_10	stable_HEK293_PAClight1	10	300	4163.46
HEK293_PACight1_PACAP38_A10_A10_010.fcs	HEK293_PACight1_PACAP38_A10_A10_010.fcs	stable_HEK293_PAClight1_10	stable_HEK293_PAClight1	10	300	3488.64
HEK293_PACight1_PACAP38_A10_A10_010.fcs	HEK293_PACight1_PACAP38_A10_A10_010.fcs	stable_HEK293_PAClight1_10	stable_HEK293_PAClight1	10	300	5444.1
HEK293_PACight1_PACAP38_A10_A10_010.fcs	HEK293_PACight1_PACAP38_A10_A10_010.fcs	stable_HEK293_PAClight1_10	stable_HEK293_PAClight1	10	300	868.02
HEK293_PACight1_PACAP38_A10_A10_010.fcs	HEK293_PACight1_PACAP38_A10_A10_010.fcs	stable_HEK293_PAClight1_10	stable_HEK293_PAClight1	10	300	2468.82
HEK293_PACight1_PACAP38_A10_A10_010.fcs	HEK293_PACight1_PACAP38_A10_A10_010.fcs	stable_HEK293_PAClight1_10	stable_HEK293_PAClight1	10	300	418.14
HEK293_PACight1_PACAP38_A10_A10_010.fcs	HEK293_PACight1_PACAP38_A10_A10_010.fcs	stable_HEK293_PAClight1_10	stable_HEK293_PAClight1	10	300	2719.98
HEK293_PACight1_PACAP38_A10_A10_010.fcs	HEK293_PACight1_PACAP38_A10_A10_010.fcs	stable_HEK293_PAClight1_10	stable_HEK293_PAClight1	10	300	5444.1
HEK293_PACight1_PACAP38_A10_A10_010.fcs	HEK293_PACight1_PACAP38_A10_A10_010.fcs	stable_HEK293_PAClight1_10	stable_HEK293_PAClight1	10	300	154.56
HEK293_PACight1_PACAP38_A10_A10_010.fcs	HEK293_PACight1_PACAP38_A10_A10_010.fcs	stable_HEK293_PAClight1_10	stable_HEK293_PAClight1	10	300	5333.7
HEK293_PACight1_PACAP38_A10_A10_010.fcs	HEK293_PACight1_PACAP38_A10_A10_010.fcs	stable_HEK293_PAClight1_10	stable_HEK293_PAClight1	10	300	5311.62
HEK293_PACight1_PACAP38_A10_A10_010.fcs	HEK293_PACight1_PACAP38_A10_A10_010.fcs	stable_HEK293_PAClight1_10	stable_HEK293_PAClight1	10	300	4282.14
HEK293_PACight1_PACAP38_A10_A10_010.fcs	HEK293_PACight1_PACAP38_A10_A10_010.fcs	stable_HEK293_PAClight1_10	stable_HEK293_PAClight1	10	300	12726.4
HEK293_PACight1_PACAP38_A10_A10_010.fcs	HEK293_PACight1_PACAP38_A10_A10_010.fcs	stable_HEK293_PAClight1_10	stable_HEK293_PAClight1	10	300	13898
HEK293_PACight1_PACAP38_A10_A10_010.fcs	HEK293_PACight1_PACAP38_A10_A10_010.fcs	stable_HEK293_PAClight1_10	stable_HEK293_PAClight1	10	300	5408.22
HEK293_PACight1_PACAP38_A10_A10_010.fcs	HEK293_PACight1_PACAP38_A10_A10_010.fcs	stable_HEK293_PAClight1_10	stable_HEK293_PAClight1	10	300	4146.9
HEK293_PACight1_PACAP38_A10_A10_010.fcs	HEK293_PACight1_PACAP38_A10_A10_010.fcs	stable_HEK293_PAClight1_10	stable_HEK293_PAClight1	10	300	4402.2
HEK293_PACight1_PACAP38_A10_A10_010.fcs	HEK293_PACight1_PACAP38_A10_A10_010.fcs	stable_HEK293_PAClight1_10	stable_HEK293_PAClight1	10	300	4231.08
HEK293_PACight1_PACAP38_A10_A10_010.fcs	HEK293_PACight1_PACAP38_A10_A10_010.fcs	stable_HEK293_PAClight1_10	stable_HEK293_PAClight1	10	300	5515.86
HEK293_PACight1_PACAP38_A10_A10_010.fcs	HEK293_PACight1_PACAP38_A10_A10_010.fcs	stable_HEK293_PAClight1_10	stable_HEK293_PAClight1	10	300	5278.5
HEK293_PACight1_PACAP38_A10_A10_010.fcs	HEK293_PACight1_PACAP38_A10_A10_010.fcs	stable_HEK293_PAClight1_10	stable_HEK293_PAClight1	10	300	2784.84
HEK293_PACight1_PACAP38_A10_A10_010.fcs	HEK293_PACight1_PACAP38_A10_A10_010.fcs	stable_HEK293_PAClight1_10	stable_HEK293_PAClight1	10	300	4650.6
HEK293_PACight1_PACAP38_A10_A10_010.fcs	HEK293_PACight1_PACAP38_A10_A10_010.fcs	stable_HEK293_PAClight1_10	stable_HEK293_PAClight1	10	300	3156.06
HEK293_PACight1_PACAP38_A10_A10_010.fcs	HEK293_PACight1_PACAP38_A10_A10_010.fcs	stable_HEK293_PAClight1_10	stable_HEK293_PAClight1	10	300	7549.98
HEK293_PACight1_PACAP38_A10_A10_010.fcs	HEK293_PACight1_PACAP38_A10_A10_010.fcs	stable_HEK293_PAClight1_10	stable_HEK293_PAClight1	10	300	4563.66
HEK293_PACight1_PACAP38_A10_A10_010.fcs	HEK293_PACight1_PACAP38_A10_A10_010.fcs	stable_HEK293_PAClight1_10	stable_HEK293_PAClight1	10	300	3378.24
HEK293_PACight1_PACAP38_A10_A10_010.fcs	HEK293_PACight1_PACAP38_A10_A10_010.fcs	stable_HEK293_PAClight1_10	stable_HEK293_PAClight1	10	300	3743.94
HEK293_PACight1_PACAP38_A10_A10_010.fcs	HEK293_PACight1_PACAP38_A10_A10_010.fcs	stable_HEK293_PAClight1_10	stable_HEK293_PAClight1	10	300	2283.9
HEK293_PACight1_PACAP38_A10_A10_010.fcs	HEK293_PACight1_PACAP38_A10_A10_010.fcs	stable_HEK293_PAClight1_10	stable_HEK293_PAClight1	10	300	5663.52
HEK293_PACight1_PACAP38_A10_A10_010.fcs	HEK293_PACight1_PACAP38_A10_A10_010.fcs	stable_HEK293_PAClight1_10	stable_HEK293_PAClight1	10	300	8339.34
HEK293_PACight1_PACAP38_A10_A10_010.fcs	HEK293_PACight1_PACAP38_A10_A10_010.fcs	stable_HEK293_PAClight1_10	stable_HEK293_PAClight1	10	300	82.8
HEK293_PACight1_PACAP38_A10_A10_010.fcs	HEK293_PACight1_PACAP38_A10_A10_010.fcs	stable_HEK293_PAClight1_10	stable_HEK293_PAClight1	10	300	2744.82
HEK293_PACight1_PACAP38_A10_A10_010.fcs	HEK293_PACight1_PACAP38_A10_A10_010.fcs	stable_HEK293_PAClight1_10	stable_HEK293_PAClight1	10	300	6942.78
HEK293_PACight1_PACAP38_A10_A10_010.fcs	HEK293_PACight1_PACAP38_A10_A10_010.fcs	stable_HEK293_PAClight1_10	stable_HEK293_PAClight1	10	300	8008.14
HEK293_PACight1_PACAP38_A10_A10_010.fcs	HEK293_PACight1_PACAP38_A10_A10_010.fcs	stable_HEK293_PAClight1_10	stable_HEK293_PAClight1	10	300	2241.12
HEK293_PACight1_PACAP38_A10_A10_010.fcs	HEK293_PACight1_PACAP38_A10_A10_010.fcs	stable_HEK293_PAClight1_10	stable_HEK293_PAClight1	10	300	9846.3
HEK293_PACight1_PACAP38_A10_A10_010.fcs	HEK293_PACight1_PACAP38_A10_A10_010.fcs	stable_HEK293_PAClight1_10	stable_HEK293_PAClight1	10	300	4574.7
HEK293_PACight1_PACAP38_A10_A10_010.fcs	HEK293_PACight1_PACAP38_A10_A10_010.fcs	stable_HEK293_PAClight1_10	stable_HEK293_PAClight1	10	300	5061.84
HEK293_PACight1_PACAP38_A10_A10_010.fcs	HEK293_PACight1_PACAP38_A10_A10_010.fcs	stable_HEK293_PAClight1_10	stable_HEK293_PAClight1	10	300	5591.76
HEK293_PACight1_PACAP38_A10_A10_010.fcs	HEK293_PACight1_PACAP38_A10_A10_010.fcs	stable_HEK293_PAClight1_10	stable_HEK293_PAClight1	10	300	2873.16
HEK293_PACight1_PACAP38_A10_A10_010.fcs	HEK293_PACight1_PACAP38_A10_A10_010.fcs	stable_HEK293_PAClight1_10	stable_HEK293_PAClight1	10	300	4340.1
HEK293_PACight1_PACAP38_A10_A10_010.fcs	HEK293_PACight1_PACAP38_A10_A10_010.fcs	stable_HEK293_PAClight1_10	stable_HEK293_PAClight1	10	300	4358.04
HEK293_PACight1_PACAP38_A10_A10_010.fcs	HEK293_PACight1_PACAP38_A10_A10_010.fcs	stable_HEK293_PAClight1_10	stable_HEK293_PAClight1	10	300	4209
HEK293_PACight1_PACAP38_A10_A10_010.fcs	HEK293_PACight1_PACAP38_A10_A10_010.fcs	stable_HEK293_PAClight1_10	stable_HEK293_PAClight1	10	300	4402.2
HEK293_PACight1_PACAP38_A10_A10_010.fcs	HEK293_PACight1_PACAP38_A10_A10_010.fcs	stable_HEK293_PAClight1_10	stable_HEK293_PAClight1	10	300	5768.4
HEK293_PACight1_PACAP38_A10_A10_010.fcs	HEK293_PACight1_PACAP38_A10_A10_010.fcs	stable_HEK293_PAClight1_10	stable_HEK293_PAClight1	10	300	4188.3
HEK293_PACight1_PACAP38_A10_A10_010.fcs	HEK293_PACight1_PACAP38_A10_A10_010.fcs	stable_HEK293_PAClight1_10	stable_HEK293_PAClight1	10	300	6354.9
HEK293_PACight1_PACAP38_A10_A10_010.fcs	HEK293_PACight1_PACAP38_A10_A10_010.fcs	stable_HEK293_PAClight1_10	stable_HEK293_PAClight1	10	300	5477.22
HEK293_PACight1_PACAP38_A10_A10_010.fcs	HEK293_PACight1_PACAP38_A10_A10_010.fcs	stable_HEK293_PAClight1_10	stable_HEK293_PAClight1	10	300	5922.96
HEK293_PACight1_PACAP38_A10_A10_010.fcs	HEK293_PACight1_PACAP38_A10_A10_010.fcs	stable_HEK293_PAClight1_10	stable_HEK293_PAClight1	10	300	7683.84
HEK293_PACight1_PACAP38_A10_A10_010.fcs	HEK293_PACight1_PACAP38_A10_A10_010.fcs	stable_HEK293_PAClight1_10	stable_HEK293_PAClight1	10	300	12480.7
HEK293_PACight1_PACAP38_A10_A10_010.fcs	HEK293_PACight1_PACAP38_A10_A10_010.fcs	stable_HEK293_PAClight1_10	stable_HEK293_PAClight1	10	300	13826.2
HEK293_PACight1_PACAP38_A10_A10_010.fcs	HEK293_PACight1_PACAP38_A10_A10_010.fcs	stable_HEK293_PAClight1_10	stable_HEK293_PAClight1	10	300	7947.42
HEK293_PACight1_PACAP38_A10_A10_010.fcs	HEK293_PACight1_PACAP38_A10_A10_010.fcs	stable_HEK293_PAClight1_10	stable_HEK293_PAClight1	10	300	4320.78
HEK293_PACight1_PACAP38_A10_A10_010.fcs	HEK293_PACight1_PACAP38_A10_A10_010.fcs	stable_HEK293_PAClight1_10	stable_HEK293_PAClight1	10	300	4265.58
HEK293_PACight1_PACAP38_A10_A10_010.fcs	HEK293_PACight1_PACAP38_A10_A10_010.fcs	stable_HEK293_PAClight1_10	stable_HEK293_PAClight1	10	300	11738.3
HEK293_PACight1_PACAP38_A10_A10_010.fcs	HEK293_PACight1_PACAP38_A10_A10_010.fcs	stable_HEK293_PAClight1_10	stable_HEK293_PAClight1	10	300	263.58
HEK293_PACight1_PACAP38_A10_A10_010.fcs	HEK293_PACight1_PACAP38_A10_A10_010.fcs	stable_HEK293_PAClight1_10	stable_HEK293_PAClight1	10	300	8154.42
HEK293_PACight1_PACAP38_A10_A10_010.fcs	HEK293_PACight1_PACAP38_A10_A10_010.fcs	stable_HEK293_PAClight1_10	stable_HEK293_PAClight1	10	300	4211.76
HEK293_PACight1_PACAP38_A10_A10_010.fcs	HEK293_PACight1_PACAP38_A10_A10_010.fcs	stable_HEK293_PAClight1_10	stable_HEK293_PAClight1	10	300	3393.42
HEK293_PACight1_PACAP38_A10_A10_010.fcs	HEK293_PACight1_PACAP38_A10_A10_010.fcs	stable_HEK293_PAClight1_10	stable_HEK293_PAClight1	10	300	8947.92
HEK293_PACight1_PACAP38_A10_A10_010.fcs	HEK293_PACight1_PACAP38_A10_A10_010.fcs	stable_HEK293_PAClight1_10	stable_HEK293_PAClight1	10	300	6252.78
HEK293_PACight1_PACAP38_A10_A10_010.fcs	HEK293_PACight1_PACAP38_A10_A10_010.fcs	stable_HEK293_PAClight1_10	stable_HEK293_PAClight1	10	300	7686.6
HEK293_PACight1_PACAP38_A10_A10_010.fcs	HEK293_PACight1_PACAP38_A10_A10_010.fcs	stable_HEK293_PAClight1_10	stable_HEK293_PAClight1	10	300	3423.78
HEK293_PACight1_PACAP38_A10_A10_010.fcs	HEK293_PACight1_PACAP38_A10_A10_010.fcs	stable_HEK293_PAClight1_10	stable_HEK293_PAClight1	10	300	4087.56
HEK293_PACight1_PACAP38_A10_A10_010.fcs	HEK293_PACight1_PACAP38_A10_A10_010.fcs	stable_HEK293_PAClight1_10	stable_HEK293_PAClight1	10	300	8113.02
HEK293_PACight1_PACAP38_A10_A10_010.fcs	HEK293_PACight1_PACAP38_A10_A10_010.fcs	stable_HEK293_PAClight1_10	stable_HEK293_PAClight1	10	300	7358.16
HEK293_PACight1_PACAP38_A10_A10_010.fcs	HEK293_PACight1_PACAP38_A10_A10_010.fcs	stable_HEK293_PAClight1_10	stable_HEK293_PAClight1	10	300	2419.14
HEK293_PACight1_PACAP38_A10_A10_010.fcs	HEK293_PACight1_PACAP38_A10_A10_010.fcs	stable_HEK293_PAClight1_10	stable_HEK293_PAClight1	10	300	3902.64
HEK293_PACight1_PACAP38_A10_A10_010.fcs	HEK293_PACight1_PACAP38_A10_A10_010.fcs	stable_HEK293_PAClight1_10	stable_HEK293_PAClight1	10	300	3732.9
HEK293_PACight1_PACAP38_A10_A10_010.fcs	HEK293_PACight1_PACAP38_A10_A10_010.fcs	stable_HEK293_PAClight1_10	stable_HEK293_PAClight1	10	300	1555.26
HEK293_PACight1_PACAP38_A10_A10_010.fcs	HEK293_PACight1_PACAP38_A10_A10_010.fcs	stable_HEK293_PAClight1_10	stable_HEK293_PAClight1	10	300	7917.06
HEK293_PACight1_PACAP38_A10_A10_010.fcs	HEK293_PACight1_PACAP38_A10_A10_010.fcs	stable_HEK293_PAClight1_10	stable_HEK293_PAClight1	10	300	3142.26
HEK293_PACight1_PACAP38_A10_A10_010.fcs	HEK293_PACight1_PACAP38_A10_A10_010.fcs	stable_HEK293_PAClight1_10	stable_HEK293_PAClight1	10	300	3244.38
HEK293_PACight1_PACAP38_A10_A10_010.fcs	HEK293_PACight1_PACAP38_A10_A10_010.fcs	stable_HEK293_PAClight1_10	stable_HEK293_PAClight1	10	300	5811.18
HEK293_PACight1_PACAP38_A10_A10_010.fcs	HEK293_PACight1_PACAP38_A10_A10_010.fcs	stable_HEK293_PAClight1_10	stable_HEK293_PAClight1	10	300	5824.98
HEK293_PACight1_PACAP38_A10_A10_010.fcs	HEK293_PACight1_PACAP38_A10_A10_010.fcs	stable_HEK293_PAClight1_10	stable_HEK293_PAClight1	10	300	5104.62
HEK293_PACight1_PACAP38_A10_A10_010.fcs	HEK293_PACight1_PACAP38_A10_A10_010.fcs	stable_HEK293_PAClight1_10	stable_HEK293_PAClight1	10	300	1417.26
HEK293_PACight1_PACAP38_A10_A10_010.fcs	HEK293_PACight1_PACAP38_A10_A10_010.fcs	stable_HEK293_PAClight1_10	stable_HEK293_PAClight1	10	300	282.9
HEK293_PACight1_PACAP38_A10_A10_010.fcs	HEK293_PACight1_PACAP38_A10_A10_010.fcs	stable_HEK293_PAClight1_10	stable_HEK293_PAClight1	10	300	97.98
HEK293_PACight1_PACAP38_A10_A10_010.fcs	HEK293_PACight1_PACAP38_A10_A10_010.fcs	stable_HEK293_PAClight1_10	stable_HEK293_PAClight1	10	300	3389.28
HEK293_PACight1_PACAP38_A10_A10_010.fcs	HEK293_PACight1_PACAP38_A10_A10_010.fcs	stable_HEK293_PAClight1_10	stable_HEK293_PAClight1	10	300	6463.92
HEK293_PACight1_PACAP38_A10_A10_010.fcs	HEK293_PACight1_PACAP38_A10_A10_010.fcs	stable_HEK293_PAClight1_10	stable_HEK293_PAClight1	10	300	5037
HEK293_PACight1_PACAP38_A10_A10_010.fcs	HEK293_PACight1_PACAP38_A10_A10_010.fcs	stable_HEK293_PAClight1_10	stable_HEK293_PAClight1	10	300	4846.56
HEK293_PACight1_PACAP38_A10_A10_010.fcs	HEK293_PACight1_PACAP38_A10_A10_010.fcs	stable_HEK293_PAClight1_10	stable_HEK293_PAClight1	10	300	6497.04
HEK293_PACight1_PACAP38_A10_A10_010.fcs	HEK293_PACight1_PACAP38_A10_A10_010.fcs	stable_HEK293_PAClight1_10	stable_HEK293_PAClight1	10	300	147.66
HEK293_PACight1_PACAP38_A10_A10_010.fcs	HEK293_PACight1_PACAP38_A10_A10_010.fcs	stable_HEK293_PAClight1_10	stable_HEK293_PAClight1	10	300	129.72
HEK293_PACight1_PACAP38_A10_A10_010.fcs	HEK293_PACight1_PACAP38_A10_A10_010.fcs	stable_HEK293_PAClight1_10	stable_HEK293_PAClight1	10	300	3589.38
HEK293_PACight1_PACAP38_A10_A10_010.fcs	HEK293_PACight1_PACAP38_A10_A10_010.fcs	stable_HEK293_PAClight1_10	stable_HEK293_PAClight1	10	300	2907.66
HEK293_PACight1_PACAP38_A10_A10_010.fcs	HEK293_PACight1_PACAP38_A10_A10_010.fcs	stable_HEK293_PAClight1_10	stable_HEK293_PAClight1	10	300	4385.64
HEK293_PACight1_PACAP38_A10_A10_010.fcs	HEK293_PACight1_PACAP38_A10_A10_010.fcs	stable_HEK293_PAClight1_10	stable_HEK293_PAClight1	10	300	136.62
HEK293_PACight1_PACAP38_A10_A10_010.fcs	HEK293_PACight1_PACAP38_A10_A10_010.fcs	stable_HEK293_PAClight1_10	stable_HEK293_PAClight1	10	300	4990.08
HEK293_PACight1_PACAP38_A10_A10_010.fcs	HEK293_PACight1_PACAP38_A10_A10_010.fcs	stable_HEK293_PAClight1_10	stable_HEK293_PAClight1	10	300	4596.78
HEK293_PACight1_PACAP38_A10_A10_010.fcs	HEK293_PACight1_PACAP38_A10_A10_010.fcs	stable_HEK293_PAClight1_10	stable_HEK293_PAClight1	10	300	6194.82
HEK293_PACight1_PACAP38_A10_A10_010.fcs	HEK293_PACight1_PACAP38_A10_A10_010.fcs	stable_HEK293_PAClight1_10	stable_HEK293_PAClight1	10	300	1184.04
HEK293_PACight1_PACAP38_A10_A10_010.fcs	HEK293_PACight1_PACAP38_A10_A10_010.fcs	stable_HEK293_PAClight1_10	stable_HEK293_PAClight1	10	300	77.28
HEK293_PACight1_PACAP38_A10_A10_010.fcs	HEK293_PACight1_PACAP38_A10_A10_010.fcs	stable_HEK293_PAClight1_10	stable_HEK293_PAClight1	10	300	8199.96
HEK293_PACight1_PACAP38_A10_A10_010.fcs	HEK293_PACight1_PACAP38_A10_A10_010.fcs	stable_HEK293_PAClight1_10	stable_HEK293_PAClight1	10	300	4380.12
HEK293_PACight1_PACAP38_A10_A10_010.fcs	HEK293_PACight1_PACAP38_A10_A10_010.fcs	stable_HEK293_PAClight1_10	stable_HEK293_PAClight1	10	300	5155.68
HEK293_PACight1_PACAP38_A10_A10_010.fcs	HEK293_PACight1_PACAP38_A10_A10_010.fcs	stable_HEK293_PAClight1_10	stable_HEK293_PAClight1	10	300	4279.38
HEK293_PACight1_PACAP38_A10_A10_010.fcs	HEK293_PACight1_PACAP38_A10_A10_010.fcs	stable_HEK293_PAClight1_10	stable_HEK293_PAClight1	10	300	5762.88
HEK293_PACight1_PACAP38_A10_A10_010.fcs	HEK293_PACight1_PACAP38_A10_A10_010.fcs	stable_HEK293_PAClight1_10	stable_HEK293_PAClight1	10	300	3909.54
HEK293_PACight1_PACAP38_A10_A10_010.fcs	HEK293_PACight1_PACAP38_A10_A10_010.fcs	stable_HEK293_PAClight1_10	stable_HEK293_PAClight1	10	300	8907.9
HEK293_PACight1_PACAP38_A10_A10_010.fcs	HEK293_PACight1_PACAP38_A10_A10_010.fcs	stable_HEK293_PAClight1_10	stable_HEK293_PAClight1	10	300	1980.3
HEK293_PACight1_PACAP38_A10_A10_010.fcs	HEK293_PACight1_PACAP38_A10_A10_010.fcs	stable_HEK293_PAClight1_10	stable_HEK293_PAClight1	10	300	6185.16
HEK293_PACight1_PACAP38_A10_A10_010.fcs	HEK293_PACight1_PACAP38_A10_A10_010.fcs	stable_HEK293_PAClight1_10	stable_HEK293_PAClight1	10	300	4950.06
HEK293_PACight1_PACAP38_A10_A10_010.fcs	HEK293_PACight1_PACAP38_A10_A10_010.fcs	stable_HEK293_PAClight1_10	stable_HEK293_PAClight1	10	300	5140.5
HEK293_PACight1_PACAP38_A10_A10_010.fcs	HEK293_PACight1_PACAP38_A10_A10_010.fcs	stable_HEK293_PAClight1_10	stable_HEK293_PAClight1	10	300	6745.44
HEK293_PACight1_PACAP38_A10_A10_010.fcs	HEK293_PACight1_PACAP38_A10_A10_010.fcs	stable_HEK293_PAClight1_10	stable_HEK293_PAClight1	10	300	3786.72
HEK293_PACight1_PACAP38_A10_A10_010.fcs	HEK293_PACight1_PACAP38_A10_A10_010.fcs	stable_HEK293_PAClight1_10	stable_HEK293_PAClight1	10	300	4334.58
HEK293_PACight1_PACAP38_A10_A10_010.fcs	HEK293_PACight1_PACAP38_A10_A10_010.fcs	stable_HEK293_PAClight1_10	stable_HEK293_PAClight1	10	300	6261.06
HEK293_PACight1_PACAP38_A10_A10_010.fcs	HEK293_PACight1_PACAP38_A10_A10_010.fcs	stable_HEK293_PAClight1_10	stable_HEK293_PAClight1	10	300	8899.62
HEK293_PACight1_PACAP38_A10_A10_010.fcs	HEK293_PACight1_PACAP38_A10_A10_010.fcs	stable_HEK293_PAClight1_10	stable_HEK293_PAClight1	10	300	829.38
HEK293_PACight1_PACAP38_A10_A10_010.fcs	HEK293_PACight1_PACAP38_A10_A10_010.fcs	stable_HEK293_PAClight1_10	stable_HEK293_PAClight1	10	300	5964.36
HEK293_PACight1_PACAP38_A10_A10_010.fcs	HEK293_PACight1_PACAP38_A10_A10_010.fcs	stable_HEK293_PAClight1_10	stable_HEK293_PAClight1	10	300	2311.5
HEK293_PACight1_PACAP38_A10_A10_010.fcs	HEK293_PACight1_PACAP38_A10_A10_010.fcs	stable_HEK293_PAClight1_10	stable_HEK293_PAClight1	10	300	2297.7
HEK293_PACight1_PACAP38_A10_A10_010.fcs	HEK293_PACight1_PACAP38_A10_A10_010.fcs	stable_HEK293_PAClight1_10	stable_HEK293_PAClight1	10	300	3389.28
HEK293_PACight1_PACAP38_A10_A10_010.fcs	HEK293_PACight1_PACAP38_A10_A10_010.fcs	stable_HEK293_PAClight1_10	stable_HEK293_PAClight1	10	300	6334.2
HEK293_PACight1_PACAP38_A10_A10_010.fcs	HEK293_PACight1_PACAP38_A10_A10_010.fcs	stable_HEK293_PAClight1_10	stable_HEK293_PAClight1	10	300	1889.22
HEK293_PACight1_PACAP38_A10_A10_010.fcs	HEK293_PACight1_PACAP38_A10_A10_010.fcs	stable_HEK293_PAClight1_10	stable_HEK293_PAClight1	10	300	4300.08
HEK293_PACight1_PACAP38_A10_A10_010.fcs	HEK293_PACight1_PACAP38_A10_A10_010.fcs	stable_HEK293_PAClight1_10	stable_HEK293_PAClight1	10	300	13121
HEK293_PACight1_PACAP38_A10_A10_010.fcs	HEK293_PACight1_PACAP38_A10_A10_010.fcs	stable_HEK293_PAClight1_10	stable_HEK293_PAClight1	10	300	175.26
HEK293_PACight1_PACAP38_A10_A10_010.fcs	HEK293_PACight1_PACAP38_A10_A10_010.fcs	stable_HEK293_PAClight1_10	stable_HEK293_PAClight1	10	300	2782.08
HEK293_PACight1_PACAP38_A10_A10_010.fcs	HEK293_PACight1_PACAP38_A10_A10_010.fcs	stable_HEK293_PAClight1_10	stable_HEK293_PAClight1	10	300	5231.58
HEK293_PACight1_PACAP38_A10_A10_010.fcs	HEK293_PACight1_PACAP38_A10_A10_010.fcs	stable_HEK293_PAClight1_10	stable_HEK293_PAClight1	10	300	7875.66
HEK293_PACight1_PACAP38_A10_A10_010.fcs	HEK293_PACight1_PACAP38_A10_A10_010.fcs	stable_HEK293_PAClight1_10	stable_HEK293_PAClight1	10	300	2466.06
HEK293_PACight1_PACAP38_A10_A10_010.fcs	HEK293_PACight1_PACAP38_A10_A10_010.fcs	stable_HEK293_PAClight1_10	stable_HEK293_PAClight1	10	300	291.18
HEK293_PACight1_PACAP38_A10_A10_010.fcs	HEK293_PACight1_PACAP38_A10_A10_010.fcs	stable_HEK293_PAClight1_10	stable_HEK293_PAClight1	10	300	3436.2
HEK293_PACight1_PACAP38_A10_A10_010.fcs	HEK293_PACight1_PACAP38_A10_A10_010.fcs	stable_HEK293_PAClight1_10	stable_HEK293_PAClight1	10	300	2688.24
HEK293_PACight1_PACAP38_A10_A10_010.fcs	HEK293_PACight1_PACAP38_A10_A10_010.fcs	stable_HEK293_PAClight1_10	stable_HEK293_PAClight1	10	300	2666.16
HEK293_PACight1_PACAP38_A10_A10_010.fcs	HEK293_PACight1_PACAP38_A10_A10_010.fcs	stable_HEK293_PAClight1_10	stable_HEK293_PAClight1	10	300	2557.14
HEK293_PACight1_PACAP38_A10_A10_010.fcs	HEK293_PACight1_PACAP38_A10_A10_010.fcs	stable_HEK293_PAClight1_10	stable_HEK293_PAClight1	10	300	3092.58
HEK293_PACight1_PACAP38_A10_A10_010.fcs	HEK293_PACight1_PACAP38_A10_A10_010.fcs	stable_HEK293_PAClight1_10	stable_HEK293_PAClight1	10	300	9753.84
HEK293_PACight1_PACAP38_A10_A10_010.fcs	HEK293_PACight1_PACAP38_A10_A10_010.fcs	stable_HEK293_PAClight1_10	stable_HEK293_PAClight1	10	300	8560.14
HEK293_PACight1_PACAP38_A10_A10_010.fcs	HEK293_PACight1_PACAP38_A10_A10_010.fcs	stable_HEK293_PAClight1_10	stable_HEK293_PAClight1	10	300	3539.7
HEK293_PACight1_PACAP38_A10_A10_010.fcs	HEK293_PACight1_PACAP38_A10_A10_010.fcs	stable_HEK293_PAClight1_10	stable_HEK293_PAClight1	10	300	3585.24
HEK293_PACight1_PACAP38_A10_A10_010.fcs	HEK293_PACight1_PACAP38_A10_A10_010.fcs	stable_HEK293_PAClight1_10	stable_HEK293_PAClight1	10	300	1275.12
HEK293_PACight1_PACAP38_A10_A10_010.fcs	HEK293_PACight1_PACAP38_A10_A10_010.fcs	stable_HEK293_PAClight1_10	stable_HEK293_PAClight1	10	300	4737.54
HEK293_PACight1_PACAP38_A10_A10_010.fcs	HEK293_PACight1_PACAP38_A10_A10_010.fcs	stable_HEK293_PAClight1_10	stable_HEK293_PAClight1	10	300	917.7
HEK293_PACight1_PACAP38_A10_A10_010.fcs	HEK293_PACight1_PACAP38_A10_A10_010.fcs	stable_HEK293_PAClight1_10	stable_HEK293_PAClight1	10	300	6116.16
HEK293_PACight1_PACAP38_A10_A10_010.fcs	HEK293_PACight1_PACAP38_A10_A10_010.fcs	stable_HEK293_PAClight1_10	stable_HEK293_PAClight1	10	300	4889.34
HEK293_PACight1_PACAP38_A10_A10_010.fcs	HEK293_PACight1_PACAP38_A10_A10_010.fcs	stable_HEK293_PAClight1_10	stable_HEK293_PAClight1	10	300	4015.8
HEK293_PACight1_PACAP38_A10_A10_010.fcs	HEK293_PACight1_PACAP38_A10_A10_010.fcs	stable_HEK293_PAClight1_10	stable_HEK293_PAClight1	10	300	4387.02
HEK293_PACight1_PACAP38_A10_A10_010.fcs	HEK293_PACight1_PACAP38_A10_A10_010.fcs	stable_HEK293_PAClight1_10	stable_HEK293_PAClight1	10	300	3447.24
HEK293_PACight1_PACAP38_A10_A10_010.fcs	HEK293_PACight1_PACAP38_A10_A10_010.fcs	stable_HEK293_PAClight1_10	stable_HEK293_PAClight1	10	300	4921.08
HEK293_PACight1_PACAP38_A10_A10_010.fcs	HEK293_PACight1_PACAP38_A10_A10_010.fcs	stable_HEK293_PAClight1_10	stable_HEK293_PAClight1	10	300	1949.94
HEK293_PACight1_PACAP38_A10_A10_010.fcs	HEK293_PACight1_PACAP38_A10_A10_010.fcs	stable_HEK293_PAClight1_10	stable_HEK293_PAClight1	10	300	3244.38
HEK293_PACight1_PACAP38_A10_A10_010.fcs	HEK293_PACight1_PACAP38_A10_A10_010.fcs	stable_HEK293_PAClight1_10	stable_HEK293_PAClight1	10	300	4026.84
HEK293_PACight1_PACAP38_A10_A10_010.fcs	HEK293_PACight1_PACAP38_A10_A10_010.fcs	stable_HEK293_PAClight1_10	stable_HEK293_PAClight1	10	300	3392.04
HEK293_PACight1_PACAP38_A10_A10_010.fcs	HEK293_PACight1_PACAP38_A10_A10_010.fcs	stable_HEK293_PAClight1_10	stable_HEK293_PAClight1	10	300	2373.6
HEK293_PACight1_PACAP38_A10_A10_010.fcs	HEK293_PACight1_PACAP38_A10_A10_010.fcs	stable_HEK293_PAClight1_10	stable_HEK293_PAClight1	10	300	6083.04
HEK293_PACight1_PACAP38_A10_A10_010.fcs	HEK293_PACight1_PACAP38_A10_A10_010.fcs	stable_HEK293_PAClight1_10	stable_HEK293_PAClight1	10	300	2951.82
HEK293_PACight1_PACAP38_A10_A10_010.fcs	HEK293_PACight1_PACAP38_A10_A10_010.fcs	stable_HEK293_PAClight1_10	stable_HEK293_PAClight1	10	300	3445.86
HEK293_PACight1_PACAP38_A10_A10_010.fcs	HEK293_PACight1_PACAP38_A10_A10_010.fcs	stable_HEK293_PAClight1_10	stable_HEK293_PAClight1	10	300	22961.8
HEK293_PACight1_PACAP38_A10_A10_010.fcs	HEK293_PACight1_PACAP38_A10_A10_010.fcs	stable_HEK293_PAClight1_10	stable_HEK293_PAClight1	10	300	3234.72
HEK293_PACight1_PACAP38_A10_A10_010.fcs	HEK293_PACight1_PACAP38_A10_A10_010.fcs	stable_HEK293_PAClight1_10	stable_HEK293_PAClight1	10	300	2227.32
HEK293_PACight1_PACAP38_A10_A10_010.fcs	HEK293_PACight1_PACAP38_A10_A10_010.fcs	stable_HEK293_PAClight1_10	stable_HEK293_PAClight1	10	300	8355.9
HEK293_PACight1_PACAP38_A10_A10_010.fcs	HEK293_PACight1_PACAP38_A10_A10_010.fcs	stable_HEK293_PAClight1_10	stable_HEK293_PAClight1	10	300	3750.84
HEK293_PACight1_PACAP38_A10_A10_010.fcs	HEK293_PACight1_PACAP38_A10_A10_010.fcs	stable_HEK293_PAClight1_10	stable_HEK293_PAClight1	10	300	9970.5
HEK293_PACight1_PACAP38_A10_A10_010.fcs	HEK293_PACight1_PACAP38_A10_A10_010.fcs	stable_HEK293_PAClight1_10	stable_HEK293_PAClight1	10	300	6288.66
HEK293_PACight1_PACAP38_A10_A10_010.fcs	HEK293_PACight1_PACAP38_A10_A10_010.fcs	stable_HEK293_PAClight1_10	stable_HEK293_PAClight1	10	300	3265.08
HEK293_PACight1_PACAP38_A10_A10_010.fcs	HEK293_PACight1_PACAP38_A10_A10_010.fcs	stable_HEK293_PAClight1_10	stable_HEK293_PAClight1	10	300	2486.76
HEK293_PACight1_PACAP38_A10_A10_010.fcs	HEK293_PACight1_PACAP38_A10_A10_010.fcs	stable_HEK293_PAClight1_10	stable_HEK293_PAClight1	10	300	12237.8
HEK293_PACight1_PACAP38_A10_A10_010.fcs	HEK293_PACight1_PACAP38_A10_A10_010.fcs	stable_HEK293_PAClight1_10	stable_HEK293_PAClight1	10	300	1264.08
HEK293_PACight1_PACAP38_A10_A10_010.fcs	HEK293_PACight1_PACAP38_A10_A10_010.fcs	stable_HEK293_PAClight1_10	stable_HEK293_PAClight1	10	300	7563.78
HEK293_PACight1_PACAP38_A10_A10_010.fcs	HEK293_PACight1_PACAP38_A10_A10_010.fcs	stable_HEK293_PAClight1_10	stable_HEK293_PAClight1	10	300	3485.88
HEK293_PACight1_PACAP38_A10_A10_010.fcs	HEK293_PACight1_PACAP38_A10_A10_010.fcs	stable_HEK293_PAClight1_10	stable_HEK293_PAClight1	10	300	4542.96
HEK293_PACight1_PACAP38_A10_A10_010.fcs	HEK293_PACight1_PACAP38_A10_A10_010.fcs	stable_HEK293_PAClight1_10	stable_HEK293_PAClight1	10	300	12709.8
HEK293_PACight1_PACAP38_A10_A10_010.fcs	HEK293_PACight1_PACAP38_A10_A10_010.fcs	stable_HEK293_PAClight1_10	stable_HEK293_PAClight1	10	300	4253.16
HEK293_PACight1_PACAP38_A10_A10_010.fcs	HEK293_PACight1_PACAP38_A10_A10_010.fcs	stable_HEK293_PAClight1_10	stable_HEK293_PAClight1	10	300	9247.38
HEK293_PACight1_PACAP38_A10_A10_010.fcs	HEK293_PACight1_PACAP38_A10_A10_010.fcs	stable_HEK293_PAClight1_10	stable_HEK293_PAClight1	10	300	6110.64
HEK293_PACight1_PACAP38_A10_A10_010.fcs	HEK293_PACight1_PACAP38_A10_A10_010.fcs	stable_HEK293_PAClight1_10	stable_HEK293_PAClight1	10	300	3640.44
HEK293_PACight1_PACAP38_A10_A10_010.fcs	HEK293_PACight1_PACAP38_A10_A10_010.fcs	stable_HEK293_PAClight1_10	stable_HEK293_PAClight1	10	300	4053.06
HEK293_PACight1_PACAP38_A10_A10_010.fcs	HEK293_PACight1_PACAP38_A10_A10_010.fcs	stable_HEK293_PAClight1_10	stable_HEK293_PAClight1	10	300	6832.38
HEK293_PACight1_PACAP38_A10_A10_010.fcs	HEK293_PACight1_PACAP38_A10_A10_010.fcs	stable_HEK293_PAClight1_10	stable_HEK293_PAClight1	10	300	2641.32
HEK293_PACight1_PACAP38_A10_A10_010.fcs	HEK293_PACight1_PACAP38_A10_A10_010.fcs	stable_HEK293_PAClight1_10	stable_HEK293_PAClight1	10	300	2664.78
HEK293_PACight1_PACAP38_A10_A10_010.fcs	HEK293_PACight1_PACAP38_A10_A10_010.fcs	stable_HEK293_PAClight1_10	stable_HEK293_PAClight1	10	300	6448.74
HEK293_PACight1_PACAP38_A10_A10_010.fcs	HEK293_PACight1_PACAP38_A10_A10_010.fcs	stable_HEK293_PAClight1_10	stable_HEK293_PAClight1	10	300	1556.64
HEK293_PACight1_PACAP38_A10_A10_010.fcs	HEK293_PACight1_PACAP38_A10_A10_010.fcs	stable_HEK293_PAClight1_10	stable_HEK293_PAClight1	10	300	994.98
HEK293_PACight1_PACAP38_A10_A10_010.fcs	HEK293_PACight1_PACAP38_A10_A10_010.fcs	stable_HEK293_PAClight1_10	stable_HEK293_PAClight1	10	300	2336.34
HEK293_PACight1_PACAP38_A10_A10_010.fcs	HEK293_PACight1_PACAP38_A10_A10_010.fcs	stable_HEK293_PAClight1_10	stable_HEK293_PAClight1	10	300	5083.92
HEK293_PACight1_PACAP38_A10_A10_010.fcs	HEK293_PACight1_PACAP38_A10_A10_010.fcs	stable_HEK293_PAClight1_10	stable_HEK293_PAClight1	10	300	3095.34
HEK293_PACight1_PACAP38_A10_A10_010.fcs	HEK293_PACight1_PACAP38_A10_A10_010.fcs	stable_HEK293_PAClight1_10	stable_HEK293_PAClight1	10	300	4073.76
HEK293_PACight1_PACAP38_A10_A10_010.fcs	HEK293_PACight1_PACAP38_A10_A10_010.fcs	stable_HEK293_PAClight1_10	stable_HEK293_PAClight1	10	300	25274.7
HEK293_PACight1_PACAP38_A10_A10_010.fcs	HEK293_PACight1_PACAP38_A10_A10_010.fcs	stable_HEK293_PAClight1_10	stable_HEK293_PAClight1	10	300	502.32
HEK293_PACight1_PACAP38_A10_A10_010.fcs	HEK293_PACight1_PACAP38_A10_A10_010.fcs	stable_HEK293_PAClight1_10	stable_HEK293_PAClight1	10	300	3746.7
HEK293_PACight1_PACAP38_A10_A10_010.fcs	HEK293_PACight1_PACAP38_A10_A10_010.fcs	stable_HEK293_PAClight1_10	stable_HEK293_PAClight1	10	300	10300.3
HEK293_PACight1_PACAP38_A10_A10_010.fcs	HEK293_PACight1_PACAP38_A10_A10_010.fcs	stable_HEK293_PAClight1_10	stable_HEK293_PAClight1	10	300	10773.7
HEK293_PACight1_PACAP38_A10_A10_010.fcs	HEK293_PACight1_PACAP38_A10_A10_010.fcs	stable_HEK293_PAClight1_10	stable_HEK293_PAClight1	10	300	4965.24
HEK293_PACight1_PACAP38_A10_A10_010.fcs	HEK293_PACight1_PACAP38_A10_A10_010.fcs	stable_HEK293_PAClight1_10	stable_HEK293_PAClight1	10	300	9818.7
HEK293_PACight1_PACAP38_A10_A10_010.fcs	HEK293_PACight1_PACAP38_A10_A10_010.fcs	stable_HEK293_PAClight1_10	stable_HEK293_PAClight1	10	300	6833.76
HEK293_PACight1_PACAP38_A10_A10_010.fcs	HEK293_PACight1_PACAP38_A10_A10_010.fcs	stable_HEK293_PAClight1_10	stable_HEK293_PAClight1	10	300	7021.44
HEK293_PACight1_PACAP38_A10_A10_010.fcs	HEK293_PACight1_PACAP38_A10_A10_010.fcs	stable_HEK293_PAClight1_10	stable_HEK293_PAClight1	10	300	4507.08
HEK293_PACight1_PACAP38_A10_A10_010.fcs	HEK293_PACight1_PACAP38_A10_A10_010.fcs	stable_HEK293_PAClight1_10	stable_HEK293_PAClight1	10	300	4384.26
HEK293_PACight1_PACAP38_A10_A10_010.fcs	HEK293_PACight1_PACAP38_A10_A10_010.fcs	stable_HEK293_PAClight1_10	stable_HEK293_PAClight1	10	300	3990.96
HEK293_PACight1_PACAP38_A10_A10_010.fcs	HEK293_PACight1_PACAP38_A10_A10_010.fcs	stable_HEK293_PAClight1_10	stable_HEK293_PAClight1	10	300	5260.56
HEK293_PACight1_PACAP38_A10_A10_010.fcs	HEK293_PACight1_PACAP38_A10_A10_010.fcs	stable_HEK293_PAClight1_10	stable_HEK293_PAClight1	10	300	7607.94
HEK293_PACight1_PACAP38_A10_A10_010.fcs	HEK293_PACight1_PACAP38_A10_A10_010.fcs	stable_HEK293_PAClight1_10	stable_HEK293_PAClight1	10	300	1230.96
HEK293_PACight1_PACAP38_A10_A10_010.fcs	HEK293_PACight1_PACAP38_A10_A10_010.fcs	stable_HEK293_PAClight1_10	stable_HEK293_PAClight1	10	300	4330.44
HEK293_PACight1_PACAP38_A10_A10_010.fcs	HEK293_PACight1_PACAP38_A10_A10_010.fcs	stable_HEK293_PAClight1_10	stable_HEK293_PAClight1	10	300	3077.4
HEK293_PACight1_PACAP38_A10_A10_010.fcs	HEK293_PACight1_PACAP38_A10_A10_010.fcs	stable_HEK293_PAClight1_10	stable_HEK293_PAClight1	10	300	4098.6
HEK293_PACight1_PACAP38_A10_A10_010.fcs	HEK293_PACight1_PACAP38_A10_A10_010.fcs	stable_HEK293_PAClight1_10	stable_HEK293_PAClight1	10	300	10087.8
HEK293_PACight1_PACAP38_A10_A10_010.fcs	HEK293_PACight1_PACAP38_A10_A10_010.fcs	stable_HEK293_PAClight1_10	stable_HEK293_PAClight1	10	300	1044.66
HEK293_PACight1_PACAP38_A10_A10_010.fcs	HEK293_PACight1_PACAP38_A10_A10_010.fcs	stable_HEK293_PAClight1_10	stable_HEK293_PAClight1	10	300	3047.04
HEK293_PACight1_PACAP38_A10_A10_010.fcs	HEK293_PACight1_PACAP38_A10_A10_010.fcs	stable_HEK293_PAClight1_10	stable_HEK293_PAClight1	10	300	3207.12
HEK293_PACight1_PACAP38_A10_A10_010.fcs	HEK293_PACight1_PACAP38_A10_A10_010.fcs	stable_HEK293_PAClight1_10	stable_HEK293_PAClight1	10	300	133.86
HEK293_PACight1_PACAP38_A10_A10_010.fcs	HEK293_PACight1_PACAP38_A10_A10_010.fcs	stable_HEK293_PAClight1_10	stable_HEK293_PAClight1	10	300	3111.9
HEK293_PACight1_PACAP38_A10_A10_010.fcs	HEK293_PACight1_PACAP38_A10_A10_010.fcs	stable_HEK293_PAClight1_10	stable_HEK293_PAClight1	10	300	3324.42
HEK293_PACight1_PACAP38_A10_A10_010.fcs	HEK293_PACight1_PACAP38_A10_A10_010.fcs	stable_HEK293_PAClight1_10	stable_HEK293_PAClight1	10	300	7039.38
HEK293_PACight1_PACAP38_A10_A10_010.fcs	HEK293_PACight1_PACAP38_A10_A10_010.fcs	stable_HEK293_PAClight1_10	stable_HEK293_PAClight1	10	300	3728.76
HEK293_PACight1_PACAP38_A10_A10_010.fcs	HEK293_PACight1_PACAP38_A10_A10_010.fcs	stable_HEK293_PAClight1_10	stable_HEK293_PAClight1	10	300	13664.8
HEK293_PACight1_PACAP38_A10_A10_010.fcs	HEK293_PACight1_PACAP38_A10_A10_010.fcs	stable_HEK293_PAClight1_10	stable_HEK293_PAClight1	10	300	5863.62
HEK293_PACight1_PACAP38_A10_A10_010.fcs	HEK293_PACight1_PACAP38_A10_A10_010.fcs	stable_HEK293_PAClight1_10	stable_HEK293_PAClight1	10	300	10793
HEK293_PACight1_PACAP38_A10_A10_010.fcs	HEK293_PACight1_PACAP38_A10_A10_010.fcs	stable_HEK293_PAClight1_10	stable_HEK293_PAClight1	10	300	3669.42
HEK293_PACight1_PACAP38_A10_A10_010.fcs	HEK293_PACight1_PACAP38_A10_A10_010.fcs	stable_HEK293_PAClight1_10	stable_HEK293_PAClight1	10	300	4244.88
HEK293_PACight1_PACAP38_A10_A10_010.fcs	HEK293_PACight1_PACAP38_A10_A10_010.fcs	stable_HEK293_PAClight1_10	stable_HEK293_PAClight1	10	300	6922.08
HEK293_PACight1_PACAP38_A10_A10_010.fcs	HEK293_PACight1_PACAP38_A10_A10_010.fcs	stable_HEK293_PAClight1_10	stable_HEK293_PAClight1	10	300	5431.68
HEK293_PACight1_PACAP38_A10_A10_010.fcs	HEK293_PACight1_PACAP38_A10_A10_010.fcs	stable_HEK293_PAClight1_10	stable_HEK293_PAClight1	10	300	1760.88
HEK293_PACight1_PACAP38_A10_A10_010.fcs	HEK293_PACight1_PACAP38_A10_A10_010.fcs	stable_HEK293_PAClight1_10	stable_HEK293_PAClight1	10	300	10885.4
HEK293_PACight1_PACAP38_A10_A10_010.fcs	HEK293_PACight1_PACAP38_A10_A10_010.fcs	stable_HEK293_PAClight1_10	stable_HEK293_PAClight1	10	300	4454.64
HEK293_PACight1_PACAP38_A10_A10_010.fcs	HEK293_PACight1_PACAP38_A10_A10_010.fcs	stable_HEK293_PAClight1_10	stable_HEK293_PAClight1	10	300	3931.62
HEK293_PACight1_PACAP38_A10_A10_010.fcs	HEK293_PACight1_PACAP38_A10_A10_010.fcs	stable_HEK293_PAClight1_10	stable_HEK293_PAClight1	10	300	2541.96
HEK293_PACight1_PACAP38_A10_A10_010.fcs	HEK293_PACight1_PACAP38_A10_A10_010.fcs	stable_HEK293_PAClight1_10	stable_HEK293_PAClight1	10	300	3013.92
HEK293_PACight1_PACAP38_A10_A10_010.fcs	HEK293_PACight1_PACAP38_A10_A10_010.fcs	stable_HEK293_PAClight1_10	stable_HEK293_PAClight1	10	300	3495.54
HEK293_PACight1_PACAP38_A10_A10_010.fcs	HEK293_PACight1_PACAP38_A10_A10_010.fcs	stable_HEK293_PAClight1_10	stable_HEK293_PAClight1	10	300	8126.82
HEK293_PACight1_PACAP38_A10_A10_010.fcs	HEK293_PACight1_PACAP38_A10_A10_010.fcs	stable_HEK293_PAClight1_10	stable_HEK293_PAClight1	10	300	13881.4
HEK293_PACight1_PACAP38_A10_A10_010.fcs	HEK293_PACight1_PACAP38_A10_A10_010.fcs	stable_HEK293_PAClight1_10	stable_HEK293_PAClight1	10	300	5750.46
HEK293_PACight1_PACAP38_A10_A10_010.fcs	HEK293_PACight1_PACAP38_A10_A10_010.fcs	stable_HEK293_PAClight1_10	stable_HEK293_PAClight1	10	300	8353.14
HEK293_PACight1_PACAP38_A10_A10_010.fcs	HEK293_PACight1_PACAP38_A10_A10_010.fcs	stable_HEK293_PAClight1_10	stable_HEK293_PAClight1	10	300	7487.88
HEK293_PACight1_PACAP38_A10_A10_010.fcs	HEK293_PACight1_PACAP38_A10_A10_010.fcs	stable_HEK293_PAClight1_10	stable_HEK293_PAClight1	10	300	6488.76
HEK293_PACight1_PACAP38_A10_A10_010.fcs	HEK293_PACight1_PACAP38_A10_A10_010.fcs	stable_HEK293_PAClight1_10	stable_HEK293_PAClight1	10	300	15425.6
HEK293_PACight1_PACAP38_A10_A10_010.fcs	HEK293_PACight1_PACAP38_A10_A10_010.fcs	stable_HEK293_PAClight1_10	stable_HEK293_PAClight1	10	300	2261.82
HEK293_PACight1_PACAP38_A10_A10_010.fcs	HEK293_PACight1_PACAP38_A10_A10_010.fcs	stable_HEK293_PAClight1_10	stable_HEK293_PAClight1	10	300	9120.42
HEK293_PACight1_PACAP38_A10_A10_010.fcs	HEK293_PACight1_PACAP38_A10_A10_010.fcs	stable_HEK293_PAClight1_10	stable_HEK293_PAClight1	10	300	15157.9
HEK293_PACight1_PACAP38_A10_A10_010.fcs	HEK293_PACight1_PACAP38_A10_A10_010.fcs	stable_HEK293_PAClight1_10	stable_HEK293_PAClight1	10	300	2949.06
HEK293_PACight1_PACAP38_A10_A10_010.fcs	HEK293_PACight1_PACAP38_A10_A10_010.fcs	stable_HEK293_PAClight1_10	stable_HEK293_PAClight1	10	300	5444.1
HEK293_PACight1_PACAP38_A10_A10_010.fcs	HEK293_PACight1_PACAP38_A10_A10_010.fcs	stable_HEK293_PAClight1_10	stable_HEK293_PAClight1	10	300	3443.1
HEK293_PACight1_PACAP38_A10_A10_010.fcs	HEK293_PACight1_PACAP38_A10_A10_010.fcs	stable_HEK293_PAClight1_10	stable_HEK293_PAClight1	10	300	5693.88
HEK293_PACight1_PACAP38_A10_A10_010.fcs	HEK293_PACight1_PACAP38_A10_A10_010.fcs	stable_HEK293_PAClight1_10	stable_HEK293_PAClight1	10	300	6922.08
HEK293_PACight1_PACAP38_A10_A10_010.fcs	HEK293_PACight1_PACAP38_A10_A10_010.fcs	stable_HEK293_PAClight1_10	stable_HEK293_PAClight1	10	300	9095.58
HEK293_PACight1_PACAP38_A10_A10_010.fcs	HEK293_PACight1_PACAP38_A10_A10_010.fcs	stable_HEK293_PAClight1_10	stable_HEK293_PAClight1	10	300	2027.22
HEK293_PACight1_PACAP38_A10_A10_010.fcs	HEK293_PACight1_PACAP38_A10_A10_010.fcs	stable_HEK293_PAClight1_10	stable_HEK293_PAClight1	10	300	1290.3
HEK293_PACight1_PACAP38_A10_A10_010.fcs	HEK293_PACight1_PACAP38_A10_A10_010.fcs	stable_HEK293_PAClight1_10	stable_HEK293_PAClight1	10	300	1737.42
HEK293_PACight1_PACAP38_A10_A10_010.fcs	HEK293_PACight1_PACAP38_A10_A10_010.fcs	stable_HEK293_PAClight1_10	stable_HEK293_PAClight1	10	300	4627.14
HEK293_PACight1_PACAP38_A10_A10_010.fcs	HEK293_PACight1_PACAP38_A10_A10_010.fcs	stable_HEK293_PAClight1_10	stable_HEK293_PAClight1	10	300	4491.9
HEK293_PACight1_PACAP38_A10_A10_010.fcs	HEK293_PACight1_PACAP38_A10_A10_010.fcs	stable_HEK293_PAClight1_10	stable_HEK293_PAClight1	10	300	4748.58
HEK293_PACight1_PACAP38_A10_A10_010.fcs	HEK293_PACight1_PACAP38_A10_A10_010.fcs	stable_HEK293_PAClight1_10	stable_HEK293_PAClight1	10	300	3258.18
HEK293_PACight1_PACAP38_A10_A10_010.fcs	HEK293_PACight1_PACAP38_A10_A10_010.fcs	stable_HEK293_PAClight1_10	stable_HEK293_PAClight1	10	300	9268.08
HEK293_PACight1_PACAP38_A10_A10_010.fcs	HEK293_PACight1_PACAP38_A10_A10_010.fcs	stable_HEK293_PAClight1_10	stable_HEK293_PAClight1	10	300	3986.82
HEK293_PACight1_PACAP38_A10_A10_010.fcs	HEK293_PACight1_PACAP38_A10_A10_010.fcs	stable_HEK293_PAClight1_10	stable_HEK293_PAClight1	10	300	7155.3
HEK293_PACight1_PACAP38_A10_A10_010.fcs	HEK293_PACight1_PACAP38_A10_A10_010.fcs	stable_HEK293_PAClight1_10	stable_HEK293_PAClight1	10	300	11717.6
HEK293_PACight1_PACAP38_A10_A10_010.fcs	HEK293_PACight1_PACAP38_A10_A10_010.fcs	stable_HEK293_PAClight1_10	stable_HEK293_PAClight1	10	300	579.6
HEK293_PACight1_PACAP38_A10_A10_010.fcs	HEK293_PACight1_PACAP38_A10_A10_010.fcs	stable_HEK293_PAClight1_10	stable_HEK293_PAClight1	10	300	5793.24
HEK293_PACight1_PACAP38_A10_A10_010.fcs	HEK293_PACight1_PACAP38_A10_A10_010.fcs	stable_HEK293_PAClight1_10	stable_HEK293_PAClight1	10	300	5230.2
HEK293_PACight1_PACAP38_A10_A10_010.fcs	HEK293_PACight1_PACAP38_A10_A10_010.fcs	stable_HEK293_PAClight1_10	stable_HEK293_PAClight1	10	300	7752.84
HEK293_PACight1_PACAP38_A10_A10_010.fcs	HEK293_PACight1_PACAP38_A10_A10_010.fcs	stable_HEK293_PAClight1_10	stable_HEK293_PAClight1	10	300	4487.76
HEK293_PACight1_PACAP38_A10_A10_010.fcs	HEK293_PACight1_PACAP38_A10_A10_010.fcs	stable_HEK293_PAClight1_10	stable_HEK293_PAClight1	10	300	4.14
HEK293_PACight1_PACAP38_A10_A10_010.fcs	HEK293_PACight1_PACAP38_A10_A10_010.fcs	stable_HEK293_PAClight1_10	stable_HEK293_PAClight1	10	300	4375.98
HEK293_PACight1_PACAP38_A10_A10_010.fcs	HEK293_PACight1_PACAP38_A10_A10_010.fcs	stable_HEK293_PAClight1_10	stable_HEK293_PAClight1	10	300	6640.56
HEK293_PACight1_PACAP38_A10_A10_010.fcs	HEK293_PACight1_PACAP38_A10_A10_010.fcs	stable_HEK293_PAClight1_10	stable_HEK293_PAClight1	10	300	1863
HEK293_PACight1_PACAP38_A10_A10_010.fcs	HEK293_PACight1_PACAP38_A10_A10_010.fcs	stable_HEK293_PAClight1_10	stable_HEK293_PAClight1	10	300	5893.98
HEK293_PACight1_PACAP38_A10_A10_010.fcs	HEK293_PACight1_PACAP38_A10_A10_010.fcs	stable_HEK293_PAClight1_10	stable_HEK293_PAClight1	10	300	73.14
HEK293_PACight1_PACAP38_A10_A10_010.fcs	HEK293_PACight1_PACAP38_A10_A10_010.fcs	stable_HEK293_PAClight1_10	stable_HEK293_PAClight1	10	300	270.48
HEK293_PACight1_PACAP38_A10_A10_010.fcs	HEK293_PACight1_PACAP38_A10_A10_010.fcs	stable_HEK293_PAClight1_10	stable_HEK293_PAClight1	10	300	6252.78
HEK293_PACight1_PACAP38_A10_A10_010.fcs	HEK293_PACight1_PACAP38_A10_A10_010.fcs	stable_HEK293_PAClight1_10	stable_HEK293_PAClight1	10	300	3168.48
HEK293_PACight1_PACAP38_A10_A10_010.fcs	HEK293_PACight1_PACAP38_A10_A10_010.fcs	stable_HEK293_PAClight1_10	stable_HEK293_PAClight1	10	300	2768.28
HEK293_PACight1_PACAP38_A10_A10_010.fcs	HEK293_PACight1_PACAP38_A10_A10_010.fcs	stable_HEK293_PAClight1_10	stable_HEK293_PAClight1	10	300	11866.6
HEK293_PACight1_PACAP38_A10_A10_010.fcs	HEK293_PACight1_PACAP38_A10_A10_010.fcs	stable_HEK293_PAClight1_10	stable_HEK293_PAClight1	10	300	60.72
HEK293_PACight1_PACAP38_A10_A10_010.fcs	HEK293_PACight1_PACAP38_A10_A10_010.fcs	stable_HEK293_PAClight1_10	stable_HEK293_PAClight1	10	300	3990.96
HEK293_PACight1_PACAP38_A10_A10_010.fcs	HEK293_PACight1_PACAP38_A10_A10_010.fcs	stable_HEK293_PAClight1_10	stable_HEK293_PAClight1	10	300	3772.92
HEK293_PACight1_PACAP38_A10_A10_010.fcs	HEK293_PACight1_PACAP38_A10_A10_010.fcs	stable_HEK293_PAClight1_10	stable_HEK293_PAClight1	10	300	1088.82
HEK293_PACight1_PACAP38_A10_A10_010.fcs	HEK293_PACight1_PACAP38_A10_A10_010.fcs	stable_HEK293_PAClight1_10	stable_HEK293_PAClight1	10	300	2964.24
HEK293_PACight1_PACAP38_A10_A10_010.fcs	HEK293_PACight1_PACAP38_A10_A10_010.fcs	stable_HEK293_PAClight1_10	stable_HEK293_PAClight1	10	300	4275.24
HEK293_PACight1_PACAP38_A10_A10_010.fcs	HEK293_PACight1_PACAP38_A10_A10_010.fcs	stable_HEK293_PAClight1_10	stable_HEK293_PAClight1	10	300	238.74
HEK293_PACight1_PACAP38_A10_A10_010.fcs	HEK293_PACight1_PACAP38_A10_A10_010.fcs	stable_HEK293_PAClight1_10	stable_HEK293_PAClight1	10	300	2196.96
HEK293_PACight1_PACAP38_A10_A10_010.fcs	HEK293_PACight1_PACAP38_A10_A10_010.fcs	stable_HEK293_PAClight1_10	stable_HEK293_PAClight1	10	300	4600.92
HEK293_PACight1_PACAP38_A10_A10_010.fcs	HEK293_PACight1_PACAP38_A10_A10_010.fcs	stable_HEK293_PAClight1_10	stable_HEK293_PAClight1	10	300	6429.42
HEK293_PACight1_PACAP38_A10_A10_010.fcs	HEK293_PACight1_PACAP38_A10_A10_010.fcs	stable_HEK293_PAClight1_10	stable_HEK293_PAClight1	10	300	565.8
HEK293_PACight1_PACAP38_A10_A10_010.fcs	HEK293_PACight1_PACAP38_A10_A10_010.fcs	stable_HEK293_PAClight1_10	stable_HEK293_PAClight1	10	300	2646.84
HEK293_PACight1_PACAP38_A10_A10_010.fcs	HEK293_PACight1_PACAP38_A10_A10_010.fcs	stable_HEK293_PAClight1_10	stable_HEK293_PAClight1	10	300	1792.62
HEK293_PACight1_PACAP38_A10_A10_010.fcs	HEK293_PACight1_PACAP38_A10_A10_010.fcs	stable_HEK293_PAClight1_10	stable_HEK293_PAClight1	10	300	3183.66
HEK293_PACight1_PACAP38_A10_A10_010.fcs	HEK293_PACight1_PACAP38_A10_A10_010.fcs	stable_HEK293_PAClight1_10	stable_HEK293_PAClight1	10	300	1276.5
HEK293_PACight1_PACAP38_A10_A10_010.fcs	HEK293_PACight1_PACAP38_A10_A10_010.fcs	stable_HEK293_PAClight1_10	stable_HEK293_PAClight1	10	300	6273.48
HEK293_PACight1_PACAP38_A10_A10_010.fcs	HEK293_PACight1_PACAP38_A10_A10_010.fcs	stable_HEK293_PAClight1_10	stable_HEK293_PAClight1	10	300	4972.14
HEK293_PACight1_PACAP38_A10_A10_010.fcs	HEK293_PACight1_PACAP38_A10_A10_010.fcs	stable_HEK293_PAClight1_10	stable_HEK293_PAClight1	10	300	5322.66
HEK293_PACight1_PACAP38_A10_A10_010.fcs	HEK293_PACight1_PACAP38_A10_A10_010.fcs	stable_HEK293_PAClight1_10	stable_HEK293_PAClight1	10	300	3185.04
HEK293_PACight1_PACAP38_A10_A10_010.fcs	HEK293_PACight1_PACAP38_A10_A10_010.fcs	stable_HEK293_PAClight1_10	stable_HEK293_PAClight1	10	300	1943.04
HEK293_PACight1_PACAP38_A10_A10_010.fcs	HEK293_PACight1_PACAP38_A10_A10_010.fcs	stable_HEK293_PAClight1_10	stable_HEK293_PAClight1	10	300	5566.92
HEK293_PACight1_PACAP38_A10_A10_010.fcs	HEK293_PACight1_PACAP38_A10_A10_010.fcs	stable_HEK293_PAClight1_10	stable_HEK293_PAClight1	10	300	3986.82
HEK293_PACight1_PACAP38_A10_A10_010.fcs	HEK293_PACight1_PACAP38_A10_A10_010.fcs	stable_HEK293_PAClight1_10	stable_HEK293_PAClight1	10	300	448.5
HEK293_PACight1_PACAP38_A10_A10_010.fcs	HEK293_PACight1_PACAP38_A10_A10_010.fcs	stable_HEK293_PAClight1_10	stable_HEK293_PAClight1	10	300	4475.34
HEK293_PACight1_PACAP38_A10_A10_010.fcs	HEK293_PACight1_PACAP38_A10_A10_010.fcs	stable_HEK293_PAClight1_10	stable_HEK293_PAClight1	10	300	3127.08
HEK293_PACight1_PACAP38_A10_A10_010.fcs	HEK293_PACight1_PACAP38_A10_A10_010.fcs	stable_HEK293_PAClight1_10	stable_HEK293_PAClight1	10	300	12157.8
HEK293_PACight1_PACAP38_A10_A10_010.fcs	HEK293_PACight1_PACAP38_A10_A10_010.fcs	stable_HEK293_PAClight1_10	stable_HEK293_PAClight1	10	300	997.74
HEK293_PACight1_PACAP38_A10_A10_010.fcs	HEK293_PACight1_PACAP38_A10_A10_010.fcs	stable_HEK293_PAClight1_10	stable_HEK293_PAClight1	10	300	5234.34
HEK293_PACight1_PACAP38_A10_A10_010.fcs	HEK293_PACight1_PACAP38_A10_A10_010.fcs	stable_HEK293_PAClight1_10	stable_HEK293_PAClight1	10	300	3053.94
HEK293_PACight1_PACAP38_A10_A10_010.fcs	HEK293_PACight1_PACAP38_A10_A10_010.fcs	stable_HEK293_PAClight1_10	stable_HEK293_PAClight1	10	300	4030.98
HEK293_PACight1_PACAP38_A10_A10_010.fcs	HEK293_PACight1_PACAP38_A10_A10_010.fcs	stable_HEK293_PAClight1_10	stable_HEK293_PAClight1	10	300	7947.42
HEK293_PACight1_PACAP38_A10_A10_010.fcs	HEK293_PACight1_PACAP38_A10_A10_010.fcs	stable_HEK293_PAClight1_10	stable_HEK293_PAClight1	10	300	3745.32
HEK293_PACight1_PACAP38_A10_A10_010.fcs	HEK293_PACight1_PACAP38_A10_A10_010.fcs	stable_HEK293_PAClight1_10	stable_HEK293_PAClight1	10	300	1684.98
HEK293_PACight1_PACAP38_A10_A10_010.fcs	HEK293_PACight1_PACAP38_A10_A10_010.fcs	stable_HEK293_PAClight1_10	stable_HEK293_PAClight1	10	300	3020.82
HEK293_PACight1_PACAP38_A10_A10_010.fcs	HEK293_PACight1_PACAP38_A10_A10_010.fcs	stable_HEK293_PAClight1_10	stable_HEK293_PAClight1	10	300	11168.3
HEK293_PACight1_PACAP38_A10_A10_010.fcs	HEK293_PACight1_PACAP38_A10_A10_010.fcs	stable_HEK293_PAClight1_10	stable_HEK293_PAClight1	10	300	1075.02
HEK293_PACight1_PACAP38_A10_A10_010.fcs	HEK293_PACight1_PACAP38_A10_A10_010.fcs	stable_HEK293_PAClight1_10	stable_HEK293_PAClight1	10	300	4257.3
HEK293_PACight1_PACAP38_A10_A10_010.fcs	HEK293_PACight1_PACAP38_A10_A10_010.fcs	stable_HEK293_PAClight1_10	stable_HEK293_PAClight1	10	300	128.34
HEK293_PACight1_PACAP38_A10_A10_010.fcs	HEK293_PACight1_PACAP38_A10_A10_010.fcs	stable_HEK293_PAClight1_10	stable_HEK293_PAClight1	10	300	6365.94
HEK293_PACight1_PACAP38_A10_A10_010.fcs	HEK293_PACight1_PACAP38_A10_A10_010.fcs	stable_HEK293_PAClight1_10	stable_HEK293_PAClight1	10	300	4854.84
HEK293_PACight1_PACAP38_A10_A10_010.fcs	HEK293_PACight1_PACAP38_A10_A10_010.fcs	stable_HEK293_PAClight1_10	stable_HEK293_PAClight1	10	300	3779.82
HEK293_PACight1_PACAP38_A10_A10_010.fcs	HEK293_PACight1_PACAP38_A10_A10_010.fcs	stable_HEK293_PAClight1_10	stable_HEK293_PAClight1	10	300	5663.52
HEK293_PACight1_PACAP38_A10_A10_010.fcs	HEK293_PACight1_PACAP38_A10_A10_010.fcs	stable_HEK293_PAClight1_10	stable_HEK293_PAClight1	10	300	3488.64
HEK293_PACight1_PACAP38_A10_A10_010.fcs	HEK293_PACight1_PACAP38_A10_A10_010.fcs	stable_HEK293_PAClight1_10	stable_HEK293_PAClight1	10	300	3633.54
HEK293_PACight1_PACAP38_A10_A10_010.fcs	HEK293_PACight1_PACAP38_A10_A10_010.fcs	stable_HEK293_PAClight1_10	stable_HEK293_PAClight1	10	300	4168.98
HEK293_PACight1_PACAP38_A10_A10_010.fcs	HEK293_PACight1_PACAP38_A10_A10_010.fcs	stable_HEK293_PAClight1_10	stable_HEK293_PAClight1	10	300	4916.94
HEK293_PACight1_PACAP38_A10_A10_010.fcs	HEK293_PACight1_PACAP38_A10_A10_010.fcs	stable_HEK293_PAClight1_10	stable_HEK293_PAClight1	10	300	5090.82
HEK293_PACight1_PACAP38_A10_A10_010.fcs	HEK293_PACight1_PACAP38_A10_A10_010.fcs	stable_HEK293_PAClight1_10	stable_HEK293_PAClight1	10	300	143.52
HEK293_PACight1_PACAP38_A10_A10_010.fcs	HEK293_PACight1_PACAP38_A10_A10_010.fcs	stable_HEK293_PAClight1_10	stable_HEK293_PAClight1	10	300	1811.94
HEK293_PACight1_PACAP38_A10_A10_010.fcs	HEK293_PACight1_PACAP38_A10_A10_010.fcs	stable_HEK293_PAClight1_10	stable_HEK293_PAClight1	10	300	3234.72
HEK293_PACight1_PACAP38_A10_A10_010.fcs	HEK293_PACight1_PACAP38_A10_A10_010.fcs	stable_HEK293_PAClight1_10	stable_HEK293_PAClight1	10	300	4939.02
HEK293_PACight1_PACAP38_A10_A10_010.fcs	HEK293_PACight1_PACAP38_A10_A10_010.fcs	stable_HEK293_PAClight1_10	stable_HEK293_PAClight1	10	300	2584.74
HEK293_PACight1_PACAP38_A10_A10_010.fcs	HEK293_PACight1_PACAP38_A10_A10_010.fcs	stable_HEK293_PAClight1_10	stable_HEK293_PAClight1	10	300	4807.92
HEK293_PACight1_PACAP38_A10_A10_010.fcs	HEK293_PACight1_PACAP38_A10_A10_010.fcs	stable_HEK293_PAClight1_10	stable_HEK293_PAClight1	10	300	9290.16
HEK293_PACight1_PACAP38_A10_A10_010.fcs	HEK293_PACight1_PACAP38_A10_A10_010.fcs	stable_HEK293_PAClight1_10	stable_HEK293_PAClight1	10	300	5257.8
HEK293_PACight1_PACAP38_A10_A10_010.fcs	HEK293_PACight1_PACAP38_A10_A10_010.fcs	stable_HEK293_PAClight1_10	stable_HEK293_PAClight1	10	300	4280.76
HEK293_PACight1_PACAP38_A10_A10_010.fcs	HEK293_PACight1_PACAP38_A10_A10_010.fcs	stable_HEK293_PAClight1_10	stable_HEK293_PAClight1	10	300	463.68
HEK293_PACight1_PACAP38_A10_A10_010.fcs	HEK293_PACight1_PACAP38_A10_A10_010.fcs	stable_HEK293_PAClight1_10	stable_HEK293_PAClight1	10	300	3881.94
HEK293_PACight1_PACAP38_A10_A10_010.fcs	HEK293_PACight1_PACAP38_A10_A10_010.fcs	stable_HEK293_PAClight1_10	stable_HEK293_PAClight1	10	300	6167.22
HEK293_PACight1_PACAP38_A10_A10_010.fcs	HEK293_PACight1_PACAP38_A10_A10_010.fcs	stable_HEK293_PAClight1_10	stable_HEK293_PAClight1	10	300	7443.72
HEK293_PACight1_PACAP38_A10_A10_010.fcs	HEK293_PACight1_PACAP38_A10_A10_010.fcs	stable_HEK293_PAClight1_10	stable_HEK293_PAClight1	10	300	2984.94
HEK293_PACight1_PACAP38_A10_A10_010.fcs	HEK293_PACight1_PACAP38_A10_A10_010.fcs	stable_HEK293_PAClight1_10	stable_HEK293_PAClight1	10	300	4353.9
HEK293_PACight1_PACAP38_A10_A10_010.fcs	HEK293_PACight1_PACAP38_A10_A10_010.fcs	stable_HEK293_PAClight1_10	stable_HEK293_PAClight1	10	300	7798.38
HEK293_PACight1_PACAP38_A10_A10_010.fcs	HEK293_PACight1_PACAP38_A10_A10_010.fcs	stable_HEK293_PAClight1_10	stable_HEK293_PAClight1	10	300	1230.96
HEK293_PACight1_PACAP38_A10_A10_010.fcs	HEK293_PACight1_PACAP38_A10_A10_010.fcs	stable_HEK293_PAClight1_10	stable_HEK293_PAClight1	10	300	7696.26
HEK293_PACight1_PACAP38_A10_A10_010.fcs	HEK293_PACight1_PACAP38_A10_A10_010.fcs	stable_HEK293_PAClight1_10	stable_HEK293_PAClight1	10	300	2448.12
HEK293_PACight1_PACAP38_A10_A10_010.fcs	HEK293_PACight1_PACAP38_A10_A10_010.fcs	stable_HEK293_PAClight1_10	stable_HEK293_PAClight1	10	300	5566.92
HEK293_PACight1_PACAP38_A10_A10_010.fcs	HEK293_PACight1_PACAP38_A10_A10_010.fcs	stable_HEK293_PAClight1_10	stable_HEK293_PAClight1	10	300	2488.14
HEK293_PACight1_PACAP38_A10_A10_010.fcs	HEK293_PACight1_PACAP38_A10_A10_010.fcs	stable_HEK293_PAClight1_10	stable_HEK293_PAClight1	10	300	4414.62
HEK293_PACight1_PACAP38_A10_A10_010.fcs	HEK293_PACight1_PACAP38_A10_A10_010.fcs	stable_HEK293_PAClight1_10	stable_HEK293_PAClight1	10	300	2608.2
HEK293_PACight1_PACAP38_A10_A10_010.fcs	HEK293_PACight1_PACAP38_A10_A10_010.fcs	stable_HEK293_PAClight1_10	stable_HEK293_PAClight1	10	300	5096.34
HEK293_PACight1_PACAP38_A10_A10_010.fcs	HEK293_PACight1_PACAP38_A10_A10_010.fcs	stable_HEK293_PAClight1_10	stable_HEK293_PAClight1	10	300	4632.66
HEK293_PACight1_PACAP38_A10_A10_010.fcs	HEK293_PACight1_PACAP38_A10_A10_010.fcs	stable_HEK293_PAClight1_10	stable_HEK293_PAClight1	10	300	5624.88
HEK293_PACight1_PACAP38_A10_A10_010.fcs	HEK293_PACight1_PACAP38_A10_A10_010.fcs	stable_HEK293_PAClight1_10	stable_HEK293_PAClight1	10	300	3880.56
HEK293_PACight1_PACAP38_A10_A10_010.fcs	HEK293_PACight1_PACAP38_A10_A10_010.fcs	stable_HEK293_PAClight1_10	stable_HEK293_PAClight1	10	300	4215.9
HEK293_PACight1_PACAP38_A10_A10_010.fcs	HEK293_PACight1_PACAP38_A10_A10_010.fcs	stable_HEK293_PAClight1_10	stable_HEK293_PAClight1	10	300	4451.88
HEK293_PACight1_PACAP38_A10_A10_010.fcs	HEK293_PACight1_PACAP38_A10_A10_010.fcs	stable_HEK293_PAClight1_10	stable_HEK293_PAClight1	10	300	775.56
HEK293_PACight1_PACAP38_A10_A10_010.fcs	HEK293_PACight1_PACAP38_A10_A10_010.fcs	stable_HEK293_PAClight1_10	stable_HEK293_PAClight1	10	300	7704.54
HEK293_PACight1_PACAP38_A10_A10_010.fcs	HEK293_PACight1_PACAP38_A10_A10_010.fcs	stable_HEK293_PAClight1_10	stable_HEK293_PAClight1	10	300	4068.24
HEK293_PACight1_PACAP38_A10_A10_010.fcs	HEK293_PACight1_PACAP38_A10_A10_010.fcs	stable_HEK293_PAClight1_10	stable_HEK293_PAClight1	10	300	6136.86
HEK293_PACight1_PACAP38_A10_A10_010.fcs	HEK293_PACight1_PACAP38_A10_A10_010.fcs	stable_HEK293_PAClight1_10	stable_HEK293_PAClight1	10	300	4944.54
HEK293_PACight1_PACAP38_A10_A10_010.fcs	HEK293_PACight1_PACAP38_A10_A10_010.fcs	stable_HEK293_PAClight1_10	stable_HEK293_PAClight1	10	300	4157.94
HEK293_PACight1_PACAP38_A10_A10_010.fcs	HEK293_PACight1_PACAP38_A10_A10_010.fcs	stable_HEK293_PAClight1_10	stable_HEK293_PAClight1	10	300	1447.62
HEK293_PACight1_PACAP38_A10_A10_010.fcs	HEK293_PACight1_PACAP38_A10_A10_010.fcs	stable_HEK293_PAClight1_10	stable_HEK293_PAClight1	10	300	7055.94
HEK293_PACight1_PACAP38_A10_A10_010.fcs	HEK293_PACight1_PACAP38_A10_A10_010.fcs	stable_HEK293_PAClight1_10	stable_HEK293_PAClight1	10	300	5112.9
HEK293_PACight1_PACAP38_A10_A10_010.fcs	HEK293_PACight1_PACAP38_A10_A10_010.fcs	stable_HEK293_PAClight1_10	stable_HEK293_PAClight1	10	300	6378.36
HEK293_PACight1_PACAP38_A10_A10_010.fcs	HEK293_PACight1_PACAP38_A10_A10_010.fcs	stable_HEK293_PAClight1_10	stable_HEK293_PAClight1	10	300	6607.44
HEK293_PACight1_PACAP38_A10_A10_010.fcs	HEK293_PACight1_PACAP38_A10_A10_010.fcs	stable_HEK293_PAClight1_10	stable_HEK293_PAClight1	10	300	2891.1
HEK293_PACight1_PACAP38_A10_A10_010.fcs	HEK293_PACight1_PACAP38_A10_A10_010.fcs	stable_HEK293_PAClight1_10	stable_HEK293_PAClight1	10	300	2216.28
HEK293_PACight1_PACAP38_A10_A10_010.fcs	HEK293_PACight1_PACAP38_A10_A10_010.fcs	stable_HEK293_PAClight1_10	stable_HEK293_PAClight1	10	300	22042.7
HEK293_PACight1_PACAP38_A10_A10_010.fcs	HEK293_PACight1_PACAP38_A10_A10_010.fcs	stable_HEK293_PAClight1_10	stable_HEK293_PAClight1	10	300	6784.08
HEK293_PACight1_PACAP38_A10_A10_010.fcs	HEK293_PACight1_PACAP38_A10_A10_010.fcs	stable_HEK293_PAClight1_10	stable_HEK293_PAClight1	10	300	3385.14
HEK293_PACight1_PACAP38_A10_A10_010.fcs	HEK293_PACight1_PACAP38_A10_A10_010.fcs	stable_HEK293_PAClight1_10	stable_HEK293_PAClight1	10	300	2655.12
HEK293_PACight1_PACAP38_A10_A10_010.fcs	HEK293_PACight1_PACAP38_A10_A10_010.fcs	stable_HEK293_PAClight1_10	stable_HEK293_PAClight1	10	300	2274.24
HEK293_PACight1_PACAP38_A10_A10_010.fcs	HEK293_PACight1_PACAP38_A10_A10_010.fcs	stable_HEK293_PAClight1_10	stable_HEK293_PAClight1	10	300	1317.9
HEK293_PACight1_PACAP38_A10_A10_010.fcs	HEK293_PACight1_PACAP38_A10_A10_010.fcs	stable_HEK293_PAClight1_10	stable_HEK293_PAClight1	10	300	5205.36
HEK293_PACight1_PACAP38_A10_A10_010.fcs	HEK293_PACight1_PACAP38_A10_A10_010.fcs	stable_HEK293_PAClight1_10	stable_HEK293_PAClight1	10	300	3774.3
HEK293_PACight1_PACAP38_A10_A10_010.fcs	HEK293_PACight1_PACAP38_A10_A10_010.fcs	stable_HEK293_PAClight1_10	stable_HEK293_PAClight1	10	300	3459.66
HEK293_PACight1_PACAP38_A10_A10_010.fcs	HEK293_PACight1_PACAP38_A10_A10_010.fcs	stable_HEK293_PAClight1_10	stable_HEK293_PAClight1	10	300	7286.4
HEK293_PACight1_PACAP38_A10_A10_010.fcs	HEK293_PACight1_PACAP38_A10_A10_010.fcs	stable_HEK293_PAClight1_10	stable_HEK293_PAClight1	10	300	5230.2
HEK293_PACight1_PACAP38_A10_A10_010.fcs	HEK293_PACight1_PACAP38_A10_A10_010.fcs	stable_HEK293_PAClight1_10	stable_HEK293_PAClight1	10	300	4193.82
HEK293_PACight1_PACAP38_A10_A10_010.fcs	HEK293_PACight1_PACAP38_A10_A10_010.fcs	stable_HEK293_PAClight1_10	stable_HEK293_PAClight1	10	300	6187.92
HEK293_PACight1_PACAP38_A10_A10_010.fcs	HEK293_PACight1_PACAP38_A10_A10_010.fcs	stable_HEK293_PAClight1_10	stable_HEK293_PAClight1	10	300	19415.2
HEK293_PACight1_PACAP38_A10_A10_010.fcs	HEK293_PACight1_PACAP38_A10_A10_010.fcs	stable_HEK293_PAClight1_10	stable_HEK293_PAClight1	10	300	2036.88
HEK293_PACight1_PACAP38_A10_A10_010.fcs	HEK293_PACight1_PACAP38_A10_A10_010.fcs	stable_HEK293_PAClight1_10	stable_HEK293_PAClight1	10	300	15422.9
HEK293_PACight1_PACAP38_A10_A10_010.fcs	HEK293_PACight1_PACAP38_A10_A10_010.fcs	stable_HEK293_PAClight1_10	stable_HEK293_PAClight1	10	300	3985.44
HEK293_PACight1_PACAP38_A10_A10_010.fcs	HEK293_PACight1_PACAP38_A10_A10_010.fcs	stable_HEK293_PAClight1_10	stable_HEK293_PAClight1	10	300	14113.3
HEK293_PACight1_PACAP38_A10_A10_010.fcs	HEK293_PACight1_PACAP38_A10_A10_010.fcs	stable_HEK293_PAClight1_10	stable_HEK293_PAClight1	10	300	9381.24
HEK293_PACight1_PACAP38_A10_A10_010.fcs	HEK293_PACight1_PACAP38_A10_A10_010.fcs	stable_HEK293_PAClight1_10	stable_HEK293_PAClight1	10	300	4264.2
HEK293_PACight1_PACAP38_A10_A10_010.fcs	HEK293_PACight1_PACAP38_A10_A10_010.fcs	stable_HEK293_PAClight1_10	stable_HEK293_PAClight1	10	300	4295.94
HEK293_PACight1_PACAP38_A10_A10_010.fcs	HEK293_PACight1_PACAP38_A10_A10_010.fcs	stable_HEK293_PAClight1_10	stable_HEK293_PAClight1	10	300	4137.24
HEK293_PACight1_PACAP38_A10_A10_010.fcs	HEK293_PACight1_PACAP38_A10_A10_010.fcs	stable_HEK293_PAClight1_10	stable_HEK293_PAClight1	10	300	5333.7
HEK293_PACight1_PACAP38_A10_A10_010.fcs	HEK293_PACight1_PACAP38_A10_A10_010.fcs	stable_HEK293_PAClight1_10	stable_HEK293_PAClight1	10	300	21125
HEK293_PACight1_PACAP38_A10_A10_010.fcs	HEK293_PACight1_PACAP38_A10_A10_010.fcs	stable_HEK293_PAClight1_10	stable_HEK293_PAClight1	10	300	1813.32
HEK293_PACight1_PACAP38_A10_A10_010.fcs	HEK293_PACight1_PACAP38_A10_A10_010.fcs	stable_HEK293_PAClight1_10	stable_HEK293_PAClight1	10	300	3644.58
HEK293_PACight1_PACAP38_A10_A10_010.fcs	HEK293_PACight1_PACAP38_A10_A10_010.fcs	stable_HEK293_PAClight1_10	stable_HEK293_PAClight1	10	300	3611.46
HEK293_PACight1_PACAP38_A10_A10_010.fcs	HEK293_PACight1_PACAP38_A10_A10_010.fcs	stable_HEK293_PAClight1_10	stable_HEK293_PAClight1	10	300	211.14
HEK293_PACight1_PACAP38_A10_A10_010.fcs	HEK293_PACight1_PACAP38_A10_A10_010.fcs	stable_HEK293_PAClight1_10	stable_HEK293_PAClight1	10	300	2648.22
HEK293_PACight1_PACAP38_A10_A10_010.fcs	HEK293_PACight1_PACAP38_A10_A10_010.fcs	stable_HEK293_PAClight1_10	stable_HEK293_PAClight1	10	300	892.86
HEK293_PACight1_PACAP38_A10_A10_010.fcs	HEK293_PACight1_PACAP38_A10_A10_010.fcs	stable_HEK293_PAClight1_10	stable_HEK293_PAClight1	10	300	7193.94
HEK293_PACight1_PACAP38_A10_A10_010.fcs	HEK293_PACight1_PACAP38_A10_A10_010.fcs	stable_HEK293_PAClight1_10	stable_HEK293_PAClight1	10	300	8906.52
HEK293_PACight1_PACAP38_A10_A10_010.fcs	HEK293_PACight1_PACAP38_A10_A10_010.fcs	stable_HEK293_PAClight1_10	stable_HEK293_PAClight1	10	300	4192.44
HEK293_PACight1_PACAP38_A10_A10_010.fcs	HEK293_PACight1_PACAP38_A10_A10_010.fcs	stable_HEK293_PAClight1_10	stable_HEK293_PAClight1	10	300	26618.8
HEK293_PACight1_PACAP38_A10_A10_010.fcs	HEK293_PACight1_PACAP38_A10_A10_010.fcs	stable_HEK293_PAClight1_10	stable_HEK293_PAClight1	10	300	4218.66
HEK293_PACight1_PACAP38_A10_A10_010.fcs	HEK293_PACight1_PACAP38_A10_A10_010.fcs	stable_HEK293_PAClight1_10	stable_HEK293_PAClight1	10	300	4424.28
HEK293_PACight1_PACAP38_A10_A10_010.fcs	HEK293_PACight1_PACAP38_A10_A10_010.fcs	stable_HEK293_PAClight1_10	stable_HEK293_PAClight1	10	300	492.66
HEK293_PACight1_PACAP38_A10_A10_010.fcs	HEK293_PACight1_PACAP38_A10_A10_010.fcs	stable_HEK293_PAClight1_10	stable_HEK293_PAClight1	10	300	1570.44
HEK293_PACight1_PACAP38_A10_A10_010.fcs	HEK293_PACight1_PACAP38_A10_A10_010.fcs	stable_HEK293_PAClight1_10	stable_HEK293_PAClight1	10	300	1604.94
HEK293_PACight1_PACAP38_A10_A10_010.fcs	HEK293_PACight1_PACAP38_A10_A10_010.fcs	stable_HEK293_PAClight1_10	stable_HEK293_PAClight1	10	300	248.4
HEK293_PACight1_PACAP38_A10_A10_010.fcs	HEK293_PACight1_PACAP38_A10_A10_010.fcs	stable_HEK293_PAClight1_10	stable_HEK293_PAClight1	10	300	3753.6
HEK293_PACight1_PACAP38_A10_A10_010.fcs	HEK293_PACight1_PACAP38_A10_A10_010.fcs	stable_HEK293_PAClight1_10	stable_HEK293_PAClight1	10	300	7794.24
HEK293_PACight1_PACAP38_A10_A10_010.fcs	HEK293_PACight1_PACAP38_A10_A10_010.fcs	stable_HEK293_PAClight1_10	stable_HEK293_PAClight1	10	300	8266.2
HEK293_PACight1_PACAP38_A10_A10_010.fcs	HEK293_PACight1_PACAP38_A10_A10_010.fcs	stable_HEK293_PAClight1_10	stable_HEK293_PAClight1	10	300	426.42
HEK293_PACight1_PACAP38_A10_A10_010.fcs	HEK293_PACight1_PACAP38_A10_A10_010.fcs	stable_HEK293_PAClight1_10	stable_HEK293_PAClight1	10	300	3316.14
HEK293_PACight1_PACAP38_A10_A10_010.fcs	HEK293_PACight1_PACAP38_A10_A10_010.fcs	stable_HEK293_PAClight1_10	stable_HEK293_PAClight1	10	300	491.28
HEK293_PACight1_PACAP38_A10_A10_010.fcs	HEK293_PACight1_PACAP38_A10_A10_010.fcs	stable_HEK293_PAClight1_10	stable_HEK293_PAClight1	10	300	113.16
HEK293_PACight1_PACAP38_A10_A10_010.fcs	HEK293_PACight1_PACAP38_A10_A10_010.fcs	stable_HEK293_PAClight1_10	stable_HEK293_PAClight1	10	300	3737.04
HEK293_PACight1_PACAP38_A10_A10_010.fcs	HEK293_PACight1_PACAP38_A10_A10_010.fcs	stable_HEK293_PAClight1_10	stable_HEK293_PAClight1	10	300	5721.48
HEK293_PACight1_PACAP38_A10_A10_010.fcs	HEK293_PACight1_PACAP38_A10_A10_010.fcs	stable_HEK293_PAClight1_10	stable_HEK293_PAClight1	10	300	339.48
HEK293_PACight1_PACAP38_A10_A10_010.fcs	HEK293_PACight1_PACAP38_A10_A10_010.fcs	stable_HEK293_PAClight1_10	stable_HEK293_PAClight1	10	300	4028.22
HEK293_PACight1_PACAP38_A10_A10_010.fcs	HEK293_PACight1_PACAP38_A10_A10_010.fcs	stable_HEK293_PAClight1_10	stable_HEK293_PAClight1	10	300	3048.42
HEK293_PACight1_PACAP38_A10_A10_010.fcs	HEK293_PACight1_PACAP38_A10_A10_010.fcs	stable_HEK293_PAClight1_10	stable_HEK293_PAClight1	10	300	69
HEK293_PACight1_PACAP38_A10_A10_010.fcs	HEK293_PACight1_PACAP38_A10_A10_010.fcs	stable_HEK293_PAClight1_10	stable_HEK293_PAClight1	10	300	3129.84
HEK293_PACight1_PACAP38_A10_A10_010.fcs	HEK293_PACight1_PACAP38_A10_A10_010.fcs	stable_HEK293_PAClight1_10	stable_HEK293_PAClight1	10	300	805.92
HEK293_PACight1_PACAP38_A10_A10_010.fcs	HEK293_PACight1_PACAP38_A10_A10_010.fcs	stable_HEK293_PAClight1_10	stable_HEK293_PAClight1	10	300	442.98
HEK293_PACight1_PACAP38_A10_A10_010.fcs	HEK293_PACight1_PACAP38_A10_A10_010.fcs	stable_HEK293_PAClight1_10	stable_HEK293_PAClight1	10	300	320.16
HEK293_PACight1_PACAP38_A10_A10_010.fcs	HEK293_PACight1_PACAP38_A10_A10_010.fcs	stable_HEK293_PAClight1_10	stable_HEK293_PAClight1	10	300	3194.7
HEK293_PACight1_PACAP38_A10_A10_010.fcs	HEK293_PACight1_PACAP38_A10_A10_010.fcs	stable_HEK293_PAClight1_10	stable_HEK293_PAClight1	10	300	2848.32
HEK293_PACight1_PACAP38_A10_A10_010.fcs	HEK293_PACight1_PACAP38_A10_A10_010.fcs	stable_HEK293_PAClight1_10	stable_HEK293_PAClight1	10	300	4621.62
HEK293_PACight1_PACAP38_A10_A10_010.fcs	HEK293_PACight1_PACAP38_A10_A10_010.fcs	stable_HEK293_PAClight1_10	stable_HEK293_PAClight1	10	300	1004.64
HEK293_PACight1_PACAP38_A10_A10_010.fcs	HEK293_PACight1_PACAP38_A10_A10_010.fcs	stable_HEK293_PAClight1_10	stable_HEK293_PAClight1	10	300	5209.5
HEK293_PACight1_PACAP38_A10_A10_010.fcs	HEK293_PACight1_PACAP38_A10_A10_010.fcs	stable_HEK293_PAClight1_10	stable_HEK293_PAClight1	10	300	1751.22
HEK293_PACight1_PACAP38_A10_A10_010.fcs	HEK293_PACight1_PACAP38_A10_A10_010.fcs	stable_HEK293_PAClight1_10	stable_HEK293_PAClight1	10	300	3706.68
HEK293_PACight1_PACAP38_A10_A10_010.fcs	HEK293_PACight1_PACAP38_A10_A10_010.fcs	stable_HEK293_PAClight1_10	stable_HEK293_PAClight1	10	300	6131.34
HEK293_PACight1_PACAP38_A10_A10_010.fcs	HEK293_PACight1_PACAP38_A10_A10_010.fcs	stable_HEK293_PAClight1_10	stable_HEK293_PAClight1	10	300	2245.26
HEK293_PACight1_PACAP38_A10_A10_010.fcs	HEK293_PACight1_PACAP38_A10_A10_010.fcs	stable_HEK293_PAClight1_10	stable_HEK293_PAClight1	10	300	3306.48
HEK293_PACight1_PACAP38_A10_A10_010.fcs	HEK293_PACight1_PACAP38_A10_A10_010.fcs	stable_HEK293_PAClight1_10	stable_HEK293_PAClight1	10	300	5876.04
HEK293_PACight1_PACAP38_A10_A10_010.fcs	HEK293_PACight1_PACAP38_A10_A10_010.fcs	stable_HEK293_PAClight1_10	stable_HEK293_PAClight1	10	300	9372.96
HEK293_PACight1_PACAP38_A10_A10_010.fcs	HEK293_PACight1_PACAP38_A10_A10_010.fcs	stable_HEK293_PAClight1_10	stable_HEK293_PAClight1	10	300	6320.4
HEK293_PACight1_PACAP38_A10_A10_010.fcs	HEK293_PACight1_PACAP38_A10_A10_010.fcs	stable_HEK293_PAClight1_10	stable_HEK293_PAClight1	10	300	2163.84
HEK293_PACight1_PACAP38_A10_A10_010.fcs	HEK293_PACight1_PACAP38_A10_A10_010.fcs	stable_HEK293_PAClight1_10	stable_HEK293_PAClight1	10	300	4697.52
HEK293_PACight1_PACAP38_A10_A10_010.fcs	HEK293_PACight1_PACAP38_A10_A10_010.fcs	stable_HEK293_PAClight1_10	stable_HEK293_PAClight1	10	300	36238.8
HEK293_PACight1_PACAP38_A10_A10_010.fcs	HEK293_PACight1_PACAP38_A10_A10_010.fcs	stable_HEK293_PAClight1_10	stable_HEK293_PAClight1	10	300	3374.1
HEK293_PACight1_PACAP38_A10_A10_010.fcs	HEK293_PACight1_PACAP38_A10_A10_010.fcs	stable_HEK293_PAClight1_10	stable_HEK293_PAClight1	10	300	1991.34
HEK293_PACight1_PACAP38_A10_A10_010.fcs	HEK293_PACight1_PACAP38_A10_A10_010.fcs	stable_HEK293_PAClight1_10	stable_HEK293_PAClight1	10	300	2438.46
HEK293_PACight1_PACAP38_A10_A10_010.fcs	HEK293_PACight1_PACAP38_A10_A10_010.fcs	stable_HEK293_PAClight1_10	stable_HEK293_PAClight1	10	300	721.74
HEK293_PACight1_PACAP38_A10_A10_010.fcs	HEK293_PACight1_PACAP38_A10_A10_010.fcs	stable_HEK293_PAClight1_10	stable_HEK293_PAClight1	10	300	3594.9
HEK293_PACight1_PACAP38_A10_A10_010.fcs	HEK293_PACight1_PACAP38_A10_A10_010.fcs	stable_HEK293_PAClight1_10	stable_HEK293_PAClight1	10	300	5681.46
HEK293_PACight1_PACAP38_A10_A10_010.fcs	HEK293_PACight1_PACAP38_A10_A10_010.fcs	stable_HEK293_PAClight1_10	stable_HEK293_PAClight1	10	300	5205.36
HEK293_PACight1_PACAP38_A10_A10_010.fcs	HEK293_PACight1_PACAP38_A10_A10_010.fcs	stable_HEK293_PAClight1_10	stable_HEK293_PAClight1	10	300	5568.3
HEK293_PACight1_PACAP38_A10_A10_010.fcs	HEK293_PACight1_PACAP38_A10_A10_010.fcs	stable_HEK293_PAClight1_10	stable_HEK293_PAClight1	10	300	5162.58
HEK293_PACight1_PACAP38_A10_A10_010.fcs	HEK293_PACight1_PACAP38_A10_A10_010.fcs	stable_HEK293_PAClight1_10	stable_HEK293_PAClight1	10	300	4388.4
HEK293_PACight1_PACAP38_A10_A10_010.fcs	HEK293_PACight1_PACAP38_A10_A10_010.fcs	stable_HEK293_PAClight1_10	stable_HEK293_PAClight1	10	300	6117.54
HEK293_PACight1_PACAP38_A10_A10_010.fcs	HEK293_PACight1_PACAP38_A10_A10_010.fcs	stable_HEK293_PAClight1_10	stable_HEK293_PAClight1	10	300	13441.2
HEK293_PACight1_PACAP38_A10_A10_010.fcs	HEK293_PACight1_PACAP38_A10_A10_010.fcs	stable_HEK293_PAClight1_10	stable_HEK293_PAClight1	10	300	208.38
HEK293_PACight1_PACAP38_A10_A10_010.fcs	HEK293_PACight1_PACAP38_A10_A10_010.fcs	stable_HEK293_PAClight1_10	stable_HEK293_PAClight1	10	300	9163.2
HEK293_PACight1_PACAP38_A10_A10_010.fcs	HEK293_PACight1_PACAP38_A10_A10_010.fcs	stable_HEK293_PAClight1_10	stable_HEK293_PAClight1	10	300	7391.28
HEK293_PACight1_PACAP38_A10_A10_010.fcs	HEK293_PACight1_PACAP38_A10_A10_010.fcs	stable_HEK293_PAClight1_10	stable_HEK293_PAClight1	10	300	2060.34
HEK293_PACight1_PACAP38_A10_A10_010.fcs	HEK293_PACight1_PACAP38_A10_A10_010.fcs	stable_HEK293_PAClight1_10	stable_HEK293_PAClight1	10	300	4613.34
HEK293_PACight1_PACAP38_A10_A10_010.fcs	HEK293_PACight1_PACAP38_A10_A10_010.fcs	stable_HEK293_PAClight1_10	stable_HEK293_PAClight1	10	300	11828
HEK293_PACight1_PACAP38_A10_A10_010.fcs	HEK293_PACight1_PACAP38_A10_A10_010.fcs	stable_HEK293_PAClight1_10	stable_HEK293_PAClight1	10	300	1177.14
HEK293_PACight1_PACAP38_A10_A10_010.fcs	HEK293_PACight1_PACAP38_A10_A10_010.fcs	stable_HEK293_PAClight1_10	stable_HEK293_PAClight1	10	300	2170.74
HEK293_PACight1_PACAP38_A10_A10_010.fcs	HEK293_PACight1_PACAP38_A10_A10_010.fcs	stable_HEK293_PAClight1_10	stable_HEK293_PAClight1	10	300	1613.22
HEK293_PACight1_PACAP38_A10_A10_010.fcs	HEK293_PACight1_PACAP38_A10_A10_010.fcs	stable_HEK293_PAClight1_10	stable_HEK293_PAClight1	10	300	8137.86
HEK293_PACight1_PACAP38_A10_A10_010.fcs	HEK293_PACight1_PACAP38_A10_A10_010.fcs	stable_HEK293_PAClight1_10	stable_HEK293_PAClight1	10	300	4191.06
HEK293_PACight1_PACAP38_A10_A10_010.fcs	HEK293_PACight1_PACAP38_A10_A10_010.fcs	stable_HEK293_PAClight1_10	stable_HEK293_PAClight1	10	300	2292.18
HEK293_PACight1_PACAP38_A10_A10_010.fcs	HEK293_PACight1_PACAP38_A10_A10_010.fcs	stable_HEK293_PAClight1_10	stable_HEK293_PAClight1	10	300	4131.72
HEK293_PACight1_PACAP38_A10_A10_010.fcs	HEK293_PACight1_PACAP38_A10_A10_010.fcs	stable_HEK293_PAClight1_10	stable_HEK293_PAClight1	10	300	3165.72
HEK293_PACight1_PACAP38_A10_A10_010.fcs	HEK293_PACight1_PACAP38_A10_A10_010.fcs	stable_HEK293_PAClight1_10	stable_HEK293_PAClight1	10	300	3626.64
HEK293_PACight1_PACAP38_A10_A10_010.fcs	HEK293_PACight1_PACAP38_A10_A10_010.fcs	stable_HEK293_PAClight1_10	stable_HEK293_PAClight1	10	300	3125.7
HEK293_PACight1_PACAP38_A10_A10_010.fcs	HEK293_PACight1_PACAP38_A10_A10_010.fcs	stable_HEK293_PAClight1_10	stable_HEK293_PAClight1	10	300	7022.82
HEK293_PACight1_PACAP38_A10_A10_010.fcs	HEK293_PACight1_PACAP38_A10_A10_010.fcs	stable_HEK293_PAClight1_10	stable_HEK293_PAClight1	10	300	4798.26
HEK293_PACight1_PACAP38_A10_A10_010.fcs	HEK293_PACight1_PACAP38_A10_A10_010.fcs	stable_HEK293_PAClight1_10	stable_HEK293_PAClight1	10	300	7588.62
HEK293_PACight1_PACAP38_A10_A10_010.fcs	HEK293_PACight1_PACAP38_A10_A10_010.fcs	stable_HEK293_PAClight1_10	stable_HEK293_PAClight1	10	300	5558.64
HEK293_PACight1_PACAP38_A10_A10_010.fcs	HEK293_PACight1_PACAP38_A10_A10_010.fcs	stable_HEK293_PAClight1_10	stable_HEK293_PAClight1	10	300	6862.74
HEK293_PACight1_PACAP38_A10_A10_010.fcs	HEK293_PACight1_PACAP38_A10_A10_010.fcs	stable_HEK293_PAClight1_10	stable_HEK293_PAClight1	10	300	5557.26
HEK293_PACight1_PACAP38_A10_A10_010.fcs	HEK293_PACight1_PACAP38_A10_A10_010.fcs	stable_HEK293_PAClight1_10	stable_HEK293_PAClight1	10	300	6880.68
HEK293_PACight1_PACAP38_A10_A10_010.fcs	HEK293_PACight1_PACAP38_A10_A10_010.fcs	stable_HEK293_PAClight1_10	stable_HEK293_PAClight1	10	300	3898.5
HEK293_PACight1_PACAP38_A10_A10_010.fcs	HEK293_PACight1_PACAP38_A10_A10_010.fcs	stable_HEK293_PAClight1_10	stable_HEK293_PAClight1	10	300	5862.24
HEK293_PACight1_PACAP38_A10_A10_010.fcs	HEK293_PACight1_PACAP38_A10_A10_010.fcs	stable_HEK293_PAClight1_10	stable_HEK293_PAClight1	10	300	2154.18
HEK293_PACight1_PACAP38_A10_A10_010.fcs	HEK293_PACight1_PACAP38_A10_A10_010.fcs	stable_HEK293_PAClight1_10	stable_HEK293_PAClight1	10	300	1508.34
HEK293_PACight1_PACAP38_A10_A10_010.fcs	HEK293_PACight1_PACAP38_A10_A10_010.fcs	stable_HEK293_PAClight1_10	stable_HEK293_PAClight1	10	300	3970.26
HEK293_PACight1_PACAP38_A10_A10_010.fcs	HEK293_PACight1_PACAP38_A10_A10_010.fcs	stable_HEK293_PAClight1_10	stable_HEK293_PAClight1	10	300	1319.28
HEK293_PACight1_PACAP38_A10_A10_010.fcs	HEK293_PACight1_PACAP38_A10_A10_010.fcs	stable_HEK293_PAClight1_10	stable_HEK293_PAClight1	10	300	6492.9
HEK293_PACight1_PACAP38_A10_A10_010.fcs	HEK293_PACight1_PACAP38_A10_A10_010.fcs	stable_HEK293_PAClight1_10	stable_HEK293_PAClight1	10	300	4685.1
HEK293_PACight1_PACAP38_A10_A10_010.fcs	HEK293_PACight1_PACAP38_A10_A10_010.fcs	stable_HEK293_PAClight1_10	stable_HEK293_PAClight1	10	300	641.7
HEK293_PACight1_PACAP38_A10_A10_010.fcs	HEK293_PACight1_PACAP38_A10_A10_010.fcs	stable_HEK293_PAClight1_10	stable_HEK293_PAClight1	10	300	5738.04
HEK293_PACight1_PACAP38_A10_A10_010.fcs	HEK293_PACight1_PACAP38_A10_A10_010.fcs	stable_HEK293_PAClight1_10	stable_HEK293_PAClight1	10	300	1994.1
HEK293_PACight1_PACAP38_A10_A10_010.fcs	HEK293_PACight1_PACAP38_A10_A10_010.fcs	stable_HEK293_PAClight1_10	stable_HEK293_PAClight1	10	300	9004.5
HEK293_PACight1_PACAP38_A10_A10_010.fcs	HEK293_PACight1_PACAP38_A10_A10_010.fcs	stable_HEK293_PAClight1_10	stable_HEK293_PAClight1	10	300	-33.12
HEK293_PACight1_PACAP38_A10_A10_010.fcs	HEK293_PACight1_PACAP38_A10_A10_010.fcs	stable_HEK293_PAClight1_10	stable_HEK293_PAClight1	10	300	5584.86
HEK293_PACight1_PACAP38_A10_A10_010.fcs	HEK293_PACight1_PACAP38_A10_A10_010.fcs	stable_HEK293_PAClight1_10	stable_HEK293_PAClight1	10	300	7135.98
HEK293_PACight1_PACAP38_A10_A10_010.fcs	HEK293_PACight1_PACAP38_A10_A10_010.fcs	stable_HEK293_PAClight1_10	stable_HEK293_PAClight1	10	300	5387.52
HEK293_PACight1_PACAP38_A10_A10_010.fcs	HEK293_PACight1_PACAP38_A10_A10_010.fcs	stable_HEK293_PAClight1_10	stable_HEK293_PAClight1	10	300	3187.8
HEK293_PACight1_PACAP38_A10_A10_010.fcs	HEK293_PACight1_PACAP38_A10_A10_010.fcs	stable_HEK293_PAClight1_10	stable_HEK293_PAClight1	10	300	2548.86
HEK293_PACight1_PACAP38_A10_A10_010.fcs	HEK293_PACight1_PACAP38_A10_A10_010.fcs	stable_HEK293_PAClight1_10	stable_HEK293_PAClight1	10	300	7075.26
HEK293_PACight1_PACAP38_A10_A10_010.fcs	HEK293_PACight1_PACAP38_A10_A10_010.fcs	stable_HEK293_PAClight1_10	stable_HEK293_PAClight1	10	300	7493.4
HEK293_PACight1_PACAP38_A10_A10_010.fcs	HEK293_PACight1_PACAP38_A10_A10_010.fcs	stable_HEK293_PAClight1_10	stable_HEK293_PAClight1	10	300	2942.16
HEK293_PACight1_PACAP38_A10_A10_010.fcs	HEK293_PACight1_PACAP38_A10_A10_010.fcs	stable_HEK293_PAClight1_10	stable_HEK293_PAClight1	10	300	4887.96
HEK293_PACight1_PACAP38_A10_A10_010.fcs	HEK293_PACight1_PACAP38_A10_A10_010.fcs	stable_HEK293_PAClight1_10	stable_HEK293_PAClight1	10	300	11768.6
HEK293_PACight1_PACAP38_A10_A10_010.fcs	HEK293_PACight1_PACAP38_A10_A10_010.fcs	stable_HEK293_PAClight1_10	stable_HEK293_PAClight1	10	300	3840.54
HEK293_PACight1_PACAP38_A10_A10_010.fcs	HEK293_PACight1_PACAP38_A10_A10_010.fcs	stable_HEK293_PAClight1_10	stable_HEK293_PAClight1	10	300	5123.94
HEK293_PACight1_PACAP38_A10_A10_010.fcs	HEK293_PACight1_PACAP38_A10_A10_010.fcs	stable_HEK293_PAClight1_10	stable_HEK293_PAClight1	10	300	4053.06
HEK293_PACight1_PACAP38_A10_A10_010.fcs	HEK293_PACight1_PACAP38_A10_A10_010.fcs	stable_HEK293_PAClight1_10	stable_HEK293_PAClight1	10	300	1389.66
HEK293_PACight1_PACAP38_A10_A10_010.fcs	HEK293_PACight1_PACAP38_A10_A10_010.fcs	stable_HEK293_PAClight1_10	stable_HEK293_PAClight1	10	300	5163.96
HEK293_PACight1_PACAP38_A10_A10_010.fcs	HEK293_PACight1_PACAP38_A10_A10_010.fcs	stable_HEK293_PAClight1_10	stable_HEK293_PAClight1	10	300	1915.44
HEK293_PACight1_PACAP38_A10_A10_010.fcs	HEK293_PACight1_PACAP38_A10_A10_010.fcs	stable_HEK293_PAClight1_10	stable_HEK293_PAClight1	10	300	253.92
HEK293_PACight1_PACAP38_A10_A10_010.fcs	HEK293_PACight1_PACAP38_A10_A10_010.fcs	stable_HEK293_PAClight1_10	stable_HEK293_PAClight1	10	300	125.58
HEK293_PACight1_PACAP38_A10_A10_010.fcs	HEK293_PACight1_PACAP38_A10_A10_010.fcs	stable_HEK293_PAClight1_10	stable_HEK293_PAClight1	10	300	5382
HEK293_PACight1_PACAP38_A10_A10_010.fcs	HEK293_PACight1_PACAP38_A10_A10_010.fcs	stable_HEK293_PAClight1_10	stable_HEK293_PAClight1	10	300	8042.64
HEK293_PACight1_PACAP38_A10_A10_010.fcs	HEK293_PACight1_PACAP38_A10_A10_010.fcs	stable_HEK293_PAClight1_10	stable_HEK293_PAClight1	10	300	3570.06
HEK293_PACight1_PACAP38_A10_A10_010.fcs	HEK293_PACight1_PACAP38_A10_A10_010.fcs	stable_HEK293_PAClight1_10	stable_HEK293_PAClight1	10	300	3240.24
HEK293_PACight1_PACAP38_A10_A10_010.fcs	HEK293_PACight1_PACAP38_A10_A10_010.fcs	stable_HEK293_PAClight1_10	stable_HEK293_PAClight1	10	300	2212.14
HEK293_PACight1_PACAP38_A10_A10_010.fcs	HEK293_PACight1_PACAP38_A10_A10_010.fcs	stable_HEK293_PAClight1_10	stable_HEK293_PAClight1	10	300	3979.92
HEK293_PACight1_PACAP38_A10_A10_010.fcs	HEK293_PACight1_PACAP38_A10_A10_010.fcs	stable_HEK293_PAClight1_10	stable_HEK293_PAClight1	10	300	4835.52
HEK293_PACight1_PACAP38_A10_A10_010.fcs	HEK293_PACight1_PACAP38_A10_A10_010.fcs	stable_HEK293_PAClight1_10	stable_HEK293_PAClight1	10	300	2173.5
HEK293_PACight1_PACAP38_A10_A10_010.fcs	HEK293_PACight1_PACAP38_A10_A10_010.fcs	stable_HEK293_PAClight1_10	stable_HEK293_PAClight1	10	300	2849.7
HEK293_PACight1_PACAP38_A10_A10_010.fcs	HEK293_PACight1_PACAP38_A10_A10_010.fcs	stable_HEK293_PAClight1_10	stable_HEK293_PAClight1	10	300	3215.4
HEK293_PACight1_PACAP38_A10_A10_010.fcs	HEK293_PACight1_PACAP38_A10_A10_010.fcs	stable_HEK293_PAClight1_10	stable_HEK293_PAClight1	10	300	3774.3
HEK293_PACight1_PACAP38_A10_A10_010.fcs	HEK293_PACight1_PACAP38_A10_A10_010.fcs	stable_HEK293_PAClight1_10	stable_HEK293_PAClight1	10	300	4217.28
HEK293_PACight1_PACAP38_A10_A10_010.fcs	HEK293_PACight1_PACAP38_A10_A10_010.fcs	stable_HEK293_PAClight1_10	stable_HEK293_PAClight1	10	300	4515.36
HEK293_PACight1_PACAP38_A10_A10_010.fcs	HEK293_PACight1_PACAP38_A10_A10_010.fcs	stable_HEK293_PAClight1_10	stable_HEK293_PAClight1	10	300	4429.8
HEK293_PACight1_PACAP38_A10_A10_010.fcs	HEK293_PACight1_PACAP38_A10_A10_010.fcs	stable_HEK293_PAClight1_10	stable_HEK293_PAClight1	10	300	3088.44
HEK293_PACight1_PACAP38_A10_A10_010.fcs	HEK293_PACight1_PACAP38_A10_A10_010.fcs	stable_HEK293_PAClight1_10	stable_HEK293_PAClight1	10	300	9854.58
HEK293_PACight1_PACAP38_A10_A10_010.fcs	HEK293_PACight1_PACAP38_A10_A10_010.fcs	stable_HEK293_PAClight1_10	stable_HEK293_PAClight1	10	300	2333.58
HEK293_PACight1_PACAP38_A10_A10_010.fcs	HEK293_PACight1_PACAP38_A10_A10_010.fcs	stable_HEK293_PAClight1_10	stable_HEK293_PAClight1	10	300	7795.62
HEK293_PACight1_PACAP38_A10_A10_010.fcs	HEK293_PACight1_PACAP38_A10_A10_010.fcs	stable_HEK293_PAClight1_10	stable_HEK293_PAClight1	10	300	4116.54
HEK293_PACight1_PACAP38_A10_A10_010.fcs	HEK293_PACight1_PACAP38_A10_A10_010.fcs	stable_HEK293_PAClight1_10	stable_HEK293_PAClight1	10	300	4013.04
HEK293_PACight1_PACAP38_A10_A10_010.fcs	HEK293_PACight1_PACAP38_A10_A10_010.fcs	stable_HEK293_PAClight1_10	stable_HEK293_PAClight1	10	300	4838.28
HEK293_PACight1_PACAP38_A10_A10_010.fcs	HEK293_PACight1_PACAP38_A10_A10_010.fcs	stable_HEK293_PAClight1_10	stable_HEK293_PAClight1	10	300	55240
HEK293_PACight1_PACAP38_A10_A10_010.fcs	HEK293_PACight1_PACAP38_A10_A10_010.fcs	stable_HEK293_PAClight1_10	stable_HEK293_PAClight1	10	300	8907.9
HEK293_PACight1_PACAP38_A10_A10_010.fcs	HEK293_PACight1_PACAP38_A10_A10_010.fcs	stable_HEK293_PAClight1_10	stable_HEK293_PAClight1	10	300	3608.7
HEK293_PACight1_PACAP38_A10_A10_010.fcs	HEK293_PACight1_PACAP38_A10_A10_010.fcs	stable_HEK293_PAClight1_10	stable_HEK293_PAClight1	10	300	8938.26
HEK293_PACight1_PACAP38_A10_A10_010.fcs	HEK293_PACight1_PACAP38_A10_A10_010.fcs	stable_HEK293_PAClight1_10	stable_HEK293_PAClight1	10	300	2351.52
HEK293_PACight1_PACAP38_A10_A10_010.fcs	HEK293_PACight1_PACAP38_A10_A10_010.fcs	stable_HEK293_PAClight1_10	stable_HEK293_PAClight1	10	300	4754.1
HEK293_PACight1_PACAP38_A10_A10_010.fcs	HEK293_PACight1_PACAP38_A10_A10_010.fcs	stable_HEK293_PAClight1_10	stable_HEK293_PAClight1	10	300	20422.6
HEK293_PACight1_PACAP38_A10_A10_010.fcs	HEK293_PACight1_PACAP38_A10_A10_010.fcs	stable_HEK293_PAClight1_10	stable_HEK293_PAClight1	10	300	7965.36
HEK293_PACight1_PACAP38_A10_A10_010.fcs	HEK293_PACight1_PACAP38_A10_A10_010.fcs	stable_HEK293_PAClight1_10	stable_HEK293_PAClight1	10	300	3721.86
HEK293_PACight1_PACAP38_A10_A10_010.fcs	HEK293_PACight1_PACAP38_A10_A10_010.fcs	stable_HEK293_PAClight1_10	stable_HEK293_PAClight1	10	300	518.88
HEK293_PACight1_PACAP38_A10_A10_010.fcs	HEK293_PACight1_PACAP38_A10_A10_010.fcs	stable_HEK293_PAClight1_10	stable_HEK293_PAClight1	10	300	1603.56
HEK293_PACight1_PACAP38_A10_A10_010.fcs	HEK293_PACight1_PACAP38_A10_A10_010.fcs	stable_HEK293_PAClight1_10	stable_HEK293_PAClight1	10	300	8360.04
HEK293_PACight1_PACAP38_A10_A10_010.fcs	HEK293_PACight1_PACAP38_A10_A10_010.fcs	stable_HEK293_PAClight1_10	stable_HEK293_PAClight1	10	300	3908.16
HEK293_PACight1_PACAP38_A10_A10_010.fcs	HEK293_PACight1_PACAP38_A10_A10_010.fcs	stable_HEK293_PAClight1_10	stable_HEK293_PAClight1	10	300	5197.08
HEK293_PACight1_PACAP38_A10_A10_010.fcs	HEK293_PACight1_PACAP38_A10_A10_010.fcs	stable_HEK293_PAClight1_10	stable_HEK293_PAClight1	10	300	3640.44
HEK293_PACight1_PACAP38_A10_A10_010.fcs	HEK293_PACight1_PACAP38_A10_A10_010.fcs	stable_HEK293_PAClight1_10	stable_HEK293_PAClight1	10	300	153.18
HEK293_PACight1_PACAP38_A10_A10_010.fcs	HEK293_PACight1_PACAP38_A10_A10_010.fcs	stable_HEK293_PAClight1_10	stable_HEK293_PAClight1	10	300	6378.36
HEK293_PACight1_PACAP38_A10_A10_010.fcs	HEK293_PACight1_PACAP38_A10_A10_010.fcs	stable_HEK293_PAClight1_10	stable_HEK293_PAClight1	10	300	110.4
HEK293_PACight1_PACAP38_A10_A10_010.fcs	HEK293_PACight1_PACAP38_A10_A10_010.fcs	stable_HEK293_PAClight1_10	stable_HEK293_PAClight1	10	300	5976.78
HEK293_PACight1_PACAP38_A10_A10_010.fcs	HEK293_PACight1_PACAP38_A10_A10_010.fcs	stable_HEK293_PAClight1_10	stable_HEK293_PAClight1	10	300	11258
HEK293_PACight1_PACAP38_A10_A10_010.fcs	HEK293_PACight1_PACAP38_A10_A10_010.fcs	stable_HEK293_PAClight1_10	stable_HEK293_PAClight1	10	300	3766.02
HEK293_PACight1_PACAP38_A10_A10_010.fcs	HEK293_PACight1_PACAP38_A10_A10_010.fcs	stable_HEK293_PAClight1_10	stable_HEK293_PAClight1	10	300	6011.28
HEK293_PACight1_PACAP38_A10_A10_010.fcs	HEK293_PACight1_PACAP38_A10_A10_010.fcs	stable_HEK293_PAClight1_10	stable_HEK293_PAClight1	10	300	3563.16
HEK293_PACight1_PACAP38_A10_A10_010.fcs	HEK293_PACight1_PACAP38_A10_A10_010.fcs	stable_HEK293_PAClight1_10	stable_HEK293_PAClight1	10	300	423.66
HEK293_PACight1_PACAP38_A10_A10_010.fcs	HEK293_PACight1_PACAP38_A10_A10_010.fcs	stable_HEK293_PAClight1_10	stable_HEK293_PAClight1	10	300	5703.54
HEK293_PACight1_PACAP38_A10_A10_010.fcs	HEK293_PACight1_PACAP38_A10_A10_010.fcs	stable_HEK293_PAClight1_10	stable_HEK293_PAClight1	10	300	6612.96
HEK293_PACight1_PACAP38_A10_A10_010.fcs	HEK293_PACight1_PACAP38_A10_A10_010.fcs	stable_HEK293_PAClight1_10	stable_HEK293_PAClight1	10	300	1497.3
HEK293_PACight1_PACAP38_A10_A10_010.fcs	HEK293_PACight1_PACAP38_A10_A10_010.fcs	stable_HEK293_PAClight1_10	stable_HEK293_PAClight1	10	300	4431.18
HEK293_PACight1_PACAP38_A10_A10_010.fcs	HEK293_PACight1_PACAP38_A10_A10_010.fcs	stable_HEK293_PAClight1_10	stable_HEK293_PAClight1	10	300	3183.66
HEK293_PACight1_PACAP38_A10_A10_010.fcs	HEK293_PACight1_PACAP38_A10_A10_010.fcs	stable_HEK293_PAClight1_10	stable_HEK293_PAClight1	10	300	8808.54
HEK293_PACight1_PACAP38_A10_A10_010.fcs	HEK293_PACight1_PACAP38_A10_A10_010.fcs	stable_HEK293_PAClight1_10	stable_HEK293_PAClight1	10	300	4669.92
HEK293_PACight1_PACAP38_A10_A10_010.fcs	HEK293_PACight1_PACAP38_A10_A10_010.fcs	stable_HEK293_PAClight1_10	stable_HEK293_PAClight1	10	300	3930.24
HEK293_PACight1_PACAP38_A10_A10_010.fcs	HEK293_PACight1_PACAP38_A10_A10_010.fcs	stable_HEK293_PAClight1_10	stable_HEK293_PAClight1	10	300	5310.24
HEK293_PACight1_PACAP38_A10_A10_010.fcs	HEK293_PACight1_PACAP38_A10_A10_010.fcs	stable_HEK293_PAClight1_10	stable_HEK293_PAClight1	10	300	2205.24
HEK293_PACight1_PACAP38_A10_A10_010.fcs	HEK293_PACight1_PACAP38_A10_A10_010.fcs	stable_HEK293_PAClight1_10	stable_HEK293_PAClight1	10	300	6567.42
HEK293_PACight1_PACAP38_A10_A10_010.fcs	HEK293_PACight1_PACAP38_A10_A10_010.fcs	stable_HEK293_PAClight1_10	stable_HEK293_PAClight1	10	300	8216.52
HEK293_PACight1_PACAP38_A10_A10_010.fcs	HEK293_PACight1_PACAP38_A10_A10_010.fcs	stable_HEK293_PAClight1_10	stable_HEK293_PAClight1	10	300	5177.76
HEK293_PACight1_PACAP38_A10_A10_010.fcs	HEK293_PACight1_PACAP38_A10_A10_010.fcs	stable_HEK293_PAClight1_10	stable_HEK293_PAClight1	10	300	2768.28
HEK293_PACight1_PACAP38_A10_A10_010.fcs	HEK293_PACight1_PACAP38_A10_A10_010.fcs	stable_HEK293_PAClight1_10	stable_HEK293_PAClight1	10	300	659.64
HEK293_PACight1_PACAP38_A10_A10_010.fcs	HEK293_PACight1_PACAP38_A10_A10_010.fcs	stable_HEK293_PAClight1_10	stable_HEK293_PAClight1	10	300	2315.64
HEK293_PACight1_PACAP38_A10_A10_010.fcs	HEK293_PACight1_PACAP38_A10_A10_010.fcs	stable_HEK293_PAClight1_10	stable_HEK293_PAClight1	10	300	5108.76
HEK293_PACight1_PACAP38_A10_A10_010.fcs	HEK293_PACight1_PACAP38_A10_A10_010.fcs	stable_HEK293_PAClight1_10	stable_HEK293_PAClight1	10	300	3334.08
HEK293_PACight1_PACAP38_A10_A10_010.fcs	HEK293_PACight1_PACAP38_A10_A10_010.fcs	stable_HEK293_PAClight1_10	stable_HEK293_PAClight1	10	300	2964.24
HEK293_PACight1_PACAP38_A10_A10_010.fcs	HEK293_PACight1_PACAP38_A10_A10_010.fcs	stable_HEK293_PAClight1_10	stable_HEK293_PAClight1	10	300	1294.44
HEK293_PACight1_PACAP38_A10_A10_010.fcs	HEK293_PACight1_PACAP38_A10_A10_010.fcs	stable_HEK293_PAClight1_10	stable_HEK293_PAClight1	10	300	1690.5
HEK293_PACight1_PACAP38_A10_A10_010.fcs	HEK293_PACight1_PACAP38_A10_A10_010.fcs	stable_HEK293_PAClight1_10	stable_HEK293_PAClight1	10	300	6393.54
HEK293_PACight1_PACAP38_A10_A10_010.fcs	HEK293_PACight1_PACAP38_A10_A10_010.fcs	stable_HEK293_PAClight1_10	stable_HEK293_PAClight1	10	300	4391.16
HEK293_PACight1_PACAP38_A10_A10_010.fcs	HEK293_PACight1_PACAP38_A10_A10_010.fcs	stable_HEK293_PAClight1_10	stable_HEK293_PAClight1	10	300	4265.58
HEK293_PACight1_PACAP38_A10_A10_010.fcs	HEK293_PACight1_PACAP38_A10_A10_010.fcs	stable_HEK293_PAClight1_10	stable_HEK293_PAClight1	10	300	7578.96
HEK293_PACight1_PACAP38_A10_A10_010.fcs	HEK293_PACight1_PACAP38_A10_A10_010.fcs	stable_HEK293_PAClight1_10	stable_HEK293_PAClight1	10	300	636.18
HEK293_PACight1_PACAP38_A10_A10_010.fcs	HEK293_PACight1_PACAP38_A10_A10_010.fcs	stable_HEK293_PAClight1_10	stable_HEK293_PAClight1	10	300	17283.1
HEK293_PACight1_PACAP38_A10_A10_010.fcs	HEK293_PACight1_PACAP38_A10_A10_010.fcs	stable_HEK293_PAClight1_10	stable_HEK293_PAClight1	10	300	6203.1
HEK293_PACight1_PACAP38_A10_A10_010.fcs	HEK293_PACight1_PACAP38_A10_A10_010.fcs	stable_HEK293_PAClight1_10	stable_HEK293_PAClight1	10	300	2497.8
HEK293_PACight1_PACAP38_A10_A10_010.fcs	HEK293_PACight1_PACAP38_A10_A10_010.fcs	stable_HEK293_PAClight1_10	stable_HEK293_PAClight1	10	300	4393.92
HEK293_PACight1_PACAP38_A10_A10_010.fcs	HEK293_PACight1_PACAP38_A10_A10_010.fcs	stable_HEK293_PAClight1_10	stable_HEK293_PAClight1	10	300	4326.3
HEK293_PACight1_PACAP38_A10_A10_010.fcs	HEK293_PACight1_PACAP38_A10_A10_010.fcs	stable_HEK293_PAClight1_10	stable_HEK293_PAClight1	10	300	3303.72
HEK293_PACight1_PACAP38_A10_A10_010.fcs	HEK293_PACight1_PACAP38_A10_A10_010.fcs	stable_HEK293_PAClight1_10	stable_HEK293_PAClight1	10	300	11183.5
HEK293_PACight1_PACAP38_A10_A10_010.fcs	HEK293_PACight1_PACAP38_A10_A10_010.fcs	stable_HEK293_PAClight1_10	stable_HEK293_PAClight1	10	300	3477.6
HEK293_PACight1_PACAP38_A10_A10_010.fcs	HEK293_PACight1_PACAP38_A10_A10_010.fcs	stable_HEK293_PAClight1_10	stable_HEK293_PAClight1	10	300	2289.42
HEK293_PACight1_PACAP38_A10_A10_010.fcs	HEK293_PACight1_PACAP38_A10_A10_010.fcs	stable_HEK293_PAClight1_10	stable_HEK293_PAClight1	10	300	166.98
HEK293_PACight1_PACAP38_A10_A10_010.fcs	HEK293_PACight1_PACAP38_A10_A10_010.fcs	stable_HEK293_PAClight1_10	stable_HEK293_PAClight1	10	300	12392.4
HEK293_PACight1_PACAP38_A10_A10_010.fcs	HEK293_PACight1_PACAP38_A10_A10_010.fcs	stable_HEK293_PAClight1_10	stable_HEK293_PAClight1	10	300	2871.78
HEK293_PACight1_PACAP38_A10_A10_010.fcs	HEK293_PACight1_PACAP38_A10_A10_010.fcs	stable_HEK293_PAClight1_10	stable_HEK293_PAClight1	10	300	1432.44
HEK293_PACight1_PACAP38_A10_A10_010.fcs	HEK293_PACight1_PACAP38_A10_A10_010.fcs	stable_HEK293_PAClight1_10	stable_HEK293_PAClight1	10	300	-28.98
HEK293_PACight1_PACAP38_A10_A10_010.fcs	HEK293_PACight1_PACAP38_A10_A10_010.fcs	stable_HEK293_PAClight1_10	stable_HEK293_PAClight1	10	300	6204.48
HEK293_PACight1_PACAP38_A10_A10_010.fcs	HEK293_PACight1_PACAP38_A10_A10_010.fcs	stable_HEK293_PAClight1_10	stable_HEK293_PAClight1	10	300	6185.16
HEK293_PACight1_PACAP38_A10_A10_010.fcs	HEK293_PACight1_PACAP38_A10_A10_010.fcs	stable_HEK293_PAClight1_10	stable_HEK293_PAClight1	10	300	4669.92
HEK293_PACight1_PACAP38_A10_A10_010.fcs	HEK293_PACight1_PACAP38_A10_A10_010.fcs	stable_HEK293_PAClight1_10	stable_HEK293_PAClight1	10	300	1944.42
HEK293_PACight1_PACAP38_A10_A10_010.fcs	HEK293_PACight1_PACAP38_A10_A10_010.fcs	stable_HEK293_PAClight1_10	stable_HEK293_PAClight1	10	300	1341.36
HEK293_PACight1_PACAP38_A10_A10_010.fcs	HEK293_PACight1_PACAP38_A10_A10_010.fcs	stable_HEK293_PAClight1_10	stable_HEK293_PAClight1	10	300	189.06
HEK293_PACight1_PACAP38_A10_A10_010.fcs	HEK293_PACight1_PACAP38_A10_A10_010.fcs	stable_HEK293_PAClight1_10	stable_HEK293_PAClight1	10	300	2998.74
HEK293_PACight1_PACAP38_A10_A10_010.fcs	HEK293_PACight1_PACAP38_A10_A10_010.fcs	stable_HEK293_PAClight1_10	stable_HEK293_PAClight1	10	300	5896.74
HEK293_PACight1_PACAP38_A10_A10_010.fcs	HEK293_PACight1_PACAP38_A10_A10_010.fcs	stable_HEK293_PAClight1_10	stable_HEK293_PAClight1	10	300	7864.62
HEK293_PACight1_PACAP38_A10_A10_010.fcs	HEK293_PACight1_PACAP38_A10_A10_010.fcs	stable_HEK293_PAClight1_10	stable_HEK293_PAClight1	10	300	4447.74
HEK293_PACight1_PACAP38_A10_A10_010.fcs	HEK293_PACight1_PACAP38_A10_A10_010.fcs	stable_HEK293_PAClight1_10	stable_HEK293_PAClight1	10	300	5463.42
HEK293_PACight1_PACAP38_A10_A10_010.fcs	HEK293_PACight1_PACAP38_A10_A10_010.fcs	stable_HEK293_PAClight1_10	stable_HEK293_PAClight1	10	300	4707.18
HEK293_PACight1_PACAP38_A10_A10_010.fcs	HEK293_PACight1_PACAP38_A10_A10_010.fcs	stable_HEK293_PAClight1_10	stable_HEK293_PAClight1	10	300	4878.3
HEK293_PACight1_PACAP38_A10_A10_010.fcs	HEK293_PACight1_PACAP38_A10_A10_010.fcs	stable_HEK293_PAClight1_10	stable_HEK293_PAClight1	10	300	2562.66
HEK293_PACight1_PACAP38_A10_A10_010.fcs	HEK293_PACight1_PACAP38_A10_A10_010.fcs	stable_HEK293_PAClight1_10	stable_HEK293_PAClight1	10	300	3999.24
HEK293_PACight1_PACAP38_A10_A10_010.fcs	HEK293_PACight1_PACAP38_A10_A10_010.fcs	stable_HEK293_PAClight1_10	stable_HEK293_PAClight1	10	300	8140.62
HEK293_PACight1_PACAP38_A10_A10_010.fcs	HEK293_PACight1_PACAP38_A10_A10_010.fcs	stable_HEK293_PAClight1_10	stable_HEK293_PAClight1	10	300	7006.26
HEK293_PACight1_PACAP38_A10_A10_010.fcs	HEK293_PACight1_PACAP38_A10_A10_010.fcs	stable_HEK293_PAClight1_10	stable_HEK293_PAClight1	10	300	2736.54
HEK293_PACight1_PACAP38_A10_A10_010.fcs	HEK293_PACight1_PACAP38_A10_A10_010.fcs	stable_HEK293_PAClight1_10	stable_HEK293_PAClight1	10	300	7839.78
HEK293_PACight1_PACAP38_A10_A10_010.fcs	HEK293_PACight1_PACAP38_A10_A10_010.fcs	stable_HEK293_PAClight1_10	stable_HEK293_PAClight1	10	300	4185.54
HEK293_PACight1_PACAP38_A10_A10_010.fcs	HEK293_PACight1_PACAP38_A10_A10_010.fcs	stable_HEK293_PAClight1_10	stable_HEK293_PAClight1	10	300	213.9
HEK293_PACight1_PACAP38_A10_A10_010.fcs	HEK293_PACight1_PACAP38_A10_A10_010.fcs	stable_HEK293_PAClight1_10	stable_HEK293_PAClight1	10	300	3416.88
HEK293_PACight1_PACAP38_A10_A10_010.fcs	HEK293_PACight1_PACAP38_A10_A10_010.fcs	stable_HEK293_PAClight1_10	stable_HEK293_PAClight1	10	300	4525.02
HEK293_PACight1_PACAP38_A10_A10_010.fcs	HEK293_PACight1_PACAP38_A10_A10_010.fcs	stable_HEK293_PAClight1_10	stable_HEK293_PAClight1	10	300	4239.36
HEK293_PACight1_PACAP38_A10_A10_010.fcs	HEK293_PACight1_PACAP38_A10_A10_010.fcs	stable_HEK293_PAClight1_10	stable_HEK293_PAClight1	10	300	138
HEK293_PACight1_PACAP38_A10_A10_010.fcs	HEK293_PACight1_PACAP38_A10_A10_010.fcs	stable_HEK293_PAClight1_10	stable_HEK293_PAClight1	10	300	3588
HEK293_PACight1_PACAP38_A10_A10_010.fcs	HEK293_PACight1_PACAP38_A10_A10_010.fcs	stable_HEK293_PAClight1_10	stable_HEK293_PAClight1	10	300	3835.02
HEK293_PACight1_PACAP38_A10_A10_010.fcs	HEK293_PACight1_PACAP38_A10_A10_010.fcs	stable_HEK293_PAClight1_10	stable_HEK293_PAClight1	10	300	1643.58
HEK293_PACight1_PACAP38_A10_A10_010.fcs	HEK293_PACight1_PACAP38_A10_A10_010.fcs	stable_HEK293_PAClight1_10	stable_HEK293_PAClight1	10	300	3852.96
HEK293_PACight1_PACAP38_A10_A10_010.fcs	HEK293_PACight1_PACAP38_A10_A10_010.fcs	stable_HEK293_PAClight1_10	stable_HEK293_PAClight1	10	300	9446.1
HEK293_PACight1_PACAP38_A10_A10_010.fcs	HEK293_PACight1_PACAP38_A10_A10_010.fcs	stable_HEK293_PAClight1_10	stable_HEK293_PAClight1	10	300	9063.84
HEK293_PACight1_PACAP38_A10_A10_010.fcs	HEK293_PACight1_PACAP38_A10_A10_010.fcs	stable_HEK293_PAClight1_10	stable_HEK293_PAClight1	10	300	51.06
HEK293_PACight1_PACAP38_A10_A10_010.fcs	HEK293_PACight1_PACAP38_A10_A10_010.fcs	stable_HEK293_PAClight1_10	stable_HEK293_PAClight1	10	300	329.82
HEK293_PACight1_PACAP38_A10_A10_010.fcs	HEK293_PACight1_PACAP38_A10_A10_010.fcs	stable_HEK293_PAClight1_10	stable_HEK293_PAClight1	10	300	8325.54
HEK293_PACight1_PACAP38_A10_A10_010.fcs	HEK293_PACight1_PACAP38_A10_A10_010.fcs	stable_HEK293_PAClight1_10	stable_HEK293_PAClight1	10	300	5301.96
HEK293_PACight1_PACAP38_A10_A10_010.fcs	HEK293_PACight1_PACAP38_A10_A10_010.fcs	stable_HEK293_PAClight1_10	stable_HEK293_PAClight1	10	300	7617.6
HEK293_PACight1_PACAP38_A10_A10_010.fcs	HEK293_PACight1_PACAP38_A10_A10_010.fcs	stable_HEK293_PAClight1_10	stable_HEK293_PAClight1	10	300	1546.98
HEK293_PACight1_PACAP38_A10_A10_010.fcs	HEK293_PACight1_PACAP38_A10_A10_010.fcs	stable_HEK293_PAClight1_10	stable_HEK293_PAClight1	10	300	4933.5
HEK293_PACight1_PACAP38_A10_A10_010.fcs	HEK293_PACight1_PACAP38_A10_A10_010.fcs	stable_HEK293_PAClight1_10	stable_HEK293_PAClight1	10	300	9706.92
HEK293_PACight1_PACAP38_A10_A10_010.fcs	HEK293_PACight1_PACAP38_A10_A10_010.fcs	stable_HEK293_PAClight1_10	stable_HEK293_PAClight1	10	300	3745.32
HEK293_PACight1_PACAP38_A10_A10_010.fcs	HEK293_PACight1_PACAP38_A10_A10_010.fcs	stable_HEK293_PAClight1_10	stable_HEK293_PAClight1	10	300	8313.12
HEK293_PACight1_PACAP38_A10_A10_010.fcs	HEK293_PACight1_PACAP38_A10_A10_010.fcs	stable_HEK293_PAClight1_10	stable_HEK293_PAClight1	10	300	1922.34
HEK293_PACight1_PACAP38_A10_A10_010.fcs	HEK293_PACight1_PACAP38_A10_A10_010.fcs	stable_HEK293_PAClight1_10	stable_HEK293_PAClight1	10	300	5056.32
HEK293_PACight1_PACAP38_A10_A10_010.fcs	HEK293_PACight1_PACAP38_A10_A10_010.fcs	stable_HEK293_PAClight1_10	stable_HEK293_PAClight1	10	300	8023.32
HEK293_PACight1_PACAP38_A10_A10_010.fcs	HEK293_PACight1_PACAP38_A10_A10_010.fcs	stable_HEK293_PAClight1_10	stable_HEK293_PAClight1	10	300	3231.96
HEK293_PACight1_PACAP38_A10_A10_010.fcs	HEK293_PACight1_PACAP38_A10_A10_010.fcs	stable_HEK293_PAClight1_10	stable_HEK293_PAClight1	10	300	2851.08
HEK293_PACight1_PACAP38_A10_A10_010.fcs	HEK293_PACight1_PACAP38_A10_A10_010.fcs	stable_HEK293_PAClight1_10	stable_HEK293_PAClight1	10	300	5859.48
HEK293_PACight1_PACAP38_A10_A10_010.fcs	HEK293_PACight1_PACAP38_A10_A10_010.fcs	stable_HEK293_PAClight1_10	stable_HEK293_PAClight1	10	300	8811.3
HEK293_PACight1_PACAP38_A10_A10_010.fcs	HEK293_PACight1_PACAP38_A10_A10_010.fcs	stable_HEK293_PAClight1_10	stable_HEK293_PAClight1	10	300	3030.48
HEK293_PACight1_PACAP38_A10_A10_010.fcs	HEK293_PACight1_PACAP38_A10_A10_010.fcs	stable_HEK293_PAClight1_10	stable_HEK293_PAClight1	10	300	2328.06
HEK293_PACight1_PACAP38_A10_A10_010.fcs	HEK293_PACight1_PACAP38_A10_A10_010.fcs	stable_HEK293_PAClight1_10	stable_HEK293_PAClight1	10	300	8872.02
HEK293_PACight1_PACAP38_A10_A10_010.fcs	HEK293_PACight1_PACAP38_A10_A10_010.fcs	stable_HEK293_PAClight1_10	stable_HEK293_PAClight1	10	300	5604.18
HEK293_PACight1_PACAP38_A10_A10_010.fcs	HEK293_PACight1_PACAP38_A10_A10_010.fcs	stable_HEK293_PAClight1_10	stable_HEK293_PAClight1	10	300	3169.86
HEK293_PACight1_PACAP38_A10_A10_010.fcs	HEK293_PACight1_PACAP38_A10_A10_010.fcs	stable_HEK293_PAClight1_10	stable_HEK293_PAClight1	10	300	5005.26
HEK293_PACight1_PACAP38_A10_A10_010.fcs	HEK293_PACight1_PACAP38_A10_A10_010.fcs	stable_HEK293_PAClight1_10	stable_HEK293_PAClight1	10	300	4700.28
HEK293_PACight1_PACAP38_A10_A10_010.fcs	HEK293_PACight1_PACAP38_A10_A10_010.fcs	stable_HEK293_PAClight1_10	stable_HEK293_PAClight1	10	300	2347.38
HEK293_PACight1_PACAP38_A10_A10_010.fcs	HEK293_PACight1_PACAP38_A10_A10_010.fcs	stable_HEK293_PAClight1_10	stable_HEK293_PAClight1	10	300	9865.62
HEK293_PACight1_PACAP38_A10_A10_010.fcs	HEK293_PACight1_PACAP38_A10_A10_010.fcs	stable_HEK293_PAClight1_10	stable_HEK293_PAClight1	10	300	14648.7
HEK293_PACight1_PACAP38_A10_A10_010.fcs	HEK293_PACight1_PACAP38_A10_A10_010.fcs	stable_HEK293_PAClight1_10	stable_HEK293_PAClight1	10	300	2675.82
HEK293_PACight1_PACAP38_A10_A10_010.fcs	HEK293_PACight1_PACAP38_A10_A10_010.fcs	stable_HEK293_PAClight1_10	stable_HEK293_PAClight1	10	300	4716.84
HEK293_PACight1_PACAP38_A10_A10_010.fcs	HEK293_PACight1_PACAP38_A10_A10_010.fcs	stable_HEK293_PAClight1_10	stable_HEK293_PAClight1	10	300	1029.48
HEK293_PACight1_PACAP38_A10_A10_010.fcs	HEK293_PACight1_PACAP38_A10_A10_010.fcs	stable_HEK293_PAClight1_10	stable_HEK293_PAClight1	10	300	21637
HEK293_PACight1_PACAP38_A10_A10_010.fcs	HEK293_PACight1_PACAP38_A10_A10_010.fcs	stable_HEK293_PAClight1_10	stable_HEK293_PAClight1	10	300	5844.3
HEK293_PACight1_PACAP38_A10_A10_010.fcs	HEK293_PACight1_PACAP38_A10_A10_010.fcs	stable_HEK293_PAClight1_10	stable_HEK293_PAClight1	10	300	5540.7
HEK293_PACight1_PACAP38_A10_A10_010.fcs	HEK293_PACight1_PACAP38_A10_A10_010.fcs	stable_HEK293_PAClight1_10	stable_HEK293_PAClight1	10	300	5911.92
HEK293_PACight1_PACAP38_A10_A10_010.fcs	HEK293_PACight1_PACAP38_A10_A10_010.fcs	stable_HEK293_PAClight1_10	stable_HEK293_PAClight1	10	300	6388.02
HEK293_PACight1_PACAP38_A10_A10_010.fcs	HEK293_PACight1_PACAP38_A10_A10_010.fcs	stable_HEK293_PAClight1_10	stable_HEK293_PAClight1	10	300	3524.52
HEK293_PACight1_PACAP38_A10_A10_010.fcs	HEK293_PACight1_PACAP38_A10_A10_010.fcs	stable_HEK293_PAClight1_10	stable_HEK293_PAClight1	10	300	7053.18
HEK293_PACight1_PACAP38_A10_A10_010.fcs	HEK293_PACight1_PACAP38_A10_A10_010.fcs	stable_HEK293_PAClight1_10	stable_HEK293_PAClight1	10	300	3140.88
HEK293_PACight1_PACAP38_A10_A10_010.fcs	HEK293_PACight1_PACAP38_A10_A10_010.fcs	stable_HEK293_PAClight1_10	stable_HEK293_PAClight1	10	300	7258.8
HEK293_PACight1_PACAP38_A10_A10_010.fcs	HEK293_PACight1_PACAP38_A10_A10_010.fcs	stable_HEK293_PAClight1_10	stable_HEK293_PAClight1	10	300	6628.14
HEK293_PACight1_PACAP38_A10_A10_010.fcs	HEK293_PACight1_PACAP38_A10_A10_010.fcs	stable_HEK293_PAClight1_10	stable_HEK293_PAClight1	10	300	5582.1
HEK293_PACight1_PACAP38_A10_A10_010.fcs	HEK293_PACight1_PACAP38_A10_A10_010.fcs	stable_HEK293_PAClight1_10	stable_HEK293_PAClight1	10	300	5589
HEK293_PACight1_PACAP38_A10_A10_010.fcs	HEK293_PACight1_PACAP38_A10_A10_010.fcs	stable_HEK293_PAClight1_10	stable_HEK293_PAClight1	10	300	3630.78
HEK293_PACight1_PACAP38_A10_A10_010.fcs	HEK293_PACight1_PACAP38_A10_A10_010.fcs	stable_HEK293_PAClight1_10	stable_HEK293_PAClight1	10	300	3946.8
HEK293_PACight1_PACAP38_A10_A10_010.fcs	HEK293_PACight1_PACAP38_A10_A10_010.fcs	stable_HEK293_PAClight1_10	stable_HEK293_PAClight1	10	300	4518.12
HEK293_PACight1_PACAP38_A10_A10_010.fcs	HEK293_PACight1_PACAP38_A10_A10_010.fcs	stable_HEK293_PAClight1_10	stable_HEK293_PAClight1	10	300	4816.2
HEK293_PACight1_PACAP38_A10_A10_010.fcs	HEK293_PACight1_PACAP38_A10_A10_010.fcs	stable_HEK293_PAClight1_10	stable_HEK293_PAClight1	10	300	5255.04
HEK293_PACight1_PACAP38_A10_A10_010.fcs	HEK293_PACight1_PACAP38_A10_A10_010.fcs	stable_HEK293_PAClight1_10	stable_HEK293_PAClight1	10	300	7464.42
HEK293_PACight1_PACAP38_A10_A10_010.fcs	HEK293_PACight1_PACAP38_A10_A10_010.fcs	stable_HEK293_PAClight1_10	stable_HEK293_PAClight1	10	300	10297.6
HEK293_PACight1_PACAP38_A10_A10_010.fcs	HEK293_PACight1_PACAP38_A10_A10_010.fcs	stable_HEK293_PAClight1_10	stable_HEK293_PAClight1	10	300	6704.04
HEK293_PACight1_PACAP38_A10_A10_010.fcs	HEK293_PACight1_PACAP38_A10_A10_010.fcs	stable_HEK293_PAClight1_10	stable_HEK293_PAClight1	10	300	3600.42
HEK293_PACight1_PACAP38_A10_A10_010.fcs	HEK293_PACight1_PACAP38_A10_A10_010.fcs	stable_HEK293_PAClight1_10	stable_HEK293_PAClight1	10	300	7435.44
HEK293_PACight1_PACAP38_A10_A10_010.fcs	HEK293_PACight1_PACAP38_A10_A10_010.fcs	stable_HEK293_PAClight1_10	stable_HEK293_PAClight1	10	300	4531.92
HEK293_PACight1_PACAP38_A10_A10_010.fcs	HEK293_PACight1_PACAP38_A10_A10_010.fcs	stable_HEK293_PAClight1_10	stable_HEK293_PAClight1	10	300	6966.24
HEK293_PACight1_PACAP38_A10_A10_010.fcs	HEK293_PACight1_PACAP38_A10_A10_010.fcs	stable_HEK293_PAClight1_10	stable_HEK293_PAClight1	10	300	3252.66
HEK293_PACight1_PACAP38_A10_A10_010.fcs	HEK293_PACight1_PACAP38_A10_A10_010.fcs	stable_HEK293_PAClight1_10	stable_HEK293_PAClight1	10	300	3180.9
HEK293_PACight1_PACAP38_A10_A10_010.fcs	HEK293_PACight1_PACAP38_A10_A10_010.fcs	stable_HEK293_PAClight1_10	stable_HEK293_PAClight1	10	300	6070.62
HEK293_PACight1_PACAP38_A10_A10_010.fcs	HEK293_PACight1_PACAP38_A10_A10_010.fcs	stable_HEK293_PAClight1_10	stable_HEK293_PAClight1	10	300	3231.96
HEK293_PACight1_PACAP38_A10_A10_010.fcs	HEK293_PACight1_PACAP38_A10_A10_010.fcs	stable_HEK293_PAClight1_10	stable_HEK293_PAClight1	10	300	8520.12
HEK293_PACight1_PACAP38_A10_A10_010.fcs	HEK293_PACight1_PACAP38_A10_A10_010.fcs	stable_HEK293_PAClight1_10	stable_HEK293_PAClight1	10	300	12878.2
HEK293_PACight1_PACAP38_A10_A10_010.fcs	HEK293_PACight1_PACAP38_A10_A10_010.fcs	stable_HEK293_PAClight1_10	stable_HEK293_PAClight1	10	300	3706.68
HEK293_PACight1_PACAP38_A10_A10_010.fcs	HEK293_PACight1_PACAP38_A10_A10_010.fcs	stable_HEK293_PAClight1_10	stable_HEK293_PAClight1	10	300	4475.34
HEK293_PACight1_PACAP38_A10_A10_010.fcs	HEK293_PACight1_PACAP38_A10_A10_010.fcs	stable_HEK293_PAClight1_10	stable_HEK293_PAClight1	10	300	20748.3
HEK293_PACight1_PACAP38_A10_A10_010.fcs	HEK293_PACight1_PACAP38_A10_A10_010.fcs	stable_HEK293_PAClight1_10	stable_HEK293_PAClight1	10	300	2058.96
HEK293_PACight1_PACAP38_A10_A10_010.fcs	HEK293_PACight1_PACAP38_A10_A10_010.fcs	stable_HEK293_PAClight1_10	stable_HEK293_PAClight1	10	300	1142.64
HEK293_PACight1_PACAP38_A10_A10_010.fcs	HEK293_PACight1_PACAP38_A10_A10_010.fcs	stable_HEK293_PAClight1_10	stable_HEK293_PAClight1	10	300	2702.04
HEK293_PACight1_PACAP38_A10_A10_010.fcs	HEK293_PACight1_PACAP38_A10_A10_010.fcs	stable_HEK293_PAClight1_10	stable_HEK293_PAClight1	10	300	3726
HEK293_PACight1_PACAP38_A10_A10_010.fcs	HEK293_PACight1_PACAP38_A10_A10_010.fcs	stable_HEK293_PAClight1_10	stable_HEK293_PAClight1	10	300	1334.46
HEK293_PACight1_PACAP38_A10_A10_010.fcs	HEK293_PACight1_PACAP38_A10_A10_010.fcs	stable_HEK293_PAClight1_10	stable_HEK293_PAClight1	10	300	1519.38
HEK293_PACight1_PACAP38_A10_A10_010.fcs	HEK293_PACight1_PACAP38_A10_A10_010.fcs	stable_HEK293_PAClight1_10	stable_HEK293_PAClight1	10	300	1705.68
HEK293_PACight1_PACAP38_A10_A10_010.fcs	HEK293_PACight1_PACAP38_A10_A10_010.fcs	stable_HEK293_PAClight1_10	stable_HEK293_PAClight1	10	300	2361.18
HEK293_PACight1_PACAP38_A10_A10_010.fcs	HEK293_PACight1_PACAP38_A10_A10_010.fcs	stable_HEK293_PAClight1_10	stable_HEK293_PAClight1	10	300	5811.18
HEK293_PACight1_PACAP38_A10_A10_010.fcs	HEK293_PACight1_PACAP38_A10_A10_010.fcs	stable_HEK293_PAClight1_10	stable_HEK293_PAClight1	10	300	3894.36
HEK293_PACight1_PACAP38_A10_A10_010.fcs	HEK293_PACight1_PACAP38_A10_A10_010.fcs	stable_HEK293_PAClight1_10	stable_HEK293_PAClight1	10	300	7308.48
HEK293_PACight1_PACAP38_A10_A10_010.fcs	HEK293_PACight1_PACAP38_A10_A10_010.fcs	stable_HEK293_PAClight1_10	stable_HEK293_PAClight1	10	300	107.64
HEK293_PACight1_PACAP38_A10_A10_010.fcs	HEK293_PACight1_PACAP38_A10_A10_010.fcs	stable_HEK293_PAClight1_10	stable_HEK293_PAClight1	10	300	4899
HEK293_PACight1_PACAP38_A10_A10_010.fcs	HEK293_PACight1_PACAP38_A10_A10_010.fcs	stable_HEK293_PAClight1_10	stable_HEK293_PAClight1	10	300	3817.08
HEK293_PACight1_PACAP38_A10_A10_010.fcs	HEK293_PACight1_PACAP38_A10_A10_010.fcs	stable_HEK293_PAClight1_10	stable_HEK293_PAClight1	10	300	1462.8
HEK293_PACight1_PACAP38_A10_A10_010.fcs	HEK293_PACight1_PACAP38_A10_A10_010.fcs	stable_HEK293_PAClight1_10	stable_HEK293_PAClight1	10	300	95.22
HEK293_PACight1_PACAP38_A10_A10_010.fcs	HEK293_PACight1_PACAP38_A10_A10_010.fcs	stable_HEK293_PAClight1_10	stable_HEK293_PAClight1	10	300	12170.2
HEK293_PACight1_PACAP38_A10_A10_010.fcs	HEK293_PACight1_PACAP38_A10_A10_010.fcs	stable_HEK293_PAClight1_10	stable_HEK293_PAClight1	10	300	3307.86
HEK293_PACight1_PACAP38_A10_A10_010.fcs	HEK293_PACight1_PACAP38_A10_A10_010.fcs	stable_HEK293_PAClight1_10	stable_HEK293_PAClight1	10	300	6167.22
HEK293_PACight1_PACAP38_A10_A10_010.fcs	HEK293_PACight1_PACAP38_A10_A10_010.fcs	stable_HEK293_PAClight1_10	stable_HEK293_PAClight1	10	300	2719.98
HEK293_PACight1_PACAP38_A10_A10_010.fcs	HEK293_PACight1_PACAP38_A10_A10_010.fcs	stable_HEK293_PAClight1_10	stable_HEK293_PAClight1	10	300	2333.58
HEK293_PACight1_PACAP38_A10_A10_010.fcs	HEK293_PACight1_PACAP38_A10_A10_010.fcs	stable_HEK293_PAClight1_10	stable_HEK293_PAClight1	10	300	2568.18
HEK293_PACight1_PACAP38_A10_A10_010.fcs	HEK293_PACight1_PACAP38_A10_A10_010.fcs	stable_HEK293_PAClight1_10	stable_HEK293_PAClight1	10	300	3251.28
HEK293_PACight1_PACAP38_A10_A10_010.fcs	HEK293_PACight1_PACAP38_A10_A10_010.fcs	stable_HEK293_PAClight1_10	stable_HEK293_PAClight1	10	300	3629.4
HEK293_PACight1_PACAP38_A10_A10_010.fcs	HEK293_PACight1_PACAP38_A10_A10_010.fcs	stable_HEK293_PAClight1_10	stable_HEK293_PAClight1	10	300	6937.26
HEK293_PACight1_PACAP38_A10_A10_010.fcs	HEK293_PACight1_PACAP38_A10_A10_010.fcs	stable_HEK293_PAClight1_10	stable_HEK293_PAClight1	10	300	5364.06
HEK293_PACight1_PACAP38_A10_A10_010.fcs	HEK293_PACight1_PACAP38_A10_A10_010.fcs	stable_HEK293_PAClight1_10	stable_HEK293_PAClight1	10	300	8642.94
HEK293_PACight1_PACAP38_A10_A10_010.fcs	HEK293_PACight1_PACAP38_A10_A10_010.fcs	stable_HEK293_PAClight1_10	stable_HEK293_PAClight1	10	300	3512.1
HEK293_PACight1_PACAP38_A10_A10_010.fcs	HEK293_PACight1_PACAP38_A10_A10_010.fcs	stable_HEK293_PAClight1_10	stable_HEK293_PAClight1	10	300	7605.18
HEK293_PACight1_PACAP38_A10_A10_010.fcs	HEK293_PACight1_PACAP38_A10_A10_010.fcs	stable_HEK293_PAClight1_10	stable_HEK293_PAClight1	10	300	3717.72
HEK293_PACight1_PACAP38_A10_A10_010.fcs	HEK293_PACight1_PACAP38_A10_A10_010.fcs	stable_HEK293_PAClight1_10	stable_HEK293_PAClight1	10	300	4006.14
HEK293_PACight1_PACAP38_A10_A10_010.fcs	HEK293_PACight1_PACAP38_A10_A10_010.fcs	stable_HEK293_PAClight1_10	stable_HEK293_PAClight1	10	300	3985.44
HEK293_PACight1_PACAP38_A10_A10_010.fcs	HEK293_PACight1_PACAP38_A10_A10_010.fcs	stable_HEK293_PAClight1_10	stable_HEK293_PAClight1	10	300	17091.3
HEK293_PACight1_PACAP38_A10_A10_010.fcs	HEK293_PACight1_PACAP38_A10_A10_010.fcs	stable_HEK293_PAClight1_10	stable_HEK293_PAClight1	10	300	2427.42
HEK293_PACight1_PACAP38_A10_A10_010.fcs	HEK293_PACight1_PACAP38_A10_A10_010.fcs	stable_HEK293_PAClight1_10	stable_HEK293_PAClight1	10	300	8039.88
HEK293_PACight1_PACAP38_A10_A10_010.fcs	HEK293_PACight1_PACAP38_A10_A10_010.fcs	stable_HEK293_PAClight1_10	stable_HEK293_PAClight1	10	300	2453.64
HEK293_PACight1_PACAP38_A10_A10_010.fcs	HEK293_PACight1_PACAP38_A10_A10_010.fcs	stable_HEK293_PAClight1_10	stable_HEK293_PAClight1	10	300	2606.82
HEK293_PACight1_PACAP38_A10_A10_010.fcs	HEK293_PACight1_PACAP38_A10_A10_010.fcs	stable_HEK293_PAClight1_10	stable_HEK293_PAClight1	10	300	8670.54
HEK293_PACight1_PACAP38_A10_A10_010.fcs	HEK293_PACight1_PACAP38_A10_A10_010.fcs	stable_HEK293_PAClight1_10	stable_HEK293_PAClight1	10	300	12003.2
HEK293_PACight1_PACAP38_A10_A10_010.fcs	HEK293_PACight1_PACAP38_A10_A10_010.fcs	stable_HEK293_PAClight1_10	stable_HEK293_PAClight1	10	300	14334.1
HEK293_PACight1_PACAP38_A10_A10_010.fcs	HEK293_PACight1_PACAP38_A10_A10_010.fcs	stable_HEK293_PAClight1_10	stable_HEK293_PAClight1	10	300	3136.74
HEK293_PACight1_PACAP38_A10_A10_010.fcs	HEK293_PACight1_PACAP38_A10_A10_010.fcs	stable_HEK293_PAClight1_10	stable_HEK293_PAClight1	10	300	2528.16
HEK293_PACight1_PACAP38_A10_A10_010.fcs	HEK293_PACight1_PACAP38_A10_A10_010.fcs	stable_HEK293_PAClight1_10	stable_HEK293_PAClight1	10	300	7561.02
HEK293_PACight1_PACAP38_A10_A10_010.fcs	HEK293_PACight1_PACAP38_A10_A10_010.fcs	stable_HEK293_PAClight1_10	stable_HEK293_PAClight1	10	300	5045.28
HEK293_PACight1_PACAP38_A10_A10_010.fcs	HEK293_PACight1_PACAP38_A10_A10_010.fcs	stable_HEK293_PAClight1_10	stable_HEK293_PAClight1	10	300	6517.74
HEK293_PACight1_PACAP38_A10_A10_010.fcs	HEK293_PACight1_PACAP38_A10_A10_010.fcs	stable_HEK293_PAClight1_10	stable_HEK293_PAClight1	10	300	465.06
HEK293_PACight1_PACAP38_A10_A10_010.fcs	HEK293_PACight1_PACAP38_A10_A10_010.fcs	stable_HEK293_PAClight1_10	stable_HEK293_PAClight1	10	300	6710.94
HEK293_PACight1_PACAP38_A10_A10_010.fcs	HEK293_PACight1_PACAP38_A10_A10_010.fcs	stable_HEK293_PAClight1_10	stable_HEK293_PAClight1	10	300	1589.76
HEK293_PACight1_PACAP38_A10_A10_010.fcs	HEK293_PACight1_PACAP38_A10_A10_010.fcs	stable_HEK293_PAClight1_10	stable_HEK293_PAClight1	10	300	7247.76
HEK293_PACight1_PACAP38_A10_A10_010.fcs	HEK293_PACight1_PACAP38_A10_A10_010.fcs	stable_HEK293_PAClight1_10	stable_HEK293_PAClight1	10	300	934.26
HEK293_PACight1_PACAP38_A10_A10_010.fcs	HEK293_PACight1_PACAP38_A10_A10_010.fcs	stable_HEK293_PAClight1_10	stable_HEK293_PAClight1	10	300	3485.88
HEK293_PACight1_PACAP38_A10_A10_010.fcs	HEK293_PACight1_PACAP38_A10_A10_010.fcs	stable_HEK293_PAClight1_10	stable_HEK293_PAClight1	10	300	3385.14
HEK293_PACight1_PACAP38_A10_A10_010.fcs	HEK293_PACight1_PACAP38_A10_A10_010.fcs	stable_HEK293_PAClight1_10	stable_HEK293_PAClight1	10	300	8275.86
HEK293_PACight1_PACAP38_A10_A10_010.fcs	HEK293_PACight1_PACAP38_A10_A10_010.fcs	stable_HEK293_PAClight1_10	stable_HEK293_PAClight1	10	300	5513.1
HEK293_PACight1_PACAP38_A10_A10_010.fcs	HEK293_PACight1_PACAP38_A10_A10_010.fcs	stable_HEK293_PAClight1_10	stable_HEK293_PAClight1	10	300	2695.14
HEK293_PACight1_PACAP38_A10_A10_010.fcs	HEK293_PACight1_PACAP38_A10_A10_010.fcs	stable_HEK293_PAClight1_10	stable_HEK293_PAClight1	10	300	14578.3
HEK293_PACight1_PACAP38_A10_A10_010.fcs	HEK293_PACight1_PACAP38_A10_A10_010.fcs	stable_HEK293_PAClight1_10	stable_HEK293_PAClight1	10	300	9933.24
HEK293_PACight1_PACAP38_A10_A10_010.fcs	HEK293_PACight1_PACAP38_A10_A10_010.fcs	stable_HEK293_PAClight1_10	stable_HEK293_PAClight1	10	300	5506.2
HEK293_PACight1_PACAP38_A10_A10_010.fcs	HEK293_PACight1_PACAP38_A10_A10_010.fcs	stable_HEK293_PAClight1_10	stable_HEK293_PAClight1	10	300	2827.62
HEK293_PACight1_PACAP38_A10_A10_010.fcs	HEK293_PACight1_PACAP38_A10_A10_010.fcs	stable_HEK293_PAClight1_10	stable_HEK293_PAClight1	10	300	2918.7
HEK293_PACight1_PACAP38_A10_A10_010.fcs	HEK293_PACight1_PACAP38_A10_A10_010.fcs	stable_HEK293_PAClight1_10	stable_HEK293_PAClight1	10	300	3109.14
HEK293_PACight1_PACAP38_A10_A10_010.fcs	HEK293_PACight1_PACAP38_A10_A10_010.fcs	stable_HEK293_PAClight1_10	stable_HEK293_PAClight1	10	300	6187.92
HEK293_PACight1_PACAP38_A10_A10_010.fcs	HEK293_PACight1_PACAP38_A10_A10_010.fcs	stable_HEK293_PAClight1_10	stable_HEK293_PAClight1	10	300	3586.62
HEK293_PACight1_PACAP38_A10_A10_010.fcs	HEK293_PACight1_PACAP38_A10_A10_010.fcs	stable_HEK293_PAClight1_10	stable_HEK293_PAClight1	10	300	2383.26
HEK293_PACight1_PACAP38_A10_A10_010.fcs	HEK293_PACight1_PACAP38_A10_A10_010.fcs	stable_HEK293_PAClight1_10	stable_HEK293_PAClight1	10	300	9435.06
HEK293_PACight1_PACAP38_A10_A10_010.fcs	HEK293_PACight1_PACAP38_A10_A10_010.fcs	stable_HEK293_PAClight1_10	stable_HEK293_PAClight1	10	300	25309.2
HEK293_PACight1_PACAP38_A10_A10_010.fcs	HEK293_PACight1_PACAP38_A10_A10_010.fcs	stable_HEK293_PAClight1_10	stable_HEK293_PAClight1	10	300	8361.42
HEK293_PACight1_PACAP38_A10_A10_010.fcs	HEK293_PACight1_PACAP38_A10_A10_010.fcs	stable_HEK293_PAClight1_10	stable_HEK293_PAClight1	10	300	16249.5
HEK293_PACight1_PACAP38_A10_A10_010.fcs	HEK293_PACight1_PACAP38_A10_A10_010.fcs	stable_HEK293_PAClight1_10	stable_HEK293_PAClight1	10	300	6132.72
HEK293_PACight1_PACAP38_A10_A10_010.fcs	HEK293_PACight1_PACAP38_A10_A10_010.fcs	stable_HEK293_PAClight1_10	stable_HEK293_PAClight1	10	300	4861.74
HEK293_PACight1_PACAP38_A10_A10_010.fcs	HEK293_PACight1_PACAP38_A10_A10_010.fcs	stable_HEK293_PAClight1_10	stable_HEK293_PAClight1	10	300	2991.84
HEK293_PACight1_PACAP38_A10_A10_010.fcs	HEK293_PACight1_PACAP38_A10_A10_010.fcs	stable_HEK293_PAClight1_10	stable_HEK293_PAClight1	10	300	3237.48
HEK293_PACight1_PACAP38_A10_A10_010.fcs	HEK293_PACight1_PACAP38_A10_A10_010.fcs	stable_HEK293_PAClight1_10	stable_HEK293_PAClight1	10	300	44.16
HEK293_PACight1_PACAP38_A10_A10_010.fcs	HEK293_PACight1_PACAP38_A10_A10_010.fcs	stable_HEK293_PAClight1_10	stable_HEK293_PAClight1	10	300	9469.56
HEK293_PACight1_PACAP38_A10_A10_010.fcs	HEK293_PACight1_PACAP38_A10_A10_010.fcs	stable_HEK293_PAClight1_10	stable_HEK293_PAClight1	10	300	2954.58
HEK293_PACight1_PACAP38_A10_A10_010.fcs	HEK293_PACight1_PACAP38_A10_A10_010.fcs	stable_HEK293_PAClight1_10	stable_HEK293_PAClight1	10	300	2328.06
HEK293_PACight1_PACAP38_A10_A10_010.fcs	HEK293_PACight1_PACAP38_A10_A10_010.fcs	stable_HEK293_PAClight1_10	stable_HEK293_PAClight1	10	300	5137.74
HEK293_PACight1_PACAP38_A10_A10_010.fcs	HEK293_PACight1_PACAP38_A10_A10_010.fcs	stable_HEK293_PAClight1_10	stable_HEK293_PAClight1	10	300	5936.76
HEK293_PACight1_PACAP38_A10_A10_010.fcs	HEK293_PACight1_PACAP38_A10_A10_010.fcs	stable_HEK293_PAClight1_10	stable_HEK293_PAClight1	10	300	3668.04
HEK293_PACight1_PACAP38_A10_A10_010.fcs	HEK293_PACight1_PACAP38_A10_A10_010.fcs	stable_HEK293_PAClight1_10	stable_HEK293_PAClight1	10	300	2655.12
HEK293_PACight1_PACAP38_A10_A10_010.fcs	HEK293_PACight1_PACAP38_A10_A10_010.fcs	stable_HEK293_PAClight1_10	stable_HEK293_PAClight1	10	300	10855.1
HEK293_PACight1_PACAP38_A10_A10_010.fcs	HEK293_PACight1_PACAP38_A10_A10_010.fcs	stable_HEK293_PAClight1_10	stable_HEK293_PAClight1	10	300	6741.3
HEK293_PACight1_PACAP38_A10_A10_010.fcs	HEK293_PACight1_PACAP38_A10_A10_010.fcs	stable_HEK293_PAClight1_10	stable_HEK293_PAClight1	10	300	3786.72
HEK293_PACight1_PACAP38_A10_A10_010.fcs	HEK293_PACight1_PACAP38_A10_A10_010.fcs	stable_HEK293_PAClight1_10	stable_HEK293_PAClight1	10	300	761.76
HEK293_PACight1_PACAP38_A10_A10_010.fcs	HEK293_PACight1_PACAP38_A10_A10_010.fcs	stable_HEK293_PAClight1_10	stable_HEK293_PAClight1	10	300	16779.4
HEK293_PACight1_PACAP38_A10_A10_010.fcs	HEK293_PACight1_PACAP38_A10_A10_010.fcs	stable_HEK293_PAClight1_10	stable_HEK293_PAClight1	10	300	572.7
HEK293_PACight1_PACAP38_A10_A10_010.fcs	HEK293_PACight1_PACAP38_A10_A10_010.fcs	stable_HEK293_PAClight1_10	stable_HEK293_PAClight1	10	300	6396.3
HEK293_PACight1_PACAP38_A10_A10_010.fcs	HEK293_PACight1_PACAP38_A10_A10_010.fcs	stable_HEK293_PAClight1_10	stable_HEK293_PAClight1	10	300	4186.92
HEK293_PACight1_PACAP38_A10_A10_010.fcs	HEK293_PACight1_PACAP38_A10_A10_010.fcs	stable_HEK293_PAClight1_10	stable_HEK293_PAClight1	10	300	34272.3
HEK293_PACight1_PACAP38_A10_A10_010.fcs	HEK293_PACight1_PACAP38_A10_A10_010.fcs	stable_HEK293_PAClight1_10	stable_HEK293_PAClight1	10	300	281.52
HEK293_PACight1_PACAP38_A10_A10_010.fcs	HEK293_PACight1_PACAP38_A10_A10_010.fcs	stable_HEK293_PAClight1_10	stable_HEK293_PAClight1	10	300	3260.94
HEK293_PACight1_PACAP38_A10_A10_010.fcs	HEK293_PACight1_PACAP38_A10_A10_010.fcs	stable_HEK293_PAClight1_10	stable_HEK293_PAClight1	10	300	186.3
HEK293_PACight1_PACAP38_A10_A10_010.fcs	HEK293_PACight1_PACAP38_A10_A10_010.fcs	stable_HEK293_PAClight1_10	stable_HEK293_PAClight1	10	300	5057.7
HEK293_PACight1_PACAP38_A10_A10_010.fcs	HEK293_PACight1_PACAP38_A10_A10_010.fcs	stable_HEK293_PAClight1_10	stable_HEK293_PAClight1	10	300	1745.7
HEK293_PACight1_PACAP38_A10_A10_010.fcs	HEK293_PACight1_PACAP38_A10_A10_010.fcs	stable_HEK293_PAClight1_10	stable_HEK293_PAClight1	10	300	8934.12
HEK293_PACight1_PACAP38_A10_A10_010.fcs	HEK293_PACight1_PACAP38_A10_A10_010.fcs	stable_HEK293_PAClight1_10	stable_HEK293_PAClight1	10	300	1615.98
HEK293_PACight1_PACAP38_A10_A10_010.fcs	HEK293_PACight1_PACAP38_A10_A10_010.fcs	stable_HEK293_PAClight1_10	stable_HEK293_PAClight1	10	300	972.9
HEK293_PACight1_PACAP38_A10_A10_010.fcs	HEK293_PACight1_PACAP38_A10_A10_010.fcs	stable_HEK293_PAClight1_10	stable_HEK293_PAClight1	10	300	1766.4
HEK293_PACight1_PACAP38_A10_A10_010.fcs	HEK293_PACight1_PACAP38_A10_A10_010.fcs	stable_HEK293_PAClight1_10	stable_HEK293_PAClight1	10	300	12264.1
HEK293_PACight1_PACAP38_A10_A10_010.fcs	HEK293_PACight1_PACAP38_A10_A10_010.fcs	stable_HEK293_PAClight1_10	stable_HEK293_PAClight1	10	300	6543.96
HEK293_PACight1_PACAP38_A10_A10_010.fcs	HEK293_PACight1_PACAP38_A10_A10_010.fcs	stable_HEK293_PAClight1_10	stable_HEK293_PAClight1	10	300	949.44
HEK293_PACight1_PACAP38_A10_A10_010.fcs	HEK293_PACight1_PACAP38_A10_A10_010.fcs	stable_HEK293_PAClight1_10	stable_HEK293_PAClight1	10	300	5787.72
HEK293_PACight1_PACAP38_A10_A10_010.fcs	HEK293_PACight1_PACAP38_A10_A10_010.fcs	stable_HEK293_PAClight1_10	stable_HEK293_PAClight1	10	300	2056.2
HEK293_PACight1_PACAP38_A10_A10_010.fcs	HEK293_PACight1_PACAP38_A10_A10_010.fcs	stable_HEK293_PAClight1_10	stable_HEK293_PAClight1	10	300	3145.02
HEK293_PACight1_PACAP38_A10_A10_010.fcs	HEK293_PACight1_PACAP38_A10_A10_010.fcs	stable_HEK293_PAClight1_10	stable_HEK293_PAClight1	10	300	2308.74
HEK293_PACight1_PACAP38_A10_A10_010.fcs	HEK293_PACight1_PACAP38_A10_A10_010.fcs	stable_HEK293_PAClight1_10	stable_HEK293_PAClight1	10	300	12617.3
HEK293_PACight1_PACAP38_A10_A10_010.fcs	HEK293_PACight1_PACAP38_A10_A10_010.fcs	stable_HEK293_PAClight1_10	stable_HEK293_PAClight1	10	300	9114.9
HEK293_PACight1_PACAP38_A10_A10_010.fcs	HEK293_PACight1_PACAP38_A10_A10_010.fcs	stable_HEK293_PAClight1_10	stable_HEK293_PAClight1	10	300	3823.98
HEK293_PACight1_PACAP38_A10_A10_010.fcs	HEK293_PACight1_PACAP38_A10_A10_010.fcs	stable_HEK293_PAClight1_10	stable_HEK293_PAClight1	10	300	404.34
HEK293_PACight1_PACAP38_A10_A10_010.fcs	HEK293_PACight1_PACAP38_A10_A10_010.fcs	stable_HEK293_PAClight1_10	stable_HEK293_PAClight1	10	300	4839.66
HEK293_PACight1_PACAP38_A10_A10_010.fcs	HEK293_PACight1_PACAP38_A10_A10_010.fcs	stable_HEK293_PAClight1_10	stable_HEK293_PAClight1	10	300	201.48
HEK293_PACight1_PACAP38_A10_A10_010.fcs	HEK293_PACight1_PACAP38_A10_A10_010.fcs	stable_HEK293_PAClight1_10	stable_HEK293_PAClight1	10	300	7809.42
HEK293_PACight1_PACAP38_A10_A10_010.fcs	HEK293_PACight1_PACAP38_A10_A10_010.fcs	stable_HEK293_PAClight1_10	stable_HEK293_PAClight1	10	300	6237.6
HEK293_PACight1_PACAP38_A10_A10_010.fcs	HEK293_PACight1_PACAP38_A10_A10_010.fcs	stable_HEK293_PAClight1_10	stable_HEK293_PAClight1	10	300	1722.24
HEK293_PACight1_PACAP38_A10_A10_010.fcs	HEK293_PACight1_PACAP38_A10_A10_010.fcs	stable_HEK293_PAClight1_10	stable_HEK293_PAClight1	10	300	2386.02
HEK293_PACight1_PACAP38_A10_A10_010.fcs	HEK293_PACight1_PACAP38_A10_A10_010.fcs	stable_HEK293_PAClight1_10	stable_HEK293_PAClight1	10	300	4562.28
HEK293_PACight1_PACAP38_A10_A10_010.fcs	HEK293_PACight1_PACAP38_A10_A10_010.fcs	stable_HEK293_PAClight1_10	stable_HEK293_PAClight1	10	300	3033.24
HEK293_PACight1_PACAP38_A10_A10_010.fcs	HEK293_PACight1_PACAP38_A10_A10_010.fcs	stable_HEK293_PAClight1_10	stable_HEK293_PAClight1	10	300	3610.08
HEK293_PACight1_PACAP38_A10_A10_010.fcs	HEK293_PACight1_PACAP38_A10_A10_010.fcs	stable_HEK293_PAClight1_10	stable_HEK293_PAClight1	10	300	2482.62
HEK293_PACight1_PACAP38_A10_A10_010.fcs	HEK293_PACight1_PACAP38_A10_A10_010.fcs	stable_HEK293_PAClight1_10	stable_HEK293_PAClight1	10	300	2155.56
HEK293_PACight1_PACAP38_A10_A10_010.fcs	HEK293_PACight1_PACAP38_A10_A10_010.fcs	stable_HEK293_PAClight1_10	stable_HEK293_PAClight1	10	300	6131.34
HEK293_PACight1_PACAP38_A10_A10_010.fcs	HEK293_PACight1_PACAP38_A10_A10_010.fcs	stable_HEK293_PAClight1_10	stable_HEK293_PAClight1	10	300	948.06
HEK293_PACight1_PACAP38_A10_A10_010.fcs	HEK293_PACight1_PACAP38_A10_A10_010.fcs	stable_HEK293_PAClight1_10	stable_HEK293_PAClight1	10	300	4352.52
HEK293_PACight1_PACAP38_A10_A10_010.fcs	HEK293_PACight1_PACAP38_A10_A10_010.fcs	stable_HEK293_PAClight1_10	stable_HEK293_PAClight1	10	300	7373.34
HEK293_PACight1_PACAP38_A10_A10_010.fcs	HEK293_PACight1_PACAP38_A10_A10_010.fcs	stable_HEK293_PAClight1_10	stable_HEK293_PAClight1	10	300	4407.72
HEK293_PACight1_PACAP38_A10_A10_010.fcs	HEK293_PACight1_PACAP38_A10_A10_010.fcs	stable_HEK293_PAClight1_10	stable_HEK293_PAClight1	10	300	1810.56
HEK293_PACight1_PACAP38_A10_A10_010.fcs	HEK293_PACight1_PACAP38_A10_A10_010.fcs	stable_HEK293_PAClight1_10	stable_HEK293_PAClight1	10	300	4627.14
HEK293_PACight1_PACAP38_A10_A10_010.fcs	HEK293_PACight1_PACAP38_A10_A10_010.fcs	stable_HEK293_PAClight1_10	stable_HEK293_PAClight1	10	300	155.94
HEK293_PACight1_PACAP38_A10_A10_010.fcs	HEK293_PACight1_PACAP38_A10_A10_010.fcs	stable_HEK293_PAClight1_10	stable_HEK293_PAClight1	10	300	5629.02
HEK293_PACight1_PACAP38_A10_A10_010.fcs	HEK293_PACight1_PACAP38_A10_A10_010.fcs	stable_HEK293_PAClight1_10	stable_HEK293_PAClight1	10	300	4645.08
HEK293_PACight1_PACAP38_A10_A10_010.fcs	HEK293_PACight1_PACAP38_A10_A10_010.fcs	stable_HEK293_PAClight1_10	stable_HEK293_PAClight1	10	300	5968.5
HEK293_PACight1_PACAP38_A10_A10_010.fcs	HEK293_PACight1_PACAP38_A10_A10_010.fcs	stable_HEK293_PAClight1_10	stable_HEK293_PAClight1	10	300	3212.64
HEK293_PACight1_PACAP38_A10_A10_010.fcs	HEK293_PACight1_PACAP38_A10_A10_010.fcs	stable_HEK293_PAClight1_10	stable_HEK293_PAClight1	10	300	5324.04
HEK293_PACight1_PACAP38_A10_A10_010.fcs	HEK293_PACight1_PACAP38_A10_A10_010.fcs	stable_HEK293_PAClight1_10	stable_HEK293_PAClight1	10	300	7264.32
HEK293_PACight1_PACAP38_A10_A10_010.fcs	HEK293_PACight1_PACAP38_A10_A10_010.fcs	stable_HEK293_PAClight1_10	stable_HEK293_PAClight1	10	300	284.28
HEK293_PACight1_PACAP38_A10_A10_010.fcs	HEK293_PACight1_PACAP38_A10_A10_010.fcs	stable_HEK293_PAClight1_10	stable_HEK293_PAClight1	10	300	4709.94
HEK293_PACight1_PACAP38_A10_A10_010.fcs	HEK293_PACight1_PACAP38_A10_A10_010.fcs	stable_HEK293_PAClight1_10	stable_HEK293_PAClight1	10	300	3588
HEK293_PACight1_PACAP38_A10_A10_010.fcs	HEK293_PACight1_PACAP38_A10_A10_010.fcs	stable_HEK293_PAClight1_10	stable_HEK293_PAClight1	10	300	4818.96
HEK293_PACight1_PACAP38_A10_A10_010.fcs	HEK293_PACight1_PACAP38_A10_A10_010.fcs	stable_HEK293_PAClight1_10	stable_HEK293_PAClight1	10	300	994.98
HEK293_PACight1_PACAP38_A10_A10_010.fcs	HEK293_PACight1_PACAP38_A10_A10_010.fcs	stable_HEK293_PAClight1_10	stable_HEK293_PAClight1	10	300	1940.28
HEK293_PACight1_PACAP38_A10_A10_010.fcs	HEK293_PACight1_PACAP38_A10_A10_010.fcs	stable_HEK293_PAClight1_10	stable_HEK293_PAClight1	10	300	2372.22
HEK293_PACight1_PACAP38_A10_A10_010.fcs	HEK293_PACight1_PACAP38_A10_A10_010.fcs	stable_HEK293_PAClight1_10	stable_HEK293_PAClight1	10	300	6109.26
HEK293_PACight1_PACAP38_A10_A10_010.fcs	HEK293_PACight1_PACAP38_A10_A10_010.fcs	stable_HEK293_PAClight1_10	stable_HEK293_PAClight1	10	300	5375.1
HEK293_PACight1_PACAP38_A10_A10_010.fcs	HEK293_PACight1_PACAP38_A10_A10_010.fcs	stable_HEK293_PAClight1_10	stable_HEK293_PAClight1	10	300	1058.46
HEK293_PACight1_PACAP38_A10_A10_010.fcs	HEK293_PACight1_PACAP38_A10_A10_010.fcs	stable_HEK293_PAClight1_10	stable_HEK293_PAClight1	10	300	2689.62
HEK293_PACight1_PACAP38_A10_A10_010.fcs	HEK293_PACight1_PACAP38_A10_A10_010.fcs	stable_HEK293_PAClight1_10	stable_HEK293_PAClight1	10	300	5017.68
HEK293_PACight1_PACAP38_A10_A10_010.fcs	HEK293_PACight1_PACAP38_A10_A10_010.fcs	stable_HEK293_PAClight1_10	stable_HEK293_PAClight1	10	300	5439.96
HEK293_PACight1_PACAP38_A10_A10_010.fcs	HEK293_PACight1_PACAP38_A10_A10_010.fcs	stable_HEK293_PAClight1_10	stable_HEK293_PAClight1	10	300	6113.4
HEK293_PACight1_PACAP38_A10_A10_010.fcs	HEK293_PACight1_PACAP38_A10_A10_010.fcs	stable_HEK293_PAClight1_10	stable_HEK293_PAClight1	10	300	2899.38
HEK293_PACight1_PACAP38_A10_A10_010.fcs	HEK293_PACight1_PACAP38_A10_A10_010.fcs	stable_HEK293_PAClight1_10	stable_HEK293_PAClight1	10	300	166.98
HEK293_PACight1_PACAP38_A10_A10_010.fcs	HEK293_PACight1_PACAP38_A10_A10_010.fcs	stable_HEK293_PAClight1_10	stable_HEK293_PAClight1	10	300	5945.04
HEK293_PACight1_PACAP38_A10_A10_010.fcs	HEK293_PACight1_PACAP38_A10_A10_010.fcs	stable_HEK293_PAClight1_10	stable_HEK293_PAClight1	10	300	3904.02
HEK293_PACight1_PACAP38_A10_A10_010.fcs	HEK293_PACight1_PACAP38_A10_A10_010.fcs	stable_HEK293_PAClight1_10	stable_HEK293_PAClight1	10	300	760.38
HEK293_PACight1_PACAP38_A10_A10_010.fcs	HEK293_PACight1_PACAP38_A10_A10_010.fcs	stable_HEK293_PAClight1_10	stable_HEK293_PAClight1	10	300	6201.72
HEK293_PACight1_PACAP38_A10_A10_010.fcs	HEK293_PACight1_PACAP38_A10_A10_010.fcs	stable_HEK293_PAClight1_10	stable_HEK293_PAClight1	10	300	4240.74
HEK293_PACight1_PACAP38_A10_A10_010.fcs	HEK293_PACight1_PACAP38_A10_A10_010.fcs	stable_HEK293_PAClight1_10	stable_HEK293_PAClight1	10	300	564.42
HEK293_PACight1_PACAP38_A10_A10_010.fcs	HEK293_PACight1_PACAP38_A10_A10_010.fcs	stable_HEK293_PAClight1_10	stable_HEK293_PAClight1	10	300	5978.16
HEK293_PACight1_PACAP38_A10_A10_010.fcs	HEK293_PACight1_PACAP38_A10_A10_010.fcs	stable_HEK293_PAClight1_10	stable_HEK293_PAClight1	10	300	10494.9
HEK293_PACight1_PACAP38_A10_A10_010.fcs	HEK293_PACight1_PACAP38_A10_A10_010.fcs	stable_HEK293_PAClight1_10	stable_HEK293_PAClight1	10	300	11314.6
HEK293_PACight1_PACAP38_A10_A10_010.fcs	HEK293_PACight1_PACAP38_A10_A10_010.fcs	stable_HEK293_PAClight1_10	stable_HEK293_PAClight1	10	300	6978.66
HEK293_PACight1_PACAP38_A10_A10_010.fcs	HEK293_PACight1_PACAP38_A10_A10_010.fcs	stable_HEK293_PAClight1_10	stable_HEK293_PAClight1	10	300	1392.42
HEK293_PACight1_PACAP38_A10_A10_010.fcs	HEK293_PACight1_PACAP38_A10_A10_010.fcs	stable_HEK293_PAClight1_10	stable_HEK293_PAClight1	10	300	1627.02
HEK293_PACight1_PACAP38_A10_A10_010.fcs	HEK293_PACight1_PACAP38_A10_A10_010.fcs	stable_HEK293_PAClight1_10	stable_HEK293_PAClight1	10	300	4489.14
HEK293_PACight1_PACAP38_A10_A10_010.fcs	HEK293_PACight1_PACAP38_A10_A10_010.fcs	stable_HEK293_PAClight1_10	stable_HEK293_PAClight1	10	300	2811.06
HEK293_PACight1_PACAP38_A10_A10_010.fcs	HEK293_PACight1_PACAP38_A10_A10_010.fcs	stable_HEK293_PAClight1_10	stable_HEK293_PAClight1	10	300	5241.24
HEK293_PACight1_PACAP38_A10_A10_010.fcs	HEK293_PACight1_PACAP38_A10_A10_010.fcs	stable_HEK293_PAClight1_10	stable_HEK293_PAClight1	10	300	2791.74
HEK293_PACight1_PACAP38_A10_A10_010.fcs	HEK293_PACight1_PACAP38_A10_A10_010.fcs	stable_HEK293_PAClight1_10	stable_HEK293_PAClight1	10	300	385.02
HEK293_PACight1_PACAP38_A10_A10_010.fcs	HEK293_PACight1_PACAP38_A10_A10_010.fcs	stable_HEK293_PAClight1_10	stable_HEK293_PAClight1	10	300	6967.62
HEK293_PACight1_PACAP38_A10_A10_010.fcs	HEK293_PACight1_PACAP38_A10_A10_010.fcs	stable_HEK293_PAClight1_10	stable_HEK293_PAClight1	10	300	4002
HEK293_PACight1_PACAP38_A10_A10_010.fcs	HEK293_PACight1_PACAP38_A10_A10_010.fcs	stable_HEK293_PAClight1_10	stable_HEK293_PAClight1	10	300	1644.96
HEK293_PACight1_PACAP38_A10_A10_010.fcs	HEK293_PACight1_PACAP38_A10_A10_010.fcs	stable_HEK293_PAClight1_10	stable_HEK293_PAClight1	10	300	4149.66
HEK293_PACight1_PACAP38_A10_A10_010.fcs	HEK293_PACight1_PACAP38_A10_A10_010.fcs	stable_HEK293_PAClight1_10	stable_HEK293_PAClight1	10	300	14964.7
HEK293_PACight1_PACAP38_A10_A10_010.fcs	HEK293_PACight1_PACAP38_A10_A10_010.fcs	stable_HEK293_PAClight1_10	stable_HEK293_PAClight1	10	300	9048.66
HEK293_PACight1_PACAP38_A10_A10_010.fcs	HEK293_PACight1_PACAP38_A10_A10_010.fcs	stable_HEK293_PAClight1_10	stable_HEK293_PAClight1	10	300	3701.16
HEK293_PACight1_PACAP38_A10_A10_010.fcs	HEK293_PACight1_PACAP38_A10_A10_010.fcs	stable_HEK293_PAClight1_10	stable_HEK293_PAClight1	10	300	7040.76
HEK293_PACight1_PACAP38_A10_A10_010.fcs	HEK293_PACight1_PACAP38_A10_A10_010.fcs	stable_HEK293_PAClight1_10	stable_HEK293_PAClight1	10	300	293.94
HEK293_PACight1_PACAP38_A10_A10_010.fcs	HEK293_PACight1_PACAP38_A10_A10_010.fcs	stable_HEK293_PAClight1_10	stable_HEK293_PAClight1	10	300	4856.22
HEK293_PACight1_PACAP38_A10_A10_010.fcs	HEK293_PACight1_PACAP38_A10_A10_010.fcs	stable_HEK293_PAClight1_10	stable_HEK293_PAClight1	10	300	1065.36
HEK293_PACight1_PACAP38_A10_A10_010.fcs	HEK293_PACight1_PACAP38_A10_A10_010.fcs	stable_HEK293_PAClight1_10	stable_HEK293_PAClight1	10	300	5942.28
HEK293_PACight1_PACAP38_A10_A10_010.fcs	HEK293_PACight1_PACAP38_A10_A10_010.fcs	stable_HEK293_PAClight1_10	stable_HEK293_PAClight1	10	300	4202.1
HEK293_PACight1_PACAP38_A10_A10_010.fcs	HEK293_PACight1_PACAP38_A10_A10_010.fcs	stable_HEK293_PAClight1_10	stable_HEK293_PAClight1	10	300	874.92
HEK293_PACight1_PACAP38_A10_A10_010.fcs	HEK293_PACight1_PACAP38_A10_A10_010.fcs	stable_HEK293_PAClight1_10	stable_HEK293_PAClight1	10	300	3346.5
HEK293_PACight1_PACAP38_A10_A10_010.fcs	HEK293_PACight1_PACAP38_A10_A10_010.fcs	stable_HEK293_PAClight1_10	stable_HEK293_PAClight1	10	300	138
HEK293_PACight1_PACAP38_A10_A10_010.fcs	HEK293_PACight1_PACAP38_A10_A10_010.fcs	stable_HEK293_PAClight1_10	stable_HEK293_PAClight1	10	300	3113.28
HEK293_PACight1_PACAP38_A10_A10_010.fcs	HEK293_PACight1_PACAP38_A10_A10_010.fcs	stable_HEK293_PAClight1_10	stable_HEK293_PAClight1	10	300	4556.76
HEK293_PACight1_PACAP38_A10_A10_010.fcs	HEK293_PACight1_PACAP38_A10_A10_010.fcs	stable_HEK293_PAClight1_10	stable_HEK293_PAClight1	10	300	3109.14
HEK293_PACight1_PACAP38_A10_A10_010.fcs	HEK293_PACight1_PACAP38_A10_A10_010.fcs	stable_HEK293_PAClight1_10	stable_HEK293_PAClight1	10	300	5671.8
HEK293_PACight1_PACAP38_A10_A10_010.fcs	HEK293_PACight1_PACAP38_A10_A10_010.fcs	stable_HEK293_PAClight1_10	stable_HEK293_PAClight1	10	300	2899.38
HEK293_PACight1_PACAP38_A10_A10_010.fcs	HEK293_PACight1_PACAP38_A10_A10_010.fcs	stable_HEK293_PAClight1_10	stable_HEK293_PAClight1	10	300	444.36
HEK293_PACight1_PACAP38_A10_A10_010.fcs	HEK293_PACight1_PACAP38_A10_A10_010.fcs	stable_HEK293_PAClight1_10	stable_HEK293_PAClight1	10	300	8772.66
HEK293_PACight1_PACAP38_A10_A10_010.fcs	HEK293_PACight1_PACAP38_A10_A10_010.fcs	stable_HEK293_PAClight1_10	stable_HEK293_PAClight1	10	300	18164.9
HEK293_PACight1_PACAP38_A10_A10_010.fcs	HEK293_PACight1_PACAP38_A10_A10_010.fcs	stable_HEK293_PAClight1_10	stable_HEK293_PAClight1	10	300	2132.1
HEK293_PACight1_PACAP38_A10_A10_010.fcs	HEK293_PACight1_PACAP38_A10_A10_010.fcs	stable_HEK293_PAClight1_10	stable_HEK293_PAClight1	10	300	5332.32
HEK293_PACight1_PACAP38_A10_A10_010.fcs	HEK293_PACight1_PACAP38_A10_A10_010.fcs	stable_HEK293_PAClight1_10	stable_HEK293_PAClight1	10	300	4335.96
HEK293_PACight1_PACAP38_A10_A10_010.fcs	HEK293_PACight1_PACAP38_A10_A10_010.fcs	stable_HEK293_PAClight1_10	stable_HEK293_PAClight1	10	300	7021.44
HEK293_PACight1_PACAP38_A10_A10_010.fcs	HEK293_PACight1_PACAP38_A10_A10_010.fcs	stable_HEK293_PAClight1_10	stable_HEK293_PAClight1	10	300	1925.1
HEK293_PACight1_PACAP38_A10_A10_010.fcs	HEK293_PACight1_PACAP38_A10_A10_010.fcs	stable_HEK293_PAClight1_10	stable_HEK293_PAClight1	10	300	1614.6
HEK293_PACight1_PACAP38_A10_A10_010.fcs	HEK293_PACight1_PACAP38_A10_A10_010.fcs	stable_HEK293_PAClight1_10	stable_HEK293_PAClight1	10	300	5444.1
HEK293_PACight1_PACAP38_A10_A10_010.fcs	HEK293_PACight1_PACAP38_A10_A10_010.fcs	stable_HEK293_PAClight1_10	stable_HEK293_PAClight1	10	300	2090.7
HEK293_PACight1_PACAP38_A10_A10_010.fcs	HEK293_PACight1_PACAP38_A10_A10_010.fcs	stable_HEK293_PAClight1_10	stable_HEK293_PAClight1	10	300	4090.32
HEK293_PACight1_PACAP38_A10_A10_010.fcs	HEK293_PACight1_PACAP38_A10_A10_010.fcs	stable_HEK293_PAClight1_10	stable_HEK293_PAClight1	10	300	3226.44
HEK293_PACight1_PACAP38_A10_A10_010.fcs	HEK293_PACight1_PACAP38_A10_A10_010.fcs	stable_HEK293_PAClight1_10	stable_HEK293_PAClight1	10	300	4130.34
HEK293_PACight1_PACAP38_A10_A10_010.fcs	HEK293_PACight1_PACAP38_A10_A10_010.fcs	stable_HEK293_PAClight1_10	stable_HEK293_PAClight1	10	300	3441.72
HEK293_PACight1_PACAP38_A10_A10_010.fcs	HEK293_PACight1_PACAP38_A10_A10_010.fcs	stable_HEK293_PAClight1_10	stable_HEK293_PAClight1	10	300	1898.88
HEK293_PACight1_PACAP38_A10_A10_010.fcs	HEK293_PACight1_PACAP38_A10_A10_010.fcs	stable_HEK293_PAClight1_10	stable_HEK293_PAClight1	10	300	15255.9
HEK293_PACight1_PACAP38_A10_A10_010.fcs	HEK293_PACight1_PACAP38_A10_A10_010.fcs	stable_HEK293_PAClight1_10	stable_HEK293_PAClight1	10	300	7151.16
HEK293_PACight1_PACAP38_A10_A10_010.fcs	HEK293_PACight1_PACAP38_A10_A10_010.fcs	stable_HEK293_PAClight1_10	stable_HEK293_PAClight1	10	300	165.6
HEK293_PACight1_PACAP38_A10_A10_010.fcs	HEK293_PACight1_PACAP38_A10_A10_010.fcs	stable_HEK293_PAClight1_10	stable_HEK293_PAClight1	10	300	10663.3
HEK293_PACight1_PACAP38_A10_A10_010.fcs	HEK293_PACight1_PACAP38_A10_A10_010.fcs	stable_HEK293_PAClight1_10	stable_HEK293_PAClight1	10	300	142.14
HEK293_PACight1_PACAP38_A10_A10_010.fcs	HEK293_PACight1_PACAP38_A10_A10_010.fcs	stable_HEK293_PAClight1_10	stable_HEK293_PAClight1	10	300	3916.44
HEK293_PACight1_PACAP38_A10_A10_010.fcs	HEK293_PACight1_PACAP38_A10_A10_010.fcs	stable_HEK293_PAClight1_10	stable_HEK293_PAClight1	10	300	3226.44
HEK293_PACight1_PACAP38_A10_A10_010.fcs	HEK293_PACight1_PACAP38_A10_A10_010.fcs	stable_HEK293_PAClight1_10	stable_HEK293_PAClight1	10	300	120.06
HEK293_PACight1_PACAP38_A10_A10_010.fcs	HEK293_PACight1_PACAP38_A10_A10_010.fcs	stable_HEK293_PAClight1_10	stable_HEK293_PAClight1	10	300	3628.02
HEK293_PACight1_PACAP38_A10_A10_010.fcs	HEK293_PACight1_PACAP38_A10_A10_010.fcs	stable_HEK293_PAClight1_10	stable_HEK293_PAClight1	10	300	2634.42
HEK293_PACight1_PACAP38_A10_A10_010.fcs	HEK293_PACight1_PACAP38_A10_A10_010.fcs	stable_HEK293_PAClight1_10	stable_HEK293_PAClight1	10	300	3801.9
HEK293_PACight1_PACAP38_A10_A10_010.fcs	HEK293_PACight1_PACAP38_A10_A10_010.fcs	stable_HEK293_PAClight1_10	stable_HEK293_PAClight1	10	300	2663.4
HEK293_PACight1_PACAP38_A10_A10_010.fcs	HEK293_PACight1_PACAP38_A10_A10_010.fcs	stable_HEK293_PAClight1_10	stable_HEK293_PAClight1	10	300	4370.46
HEK293_PACight1_PACAP38_A10_A10_010.fcs	HEK293_PACight1_PACAP38_A10_A10_010.fcs	stable_HEK293_PAClight1_10	stable_HEK293_PAClight1	10	300	3777.06
HEK293_PACight1_PACAP38_A10_A10_010.fcs	HEK293_PACight1_PACAP38_A10_A10_010.fcs	stable_HEK293_PAClight1_10	stable_HEK293_PAClight1	10	300	4576.08
HEK293_PACight1_PACAP38_A10_A10_010.fcs	HEK293_PACight1_PACAP38_A10_A10_010.fcs	stable_HEK293_PAClight1_10	stable_HEK293_PAClight1	10	300	7504.44
HEK293_PACight1_PACAP38_A10_A10_010.fcs	HEK293_PACight1_PACAP38_A10_A10_010.fcs	stable_HEK293_PAClight1_10	stable_HEK293_PAClight1	10	300	1863
HEK293_PACight1_PACAP38_A10_A10_010.fcs	HEK293_PACight1_PACAP38_A10_A10_010.fcs	stable_HEK293_PAClight1_10	stable_HEK293_PAClight1	10	300	3374.1
HEK293_PACight1_PACAP38_A10_A10_010.fcs	HEK293_PACight1_PACAP38_A10_A10_010.fcs	stable_HEK293_PAClight1_10	stable_HEK293_PAClight1	10	300	2754.48
HEK293_PACight1_PACAP38_A10_A10_010.fcs	HEK293_PACight1_PACAP38_A10_A10_010.fcs	stable_HEK293_PAClight1_10	stable_HEK293_PAClight1	10	300	10031.2
HEK293_PACight1_PACAP38_A10_A10_010.fcs	HEK293_PACight1_PACAP38_A10_A10_010.fcs	stable_HEK293_PAClight1_10	stable_HEK293_PAClight1	10	300	3917.82
HEK293_PACight1_PACAP38_A10_A10_010.fcs	HEK293_PACight1_PACAP38_A10_A10_010.fcs	stable_HEK293_PAClight1_10	stable_HEK293_PAClight1	10	300	5307.48
HEK293_PACight1_PACAP38_A10_A10_010.fcs	HEK293_PACight1_PACAP38_A10_A10_010.fcs	stable_HEK293_PAClight1_10	stable_HEK293_PAClight1	10	300	6545.34
HEK293_PACight1_PACAP38_A10_A10_010.fcs	HEK293_PACight1_PACAP38_A10_A10_010.fcs	stable_HEK293_PAClight1_10	stable_HEK293_PAClight1	10	300	3872.28
HEK293_PACight1_PACAP38_A10_A10_010.fcs	HEK293_PACight1_PACAP38_A10_A10_010.fcs	stable_HEK293_PAClight1_10	stable_HEK293_PAClight1	10	300	1578.72
HEK293_PACight1_PACAP38_A10_A10_010.fcs	HEK293_PACight1_PACAP38_A10_A10_010.fcs	stable_HEK293_PAClight1_10	stable_HEK293_PAClight1	10	300	10781.9
HEK293_PACight1_PACAP38_A10_A10_010.fcs	HEK293_PACight1_PACAP38_A10_A10_010.fcs	stable_HEK293_PAClight1_10	stable_HEK293_PAClight1	10	300	5209.5
HEK293_PACight1_PACAP38_A10_A10_010.fcs	HEK293_PACight1_PACAP38_A10_A10_010.fcs	stable_HEK293_PAClight1_10	stable_HEK293_PAClight1	10	300	7116.66
HEK293_PACight1_PACAP38_A10_A10_010.fcs	HEK293_PACight1_PACAP38_A10_A10_010.fcs	stable_HEK293_PAClight1_10	stable_HEK293_PAClight1	10	300	3109.14
HEK293_PACight1_PACAP38_A10_A10_010.fcs	HEK293_PACight1_PACAP38_A10_A10_010.fcs	stable_HEK293_PAClight1_10	stable_HEK293_PAClight1	10	300	7696.26
HEK293_PACight1_PACAP38_A10_A10_010.fcs	HEK293_PACight1_PACAP38_A10_A10_010.fcs	stable_HEK293_PAClight1_10	stable_HEK293_PAClight1	10	300	6779.94
HEK293_PACight1_PACAP38_A10_A10_010.fcs	HEK293_PACight1_PACAP38_A10_A10_010.fcs	stable_HEK293_PAClight1_10	stable_HEK293_PAClight1	10	300	8834.76
HEK293_PACight1_PACAP38_A10_A10_010.fcs	HEK293_PACight1_PACAP38_A10_A10_010.fcs	stable_HEK293_PAClight1_10	stable_HEK293_PAClight1	10	300	2507.46
HEK293_PACight1_PACAP38_A10_A10_010.fcs	HEK293_PACight1_PACAP38_A10_A10_010.fcs	stable_HEK293_PAClight1_10	stable_HEK293_PAClight1	10	300	3574.2
HEK293_PACight1_PACAP38_A10_A10_010.fcs	HEK293_PACight1_PACAP38_A10_A10_010.fcs	stable_HEK293_PAClight1_10	stable_HEK293_PAClight1	10	300	4054.44
HEK293_PACight1_PACAP38_A10_A10_010.fcs	HEK293_PACight1_PACAP38_A10_A10_010.fcs	stable_HEK293_PAClight1_10	stable_HEK293_PAClight1	10	300	3047.04
HEK293_PACight1_PACAP38_A10_A10_010.fcs	HEK293_PACight1_PACAP38_A10_A10_010.fcs	stable_HEK293_PAClight1_10	stable_HEK293_PAClight1	10	300	193.2
HEK293_PACight1_PACAP38_A10_A10_010.fcs	HEK293_PACight1_PACAP38_A10_A10_010.fcs	stable_HEK293_PAClight1_10	stable_HEK293_PAClight1	10	300	6756.48
HEK293_PACight1_PACAP38_A10_A10_010.fcs	HEK293_PACight1_PACAP38_A10_A10_010.fcs	stable_HEK293_PAClight1_10	stable_HEK293_PAClight1	10	300	2256.3
HEK293_PACight1_PACAP38_A10_A10_010.fcs	HEK293_PACight1_PACAP38_A10_A10_010.fcs	stable_HEK293_PAClight1_10	stable_HEK293_PAClight1	10	300	6194.82
HEK293_PACight1_PACAP38_A10_A10_010.fcs	HEK293_PACight1_PACAP38_A10_A10_010.fcs	stable_HEK293_PAClight1_10	stable_HEK293_PAClight1	10	300	4948.68
HEK293_PACight1_PACAP38_A10_A10_010.fcs	HEK293_PACight1_PACAP38_A10_A10_010.fcs	stable_HEK293_PAClight1_10	stable_HEK293_PAClight1	10	300	8499.42
HEK293_PACight1_PACAP38_A10_A10_010.fcs	HEK293_PACight1_PACAP38_A10_A10_010.fcs	stable_HEK293_PAClight1_10	stable_HEK293_PAClight1	10	300	1627.02
HEK293_PACight1_PACAP38_A10_A10_010.fcs	HEK293_PACight1_PACAP38_A10_A10_010.fcs	stable_HEK293_PAClight1_10	stable_HEK293_PAClight1	10	300	3244.38
HEK293_PACight1_PACAP38_A10_A10_010.fcs	HEK293_PACight1_PACAP38_A10_A10_010.fcs	stable_HEK293_PAClight1_10	stable_HEK293_PAClight1	10	300	3214.02
HEK293_PACight1_PACAP38_A10_A10_010.fcs	HEK293_PACight1_PACAP38_A10_A10_010.fcs	stable_HEK293_PAClight1_10	stable_HEK293_PAClight1	10	300	218.04
HEK293_PACight1_PACAP38_A10_A10_010.fcs	HEK293_PACight1_PACAP38_A10_A10_010.fcs	stable_HEK293_PAClight1_10	stable_HEK293_PAClight1	10	300	3978.54
HEK293_PACight1_PACAP38_A10_A10_010.fcs	HEK293_PACight1_PACAP38_A10_A10_010.fcs	stable_HEK293_PAClight1_10	stable_HEK293_PAClight1	10	300	5702.16
HEK293_PACight1_PACAP38_A10_A10_010.fcs	HEK293_PACight1_PACAP38_A10_A10_010.fcs	stable_HEK293_PAClight1_10	stable_HEK293_PAClight1	10	300	5108.76
HEK293_PACight1_PACAP38_A10_A10_010.fcs	HEK293_PACight1_PACAP38_A10_A10_010.fcs	stable_HEK293_PAClight1_10	stable_HEK293_PAClight1	10	300	10350
HEK293_PACight1_PACAP38_A10_A10_010.fcs	HEK293_PACight1_PACAP38_A10_A10_010.fcs	stable_HEK293_PAClight1_10	stable_HEK293_PAClight1	10	300	4919.7
HEK293_PACight1_PACAP38_A10_A10_010.fcs	HEK293_PACight1_PACAP38_A10_A10_010.fcs	stable_HEK293_PAClight1_10	stable_HEK293_PAClight1	10	300	2350.14
HEK293_PACight1_PACAP38_A10_A10_010.fcs	HEK293_PACight1_PACAP38_A10_A10_010.fcs	stable_HEK293_PAClight1_10	stable_HEK293_PAClight1	10	300	5339.22
HEK293_PACight1_PACAP38_A10_A10_010.fcs	HEK293_PACight1_PACAP38_A10_A10_010.fcs	stable_HEK293_PAClight1_10	stable_HEK293_PAClight1	10	300	5648.34
HEK293_PACight1_PACAP38_A10_A10_010.fcs	HEK293_PACight1_PACAP38_A10_A10_010.fcs	stable_HEK293_PAClight1_10	stable_HEK293_PAClight1	10	300	3352.02
HEK293_PACight1_PACAP38_A10_A10_010.fcs	HEK293_PACight1_PACAP38_A10_A10_010.fcs	stable_HEK293_PAClight1_10	stable_HEK293_PAClight1	10	300	3273.36
HEK293_PACight1_PACAP38_A10_A10_010.fcs	HEK293_PACight1_PACAP38_A10_A10_010.fcs	stable_HEK293_PAClight1_10	stable_HEK293_PAClight1	10	300	6396.3
HEK293_PACight1_PACAP38_A10_A10_010.fcs	HEK293_PACight1_PACAP38_A10_A10_010.fcs	stable_HEK293_PAClight1_10	stable_HEK293_PAClight1	10	300	9153.54
HEK293_PACight1_PACAP38_A10_A10_010.fcs	HEK293_PACight1_PACAP38_A10_A10_010.fcs	stable_HEK293_PAClight1_10	stable_HEK293_PAClight1	10	300	11376.7
HEK293_PACight1_PACAP38_A10_A10_010.fcs	HEK293_PACight1_PACAP38_A10_A10_010.fcs	stable_HEK293_PAClight1_10	stable_HEK293_PAClight1	10	300	4450.5
HEK293_PACight1_PACAP38_A10_A10_010.fcs	HEK293_PACight1_PACAP38_A10_A10_010.fcs	stable_HEK293_PAClight1_10	stable_HEK293_PAClight1	10	300	7291.92
HEK293_PACight1_PACAP38_A10_A10_010.fcs	HEK293_PACight1_PACAP38_A10_A10_010.fcs	stable_HEK293_PAClight1_10	stable_HEK293_PAClight1	10	300	8812.68
HEK293_PACight1_PACAP38_A10_A10_010.fcs	HEK293_PACight1_PACAP38_A10_A10_010.fcs	stable_HEK293_PAClight1_10	stable_HEK293_PAClight1	10	300	5589
HEK293_PACight1_PACAP38_A10_A10_010.fcs	HEK293_PACight1_PACAP38_A10_A10_010.fcs	stable_HEK293_PAClight1_10	stable_HEK293_PAClight1	10	300	7204.98
HEK293_PACight1_PACAP38_A10_A10_010.fcs	HEK293_PACight1_PACAP38_A10_A10_010.fcs	stable_HEK293_PAClight1_10	stable_HEK293_PAClight1	10	300	5987.82
HEK293_PACight1_PACAP38_A10_A10_010.fcs	HEK293_PACight1_PACAP38_A10_A10_010.fcs	stable_HEK293_PAClight1_10	stable_HEK293_PAClight1	10	300	5722.86
HEK293_PACight1_PACAP38_A10_A10_010.fcs	HEK293_PACight1_PACAP38_A10_A10_010.fcs	stable_HEK293_PAClight1_10	stable_HEK293_PAClight1	10	300	6077.52
HEK293_PACight1_PACAP38_A10_A10_010.fcs	HEK293_PACight1_PACAP38_A10_A10_010.fcs	stable_HEK293_PAClight1_10	stable_HEK293_PAClight1	10	300	23640.8
HEK293_PACight1_PACAP38_A10_A10_010.fcs	HEK293_PACight1_PACAP38_A10_A10_010.fcs	stable_HEK293_PAClight1_10	stable_HEK293_PAClight1	10	300	3081.54
HEK293_PACight1_PACAP38_A10_A10_010.fcs	HEK293_PACight1_PACAP38_A10_A10_010.fcs	stable_HEK293_PAClight1_10	stable_HEK293_PAClight1	10	300	4240.74
HEK293_PACight1_PACAP38_A10_A10_010.fcs	HEK293_PACight1_PACAP38_A10_A10_010.fcs	stable_HEK293_PAClight1_10	stable_HEK293_PAClight1	10	300	5711.82
HEK293_PACight1_PACAP38_A10_A10_010.fcs	HEK293_PACight1_PACAP38_A10_A10_010.fcs	stable_HEK293_PAClight1_10	stable_HEK293_PAClight1	10	300	2504.7
HEK293_PACight1_PACAP38_A10_A10_010.fcs	HEK293_PACight1_PACAP38_A10_A10_010.fcs	stable_HEK293_PAClight1_10	stable_HEK293_PAClight1	10	300	3984.06
HEK293_PACight1_PACAP38_A10_A10_010.fcs	HEK293_PACight1_PACAP38_A10_A10_010.fcs	stable_HEK293_PAClight1_10	stable_HEK293_PAClight1	10	300	3501.06
HEK293_PACight1_PACAP38_A10_A10_010.fcs	HEK293_PACight1_PACAP38_A10_A10_010.fcs	stable_HEK293_PAClight1_10	stable_HEK293_PAClight1	10	300	7995.72
HEK293_PACight1_PACAP38_A10_A10_010.fcs	HEK293_PACight1_PACAP38_A10_A10_010.fcs	stable_HEK293_PAClight1_10	stable_HEK293_PAClight1	10	300	3590.76
HEK293_PACight1_PACAP38_A10_A10_010.fcs	HEK293_PACight1_PACAP38_A10_A10_010.fcs	stable_HEK293_PAClight1_10	stable_HEK293_PAClight1	10	300	1397.94
HEK293_PACight1_PACAP38_A10_A10_010.fcs	HEK293_PACight1_PACAP38_A10_A10_010.fcs	stable_HEK293_PAClight1_10	stable_HEK293_PAClight1	10	300	280.14
HEK293_PACight1_PACAP38_A10_A10_010.fcs	HEK293_PACight1_PACAP38_A10_A10_010.fcs	stable_HEK293_PAClight1_10	stable_HEK293_PAClight1	10	300	5279.88
HEK293_PACight1_PACAP38_A10_A10_010.fcs	HEK293_PACight1_PACAP38_A10_A10_010.fcs	stable_HEK293_PAClight1_10	stable_HEK293_PAClight1	10	300	2336.34
HEK293_PACight1_PACAP38_A10_A10_010.fcs	HEK293_PACight1_PACAP38_A10_A10_010.fcs	stable_HEK293_PAClight1_10	stable_HEK293_PAClight1	10	300	2623.38
HEK293_PACight1_PACAP38_A10_A10_010.fcs	HEK293_PACight1_PACAP38_A10_A10_010.fcs	stable_HEK293_PAClight1_10	stable_HEK293_PAClight1	10	300	6440.46
HEK293_PACight1_PACAP38_A10_A10_010.fcs	HEK293_PACight1_PACAP38_A10_A10_010.fcs	stable_HEK293_PAClight1_10	stable_HEK293_PAClight1	10	300	3596.28
HEK293_PACight1_PACAP38_A10_A10_010.fcs	HEK293_PACight1_PACAP38_A10_A10_010.fcs	stable_HEK293_PAClight1_10	stable_HEK293_PAClight1	10	300	4707.18
HEK293_PACight1_PACAP38_A10_A10_010.fcs	HEK293_PACight1_PACAP38_A10_A10_010.fcs	stable_HEK293_PAClight1_10	stable_HEK293_PAClight1	10	300	5997.48
HEK293_PACight1_PACAP38_A10_A10_010.fcs	HEK293_PACight1_PACAP38_A10_A10_010.fcs	stable_HEK293_PAClight1_10	stable_HEK293_PAClight1	10	300	3270.6
HEK293_PACight1_PACAP38_A10_A10_010.fcs	HEK293_PACight1_PACAP38_A10_A10_010.fcs	stable_HEK293_PAClight1_10	stable_HEK293_PAClight1	10	300	3004.26
HEK293_PACight1_PACAP38_A10_A10_010.fcs	HEK293_PACight1_PACAP38_A10_A10_010.fcs	stable_HEK293_PAClight1_10	stable_HEK293_PAClight1	10	300	2535.06
HEK293_PACight1_PACAP38_A10_A10_010.fcs	HEK293_PACight1_PACAP38_A10_A10_010.fcs	stable_HEK293_PAClight1_10	stable_HEK293_PAClight1	10	300	5437.2
HEK293_PACight1_PACAP38_A10_A10_010.fcs	HEK293_PACight1_PACAP38_A10_A10_010.fcs	stable_HEK293_PAClight1_10	stable_HEK293_PAClight1	10	300	3415.5
HEK293_PACight1_PACAP38_A10_A10_010.fcs	HEK293_PACight1_PACAP38_A10_A10_010.fcs	stable_HEK293_PAClight1_10	stable_HEK293_PAClight1	10	300	4082.04
HEK293_PACight1_PACAP38_A10_A10_010.fcs	HEK293_PACight1_PACAP38_A10_A10_010.fcs	stable_HEK293_PAClight1_10	stable_HEK293_PAClight1	10	300	173.88
HEK293_PACight1_PACAP38_A10_A10_010.fcs	HEK293_PACight1_PACAP38_A10_A10_010.fcs	stable_HEK293_PAClight1_10	stable_HEK293_PAClight1	10	300	7238.1
HEK293_PACight1_PACAP38_A10_A10_010.fcs	HEK293_PACight1_PACAP38_A10_A10_010.fcs	stable_HEK293_PAClight1_10	stable_HEK293_PAClight1	10	300	4371.84
HEK293_PACight1_PACAP38_A10_A10_010.fcs	HEK293_PACight1_PACAP38_A10_A10_010.fcs	stable_HEK293_PAClight1_10	stable_HEK293_PAClight1	10	300	186.3
HEK293_PACight1_PACAP38_A10_A10_010.fcs	HEK293_PACight1_PACAP38_A10_A10_010.fcs	stable_HEK293_PAClight1_10	stable_HEK293_PAClight1	10	300	2348.76
HEK293_PACight1_PACAP38_A10_A10_010.fcs	HEK293_PACight1_PACAP38_A10_A10_010.fcs	stable_HEK293_PAClight1_10	stable_HEK293_PAClight1	10	300	8306.22
HEK293_PACight1_PACAP38_A10_A10_010.fcs	HEK293_PACight1_PACAP38_A10_A10_010.fcs	stable_HEK293_PAClight1_10	stable_HEK293_PAClight1	10	300	5593.14
HEK293_PACight1_PACAP38_A10_A10_010.fcs	HEK293_PACight1_PACAP38_A10_A10_010.fcs	stable_HEK293_PAClight1_10	stable_HEK293_PAClight1	10	300	4167.6
HEK293_PACight1_PACAP38_A10_A10_010.fcs	HEK293_PACight1_PACAP38_A10_A10_010.fcs	stable_HEK293_PAClight1_10	stable_HEK293_PAClight1	10	300	3632.16
HEK293_PACight1_PACAP38_A10_A10_010.fcs	HEK293_PACight1_PACAP38_A10_A10_010.fcs	stable_HEK293_PAClight1_10	stable_HEK293_PAClight1	10	300	5187.42
HEK293_PACight1_PACAP38_A10_A10_010.fcs	HEK293_PACight1_PACAP38_A10_A10_010.fcs	stable_HEK293_PAClight1_10	stable_HEK293_PAClight1	10	300	245.64
HEK293_PACight1_PACAP38_A10_A10_010.fcs	HEK293_PACight1_PACAP38_A10_A10_010.fcs	stable_HEK293_PAClight1_10	stable_HEK293_PAClight1	10	300	3350.64
HEK293_PACight1_PACAP38_A10_A10_010.fcs	HEK293_PACight1_PACAP38_A10_A10_010.fcs	stable_HEK293_PAClight1_10	stable_HEK293_PAClight1	10	300	4026.84
HEK293_PACight1_PACAP38_A10_A10_010.fcs	HEK293_PACight1_PACAP38_A10_A10_010.fcs	stable_HEK293_PAClight1_10	stable_HEK293_PAClight1	10	300	3490.02
HEK293_PACight1_PACAP38_A10_A10_010.fcs	HEK293_PACight1_PACAP38_A10_A10_010.fcs	stable_HEK293_PAClight1_10	stable_HEK293_PAClight1	10	300	4030.98
HEK293_PACight1_PACAP38_A10_A10_010.fcs	HEK293_PACight1_PACAP38_A10_A10_010.fcs	stable_HEK293_PAClight1_10	stable_HEK293_PAClight1	10	300	7082.16
HEK293_PACight1_PACAP38_A10_A10_010.fcs	HEK293_PACight1_PACAP38_A10_A10_010.fcs	stable_HEK293_PAClight1_10	stable_HEK293_PAClight1	10	300	4062.72
HEK293_PACight1_PACAP38_A10_A10_010.fcs	HEK293_PACight1_PACAP38_A10_A10_010.fcs	stable_HEK293_PAClight1_10	stable_HEK293_PAClight1	10	300	6147.9
HEK293_PACight1_PACAP38_A10_A10_010.fcs	HEK293_PACight1_PACAP38_A10_A10_010.fcs	stable_HEK293_PAClight1_10	stable_HEK293_PAClight1	10	300	3596.28
HEK293_PACight1_PACAP38_A10_A10_010.fcs	HEK293_PACight1_PACAP38_A10_A10_010.fcs	stable_HEK293_PAClight1_10	stable_HEK293_PAClight1	10	300	2524.02
HEK293_PACight1_PACAP38_A10_A10_010.fcs	HEK293_PACight1_PACAP38_A10_A10_010.fcs	stable_HEK293_PAClight1_10	stable_HEK293_PAClight1	10	300	3939.9
HEK293_PACight1_PACAP38_A10_A10_010.fcs	HEK293_PACight1_PACAP38_A10_A10_010.fcs	stable_HEK293_PAClight1_10	stable_HEK293_PAClight1	10	300	38.64
HEK293_PACight1_PACAP38_A10_A10_010.fcs	HEK293_PACight1_PACAP38_A10_A10_010.fcs	stable_HEK293_PAClight1_10	stable_HEK293_PAClight1	10	300	3339.6
HEK293_PACight1_PACAP38_A10_A10_010.fcs	HEK293_PACight1_PACAP38_A10_A10_010.fcs	stable_HEK293_PAClight1_10	stable_HEK293_PAClight1	10	300	3589.38
HEK293_PACight1_PACAP38_A10_A10_010.fcs	HEK293_PACight1_PACAP38_A10_A10_010.fcs	stable_HEK293_PAClight1_10	stable_HEK293_PAClight1	10	300	1894.74
HEK293_PACight1_PACAP38_A10_A10_010.fcs	HEK293_PACight1_PACAP38_A10_A10_010.fcs	stable_HEK293_PAClight1_10	stable_HEK293_PAClight1	10	300	4237.98
HEK293_PACight1_PACAP38_A10_A10_010.fcs	HEK293_PACight1_PACAP38_A10_A10_010.fcs	stable_HEK293_PAClight1_10	stable_HEK293_PAClight1	10	300	3982.68
HEK293_PACight1_PACAP38_A10_A10_010.fcs	HEK293_PACight1_PACAP38_A10_A10_010.fcs	stable_HEK293_PAClight1_10	stable_HEK293_PAClight1	10	300	688.62
HEK293_PACight1_PACAP38_A10_A10_010.fcs	HEK293_PACight1_PACAP38_A10_A10_010.fcs	stable_HEK293_PAClight1_10	stable_HEK293_PAClight1	10	300	816.96
HEK293_PACight1_PACAP38_A10_A10_010.fcs	HEK293_PACight1_PACAP38_A10_A10_010.fcs	stable_HEK293_PAClight1_10	stable_HEK293_PAClight1	10	300	126.96
HEK293_PACight1_PACAP38_A10_A10_010.fcs	HEK293_PACight1_PACAP38_A10_A10_010.fcs	stable_HEK293_PAClight1_10	stable_HEK293_PAClight1	10	300	3771.54
HEK293_PACight1_PACAP38_A10_A10_010.fcs	HEK293_PACight1_PACAP38_A10_A10_010.fcs	stable_HEK293_PAClight1_10	stable_HEK293_PAClight1	10	300	2456.4
HEK293_PACight1_PACAP38_A10_A10_010.fcs	HEK293_PACight1_PACAP38_A10_A10_010.fcs	stable_HEK293_PAClight1_10	stable_HEK293_PAClight1	10	300	2499.18
HEK293_PACight1_PACAP38_A10_A10_010.fcs	HEK293_PACight1_PACAP38_A10_A10_010.fcs	stable_HEK293_PAClight1_10	stable_HEK293_PAClight1	10	300	1585.62
HEK293_PACight1_PACAP38_A10_A10_010.fcs	HEK293_PACight1_PACAP38_A10_A10_010.fcs	stable_HEK293_PAClight1_10	stable_HEK293_PAClight1	10	300	4537.44
HEK293_PACight1_PACAP38_A10_A10_010.fcs	HEK293_PACight1_PACAP38_A10_A10_010.fcs	stable_HEK293_PAClight1_10	stable_HEK293_PAClight1	10	300	2702.04
HEK293_PACight1_PACAP38_A10_A10_010.fcs	HEK293_PACight1_PACAP38_A10_A10_010.fcs	stable_HEK293_PAClight1_10	stable_HEK293_PAClight1	10	300	3748.08
HEK293_PACight1_PACAP38_A10_A10_010.fcs	HEK293_PACight1_PACAP38_A10_A10_010.fcs	stable_HEK293_PAClight1_10	stable_HEK293_PAClight1	10	300	5860.86
HEK293_PACight1_PACAP38_A10_A10_010.fcs	HEK293_PACight1_PACAP38_A10_A10_010.fcs	stable_HEK293_PAClight1_10	stable_HEK293_PAClight1	10	300	6506.7
HEK293_PACight1_PACAP38_A10_A10_010.fcs	HEK293_PACight1_PACAP38_A10_A10_010.fcs	stable_HEK293_PAClight1_10	stable_HEK293_PAClight1	10	300	1230.96
HEK293_PACight1_PACAP38_A10_A10_010.fcs	HEK293_PACight1_PACAP38_A10_A10_010.fcs	stable_HEK293_PAClight1_10	stable_HEK293_PAClight1	10	300	4567.8
HEK293_PACight1_PACAP38_A10_A10_010.fcs	HEK293_PACight1_PACAP38_A10_A10_010.fcs	stable_HEK293_PAClight1_10	stable_HEK293_PAClight1	10	300	2281.14
HEK293_PACight1_PACAP38_A10_A10_010.fcs	HEK293_PACight1_PACAP38_A10_A10_010.fcs	stable_HEK293_PAClight1_10	stable_HEK293_PAClight1	10	300	5873.28
HEK293_PACight1_PACAP38_A10_A10_010.fcs	HEK293_PACight1_PACAP38_A10_A10_010.fcs	stable_HEK293_PAClight1_10	stable_HEK293_PAClight1	10	300	2448.12
HEK293_PACight1_PACAP38_A10_A10_010.fcs	HEK293_PACight1_PACAP38_A10_A10_010.fcs	stable_HEK293_PAClight1_10	stable_HEK293_PAClight1	10	300	6389.4
HEK293_PACight1_PACAP38_A10_A10_010.fcs	HEK293_PACight1_PACAP38_A10_A10_010.fcs	stable_HEK293_PAClight1_10	stable_HEK293_PAClight1	10	300	9323.28
HEK293_PACight1_PACAP38_A10_A10_010.fcs	HEK293_PACight1_PACAP38_A10_A10_010.fcs	stable_HEK293_PAClight1_10	stable_HEK293_PAClight1	10	300	8021.94
HEK293_PACight1_PACAP38_A10_A10_010.fcs	HEK293_PACight1_PACAP38_A10_A10_010.fcs	stable_HEK293_PAClight1_10	stable_HEK293_PAClight1	10	300	247.02
HEK293_PACight1_PACAP38_A10_A10_010.fcs	HEK293_PACight1_PACAP38_A10_A10_010.fcs	stable_HEK293_PAClight1_10	stable_HEK293_PAClight1	10	300	4326.3
HEK293_PACight1_PACAP38_A10_A10_010.fcs	HEK293_PACight1_PACAP38_A10_A10_010.fcs	stable_HEK293_PAClight1_10	stable_HEK293_PAClight1	10	300	9043.14
HEK293_PACight1_PACAP38_A10_A10_010.fcs	HEK293_PACight1_PACAP38_A10_A10_010.fcs	stable_HEK293_PAClight1_10	stable_HEK293_PAClight1	10	300	8096.46
HEK293_PACight1_PACAP38_A10_A10_010.fcs	HEK293_PACight1_PACAP38_A10_A10_010.fcs	stable_HEK293_PAClight1_10	stable_HEK293_PAClight1	10	300	8754.72
HEK293_PACight1_PACAP38_A10_A10_010.fcs	HEK293_PACight1_PACAP38_A10_A10_010.fcs	stable_HEK293_PAClight1_10	stable_HEK293_PAClight1	10	300	240.12
HEK293_PACight1_PACAP38_A10_A10_010.fcs	HEK293_PACight1_PACAP38_A10_A10_010.fcs	stable_HEK293_PAClight1_10	stable_HEK293_PAClight1	10	300	3931.62
HEK293_PACight1_PACAP38_A10_A10_010.fcs	HEK293_PACight1_PACAP38_A10_A10_010.fcs	stable_HEK293_PAClight1_10	stable_HEK293_PAClight1	10	300	3626.64
HEK293_PACight1_PACAP38_A10_A10_010.fcs	HEK293_PACight1_PACAP38_A10_A10_010.fcs	stable_HEK293_PAClight1_10	stable_HEK293_PAClight1	10	300	40.02
HEK293_PACight1_PACAP38_A10_A10_010.fcs	HEK293_PACight1_PACAP38_A10_A10_010.fcs	stable_HEK293_PAClight1_10	stable_HEK293_PAClight1	10	300	3966.12
HEK293_PACight1_PACAP38_A10_A10_010.fcs	HEK293_PACight1_PACAP38_A10_A10_010.fcs	stable_HEK293_PAClight1_10	stable_HEK293_PAClight1	10	300	9527.52
HEK293_PACight1_PACAP38_A10_A10_010.fcs	HEK293_PACight1_PACAP38_A10_A10_010.fcs	stable_HEK293_PAClight1_10	stable_HEK293_PAClight1	10	300	5717.34
HEK293_PACight1_PACAP38_A10_A10_010.fcs	HEK293_PACight1_PACAP38_A10_A10_010.fcs	stable_HEK293_PAClight1_10	stable_HEK293_PAClight1	10	300	3829.5
HEK293_PACight1_PACAP38_A10_A10_010.fcs	HEK293_PACight1_PACAP38_A10_A10_010.fcs	stable_HEK293_PAClight1_10	stable_HEK293_PAClight1	10	300	7987.44
HEK293_PACight1_PACAP38_A10_A10_010.fcs	HEK293_PACight1_PACAP38_A10_A10_010.fcs	stable_HEK293_PAClight1_10	stable_HEK293_PAClight1	10	300	959.1
HEK293_PACight1_PACAP38_A10_A10_010.fcs	HEK293_PACight1_PACAP38_A10_A10_010.fcs	stable_HEK293_PAClight1_10	stable_HEK293_PAClight1	10	300	510.6
HEK293_PACight1_PACAP38_A10_A10_010.fcs	HEK293_PACight1_PACAP38_A10_A10_010.fcs	stable_HEK293_PAClight1_10	stable_HEK293_PAClight1	10	300	41.4
HEK293_PACight1_PACAP38_A10_A10_010.fcs	HEK293_PACight1_PACAP38_A10_A10_010.fcs	stable_HEK293_PAClight1_10	stable_HEK293_PAClight1	10	300	200.1
HEK293_PACight1_PACAP38_A10_A10_010.fcs	HEK293_PACight1_PACAP38_A10_A10_010.fcs	stable_HEK293_PAClight1_10	stable_HEK293_PAClight1	10	300	233.22
HEK293_PACight1_PACAP38_A10_A10_010.fcs	HEK293_PACight1_PACAP38_A10_A10_010.fcs	stable_HEK293_PAClight1_10	stable_HEK293_PAClight1	10	300	3741.18
HEK293_PACight1_PACAP38_A10_A10_010.fcs	HEK293_PACight1_PACAP38_A10_A10_010.fcs	stable_HEK293_PAClight1_10	stable_HEK293_PAClight1	10	300	3088.44
HEK293_PACight1_PACAP38_A10_A10_010.fcs	HEK293_PACight1_PACAP38_A10_A10_010.fcs	stable_HEK293_PAClight1_10	stable_HEK293_PAClight1	10	300	212.52
HEK293_PACight1_PACAP38_A10_A10_010.fcs	HEK293_PACight1_PACAP38_A10_A10_010.fcs	stable_HEK293_PAClight1_10	stable_HEK293_PAClight1	10	300	2221.8
HEK293_PACight1_PACAP38_A10_A10_010.fcs	HEK293_PACight1_PACAP38_A10_A10_010.fcs	stable_HEK293_PAClight1_10	stable_HEK293_PAClight1	10	300	1229.58
HEK293_PACight1_PACAP38_A10_A10_010.fcs	HEK293_PACight1_PACAP38_A10_A10_010.fcs	stable_HEK293_PAClight1_10	stable_HEK293_PAClight1	10	300	8063.34
HEK293_PACight1_PACAP38_A10_A10_010.fcs	HEK293_PACight1_PACAP38_A10_A10_010.fcs	stable_HEK293_PAClight1_10	stable_HEK293_PAClight1	10	300	2816.58
HEK293_PACight1_PACAP38_A10_A10_010.fcs	HEK293_PACight1_PACAP38_A10_A10_010.fcs	stable_HEK293_PAClight1_10	stable_HEK293_PAClight1	10	300	6016.8
HEK293_PACight1_PACAP38_A10_A10_010.fcs	HEK293_PACight1_PACAP38_A10_A10_010.fcs	stable_HEK293_PAClight1_10	stable_HEK293_PAClight1	10	300	3574.2
HEK293_PACight1_PACAP38_A10_A10_010.fcs	HEK293_PACight1_PACAP38_A10_A10_010.fcs	stable_HEK293_PAClight1_10	stable_HEK293_PAClight1	10	300	8898.24
HEK293_PACight1_PACAP38_A10_A10_010.fcs	HEK293_PACight1_PACAP38_A10_A10_010.fcs	stable_HEK293_PAClight1_10	stable_HEK293_PAClight1	10	300	106.26
HEK293_PACight1_PACAP38_A10_A10_010.fcs	HEK293_PACight1_PACAP38_A10_A10_010.fcs	stable_HEK293_PAClight1_10	stable_HEK293_PAClight1	10	300	2679.96
HEK293_PACight1_PACAP38_A10_A10_010.fcs	HEK293_PACight1_PACAP38_A10_A10_010.fcs	stable_HEK293_PAClight1_10	stable_HEK293_PAClight1	10	300	1582.86
HEK293_PACight1_PACAP38_A10_A10_010.fcs	HEK293_PACight1_PACAP38_A10_A10_010.fcs	stable_HEK293_PAClight1_10	stable_HEK293_PAClight1	10	300	6555
HEK293_PACight1_PACAP38_A10_A10_010.fcs	HEK293_PACight1_PACAP38_A10_A10_010.fcs	stable_HEK293_PAClight1_10	stable_HEK293_PAClight1	10	300	2116.92
HEK293_PACight1_PACAP38_A10_A10_010.fcs	HEK293_PACight1_PACAP38_A10_A10_010.fcs	stable_HEK293_PAClight1_10	stable_HEK293_PAClight1	10	300	5736.66
HEK293_PACight1_PACAP38_A10_A10_010.fcs	HEK293_PACight1_PACAP38_A10_A10_010.fcs	stable_HEK293_PAClight1_10	stable_HEK293_PAClight1	10	300	3256.8
HEK293_PACight1_PACAP38_A10_A10_010.fcs	HEK293_PACight1_PACAP38_A10_A10_010.fcs	stable_HEK293_PAClight1_10	stable_HEK293_PAClight1	10	300	2801.4
HEK293_PACight1_PACAP38_A10_A10_010.fcs	HEK293_PACight1_PACAP38_A10_A10_010.fcs	stable_HEK293_PAClight1_10	stable_HEK293_PAClight1	10	300	1585.62
HEK293_PACight1_PACAP38_A10_A10_010.fcs	HEK293_PACight1_PACAP38_A10_A10_010.fcs	stable_HEK293_PAClight1_10	stable_HEK293_PAClight1	10	300	6487.38
HEK293_PACight1_PACAP38_A10_A10_010.fcs	HEK293_PACight1_PACAP38_A10_A10_010.fcs	stable_HEK293_PAClight1_10	stable_HEK293_PAClight1	10	300	2837.28
HEK293_PACight1_PACAP38_A10_A10_010.fcs	HEK293_PACight1_PACAP38_A10_A10_010.fcs	stable_HEK293_PAClight1_10	stable_HEK293_PAClight1	10	300	2167.98
HEK293_PACight1_PACAP38_A10_A10_010.fcs	HEK293_PACight1_PACAP38_A10_A10_010.fcs	stable_HEK293_PAClight1_10	stable_HEK293_PAClight1	10	300	430.56
HEK293_PACight1_PACAP38_A10_A10_010.fcs	HEK293_PACight1_PACAP38_A10_A10_010.fcs	stable_HEK293_PAClight1_10	stable_HEK293_PAClight1	10	300	3663.9
HEK293_PACight1_PACAP38_A10_A10_010.fcs	HEK293_PACight1_PACAP38_A10_A10_010.fcs	stable_HEK293_PAClight1_10	stable_HEK293_PAClight1	10	300	8692.62
HEK293_PACight1_PACAP38_A10_A10_010.fcs	HEK293_PACight1_PACAP38_A10_A10_010.fcs	stable_HEK293_PAClight1_10	stable_HEK293_PAClight1	10	300	5001.12
HEK293_PACight1_PACAP38_A10_A10_010.fcs	HEK293_PACight1_PACAP38_A10_A10_010.fcs	stable_HEK293_PAClight1_10	stable_HEK293_PAClight1	10	300	1244.76
HEK293_PACight1_PACAP38_A10_A10_010.fcs	HEK293_PACight1_PACAP38_A10_A10_010.fcs	stable_HEK293_PAClight1_10	stable_HEK293_PAClight1	10	300	11354.6
HEK293_PACight1_PACAP38_A10_A10_010.fcs	HEK293_PACight1_PACAP38_A10_A10_010.fcs	stable_HEK293_PAClight1_10	stable_HEK293_PAClight1	10	300	53.82
HEK293_PACight1_PACAP38_A10_A10_010.fcs	HEK293_PACight1_PACAP38_A10_A10_010.fcs	stable_HEK293_PAClight1_10	stable_HEK293_PAClight1	10	300	4124.82
HEK293_PACight1_PACAP38_A10_A10_010.fcs	HEK293_PACight1_PACAP38_A10_A10_010.fcs	stable_HEK293_PAClight1_10	stable_HEK293_PAClight1	10	300	598.92
HEK293_PACight1_PACAP38_A10_A10_010.fcs	HEK293_PACight1_PACAP38_A10_A10_010.fcs	stable_HEK293_PAClight1_10	stable_HEK293_PAClight1	10	300	1709.82
HEK293_PACight1_PACAP38_A10_A10_010.fcs	HEK293_PACight1_PACAP38_A10_A10_010.fcs	stable_HEK293_PAClight1_10	stable_HEK293_PAClight1	10	300	2090.7
HEK293_PACight1_PACAP38_A10_A10_010.fcs	HEK293_PACight1_PACAP38_A10_A10_010.fcs	stable_HEK293_PAClight1_10	stable_HEK293_PAClight1	10	300	2529.54
HEK293_PACight1_PACAP38_A10_A10_010.fcs	HEK293_PACight1_PACAP38_A10_A10_010.fcs	stable_HEK293_PAClight1_10	stable_HEK293_PAClight1	10	300	4536.06
HEK293_PACight1_PACAP38_A10_A10_010.fcs	HEK293_PACight1_PACAP38_A10_A10_010.fcs	stable_HEK293_PAClight1_10	stable_HEK293_PAClight1	10	300	2107.26
HEK293_PACight1_PACAP38_A10_A10_010.fcs	HEK293_PACight1_PACAP38_A10_A10_010.fcs	stable_HEK293_PAClight1_10	stable_HEK293_PAClight1	10	300	2282.52
HEK293_PACight1_PACAP38_A10_A10_010.fcs	HEK293_PACight1_PACAP38_A10_A10_010.fcs	stable_HEK293_PAClight1_10	stable_HEK293_PAClight1	10	300	115.92
HEK293_PACight1_PACAP38_A10_A10_010.fcs	HEK293_PACight1_PACAP38_A10_A10_010.fcs	stable_HEK293_PAClight1_10	stable_HEK293_PAClight1	10	300	5940.9
HEK293_PACight1_PACAP38_A10_A10_010.fcs	HEK293_PACight1_PACAP38_A10_A10_010.fcs	stable_HEK293_PAClight1_10	stable_HEK293_PAClight1	10	300	3292.68
HEK293_PACight1_PACAP38_A10_A10_010.fcs	HEK293_PACight1_PACAP38_A10_A10_010.fcs	stable_HEK293_PAClight1_10	stable_HEK293_PAClight1	10	300	5023.2
HEK293_PACight1_PACAP38_A10_A10_010.fcs	HEK293_PACight1_PACAP38_A10_A10_010.fcs	stable_HEK293_PAClight1_10	stable_HEK293_PAClight1	10	300	5130.84
HEK293_PACight1_PACAP38_A10_A10_010.fcs	HEK293_PACight1_PACAP38_A10_A10_010.fcs	stable_HEK293_PAClight1_10	stable_HEK293_PAClight1	10	300	3654.24
HEK293_PACight1_PACAP38_A10_A10_010.fcs	HEK293_PACight1_PACAP38_A10_A10_010.fcs	stable_HEK293_PAClight1_10	stable_HEK293_PAClight1	10	300	5586.24
HEK293_PACight1_PACAP38_A10_A10_010.fcs	HEK293_PACight1_PACAP38_A10_A10_010.fcs	stable_HEK293_PAClight1_10	stable_HEK293_PAClight1	10	300	2125.2
HEK293_PACight1_PACAP38_A10_A10_010.fcs	HEK293_PACight1_PACAP38_A10_A10_010.fcs	stable_HEK293_PAClight1_10	stable_HEK293_PAClight1	10	300	6503.94
HEK293_PACight1_PACAP38_A10_A10_010.fcs	HEK293_PACight1_PACAP38_A10_A10_010.fcs	stable_HEK293_PAClight1_10	stable_HEK293_PAClight1	10	300	3161.58
HEK293_PACight1_PACAP38_A10_A10_010.fcs	HEK293_PACight1_PACAP38_A10_A10_010.fcs	stable_HEK293_PAClight1_10	stable_HEK293_PAClight1	10	300	7641.06
HEK293_PACight1_PACAP38_A10_A10_010.fcs	HEK293_PACight1_PACAP38_A10_A10_010.fcs	stable_HEK293_PAClight1_10	stable_HEK293_PAClight1	10	300	77.28
HEK293_PACight1_PACAP38_A10_A10_010.fcs	HEK293_PACight1_PACAP38_A10_A10_010.fcs	stable_HEK293_PAClight1_10	stable_HEK293_PAClight1	10	300	5140.5
HEK293_PACight1_PACAP38_A10_A10_010.fcs	HEK293_PACight1_PACAP38_A10_A10_010.fcs	stable_HEK293_PAClight1_10	stable_HEK293_PAClight1	10	300	2307.36
HEK293_PACight1_PACAP38_A10_A10_010.fcs	HEK293_PACight1_PACAP38_A10_A10_010.fcs	stable_HEK293_PAClight1_10	stable_HEK293_PAClight1	10	300	3013.92
HEK293_PACight1_PACAP38_A10_A10_010.fcs	HEK293_PACight1_PACAP38_A10_A10_010.fcs	stable_HEK293_PAClight1_10	stable_HEK293_PAClight1	10	300	5245.38
HEK293_PACight1_PACAP38_A10_A10_010.fcs	HEK293_PACight1_PACAP38_A10_A10_010.fcs	stable_HEK293_PAClight1_10	stable_HEK293_PAClight1	10	300	5288.16
HEK293_PACight1_PACAP38_A10_A10_010.fcs	HEK293_PACight1_PACAP38_A10_A10_010.fcs	stable_HEK293_PAClight1_10	stable_HEK293_PAClight1	10	300	1330.32
HEK293_PACight1_PACAP38_A10_A10_010.fcs	HEK293_PACight1_PACAP38_A10_A10_010.fcs	stable_HEK293_PAClight1_10	stable_HEK293_PAClight1	10	300	4273.86
HEK293_PACight1_PACAP38_A10_A10_010.fcs	HEK293_PACight1_PACAP38_A10_A10_010.fcs	stable_HEK293_PAClight1_10	stable_HEK293_PAClight1	10	300	2631.66
HEK293_PACight1_PACAP38_A10_A10_010.fcs	HEK293_PACight1_PACAP38_A10_A10_010.fcs	stable_HEK293_PAClight1_10	stable_HEK293_PAClight1	10	300	3785.34
HEK293_PACight1_PACAP38_A10_A10_010.fcs	HEK293_PACight1_PACAP38_A10_A10_010.fcs	stable_HEK293_PAClight1_10	stable_HEK293_PAClight1	10	300	1684.98
HEK293_PACight1_PACAP38_A10_A10_010.fcs	HEK293_PACight1_PACAP38_A10_A10_010.fcs	stable_HEK293_PAClight1_10	stable_HEK293_PAClight1	10	300	5918.82
HEK293_PACight1_PACAP38_A10_A10_010.fcs	HEK293_PACight1_PACAP38_A10_A10_010.fcs	stable_HEK293_PAClight1_10	stable_HEK293_PAClight1	10	300	2479.86
HEK293_PACight1_PACAP38_A10_A10_010.fcs	HEK293_PACight1_PACAP38_A10_A10_010.fcs	stable_HEK293_PAClight1_10	stable_HEK293_PAClight1	10	300	2748.96
HEK293_PACight1_PACAP38_A10_A10_010.fcs	HEK293_PACight1_PACAP38_A10_A10_010.fcs	stable_HEK293_PAClight1_10	stable_HEK293_PAClight1	10	300	4651.98
HEK293_PACight1_PACAP38_A10_A10_010.fcs	HEK293_PACight1_PACAP38_A10_A10_010.fcs	stable_HEK293_PAClight1_10	stable_HEK293_PAClight1	10	300	4669.92
HEK293_PACight1_PACAP38_A10_A10_010.fcs	HEK293_PACight1_PACAP38_A10_A10_010.fcs	stable_HEK293_PAClight1_10	stable_HEK293_PAClight1	10	300	10234.1
HEK293_PACight1_PACAP38_A10_A10_010.fcs	HEK293_PACight1_PACAP38_A10_A10_010.fcs	stable_HEK293_PAClight1_10	stable_HEK293_PAClight1	10	300	2130.72
HEK293_PACight1_PACAP38_A10_A10_010.fcs	HEK293_PACight1_PACAP38_A10_A10_010.fcs	stable_HEK293_PAClight1_10	stable_HEK293_PAClight1	10	300	5600.04
HEK293_PACight1_PACAP38_A10_A10_010.fcs	HEK293_PACight1_PACAP38_A10_A10_010.fcs	stable_HEK293_PAClight1_10	stable_HEK293_PAClight1	10	300	4191.06
HEK293_PACight1_PACAP38_A10_A10_010.fcs	HEK293_PACight1_PACAP38_A10_A10_010.fcs	stable_HEK293_PAClight1_10	stable_HEK293_PAClight1	10	300	3053.94
HEK293_PACight1_PACAP38_A10_A10_010.fcs	HEK293_PACight1_PACAP38_A10_A10_010.fcs	stable_HEK293_PAClight1_10	stable_HEK293_PAClight1	10	300	2105.88
HEK293_PACight1_PACAP38_A10_A10_010.fcs	HEK293_PACight1_PACAP38_A10_A10_010.fcs	stable_HEK293_PAClight1_10	stable_HEK293_PAClight1	10	300	4072.38
HEK293_PACight1_PACAP38_A10_A10_010.fcs	HEK293_PACight1_PACAP38_A10_A10_010.fcs	stable_HEK293_PAClight1_10	stable_HEK293_PAClight1	10	300	3716.34
HEK293_PACight1_PACAP38_A10_A10_010.fcs	HEK293_PACight1_PACAP38_A10_A10_010.fcs	stable_HEK293_PAClight1_10	stable_HEK293_PAClight1	10	300	7055.94
HEK293_PACight1_PACAP38_A10_A10_010.fcs	HEK293_PACight1_PACAP38_A10_A10_010.fcs	stable_HEK293_PAClight1_10	stable_HEK293_PAClight1	10	300	7300.2
HEK293_PACight1_PACAP38_A10_A10_010.fcs	HEK293_PACight1_PACAP38_A10_A10_010.fcs	stable_HEK293_PAClight1_10	stable_HEK293_PAClight1	10	300	3007.02
HEK293_PACight1_PACAP38_A10_A10_010.fcs	HEK293_PACight1_PACAP38_A10_A10_010.fcs	stable_HEK293_PAClight1_10	stable_HEK293_PAClight1	10	300	6292.8
HEK293_PACight1_PACAP38_A10_A10_010.fcs	HEK293_PACight1_PACAP38_A10_A10_010.fcs	stable_HEK293_PAClight1_10	stable_HEK293_PAClight1	10	300	7035.24
HEK293_PACight1_PACAP38_A10_A10_010.fcs	HEK293_PACight1_PACAP38_A10_A10_010.fcs	stable_HEK293_PAClight1_10	stable_HEK293_PAClight1	10	300	3284.4
HEK293_PACight1_PACAP38_A10_A10_010.fcs	HEK293_PACight1_PACAP38_A10_A10_010.fcs	stable_HEK293_PAClight1_10	stable_HEK293_PAClight1	10	300	276
HEK293_PACight1_PACAP38_A10_A10_010.fcs	HEK293_PACight1_PACAP38_A10_A10_010.fcs	stable_HEK293_PAClight1_10	stable_HEK293_PAClight1	10	300	4403.58
HEK293_PACight1_PACAP38_A10_A10_010.fcs	HEK293_PACight1_PACAP38_A10_A10_010.fcs	stable_HEK293_PAClight1_10	stable_HEK293_PAClight1	10	300	213.9
HEK293_PACight1_PACAP38_A10_A10_010.fcs	HEK293_PACight1_PACAP38_A10_A10_010.fcs	stable_HEK293_PAClight1_10	stable_HEK293_PAClight1	10	300	5049.42
HEK293_PACight1_PACAP38_A10_A10_010.fcs	HEK293_PACight1_PACAP38_A10_A10_010.fcs	stable_HEK293_PAClight1_10	stable_HEK293_PAClight1	10	300	11027.6
HEK293_PACight1_PACAP38_A10_A10_010.fcs	HEK293_PACight1_PACAP38_A10_A10_010.fcs	stable_HEK293_PAClight1_10	stable_HEK293_PAClight1	10	300	474.72
HEK293_PACight1_PACAP38_A10_A10_010.fcs	HEK293_PACight1_PACAP38_A10_A10_010.fcs	stable_HEK293_PAClight1_10	stable_HEK293_PAClight1	10	300	3822.6
HEK293_PACight1_PACAP38_A10_A10_010.fcs	HEK293_PACight1_PACAP38_A10_A10_010.fcs	stable_HEK293_PAClight1_10	stable_HEK293_PAClight1	10	300	11678.9
HEK293_PACight1_PACAP38_A10_A10_010.fcs	HEK293_PACight1_PACAP38_A10_A10_010.fcs	stable_HEK293_PAClight1_10	stable_HEK293_PAClight1	10	300	3208.5
HEK293_PACight1_PACAP38_A10_A10_010.fcs	HEK293_PACight1_PACAP38_A10_A10_010.fcs	stable_HEK293_PAClight1_10	stable_HEK293_PAClight1	10	300	2358.42
HEK293_PACight1_PACAP38_A10_A10_010.fcs	HEK293_PACight1_PACAP38_A10_A10_010.fcs	stable_HEK293_PAClight1_10	stable_HEK293_PAClight1	10	300	4377.36
HEK293_PACight1_PACAP38_A10_A10_010.fcs	HEK293_PACight1_PACAP38_A10_A10_010.fcs	stable_HEK293_PAClight1_10	stable_HEK293_PAClight1	10	300	2924.22
HEK293_PACight1_PACAP38_A10_A10_010.fcs	HEK293_PACight1_PACAP38_A10_A10_010.fcs	stable_HEK293_PAClight1_10	stable_HEK293_PAClight1	10	300	7091.82
HEK293_PACight1_PACAP38_A10_A10_010.fcs	HEK293_PACight1_PACAP38_A10_A10_010.fcs	stable_HEK293_PAClight1_10	stable_HEK293_PAClight1	10	300	1622.88
HEK293_PACight1_PACAP38_A10_A10_010.fcs	HEK293_PACight1_PACAP38_A10_A10_010.fcs	stable_HEK293_PAClight1_10	stable_HEK293_PAClight1	10	300	2628.9
HEK293_PACight1_PACAP38_A10_A10_010.fcs	HEK293_PACight1_PACAP38_A10_A10_010.fcs	stable_HEK293_PAClight1_10	stable_HEK293_PAClight1	10	300	2719.98
HEK293_PACight1_PACAP38_A10_A10_010.fcs	HEK293_PACight1_PACAP38_A10_A10_010.fcs	stable_HEK293_PAClight1_10	stable_HEK293_PAClight1	10	300	4162.08
HEK293_PACight1_PACAP38_A10_A10_010.fcs	HEK293_PACight1_PACAP38_A10_A10_010.fcs	stable_HEK293_PAClight1_10	stable_HEK293_PAClight1	10	300	2637.18
HEK293_PACight1_PACAP38_A10_A10_010.fcs	HEK293_PACight1_PACAP38_A10_A10_010.fcs	stable_HEK293_PAClight1_10	stable_HEK293_PAClight1	10	300	2773.8
HEK293_PACight1_PACAP38_A10_A10_010.fcs	HEK293_PACight1_PACAP38_A10_A10_010.fcs	stable_HEK293_PAClight1_10	stable_HEK293_PAClight1	10	300	503.7
HEK293_PACight1_PACAP38_A10_A10_010.fcs	HEK293_PACight1_PACAP38_A10_A10_010.fcs	stable_HEK293_PAClight1_10	stable_HEK293_PAClight1	10	300	4745.82
HEK293_PACight1_PACAP38_A10_A10_010.fcs	HEK293_PACight1_PACAP38_A10_A10_010.fcs	stable_HEK293_PAClight1_10	stable_HEK293_PAClight1	10	300	6640.56
HEK293_PACight1_PACAP38_A10_A10_010.fcs	HEK293_PACight1_PACAP38_A10_A10_010.fcs	stable_HEK293_PAClight1_10	stable_HEK293_PAClight1	10	300	4249.02
HEK293_PACight1_PACAP38_A10_A10_010.fcs	HEK293_PACight1_PACAP38_A10_A10_010.fcs	stable_HEK293_PAClight1_10	stable_HEK293_PAClight1	10	300	2638.56
HEK293_PACight1_PACAP38_A10_A10_010.fcs	HEK293_PACight1_PACAP38_A10_A10_010.fcs	stable_HEK293_PAClight1_10	stable_HEK293_PAClight1	10	300	3080.16
HEK293_PACight1_PACAP38_A10_A10_010.fcs	HEK293_PACight1_PACAP38_A10_A10_010.fcs	stable_HEK293_PAClight1_10	stable_HEK293_PAClight1	10	300	5238.48
HEK293_PACight1_PACAP38_A10_A10_010.fcs	HEK293_PACight1_PACAP38_A10_A10_010.fcs	stable_HEK293_PAClight1_10	stable_HEK293_PAClight1	10	300	4088.94
HEK293_PACight1_PACAP38_A10_A10_010.fcs	HEK293_PACight1_PACAP38_A10_A10_010.fcs	stable_HEK293_PAClight1_10	stable_HEK293_PAClight1	10	300	3397.56
HEK293_PACight1_PACAP38_A10_A10_010.fcs	HEK293_PACight1_PACAP38_A10_A10_010.fcs	stable_HEK293_PAClight1_10	stable_HEK293_PAClight1	10	300	2663.4
HEK293_PACight1_PACAP38_A10_A10_010.fcs	HEK293_PACight1_PACAP38_A10_A10_010.fcs	stable_HEK293_PAClight1_10	stable_HEK293_PAClight1	10	300	3586.62
HEK293_PACight1_PACAP38_A10_A10_010.fcs	HEK293_PACight1_PACAP38_A10_A10_010.fcs	stable_HEK293_PAClight1_10	stable_HEK293_PAClight1	10	300	2924.22
HEK293_PACight1_PACAP38_A10_A10_010.fcs	HEK293_PACight1_PACAP38_A10_A10_010.fcs	stable_HEK293_PAClight1_10	stable_HEK293_PAClight1	10	300	2989.08
HEK293_PACight1_PACAP38_A10_A10_010.fcs	HEK293_PACight1_PACAP38_A10_A10_010.fcs	stable_HEK293_PAClight1_10	stable_HEK293_PAClight1	10	300	4278
HEK293_PACight1_PACAP38_A10_A10_010.fcs	HEK293_PACight1_PACAP38_A10_A10_010.fcs	stable_HEK293_PAClight1_10	stable_HEK293_PAClight1	10	300	6149.28
HEK293_PACight1_PACAP38_A10_A10_010.fcs	HEK293_PACight1_PACAP38_A10_A10_010.fcs	stable_HEK293_PAClight1_10	stable_HEK293_PAClight1	10	300	3398.94
HEK293_PACight1_PACAP38_A10_A10_010.fcs	HEK293_PACight1_PACAP38_A10_A10_010.fcs	stable_HEK293_PAClight1_10	stable_HEK293_PAClight1	10	300	3687.36
HEK293_PACight1_PACAP38_A10_A10_010.fcs	HEK293_PACight1_PACAP38_A10_A10_010.fcs	stable_HEK293_PAClight1_10	stable_HEK293_PAClight1	10	300	3114.66
HEK293_PACight1_PACAP38_A10_A10_010.fcs	HEK293_PACight1_PACAP38_A10_A10_010.fcs	stable_HEK293_PAClight1_10	stable_HEK293_PAClight1	10	300	2430.18
HEK293_PACight1_PACAP38_A10_A10_010.fcs	HEK293_PACight1_PACAP38_A10_A10_010.fcs	stable_HEK293_PAClight1_10	stable_HEK293_PAClight1	10	300	5136.36
HEK293_PACight1_PACAP38_A10_A10_010.fcs	HEK293_PACight1_PACAP38_A10_A10_010.fcs	stable_HEK293_PAClight1_10	stable_HEK293_PAClight1	10	300	4491.9
HEK293_PACight1_PACAP38_A10_A10_010.fcs	HEK293_PACight1_PACAP38_A10_A10_010.fcs	stable_HEK293_PAClight1_10	stable_HEK293_PAClight1	10	300	489.9
HEK293_PACight1_PACAP38_A10_A10_010.fcs	HEK293_PACight1_PACAP38_A10_A10_010.fcs	stable_HEK293_PAClight1_10	stable_HEK293_PAClight1	10	300	2609.58
HEK293_PACight1_PACAP38_A10_A10_010.fcs	HEK293_PACight1_PACAP38_A10_A10_010.fcs	stable_HEK293_PAClight1_10	stable_HEK293_PAClight1	10	300	7245
HEK293_PACight1_PACAP38_A10_A10_010.fcs	HEK293_PACight1_PACAP38_A10_A10_010.fcs	stable_HEK293_PAClight1_10	stable_HEK293_PAClight1	10	300	3369.96
HEK293_PACight1_PACAP38_A10_A10_010.fcs	HEK293_PACight1_PACAP38_A10_A10_010.fcs	stable_HEK293_PAClight1_10	stable_HEK293_PAClight1	10	300	6385.26
HEK293_PACight1_PACAP38_A10_A10_010.fcs	HEK293_PACight1_PACAP38_A10_A10_010.fcs	stable_HEK293_PAClight1_10	stable_HEK293_PAClight1	10	300	5198.46
HEK293_PACight1_PACAP38_A10_A10_010.fcs	HEK293_PACight1_PACAP38_A10_A10_010.fcs	stable_HEK293_PAClight1_10	stable_HEK293_PAClight1	10	300	3615.6
HEK293_PACight1_PACAP38_A10_A10_010.fcs	HEK293_PACight1_PACAP38_A10_A10_010.fcs	stable_HEK293_PAClight1_10	stable_HEK293_PAClight1	10	300	3768.78
HEK293_PACight1_PACAP38_A10_A10_010.fcs	HEK293_PACight1_PACAP38_A10_A10_010.fcs	stable_HEK293_PAClight1_10	stable_HEK293_PAClight1	10	300	3288.54
HEK293_PACight1_PACAP38_A10_A10_010.fcs	HEK293_PACight1_PACAP38_A10_A10_010.fcs	stable_HEK293_PAClight1_10	stable_HEK293_PAClight1	10	300	5250.9
HEK293_PACight1_PACAP38_A10_A10_010.fcs	HEK293_PACight1_PACAP38_A10_A10_010.fcs	stable_HEK293_PAClight1_10	stable_HEK293_PAClight1	10	300	1520.76
HEK293_PACight1_PACAP38_A10_A10_010.fcs	HEK293_PACight1_PACAP38_A10_A10_010.fcs	stable_HEK293_PAClight1_10	stable_HEK293_PAClight1	10	300	7222.92
HEK293_PACight1_PACAP38_A10_A10_010.fcs	HEK293_PACight1_PACAP38_A10_A10_010.fcs	stable_HEK293_PAClight1_10	stable_HEK293_PAClight1	10	300	4805.16
HEK293_PACight1_PACAP38_A10_A10_010.fcs	HEK293_PACight1_PACAP38_A10_A10_010.fcs	stable_HEK293_PAClight1_10	stable_HEK293_PAClight1	10	300	3603.18
HEK293_PACight1_PACAP38_A10_A10_010.fcs	HEK293_PACight1_PACAP38_A10_A10_010.fcs	stable_HEK293_PAClight1_10	stable_HEK293_PAClight1	10	300	3510.72
HEK293_PACight1_PACAP38_A10_A10_010.fcs	HEK293_PACight1_PACAP38_A10_A10_010.fcs	stable_HEK293_PAClight1_10	stable_HEK293_PAClight1	10	300	6804.78
HEK293_PACight1_PACAP38_A10_A10_010.fcs	HEK293_PACight1_PACAP38_A10_A10_010.fcs	stable_HEK293_PAClight1_10	stable_HEK293_PAClight1	10	300	7722.48
HEK293_PACight1_PACAP38_A10_A10_010.fcs	HEK293_PACight1_PACAP38_A10_A10_010.fcs	stable_HEK293_PAClight1_10	stable_HEK293_PAClight1	10	300	37.26
HEK293_PACight1_PACAP38_A10_A10_010.fcs	HEK293_PACight1_PACAP38_A10_A10_010.fcs	stable_HEK293_PAClight1_10	stable_HEK293_PAClight1	10	300	4327.68
HEK293_PACight1_PACAP38_A10_A10_010.fcs	HEK293_PACight1_PACAP38_A10_A10_010.fcs	stable_HEK293_PAClight1_10	stable_HEK293_PAClight1	10	300	22277.3
HEK293_PACight1_PACAP38_A10_A10_010.fcs	HEK293_PACight1_PACAP38_A10_A10_010.fcs	stable_HEK293_PAClight1_10	stable_HEK293_PAClight1	10	300	7670.04
HEK293_PACight1_PACAP38_A10_A10_010.fcs	HEK293_PACight1_PACAP38_A10_A10_010.fcs	stable_HEK293_PAClight1_10	stable_HEK293_PAClight1	10	300	4413.24
HEK293_PACight1_PACAP38_A10_A10_010.fcs	HEK293_PACight1_PACAP38_A10_A10_010.fcs	stable_HEK293_PAClight1_10	stable_HEK293_PAClight1	10	300	3792.24
HEK293_PACight1_PACAP38_A10_A10_010.fcs	HEK293_PACight1_PACAP38_A10_A10_010.fcs	stable_HEK293_PAClight1_10	stable_HEK293_PAClight1	10	300	4788.6
HEK293_PACight1_PACAP38_A10_A10_010.fcs	HEK293_PACight1_PACAP38_A10_A10_010.fcs	stable_HEK293_PAClight1_10	stable_HEK293_PAClight1	10	300	2646.84
HEK293_PACight1_PACAP38_A10_A10_010.fcs	HEK293_PACight1_PACAP38_A10_A10_010.fcs	stable_HEK293_PAClight1_10	stable_HEK293_PAClight1	10	300	11327
HEK293_PACight1_PACAP38_A10_A10_010.fcs	HEK293_PACight1_PACAP38_A10_A10_010.fcs	stable_HEK293_PAClight1_10	stable_HEK293_PAClight1	10	300	6414.24
HEK293_PACight1_PACAP38_A10_A10_010.fcs	HEK293_PACight1_PACAP38_A10_A10_010.fcs	stable_HEK293_PAClight1_10	stable_HEK293_PAClight1	10	300	7347.12
HEK293_PACight1_PACAP38_A10_A10_010.fcs	HEK293_PACight1_PACAP38_A10_A10_010.fcs	stable_HEK293_PAClight1_10	stable_HEK293_PAClight1	10	300	9458.52
HEK293_PACight1_PACAP38_A10_A10_010.fcs	HEK293_PACight1_PACAP38_A10_A10_010.fcs	stable_HEK293_PAClight1_10	stable_HEK293_PAClight1	10	300	5318.52
HEK293_PACight1_PACAP38_A10_A10_010.fcs	HEK293_PACight1_PACAP38_A10_A10_010.fcs	stable_HEK293_PAClight1_10	stable_HEK293_PAClight1	10	300	2457.78
HEK293_PACight1_PACAP38_A10_A10_010.fcs	HEK293_PACight1_PACAP38_A10_A10_010.fcs	stable_HEK293_PAClight1_10	stable_HEK293_PAClight1	10	300	13435.7
HEK293_PACight1_PACAP38_A10_A10_010.fcs	HEK293_PACight1_PACAP38_A10_A10_010.fcs	stable_HEK293_PAClight1_10	stable_HEK293_PAClight1	10	300	2931.12
HEK293_PACight1_PACAP38_A10_A10_010.fcs	HEK293_PACight1_PACAP38_A10_A10_010.fcs	stable_HEK293_PAClight1_10	stable_HEK293_PAClight1	10	300	7341.6
HEK293_PACight1_PACAP38_A10_A10_010.fcs	HEK293_PACight1_PACAP38_A10_A10_010.fcs	stable_HEK293_PAClight1_10	stable_HEK293_PAClight1	10	300	3821.22
HEK293_PACight1_PACAP38_A10_A10_010.fcs	HEK293_PACight1_PACAP38_A10_A10_010.fcs	stable_HEK293_PAClight1_10	stable_HEK293_PAClight1	10	300	24721.3
HEK293_PACight1_PACAP38_A10_A10_010.fcs	HEK293_PACight1_PACAP38_A10_A10_010.fcs	stable_HEK293_PAClight1_10	stable_HEK293_PAClight1	10	300	3884.7
HEK293_PACight1_PACAP38_A10_A10_010.fcs	HEK293_PACight1_PACAP38_A10_A10_010.fcs	stable_HEK293_PAClight1_10	stable_HEK293_PAClight1	10	300	3968.88
HEK293_PACight1_PACAP38_A10_A10_010.fcs	HEK293_PACight1_PACAP38_A10_A10_010.fcs	stable_HEK293_PAClight1_10	stable_HEK293_PAClight1	10	300	3931.62
HEK293_PACight1_PACAP38_A10_A10_010.fcs	HEK293_PACight1_PACAP38_A10_A10_010.fcs	stable_HEK293_PAClight1_10	stable_HEK293_PAClight1	10	300	8119.92
HEK293_PACight1_PACAP38_A10_A10_010.fcs	HEK293_PACight1_PACAP38_A10_A10_010.fcs	stable_HEK293_PAClight1_10	stable_HEK293_PAClight1	10	300	2809.68
HEK293_PACight1_PACAP38_A10_A10_010.fcs	HEK293_PACight1_PACAP38_A10_A10_010.fcs	stable_HEK293_PAClight1_10	stable_HEK293_PAClight1	10	300	2583.36
HEK293_PACight1_PACAP38_A10_A10_010.fcs	HEK293_PACight1_PACAP38_A10_A10_010.fcs	stable_HEK293_PAClight1_10	stable_HEK293_PAClight1	10	300	4663.02
HEK293_PACight1_PACAP38_A10_A10_010.fcs	HEK293_PACight1_PACAP38_A10_A10_010.fcs	stable_HEK293_PAClight1_10	stable_HEK293_PAClight1	10	300	6717.84
HEK293_PACight1_PACAP38_A10_A10_010.fcs	HEK293_PACight1_PACAP38_A10_A10_010.fcs	stable_HEK293_PAClight1_10	stable_HEK293_PAClight1	10	300	4682.34
HEK293_PACight1_PACAP38_A10_A10_010.fcs	HEK293_PACight1_PACAP38_A10_A10_010.fcs	stable_HEK293_PAClight1_10	stable_HEK293_PAClight1	10	300	12211.6
HEK293_PACight1_PACAP38_A10_A10_010.fcs	HEK293_PACight1_PACAP38_A10_A10_010.fcs	stable_HEK293_PAClight1_10	stable_HEK293_PAClight1	10	300	1208.88
HEK293_PACight1_PACAP38_A10_A10_010.fcs	HEK293_PACight1_PACAP38_A10_A10_010.fcs	stable_HEK293_PAClight1_10	stable_HEK293_PAClight1	10	300	2917.32
HEK293_PACight1_PACAP38_A10_A10_010.fcs	HEK293_PACight1_PACAP38_A10_A10_010.fcs	stable_HEK293_PAClight1_10	stable_HEK293_PAClight1	10	300	5184.66
HEK293_PACight1_PACAP38_A10_A10_010.fcs	HEK293_PACight1_PACAP38_A10_A10_010.fcs	stable_HEK293_PAClight1_10	stable_HEK293_PAClight1	10	300	3981.3
HEK293_PACight1_PACAP38_A10_A10_010.fcs	HEK293_PACight1_PACAP38_A10_A10_010.fcs	stable_HEK293_PAClight1_10	stable_HEK293_PAClight1	10	300	4347
HEK293_PACight1_PACAP38_A10_A10_010.fcs	HEK293_PACight1_PACAP38_A10_A10_010.fcs	stable_HEK293_PAClight1_10	stable_HEK293_PAClight1	10	300	3007.02
HEK293_PACight1_PACAP38_A10_A10_010.fcs	HEK293_PACight1_PACAP38_A10_A10_010.fcs	stable_HEK293_PAClight1_10	stable_HEK293_PAClight1	10	300	3888.84
HEK293_PACight1_PACAP38_A10_A10_010.fcs	HEK293_PACight1_PACAP38_A10_A10_010.fcs	stable_HEK293_PAClight1_10	stable_HEK293_PAClight1	10	300	2495.04
HEK293_PACight1_PACAP38_A10_A10_010.fcs	HEK293_PACight1_PACAP38_A10_A10_010.fcs	stable_HEK293_PAClight1_10	stable_HEK293_PAClight1	10	300	3749.46
HEK293_PACight1_PACAP38_A10_A10_010.fcs	HEK293_PACight1_PACAP38_A10_A10_010.fcs	stable_HEK293_PAClight1_10	stable_HEK293_PAClight1	10	300	60.72
HEK293_PACight1_PACAP38_A10_A10_010.fcs	HEK293_PACight1_PACAP38_A10_A10_010.fcs	stable_HEK293_PAClight1_10	stable_HEK293_PAClight1	10	300	5949.18
HEK293_PACight1_PACAP38_A10_A10_010.fcs	HEK293_PACight1_PACAP38_A10_A10_010.fcs	stable_HEK293_PAClight1_10	stable_HEK293_PAClight1	10	300	4010.28
HEK293_PACight1_PACAP38_A10_A10_010.fcs	HEK293_PACight1_PACAP38_A10_A10_010.fcs	stable_HEK293_PAClight1_10	stable_HEK293_PAClight1	10	300	9958.08
HEK293_PACight1_PACAP38_A10_A10_010.fcs	HEK293_PACight1_PACAP38_A10_A10_010.fcs	stable_HEK293_PAClight1_10	stable_HEK293_PAClight1	10	300	781.08
HEK293_PACight1_PACAP38_A10_A10_010.fcs	HEK293_PACight1_PACAP38_A10_A10_010.fcs	stable_HEK293_PAClight1_10	stable_HEK293_PAClight1	10	300	804.54
HEK293_PACight1_PACAP38_A10_A10_010.fcs	HEK293_PACight1_PACAP38_A10_A10_010.fcs	stable_HEK293_PAClight1_10	stable_HEK293_PAClight1	10	300	3854.34
HEK293_PACight1_PACAP38_A10_A10_010.fcs	HEK293_PACight1_PACAP38_A10_A10_010.fcs	stable_HEK293_PAClight1_10	stable_HEK293_PAClight1	10	300	3412.74
HEK293_PACight1_PACAP38_A10_A10_010.fcs	HEK293_PACight1_PACAP38_A10_A10_010.fcs	stable_HEK293_PAClight1_10	stable_HEK293_PAClight1	10	300	6524.64
HEK293_PACight1_PACAP38_A10_A10_010.fcs	HEK293_PACight1_PACAP38_A10_A10_010.fcs	stable_HEK293_PAClight1_10	stable_HEK293_PAClight1	10	300	5979.54
HEK293_PACight1_PACAP38_A10_A10_010.fcs	HEK293_PACight1_PACAP38_A10_A10_010.fcs	stable_HEK293_PAClight1_10	stable_HEK293_PAClight1	10	300	6215.52
HEK293_PACight1_PACAP38_A10_A10_010.fcs	HEK293_PACight1_PACAP38_A10_A10_010.fcs	stable_HEK293_PAClight1_10	stable_HEK293_PAClight1	10	300	1206.12
HEK293_PACight1_PACAP38_A10_A10_010.fcs	HEK293_PACight1_PACAP38_A10_A10_010.fcs	stable_HEK293_PAClight1_10	stable_HEK293_PAClight1	10	300	9051.42
HEK293_PACight1_PACAP38_A10_A10_010.fcs	HEK293_PACight1_PACAP38_A10_A10_010.fcs	stable_HEK293_PAClight1_10	stable_HEK293_PAClight1	10	300	3385.14
HEK293_PACight1_PACAP38_A10_A10_010.fcs	HEK293_PACight1_PACAP38_A10_A10_010.fcs	stable_HEK293_PAClight1_10	stable_HEK293_PAClight1	10	300	2703.42
HEK293_PACight1_PACAP38_A10_A10_010.fcs	HEK293_PACight1_PACAP38_A10_A10_010.fcs	stable_HEK293_PAClight1_10	stable_HEK293_PAClight1	10	300	3149.16
HEK293_PACight1_PACAP38_A10_A10_010.fcs	HEK293_PACight1_PACAP38_A10_A10_010.fcs	stable_HEK293_PAClight1_10	stable_HEK293_PAClight1	10	300	5983.68
HEK293_PACight1_PACAP38_A10_A10_010.fcs	HEK293_PACight1_PACAP38_A10_A10_010.fcs	stable_HEK293_PAClight1_10	stable_HEK293_PAClight1	10	300	2301.84
HEK293_PACight1_PACAP38_A10_A10_010.fcs	HEK293_PACight1_PACAP38_A10_A10_010.fcs	stable_HEK293_PAClight1_10	stable_HEK293_PAClight1	10	300	2768.28
HEK293_PACight1_PACAP38_A10_A10_010.fcs	HEK293_PACight1_PACAP38_A10_A10_010.fcs	stable_HEK293_PAClight1_10	stable_HEK293_PAClight1	10	300	961.86
HEK293_PACight1_PACAP38_A10_A10_010.fcs	HEK293_PACight1_PACAP38_A10_A10_010.fcs	stable_HEK293_PAClight1_10	stable_HEK293_PAClight1	10	300	2512.98
HEK293_PACight1_PACAP38_A10_A10_010.fcs	HEK293_PACight1_PACAP38_A10_A10_010.fcs	stable_HEK293_PAClight1_10	stable_HEK293_PAClight1	10	300	3241.62
HEK293_PACight1_PACAP38_A10_A10_010.fcs	HEK293_PACight1_PACAP38_A10_A10_010.fcs	stable_HEK293_PAClight1_10	stable_HEK293_PAClight1	10	300	64.86
HEK293_PACight1_PACAP38_A10_A10_010.fcs	HEK293_PACight1_PACAP38_A10_A10_010.fcs	stable_HEK293_PAClight1_10	stable_HEK293_PAClight1	10	300	8132.34
HEK293_PACight1_PACAP38_A10_A10_010.fcs	HEK293_PACight1_PACAP38_A10_A10_010.fcs	stable_HEK293_PAClight1_10	stable_HEK293_PAClight1	10	300	1893.36
HEK293_PACight1_PACAP38_A10_A10_010.fcs	HEK293_PACight1_PACAP38_A10_A10_010.fcs	stable_HEK293_PAClight1_10	stable_HEK293_PAClight1	10	300	5406.84
HEK293_PACight1_PACAP38_A10_A10_010.fcs	HEK293_PACight1_PACAP38_A10_A10_010.fcs	stable_HEK293_PAClight1_10	stable_HEK293_PAClight1	10	300	5023.2
HEK293_PACight1_PACAP38_A10_A10_010.fcs	HEK293_PACight1_PACAP38_A10_A10_010.fcs	stable_HEK293_PAClight1_10	stable_HEK293_PAClight1	10	300	8609.82
HEK293_PACight1_PACAP38_A10_A10_010.fcs	HEK293_PACight1_PACAP38_A10_A10_010.fcs	stable_HEK293_PAClight1_10	stable_HEK293_PAClight1	10	300	5143.26
HEK293_PACight1_PACAP38_A10_A10_010.fcs	HEK293_PACight1_PACAP38_A10_A10_010.fcs	stable_HEK293_PAClight1_10	stable_HEK293_PAClight1	10	300	3310.62
HEK293_PACight1_PACAP38_A10_A10_010.fcs	HEK293_PACight1_PACAP38_A10_A10_010.fcs	stable_HEK293_PAClight1_10	stable_HEK293_PAClight1	10	300	5123.94
HEK293_PACight1_PACAP38_A10_A10_010.fcs	HEK293_PACight1_PACAP38_A10_A10_010.fcs	stable_HEK293_PAClight1_10	stable_HEK293_PAClight1	10	300	1984.44
HEK293_PACight1_PACAP38_A10_A10_010.fcs	HEK293_PACight1_PACAP38_A10_A10_010.fcs	stable_HEK293_PAClight1_10	stable_HEK293_PAClight1	10	300	4151.04
HEK293_PACight1_PACAP38_A10_A10_010.fcs	HEK293_PACight1_PACAP38_A10_A10_010.fcs	stable_HEK293_PAClight1_10	stable_HEK293_PAClight1	10	300	6637.8
HEK293_PACight1_PACAP38_A10_A10_010.fcs	HEK293_PACight1_PACAP38_A10_A10_010.fcs	stable_HEK293_PAClight1_10	stable_HEK293_PAClight1	10	300	1712.58
HEK293_PACight1_PACAP38_A10_A10_010.fcs	HEK293_PACight1_PACAP38_A10_A10_010.fcs	stable_HEK293_PAClight1_10	stable_HEK293_PAClight1	10	300	5150.16
HEK293_PACight1_PACAP38_A10_A10_010.fcs	HEK293_PACight1_PACAP38_A10_A10_010.fcs	stable_HEK293_PAClight1_10	stable_HEK293_PAClight1	10	300	3930.24
HEK293_PACight1_PACAP38_A10_A10_010.fcs	HEK293_PACight1_PACAP38_A10_A10_010.fcs	stable_HEK293_PAClight1_10	stable_HEK293_PAClight1	10	300	7445.1
HEK293_PACight1_PACAP38_A10_A10_010.fcs	HEK293_PACight1_PACAP38_A10_A10_010.fcs	stable_HEK293_PAClight1_10	stable_HEK293_PAClight1	10	300	4144.14
HEK293_PACight1_PACAP38_A10_A10_010.fcs	HEK293_PACight1_PACAP38_A10_A10_010.fcs	stable_HEK293_PAClight1_10	stable_HEK293_PAClight1	10	300	2041.02
HEK293_PACight1_PACAP38_A10_A10_010.fcs	HEK293_PACight1_PACAP38_A10_A10_010.fcs	stable_HEK293_PAClight1_10	stable_HEK293_PAClight1	10	300	3934.38
HEK293_PACight1_PACAP38_A10_A10_010.fcs	HEK293_PACight1_PACAP38_A10_A10_010.fcs	stable_HEK293_PAClight1_10	stable_HEK293_PAClight1	10	300	13434.3
HEK293_PACight1_PACAP38_A10_A10_010.fcs	HEK293_PACight1_PACAP38_A10_A10_010.fcs	stable_HEK293_PAClight1_10	stable_HEK293_PAClight1	10	300	2343.24
HEK293_PACight1_PACAP38_A10_A10_010.fcs	HEK293_PACight1_PACAP38_A10_A10_010.fcs	stable_HEK293_PAClight1_10	stable_HEK293_PAClight1	10	300	1159.2
HEK293_PACight1_PACAP38_A10_A10_010.fcs	HEK293_PACight1_PACAP38_A10_A10_010.fcs	stable_HEK293_PAClight1_10	stable_HEK293_PAClight1	10	300	3051.18
HEK293_PACight1_PACAP38_A10_A10_010.fcs	HEK293_PACight1_PACAP38_A10_A10_010.fcs	stable_HEK293_PAClight1_10	stable_HEK293_PAClight1	10	300	2195.58
HEK293_PACight1_PACAP38_A10_A10_010.fcs	HEK293_PACight1_PACAP38_A10_A10_010.fcs	stable_HEK293_PAClight1_10	stable_HEK293_PAClight1	10	300	5104.62
HEK293_PACight1_PACAP38_A10_A10_010.fcs	HEK293_PACight1_PACAP38_A10_A10_010.fcs	stable_HEK293_PAClight1_10	stable_HEK293_PAClight1	10	300	56989.9
HEK293_PACight1_PACAP38_A10_A10_010.fcs	HEK293_PACight1_PACAP38_A10_A10_010.fcs	stable_HEK293_PAClight1_10	stable_HEK293_PAClight1	10	300	2214.9
HEK293_PACight1_PACAP38_A10_A10_010.fcs	HEK293_PACight1_PACAP38_A10_A10_010.fcs	stable_HEK293_PAClight1_10	stable_HEK293_PAClight1	10	300	8659.5
HEK293_PACight1_PACAP38_A10_A10_010.fcs	HEK293_PACight1_PACAP38_A10_A10_010.fcs	stable_HEK293_PAClight1_10	stable_HEK293_PAClight1	10	300	3178.14
HEK293_PACight1_PACAP38_A10_A10_010.fcs	HEK293_PACight1_PACAP38_A10_A10_010.fcs	stable_HEK293_PAClight1_10	stable_HEK293_PAClight1	10	300	7178.76
HEK293_PACight1_PACAP38_A10_A10_010.fcs	HEK293_PACight1_PACAP38_A10_A10_010.fcs	stable_HEK293_PAClight1_10	stable_HEK293_PAClight1	10	300	9447.48
HEK293_PACight1_PACAP38_A10_A10_010.fcs	HEK293_PACight1_PACAP38_A10_A10_010.fcs	stable_HEK293_PAClight1_10	stable_HEK293_PAClight1	10	300	4494.66
HEK293_PACight1_PACAP38_A10_A10_010.fcs	HEK293_PACight1_PACAP38_A10_A10_010.fcs	stable_HEK293_PAClight1_10	stable_HEK293_PAClight1	10	300	5089.44
HEK293_PACight1_PACAP38_A10_A10_010.fcs	HEK293_PACight1_PACAP38_A10_A10_010.fcs	stable_HEK293_PAClight1_10	stable_HEK293_PAClight1	10	300	3979.92
HEK293_PACight1_PACAP38_A10_A10_010.fcs	HEK293_PACight1_PACAP38_A10_A10_010.fcs	stable_HEK293_PAClight1_10	stable_HEK293_PAClight1	10	300	2304.6
HEK293_PACight1_PACAP38_A10_A10_010.fcs	HEK293_PACight1_PACAP38_A10_A10_010.fcs	stable_HEK293_PAClight1_10	stable_HEK293_PAClight1	10	300	209.76
HEK293_PACight1_PACAP38_A10_A10_010.fcs	HEK293_PACight1_PACAP38_A10_A10_010.fcs	stable_HEK293_PAClight1_10	stable_HEK293_PAClight1	10	300	5315.76
HEK293_PACight1_PACAP38_A10_A10_010.fcs	HEK293_PACight1_PACAP38_A10_A10_010.fcs	stable_HEK293_PAClight1_10	stable_HEK293_PAClight1	10	300	8263.44
HEK293_PACight1_PACAP38_A10_A10_010.fcs	HEK293_PACight1_PACAP38_A10_A10_010.fcs	stable_HEK293_PAClight1_10	stable_HEK293_PAClight1	10	300	4709.94
HEK293_PACight1_PACAP38_A10_A10_010.fcs	HEK293_PACight1_PACAP38_A10_A10_010.fcs	stable_HEK293_PAClight1_10	stable_HEK293_PAClight1	10	300	7214.64
HEK293_PACight1_PACAP38_A10_A10_010.fcs	HEK293_PACight1_PACAP38_A10_A10_010.fcs	stable_HEK293_PAClight1_10	stable_HEK293_PAClight1	10	300	3895.74
HEK293_PACight1_PACAP38_A10_A10_010.fcs	HEK293_PACight1_PACAP38_A10_A10_010.fcs	stable_HEK293_PAClight1_10	stable_HEK293_PAClight1	10	300	3679.08
HEK293_PACight1_PACAP38_A10_A10_010.fcs	HEK293_PACight1_PACAP38_A10_A10_010.fcs	stable_HEK293_PAClight1_10	stable_HEK293_PAClight1	10	300	4548.48
HEK293_PACight1_PACAP38_A10_A10_010.fcs	HEK293_PACight1_PACAP38_A10_A10_010.fcs	stable_HEK293_PAClight1_10	stable_HEK293_PAClight1	10	300	4577.46
HEK293_PACight1_PACAP38_A10_A10_010.fcs	HEK293_PACight1_PACAP38_A10_A10_010.fcs	stable_HEK293_PAClight1_10	stable_HEK293_PAClight1	10	300	5733.9
HEK293_PACight1_PACAP38_A10_A10_010.fcs	HEK293_PACight1_PACAP38_A10_A10_010.fcs	stable_HEK293_PAClight1_10	stable_HEK293_PAClight1	10	300	2793.12
HEK293_PACight1_PACAP38_A10_A10_010.fcs	HEK293_PACight1_PACAP38_A10_A10_010.fcs	stable_HEK293_PAClight1_10	stable_HEK293_PAClight1	10	300	736.92
HEK293_PACight1_PACAP38_A10_A10_010.fcs	HEK293_PACight1_PACAP38_A10_A10_010.fcs	stable_HEK293_PAClight1_10	stable_HEK293_PAClight1	10	300	4552.62
HEK293_PACight1_PACAP38_A10_A10_010.fcs	HEK293_PACight1_PACAP38_A10_A10_010.fcs	stable_HEK293_PAClight1_10	stable_HEK293_PAClight1	10	300	4013.04
HEK293_PACight1_PACAP38_A10_A10_010.fcs	HEK293_PACight1_PACAP38_A10_A10_010.fcs	stable_HEK293_PAClight1_10	stable_HEK293_PAClight1	10	300	5642.82
HEK293_PACight1_PACAP38_A10_A10_010.fcs	HEK293_PACight1_PACAP38_A10_A10_010.fcs	stable_HEK293_PAClight1_10	stable_HEK293_PAClight1	10	300	4730.64
HEK293_PACight1_PACAP38_A10_A10_010.fcs	HEK293_PACight1_PACAP38_A10_A10_010.fcs	stable_HEK293_PAClight1_10	stable_HEK293_PAClight1	10	300	3738.42
HEK293_PACight1_PACAP38_A10_A10_010.fcs	HEK293_PACight1_PACAP38_A10_A10_010.fcs	stable_HEK293_PAClight1_10	stable_HEK293_PAClight1	10	300	3640.44
HEK293_PACight1_PACAP38_A10_A10_010.fcs	HEK293_PACight1_PACAP38_A10_A10_010.fcs	stable_HEK293_PAClight1_10	stable_HEK293_PAClight1	10	300	3122.94
HEK293_PACight1_PACAP38_A10_A10_010.fcs	HEK293_PACight1_PACAP38_A10_A10_010.fcs	stable_HEK293_PAClight1_10	stable_HEK293_PAClight1	10	300	3785.34
HEK293_PACight1_PACAP38_A10_A10_010.fcs	HEK293_PACight1_PACAP38_A10_A10_010.fcs	stable_HEK293_PAClight1_10	stable_HEK293_PAClight1	10	300	27292.3
HEK293_PACight1_PACAP38_A10_A10_010.fcs	HEK293_PACight1_PACAP38_A10_A10_010.fcs	stable_HEK293_PAClight1_10	stable_HEK293_PAClight1	10	300	42.78
HEK293_PACight1_PACAP38_A10_A10_010.fcs	HEK293_PACight1_PACAP38_A10_A10_010.fcs	stable_HEK293_PAClight1_10	stable_HEK293_PAClight1	10	300	5121.18
HEK293_PACight1_PACAP38_A10_A10_010.fcs	HEK293_PACight1_PACAP38_A10_A10_010.fcs	stable_HEK293_PAClight1_10	stable_HEK293_PAClight1	10	300	2442.6
HEK293_PACight1_PACAP38_A10_A10_010.fcs	HEK293_PACight1_PACAP38_A10_A10_010.fcs	stable_HEK293_PAClight1_10	stable_HEK293_PAClight1	10	300	3632.16
HEK293_PACight1_PACAP38_A10_A10_010.fcs	HEK293_PACight1_PACAP38_A10_A10_010.fcs	stable_HEK293_PAClight1_10	stable_HEK293_PAClight1	10	300	6378.36
HEK293_PACight1_PACAP38_A10_A10_010.fcs	HEK293_PACight1_PACAP38_A10_A10_010.fcs	stable_HEK293_PAClight1_10	stable_HEK293_PAClight1	10	300	10165.1
HEK293_PACight1_PACAP38_A10_A10_010.fcs	HEK293_PACight1_PACAP38_A10_A10_010.fcs	stable_HEK293_PAClight1_10	stable_HEK293_PAClight1	10	300	6196.2
HEK293_PACight1_PACAP38_A10_A10_010.fcs	HEK293_PACight1_PACAP38_A10_A10_010.fcs	stable_HEK293_PAClight1_10	stable_HEK293_PAClight1	10	300	5199.84
HEK293_PACight1_PACAP38_A10_A10_010.fcs	HEK293_PACight1_PACAP38_A10_A10_010.fcs	stable_HEK293_PAClight1_10	stable_HEK293_PAClight1	10	300	4573.32
HEK293_PACight1_PACAP38_A10_A10_010.fcs	HEK293_PACight1_PACAP38_A10_A10_010.fcs	stable_HEK293_PAClight1_10	stable_HEK293_PAClight1	10	300	6338.34
HEK293_PACight1_PACAP38_A10_A10_010.fcs	HEK293_PACight1_PACAP38_A10_A10_010.fcs	stable_HEK293_PAClight1_10	stable_HEK293_PAClight1	10	300	1061.22
HEK293_PACight1_PACAP38_A10_A10_010.fcs	HEK293_PACight1_PACAP38_A10_A10_010.fcs	stable_HEK293_PAClight1_10	stable_HEK293_PAClight1	10	300	1765.02
HEK293_PACight1_PACAP38_A10_A10_010.fcs	HEK293_PACight1_PACAP38_A10_A10_010.fcs	stable_HEK293_PAClight1_10	stable_HEK293_PAClight1	10	300	2090.7
HEK293_PACight1_PACAP38_A10_A10_010.fcs	HEK293_PACight1_PACAP38_A10_A10_010.fcs	stable_HEK293_PAClight1_10	stable_HEK293_PAClight1	10	300	125.58
HEK293_PACight1_PACAP38_A10_A10_010.fcs	HEK293_PACight1_PACAP38_A10_A10_010.fcs	stable_HEK293_PAClight1_10	stable_HEK293_PAClight1	10	300	6403.2
HEK293_PACight1_PACAP38_A10_A10_010.fcs	HEK293_PACight1_PACAP38_A10_A10_010.fcs	stable_HEK293_PAClight1_10	stable_HEK293_PAClight1	10	300	4427.04
HEK293_PACight1_PACAP38_A10_A10_010.fcs	HEK293_PACight1_PACAP38_A10_A10_010.fcs	stable_HEK293_PAClight1_10	stable_HEK293_PAClight1	10	300	6011.28
HEK293_PACight1_PACAP38_A10_A10_010.fcs	HEK293_PACight1_PACAP38_A10_A10_010.fcs	stable_HEK293_PAClight1_10	stable_HEK293_PAClight1	10	300	9746.94
HEK293_PACight1_PACAP38_A10_A10_010.fcs	HEK293_PACight1_PACAP38_A10_A10_010.fcs	stable_HEK293_PAClight1_10	stable_HEK293_PAClight1	10	300	3001.5
HEK293_PACight1_PACAP38_A10_A10_010.fcs	HEK293_PACight1_PACAP38_A10_A10_010.fcs	stable_HEK293_PAClight1_10	stable_HEK293_PAClight1	10	300	848.7
HEK293_PACight1_PACAP38_A10_A10_010.fcs	HEK293_PACight1_PACAP38_A10_A10_010.fcs	stable_HEK293_PAClight1_10	stable_HEK293_PAClight1	10	300	7182.9
HEK293_PACight1_PACAP38_A10_A10_010.fcs	HEK293_PACight1_PACAP38_A10_A10_010.fcs	stable_HEK293_PAClight1_10	stable_HEK293_PAClight1	10	300	2691
HEK293_PACight1_PACAP38_A10_A10_010.fcs	HEK293_PACight1_PACAP38_A10_A10_010.fcs	stable_HEK293_PAClight1_10	stable_HEK293_PAClight1	10	300	6853.08
HEK293_PACight1_PACAP38_A10_A10_010.fcs	HEK293_PACight1_PACAP38_A10_A10_010.fcs	stable_HEK293_PAClight1_10	stable_HEK293_PAClight1	10	300	6599.16
HEK293_PACight1_PACAP38_A10_A10_010.fcs	HEK293_PACight1_PACAP38_A10_A10_010.fcs	stable_HEK293_PAClight1_10	stable_HEK293_PAClight1	10	300	4708.56
HEK293_PACight1_PACAP38_A10_A10_010.fcs	HEK293_PACight1_PACAP38_A10_A10_010.fcs	stable_HEK293_PAClight1_10	stable_HEK293_PAClight1	10	300	10613.6
HEK293_PACight1_PACAP38_A10_A10_010.fcs	HEK293_PACight1_PACAP38_A10_A10_010.fcs	stable_HEK293_PAClight1_10	stable_HEK293_PAClight1	10	300	8375.22
HEK293_PACight1_PACAP38_A10_A10_010.fcs	HEK293_PACight1_PACAP38_A10_A10_010.fcs	stable_HEK293_PAClight1_10	stable_HEK293_PAClight1	10	300	1275.12
HEK293_PACight1_PACAP38_A10_A10_010.fcs	HEK293_PACight1_PACAP38_A10_A10_010.fcs	stable_HEK293_PAClight1_10	stable_HEK293_PAClight1	10	300	95.22
HEK293_PACight1_PACAP38_A10_A10_010.fcs	HEK293_PACight1_PACAP38_A10_A10_010.fcs	stable_HEK293_PAClight1_10	stable_HEK293_PAClight1	10	300	4974.9
HEK293_PACight1_PACAP38_A10_A10_010.fcs	HEK293_PACight1_PACAP38_A10_A10_010.fcs	stable_HEK293_PAClight1_10	stable_HEK293_PAClight1	10	300	3175.38
HEK293_PACight1_PACAP38_A10_A10_010.fcs	HEK293_PACight1_PACAP38_A10_A10_010.fcs	stable_HEK293_PAClight1_10	stable_HEK293_PAClight1	10	300	4555.38
HEK293_PACight1_PACAP38_A10_A10_010.fcs	HEK293_PACight1_PACAP38_A10_A10_010.fcs	stable_HEK293_PAClight1_10	stable_HEK293_PAClight1	10	300	4789.98
HEK293_PACight1_PACAP38_A10_A10_010.fcs	HEK293_PACight1_PACAP38_A10_A10_010.fcs	stable_HEK293_PAClight1_10	stable_HEK293_PAClight1	10	300	121.44
HEK293_PACight1_PACAP38_A10_A10_010.fcs	HEK293_PACight1_PACAP38_A10_A10_010.fcs	stable_HEK293_PAClight1_10	stable_HEK293_PAClight1	10	300	4656.12
HEK293_PACight1_PACAP38_A10_A10_010.fcs	HEK293_PACight1_PACAP38_A10_A10_010.fcs	stable_HEK293_PAClight1_10	stable_HEK293_PAClight1	10	300	2339.1
HEK293_PACight1_PACAP38_A10_A10_010.fcs	HEK293_PACight1_PACAP38_A10_A10_010.fcs	stable_HEK293_PAClight1_10	stable_HEK293_PAClight1	10	300	7843.92
HEK293_PACight1_PACAP38_A10_A10_010.fcs	HEK293_PACight1_PACAP38_A10_A10_010.fcs	stable_HEK293_PAClight1_10	stable_HEK293_PAClight1	10	300	4028.22
HEK293_PACight1_PACAP38_A10_A10_010.fcs	HEK293_PACight1_PACAP38_A10_A10_010.fcs	stable_HEK293_PAClight1_10	stable_HEK293_PAClight1	10	300	12967.9
HEK293_PACight1_PACAP38_A10_A10_010.fcs	HEK293_PACight1_PACAP38_A10_A10_010.fcs	stable_HEK293_PAClight1_10	stable_HEK293_PAClight1	10	300	412.62
HEK293_PACight1_PACAP38_A10_A10_010.fcs	HEK293_PACight1_PACAP38_A10_A10_010.fcs	stable_HEK293_PAClight1_10	stable_HEK293_PAClight1	10	300	5703.54
HEK293_PACight1_PACAP38_A10_A10_010.fcs	HEK293_PACight1_PACAP38_A10_A10_010.fcs	stable_HEK293_PAClight1_10	stable_HEK293_PAClight1	10	300	4160.7
HEK293_PACight1_PACAP38_A10_A10_010.fcs	HEK293_PACight1_PACAP38_A10_A10_010.fcs	stable_HEK293_PAClight1_10	stable_HEK293_PAClight1	10	300	5141.88
HEK293_PACight1_PACAP38_A10_A10_010.fcs	HEK293_PACight1_PACAP38_A10_A10_010.fcs	stable_HEK293_PAClight1_10	stable_HEK293_PAClight1	10	300	5590.38
HEK293_PACight1_PACAP38_A10_A10_010.fcs	HEK293_PACight1_PACAP38_A10_A10_010.fcs	stable_HEK293_PAClight1_10	stable_HEK293_PAClight1	10	300	15329
HEK293_PACight1_PACAP38_A10_A10_010.fcs	HEK293_PACight1_PACAP38_A10_A10_010.fcs	stable_HEK293_PAClight1_10	stable_HEK293_PAClight1	10	300	6488.76
HEK293_PACight1_PACAP38_A10_A10_010.fcs	HEK293_PACight1_PACAP38_A10_A10_010.fcs	stable_HEK293_PAClight1_10	stable_HEK293_PAClight1	10	300	2860.74
HEK293_PACight1_PACAP38_A10_A10_010.fcs	HEK293_PACight1_PACAP38_A10_A10_010.fcs	stable_HEK293_PAClight1_10	stable_HEK293_PAClight1	10	300	3182.28
HEK293_PACight1_PACAP38_A10_A10_010.fcs	HEK293_PACight1_PACAP38_A10_A10_010.fcs	stable_HEK293_PAClight1_10	stable_HEK293_PAClight1	10	300	3989.58
HEK293_PACight1_PACAP38_A10_A10_010.fcs	HEK293_PACight1_PACAP38_A10_A10_010.fcs	stable_HEK293_PAClight1_10	stable_HEK293_PAClight1	10	300	2795.88
HEK293_PACight1_PACAP38_A10_A10_010.fcs	HEK293_PACight1_PACAP38_A10_A10_010.fcs	stable_HEK293_PAClight1_10	stable_HEK293_PAClight1	10	300	681.72
HEK293_PACight1_PACAP38_A10_A10_010.fcs	HEK293_PACight1_PACAP38_A10_A10_010.fcs	stable_HEK293_PAClight1_10	stable_HEK293_PAClight1	10	300	4155.18
HEK293_PACight1_PACAP38_A10_A10_010.fcs	HEK293_PACight1_PACAP38_A10_A10_010.fcs	stable_HEK293_PAClight1_10	stable_HEK293_PAClight1	10	300	3862.62
HEK293_PACight1_PACAP38_A10_A10_010.fcs	HEK293_PACight1_PACAP38_A10_A10_010.fcs	stable_HEK293_PAClight1_10	stable_HEK293_PAClight1	10	300	3782.58
HEK293_PACight1_PACAP38_A10_A10_010.fcs	HEK293_PACight1_PACAP38_A10_A10_010.fcs	stable_HEK293_PAClight1_10	stable_HEK293_PAClight1	10	300	4675.44
HEK293_PACight1_PACAP38_A10_A10_010.fcs	HEK293_PACight1_PACAP38_A10_A10_010.fcs	stable_HEK293_PAClight1_10	stable_HEK293_PAClight1	10	300	5612.46
HEK293_PACight1_PACAP38_A10_A10_010.fcs	HEK293_PACight1_PACAP38_A10_A10_010.fcs	stable_HEK293_PAClight1_10	stable_HEK293_PAClight1	10	300	3800.52
HEK293_PACight1_PACAP38_A10_A10_010.fcs	HEK293_PACight1_PACAP38_A10_A10_010.fcs	stable_HEK293_PAClight1_10	stable_HEK293_PAClight1	10	300	3437.58
HEK293_PACight1_PACAP38_A10_A10_010.fcs	HEK293_PACight1_PACAP38_A10_A10_010.fcs	stable_HEK293_PAClight1_10	stable_HEK293_PAClight1	10	300	3382.38
HEK293_PACight1_PACAP38_A10_A10_010.fcs	HEK293_PACight1_PACAP38_A10_A10_010.fcs	stable_HEK293_PAClight1_10	stable_HEK293_PAClight1	10	300	5228.82
HEK293_PACight1_PACAP38_A10_A10_010.fcs	HEK293_PACight1_PACAP38_A10_A10_010.fcs	stable_HEK293_PAClight1_10	stable_HEK293_PAClight1	10	300	7569.3
HEK293_PACight1_PACAP38_A10_A10_010.fcs	HEK293_PACight1_PACAP38_A10_A10_010.fcs	stable_HEK293_PAClight1_10	stable_HEK293_PAClight1	10	300	2768.28
HEK293_PACight1_PACAP38_A10_A10_010.fcs	HEK293_PACight1_PACAP38_A10_A10_010.fcs	stable_HEK293_PAClight1_10	stable_HEK293_PAClight1	10	300	2188.68
HEK293_PACight1_PACAP38_A10_A10_010.fcs	HEK293_PACight1_PACAP38_A10_A10_010.fcs	stable_HEK293_PAClight1_10	stable_HEK293_PAClight1	10	300	2953.2
HEK293_PACight1_PACAP38_A10_A10_010.fcs	HEK293_PACight1_PACAP38_A10_A10_010.fcs	stable_HEK293_PAClight1_10	stable_HEK293_PAClight1	10	300	5718.72
HEK293_PACight1_PACAP38_A10_A10_010.fcs	HEK293_PACight1_PACAP38_A10_A10_010.fcs	stable_HEK293_PAClight1_10	stable_HEK293_PAClight1	10	300	4162.08
HEK293_PACight1_PACAP38_A10_A10_010.fcs	HEK293_PACight1_PACAP38_A10_A10_010.fcs	stable_HEK293_PAClight1_10	stable_HEK293_PAClight1	10	300	14306.5
HEK293_PACight1_PACAP38_A10_A10_010.fcs	HEK293_PACight1_PACAP38_A10_A10_010.fcs	stable_HEK293_PAClight1_10	stable_HEK293_PAClight1	10	300	427.8
HEK293_PACight1_PACAP38_A10_A10_010.fcs	HEK293_PACight1_PACAP38_A10_A10_010.fcs	stable_HEK293_PAClight1_10	stable_HEK293_PAClight1	10	300	3491.4
HEK293_PACight1_PACAP38_A10_A10_010.fcs	HEK293_PACight1_PACAP38_A10_A10_010.fcs	stable_HEK293_PAClight1_10	stable_HEK293_PAClight1	10	300	2768.28
HEK293_PACight1_PACAP38_A10_A10_010.fcs	HEK293_PACight1_PACAP38_A10_A10_010.fcs	stable_HEK293_PAClight1_10	stable_HEK293_PAClight1	10	300	4391.16
HEK293_PACight1_PACAP38_A10_A10_010.fcs	HEK293_PACight1_PACAP38_A10_A10_010.fcs	stable_HEK293_PAClight1_10	stable_HEK293_PAClight1	10	300	5037
HEK293_PACight1_PACAP38_A10_A10_010.fcs	HEK293_PACight1_PACAP38_A10_A10_010.fcs	stable_HEK293_PAClight1_10	stable_HEK293_PAClight1	10	300	2546.1
HEK293_PACight1_PACAP38_A10_A10_010.fcs	HEK293_PACight1_PACAP38_A10_A10_010.fcs	stable_HEK293_PAClight1_10	stable_HEK293_PAClight1	10	300	6364.56
HEK293_PACight1_PACAP38_A10_A10_010.fcs	HEK293_PACight1_PACAP38_A10_A10_010.fcs	stable_HEK293_PAClight1_10	stable_HEK293_PAClight1	10	300	6894.48
HEK293_PACight1_PACAP38_A10_A10_010.fcs	HEK293_PACight1_PACAP38_A10_A10_010.fcs	stable_HEK293_PAClight1_10	stable_HEK293_PAClight1	10	300	3605.94
HEK293_PACight1_PACAP38_A10_A10_010.fcs	HEK293_PACight1_PACAP38_A10_A10_010.fcs	stable_HEK293_PAClight1_10	stable_HEK293_PAClight1	10	300	3150.54
HEK293_PACight1_PACAP38_A10_A10_010.fcs	HEK293_PACight1_PACAP38_A10_A10_010.fcs	stable_HEK293_PAClight1_10	stable_HEK293_PAClight1	10	300	2788.98
HEK293_PACight1_PACAP38_A10_A10_010.fcs	HEK293_PACight1_PACAP38_A10_A10_010.fcs	stable_HEK293_PAClight1_10	stable_HEK293_PAClight1	10	300	3233.34
HEK293_PACight1_PACAP38_A10_A10_010.fcs	HEK293_PACight1_PACAP38_A10_A10_010.fcs	stable_HEK293_PAClight1_10	stable_HEK293_PAClight1	10	300	6168.6
HEK293_PACight1_PACAP38_A10_A10_010.fcs	HEK293_PACight1_PACAP38_A10_A10_010.fcs	stable_HEK293_PAClight1_10	stable_HEK293_PAClight1	10	300	7699.02
HEK293_PACight1_PACAP38_A10_A10_010.fcs	HEK293_PACight1_PACAP38_A10_A10_010.fcs	stable_HEK293_PAClight1_10	stable_HEK293_PAClight1	10	300	1794
HEK293_PACight1_PACAP38_A10_A10_010.fcs	HEK293_PACight1_PACAP38_A10_A10_010.fcs	stable_HEK293_PAClight1_10	stable_HEK293_PAClight1	10	300	1472.46
[truncated: 451,574+ more rows]

## Sheet: c
.rownames	name	construct	peptide	well_col	FITC-A
HEK293_PAClight2_G10_G10_045.fcs	HEK293_PAClight2_G10_G10_045.fcs	PAClight2	P38	10	126.72
HEK293_PAClight2_G10_G10_045.fcs	HEK293_PAClight2_G10_G10_045.fcs	PAClight2	P38	10	5091.84
HEK293_PAClight2_G10_G10_045.fcs	HEK293_PAClight2_G10_G10_045.fcs	PAClight2	P38	10	12729.6
HEK293_PAClight2_G10_G10_045.fcs	HEK293_PAClight2_G10_G10_045.fcs	PAClight2	P38	10	9194.4
HEK293_PAClight2_G10_G10_045.fcs	HEK293_PAClight2_G10_G10_045.fcs	PAClight2	P38	10	4567.68
HEK293_PAClight2_G10_G10_045.fcs	HEK293_PAClight2_G10_G10_045.fcs	PAClight2	P38	10	7104.96
HEK293_PAClight2_G10_G10_045.fcs	HEK293_PAClight2_G10_G10_045.fcs	PAClight2	P38	10	5693.76
HEK293_PAClight2_G10_G10_045.fcs	HEK293_PAClight2_G10_G10_045.fcs	PAClight2	P38	10	9256.32
HEK293_PAClight2_G10_G10_045.fcs	HEK293_PAClight2_G10_G10_045.fcs	PAClight2	P38	10	4649.76
HEK293_PAClight2_G10_G10_045.fcs	HEK293_PAClight2_G10_G10_045.fcs	PAClight2	P38	10	3267.36
HEK293_PAClight2_G10_G10_045.fcs	HEK293_PAClight2_G10_G10_045.fcs	PAClight2	P38	10	15798.2
HEK293_PAClight2_G10_G10_045.fcs	HEK293_PAClight2_G10_G10_045.fcs	PAClight2	P38	10	3208.32
HEK293_PAClight2_G10_G10_045.fcs	HEK293_PAClight2_G10_G10_045.fcs	PAClight2	P38	10	10454.4
HEK293_PAClight2_G10_G10_045.fcs	HEK293_PAClight2_G10_G10_045.fcs	PAClight2	P38	10	8785.44
HEK293_PAClight2_G10_G10_045.fcs	HEK293_PAClight2_G10_G10_045.fcs	PAClight2	P38	10	53892
HEK293_PAClight2_G10_G10_045.fcs	HEK293_PAClight2_G10_G10_045.fcs	PAClight2	P38	10	3407.04
HEK293_PAClight2_G10_G10_045.fcs	HEK293_PAClight2_G10_G10_045.fcs	PAClight2	P38	10	4462.56
HEK293_PAClight2_G10_G10_045.fcs	HEK293_PAClight2_G10_G10_045.fcs	PAClight2	P38	10	560.16
HEK293_PAClight2_G10_G10_045.fcs	HEK293_PAClight2_G10_G10_045.fcs	PAClight2	P38	10	10529.3
HEK293_PAClight2_G10_G10_045.fcs	HEK293_PAClight2_G10_G10_045.fcs	PAClight2	P38	10	10393.9
HEK293_PAClight2_G10_G10_045.fcs	HEK293_PAClight2_G10_G10_045.fcs	PAClight2	P38	10	6694.56
HEK293_PAClight2_G10_G10_045.fcs	HEK293_PAClight2_G10_G10_045.fcs	PAClight2	P38	10	4219.2
HEK293_PAClight2_G10_G10_045.fcs	HEK293_PAClight2_G10_G10_045.fcs	PAClight2	P38	10	7698.24
HEK293_PAClight2_G10_G10_045.fcs	HEK293_PAClight2_G10_G10_045.fcs	PAClight2	P38	10	3147.84
HEK293_PAClight2_G10_G10_045.fcs	HEK293_PAClight2_G10_G10_045.fcs	PAClight2	P38	10	23094.7
HEK293_PAClight2_G10_G10_045.fcs	HEK293_PAClight2_G10_G10_045.fcs	PAClight2	P38	10	5878.08
HEK293_PAClight2_G10_G10_045.fcs	HEK293_PAClight2_G10_G10_045.fcs	PAClight2	P38	10	11249.3
HEK293_PAClight2_G10_G10_045.fcs	HEK293_PAClight2_G10_G10_045.fcs	PAClight2	P38	10	7365.6
HEK293_PAClight2_G10_G10_045.fcs	HEK293_PAClight2_G10_G10_045.fcs	PAClight2	P38	10	13832.6
HEK293_PAClight2_G10_G10_045.fcs	HEK293_PAClight2_G10_G10_045.fcs	PAClight2	P38	10	5294.88
HEK293_PAClight2_G10_G10_045.fcs	HEK293_PAClight2_G10_G10_045.fcs	PAClight2	P38	10	11414.9
HEK293_PAClight2_G10_G10_045.fcs	HEK293_PAClight2_G10_G10_045.fcs	PAClight2	P38	10	9142.56
HEK293_PAClight2_G10_G10_045.fcs	HEK293_PAClight2_G10_G10_045.fcs	PAClight2	P38	10	8176.32
HEK293_PAClight2_G10_G10_045.fcs	HEK293_PAClight2_G10_G10_045.fcs	PAClight2	P38	10	12499.2
HEK293_PAClight2_G10_G10_045.fcs	HEK293_PAClight2_G10_G10_045.fcs	PAClight2	P38	10	7771.68
HEK293_PAClight2_G10_G10_045.fcs	HEK293_PAClight2_G10_G10_045.fcs	PAClight2	P38	10	4468.32
HEK293_PAClight2_G10_G10_045.fcs	HEK293_PAClight2_G10_G10_045.fcs	PAClight2	P38	10	28.8
HEK293_PAClight2_G10_G10_045.fcs	HEK293_PAClight2_G10_G10_045.fcs	PAClight2	P38	10	10766.9
HEK293_PAClight2_G10_G10_045.fcs	HEK293_PAClight2_G10_G10_045.fcs	PAClight2	P38	10	4999.68
HEK293_PAClight2_G10_G10_045.fcs	HEK293_PAClight2_G10_G10_045.fcs	PAClight2	P38	10	13952.2
HEK293_PAClight2_G10_G10_045.fcs	HEK293_PAClight2_G10_G10_045.fcs	PAClight2	P38	10	18154.1
HEK293_PAClight2_G10_G10_045.fcs	HEK293_PAClight2_G10_G10_045.fcs	PAClight2	P38	10	11255
HEK293_PAClight2_G10_G10_045.fcs	HEK293_PAClight2_G10_G10_045.fcs	PAClight2	P38	10	5241.6
HEK293_PAClight2_G10_G10_045.fcs	HEK293_PAClight2_G10_G10_045.fcs	PAClight2	P38	10	7564.32
HEK293_PAClight2_G10_G10_045.fcs	HEK293_PAClight2_G10_G10_045.fcs	PAClight2	P38	10	8366.4
HEK293_PAClight2_G10_G10_045.fcs	HEK293_PAClight2_G10_G10_045.fcs	PAClight2	P38	10	11495.5
HEK293_PAClight2_G10_G10_045.fcs	HEK293_PAClight2_G10_G10_045.fcs	PAClight2	P38	10	8704.8
HEK293_PAClight2_G10_G10_045.fcs	HEK293_PAClight2_G10_G10_045.fcs	PAClight2	P38	10	4710.24
HEK293_PAClight2_G10_G10_045.fcs	HEK293_PAClight2_G10_G10_045.fcs	PAClight2	P38	10	13315.7
HEK293_PAClight2_G10_G10_045.fcs	HEK293_PAClight2_G10_G10_045.fcs	PAClight2	P38	10	7132.32
HEK293_PAClight2_G10_G10_045.fcs	HEK293_PAClight2_G10_G10_045.fcs	PAClight2	P38	10	9881.28
HEK293_PAClight2_G10_G10_045.fcs	HEK293_PAClight2_G10_G10_045.fcs	PAClight2	P38	10	11275.2
HEK293_PAClight2_G10_G10_045.fcs	HEK293_PAClight2_G10_G10_045.fcs	PAClight2	P38	10	5925.6
HEK293_PAClight2_G10_G10_045.fcs	HEK293_PAClight2_G10_G10_045.fcs	PAClight2	P38	10	11589.1
HEK293_PAClight2_G10_G10_045.fcs	HEK293_PAClight2_G10_G10_045.fcs	PAClight2	P38	10	8496
HEK293_PAClight2_G10_G10_045.fcs	HEK293_PAClight2_G10_G10_045.fcs	PAClight2	P38	10	6775.2
HEK293_PAClight2_G10_G10_045.fcs	HEK293_PAClight2_G10_G10_045.fcs	PAClight2	P38	10	9073.44
HEK293_PAClight2_G10_G10_045.fcs	HEK293_PAClight2_G10_G10_045.fcs	PAClight2	P38	10	17071.2
HEK293_PAClight2_G10_G10_045.fcs	HEK293_PAClight2_G10_G10_045.fcs	PAClight2	P38	10	15498.7
HEK293_PAClight2_G10_G10_045.fcs	HEK293_PAClight2_G10_G10_045.fcs	PAClight2	P38	10	105.12
HEK293_PAClight2_G10_G10_045.fcs	HEK293_PAClight2_G10_G10_045.fcs	PAClight2	P38	10	1687.68
HEK293_PAClight2_G10_G10_045.fcs	HEK293_PAClight2_G10_G10_045.fcs	PAClight2	P38	10	4680
HEK293_PAClight2_G10_G10_045.fcs	HEK293_PAClight2_G10_G10_045.fcs	PAClight2	P38	10	2626.56
HEK293_PAClight2_G10_G10_045.fcs	HEK293_PAClight2_G10_G10_045.fcs	PAClight2	P38	10	4443.84
HEK293_PAClight2_G10_G10_045.fcs	HEK293_PAClight2_G10_G10_045.fcs	PAClight2	P38	10	411.84
HEK293_PAClight2_G10_G10_045.fcs	HEK293_PAClight2_G10_G10_045.fcs	PAClight2	P38	10	54.72
HEK293_PAClight2_G10_G10_045.fcs	HEK293_PAClight2_G10_G10_045.fcs	PAClight2	P38	10	8602.56
HEK293_PAClight2_G10_G10_045.fcs	HEK293_PAClight2_G10_G10_045.fcs	PAClight2	P38	10	13363.2
HEK293_PAClight2_G10_G10_045.fcs	HEK293_PAClight2_G10_G10_045.fcs	PAClight2	P38	10	6451.2
HEK293_PAClight2_G10_G10_045.fcs	HEK293_PAClight2_G10_G10_045.fcs	PAClight2	P38	10	12911
HEK293_PAClight2_G10_G10_045.fcs	HEK293_PAClight2_G10_G10_045.fcs	PAClight2	P38	10	9718.56
HEK293_PAClight2_G10_G10_045.fcs	HEK293_PAClight2_G10_G10_045.fcs	PAClight2	P38	10	9214.56
HEK293_PAClight2_G10_G10_045.fcs	HEK293_PAClight2_G10_G10_045.fcs	PAClight2	P38	10	13609.4
HEK293_PAClight2_G10_G10_045.fcs	HEK293_PAClight2_G10_G10_045.fcs	PAClight2	P38	10	24367.7
HEK293_PAClight2_G10_G10_045.fcs	HEK293_PAClight2_G10_G10_045.fcs	PAClight2	P38	10	8372.16
HEK293_PAClight2_G10_G10_045.fcs	HEK293_PAClight2_G10_G10_045.fcs	PAClight2	P38	10	10650.2
HEK293_PAClight2_G10_G10_045.fcs	HEK293_PAClight2_G10_G10_045.fcs	PAClight2	P38	10	15615.4
HEK293_PAClight2_G10_G10_045.fcs	HEK293_PAClight2_G10_G10_045.fcs	PAClight2	P38	10	11465.3
HEK293_PAClight2_G10_G10_045.fcs	HEK293_PAClight2_G10_G10_045.fcs	PAClight2	P38	10	7591.68
HEK293_PAClight2_G10_G10_045.fcs	HEK293_PAClight2_G10_G10_045.fcs	PAClight2	P38	10	15756.5
HEK293_PAClight2_G10_G10_045.fcs	HEK293_PAClight2_G10_G10_045.fcs	PAClight2	P38	10	25066.1
HEK293_PAClight2_G10_G10_045.fcs	HEK293_PAClight2_G10_G10_045.fcs	PAClight2	P38	10	24569.3
HEK293_PAClight2_G10_G10_045.fcs	HEK293_PAClight2_G10_G10_045.fcs	PAClight2	P38	10	20730.2
HEK293_PAClight2_G10_G10_045.fcs	HEK293_PAClight2_G10_G10_045.fcs	PAClight2	P38	10	15035
HEK293_PAClight2_G10_G10_045.fcs	HEK293_PAClight2_G10_G10_045.fcs	PAClight2	P38	10	7554.24
HEK293_PAClight2_G10_G10_045.fcs	HEK293_PAClight2_G10_G10_045.fcs	PAClight2	P38	10	1383.84
HEK293_PAClight2_G10_G10_045.fcs	HEK293_PAClight2_G10_G10_045.fcs	PAClight2	P38	10	24585.1
HEK293_PAClight2_G10_G10_045.fcs	HEK293_PAClight2_G10_G10_045.fcs	PAClight2	P38	10	6672.96
HEK293_PAClight2_G10_G10_045.fcs	HEK293_PAClight2_G10_G10_045.fcs	PAClight2	P38	10	20763.4
HEK293_PAClight2_G10_G10_045.fcs	HEK293_PAClight2_G10_G10_045.fcs	PAClight2	P38	10	8375.04
HEK293_PAClight2_G10_G10_045.fcs	HEK293_PAClight2_G10_G10_045.fcs	PAClight2	P38	10	15709
HEK293_PAClight2_G10_G10_045.fcs	HEK293_PAClight2_G10_G10_045.fcs	PAClight2	P38	10	12545.3
HEK293_PAClight2_G10_G10_045.fcs	HEK293_PAClight2_G10_G10_045.fcs	PAClight2	P38	10	11148.5
HEK293_PAClight2_G10_G10_045.fcs	HEK293_PAClight2_G10_G10_045.fcs	PAClight2	P38	10	11180.2
HEK293_PAClight2_G10_G10_045.fcs	HEK293_PAClight2_G10_G10_045.fcs	PAClight2	P38	10	7570.08
HEK293_PAClight2_G10_G10_045.fcs	HEK293_PAClight2_G10_G10_045.fcs	PAClight2	P38	10	1666.08
HEK293_PAClight2_G10_G10_045.fcs	HEK293_PAClight2_G10_G10_045.fcs	PAClight2	P38	10	42235.2
HEK293_PAClight2_G10_G10_045.fcs	HEK293_PAClight2_G10_G10_045.fcs	PAClight2	P38	10	7253.28
HEK293_PAClight2_G10_G10_045.fcs	HEK293_PAClight2_G10_G10_045.fcs	PAClight2	P38	10	12407
HEK293_PAClight2_G10_G10_045.fcs	HEK293_PAClight2_G10_G10_045.fcs	PAClight2	P38	10	9234.72
HEK293_PAClight2_G10_G10_045.fcs	HEK293_PAClight2_G10_G10_045.fcs	PAClight2	P38	10	6210.72
HEK293_PAClight2_G10_G10_045.fcs	HEK293_PAClight2_G10_G10_045.fcs	PAClight2	P38	10	18781.9
HEK293_PAClight2_G10_G10_045.fcs	HEK293_PAClight2_G10_G10_045.fcs	PAClight2	P38	10	6127.2
HEK293_PAClight2_G10_G10_045.fcs	HEK293_PAClight2_G10_G10_045.fcs	PAClight2	P38	10	4980.96
HEK293_PAClight2_G10_G10_045.fcs	HEK293_PAClight2_G10_G10_045.fcs	PAClight2	P38	10	6579.36
HEK293_PAClight2_G10_G10_045.fcs	HEK293_PAClight2_G10_G10_045.fcs	PAClight2	P38	10	8969.76
HEK293_PAClight2_G10_G10_045.fcs	HEK293_PAClight2_G10_G10_045.fcs	PAClight2	P38	10	5207.04
HEK293_PAClight2_G10_G10_045.fcs	HEK293_PAClight2_G10_G10_045.fcs	PAClight2	P38	10	3558.24
HEK293_PAClight2_G10_G10_045.fcs	HEK293_PAClight2_G10_G10_045.fcs	PAClight2	P38	10	8683.2
HEK293_PAClight2_G10_G10_045.fcs	HEK293_PAClight2_G10_G10_045.fcs	PAClight2	P38	10	11893
HEK293_PAClight2_G10_G10_045.fcs	HEK293_PAClight2_G10_G10_045.fcs	PAClight2	P38	10	3883.68
HEK293_PAClight2_G10_G10_045.fcs	HEK293_PAClight2_G10_G10_045.fcs	PAClight2	P38	10	581.76
HEK293_PAClight2_G10_G10_045.fcs	HEK293_PAClight2_G10_G10_045.fcs	PAClight2	P38	10	10455.8
HEK293_PAClight2_G10_G10_045.fcs	HEK293_PAClight2_G10_G10_045.fcs	PAClight2	P38	10	570.24
HEK293_PAClight2_G10_G10_045.fcs	HEK293_PAClight2_G10_G10_045.fcs	PAClight2	P38	10	8353.44
HEK293_PAClight2_G10_G10_045.fcs	HEK293_PAClight2_G10_G10_045.fcs	PAClight2	P38	10	8314.56
HEK293_PAClight2_G10_G10_045.fcs	HEK293_PAClight2_G10_G10_045.fcs	PAClight2	P38	10	13464
HEK293_PAClight2_G10_G10_045.fcs	HEK293_PAClight2_G10_G10_045.fcs	PAClight2	P38	10	7326.72
HEK293_PAClight2_G10_G10_045.fcs	HEK293_PAClight2_G10_G10_045.fcs	PAClight2	P38	10	5389.92
HEK293_PAClight2_G10_G10_045.fcs	HEK293_PAClight2_G10_G10_045.fcs	PAClight2	P38	10	7025.76
HEK293_PAClight2_G10_G10_045.fcs	HEK293_PAClight2_G10_G10_045.fcs	PAClight2	P38	10	9136.8
HEK293_PAClight2_G10_G10_045.fcs	HEK293_PAClight2_G10_G10_045.fcs	PAClight2	P38	10	4775.04
HEK293_PAClight2_G10_G10_045.fcs	HEK293_PAClight2_G10_G10_045.fcs	PAClight2	P38	10	6770.88
HEK293_PAClight2_G10_G10_045.fcs	HEK293_PAClight2_G10_G10_045.fcs	PAClight2	P38	10	5862.24
HEK293_PAClight2_G10_G10_045.fcs	HEK293_PAClight2_G10_G10_045.fcs	PAClight2	P38	10	5315.04
HEK293_PAClight2_G10_G10_045.fcs	HEK293_PAClight2_G10_G10_045.fcs	PAClight2	P38	10	4008.96
HEK293_PAClight2_G10_G10_045.fcs	HEK293_PAClight2_G10_G10_045.fcs	PAClight2	P38	10	8298.72
HEK293_PAClight2_G10_G10_045.fcs	HEK293_PAClight2_G10_G10_045.fcs	PAClight2	P38	10	9547.2
HEK293_PAClight2_G10_G10_045.fcs	HEK293_PAClight2_G10_G10_045.fcs	PAClight2	P38	10	4380.48
HEK293_PAClight2_G10_G10_045.fcs	HEK293_PAClight2_G10_G10_045.fcs	PAClight2	P38	10	10130.4
HEK293_PAClight2_G10_G10_045.fcs	HEK293_PAClight2_G10_G10_045.fcs	PAClight2	P38	10	41.76
HEK293_PAClight2_G10_G10_045.fcs	HEK293_PAClight2_G10_G10_045.fcs	PAClight2	P38	10	13802.4
HEK293_PAClight2_G10_G10_045.fcs	HEK293_PAClight2_G10_G10_045.fcs	PAClight2	P38	10	2679.84
HEK293_PAClight2_G10_G10_045.fcs	HEK293_PAClight2_G10_G10_045.fcs	PAClight2	P38	10	6377.76
HEK293_PAClight2_G10_G10_045.fcs	HEK293_PAClight2_G10_G10_045.fcs	PAClight2	P38	10	11416.3
HEK293_PAClight2_G10_G10_045.fcs	HEK293_PAClight2_G10_G10_045.fcs	PAClight2	P38	10	19866.2
HEK293_PAClight2_G10_G10_045.fcs	HEK293_PAClight2_G10_G10_045.fcs	PAClight2	P38	10	725.76
HEK293_PAClight2_G10_G10_045.fcs	HEK293_PAClight2_G10_G10_045.fcs	PAClight2	P38	10	11060.6
HEK293_PAClight2_G10_G10_045.fcs	HEK293_PAClight2_G10_G10_045.fcs	PAClight2	P38	10	13204.8
HEK293_PAClight2_G10_G10_045.fcs	HEK293_PAClight2_G10_G10_045.fcs	PAClight2	P38	10	18544.3
HEK293_PAClight2_G10_G10_045.fcs	HEK293_PAClight2_G10_G10_045.fcs	PAClight2	P38	10	4318.56
HEK293_PAClight2_G10_G10_045.fcs	HEK293_PAClight2_G10_G10_045.fcs	PAClight2	P38	10	4127.04
HEK293_PAClight2_G10_G10_045.fcs	HEK293_PAClight2_G10_G10_045.fcs	PAClight2	P38	10	123.84
HEK293_PAClight2_G10_G10_045.fcs	HEK293_PAClight2_G10_G10_045.fcs	PAClight2	P38	10	8782.56
HEK293_PAClight2_G10_G10_045.fcs	HEK293_PAClight2_G10_G10_045.fcs	PAClight2	P38	10	6377.76
HEK293_PAClight2_G10_G10_045.fcs	HEK293_PAClight2_G10_G10_045.fcs	PAClight2	P38	10	10391
HEK293_PAClight2_G10_G10_045.fcs	HEK293_PAClight2_G10_G10_045.fcs	PAClight2	P38	10	610.56
HEK293_PAClight2_G10_G10_045.fcs	HEK293_PAClight2_G10_G10_045.fcs	PAClight2	P38	10	7555.68
HEK293_PAClight2_G10_G10_045.fcs	HEK293_PAClight2_G10_G10_045.fcs	PAClight2	P38	10	10442.9
HEK293_PAClight2_G10_G10_045.fcs	HEK293_PAClight2_G10_G10_045.fcs	PAClight2	P38	10	9976.32
HEK293_PAClight2_G10_G10_045.fcs	HEK293_PAClight2_G10_G10_045.fcs	PAClight2	P38	10	11548.8
HEK293_PAClight2_G10_G10_045.fcs	HEK293_PAClight2_G10_G10_045.fcs	PAClight2	P38	10	8553.6
HEK293_PAClight2_G10_G10_045.fcs	HEK293_PAClight2_G10_G10_045.fcs	PAClight2	P38	10	11082.2
HEK293_PAClight2_G10_G10_045.fcs	HEK293_PAClight2_G10_G10_045.fcs	PAClight2	P38	10	8832.96
HEK293_PAClight2_G10_G10_045.fcs	HEK293_PAClight2_G10_G10_045.fcs	PAClight2	P38	10	4131.36
HEK293_PAClight2_G10_G10_045.fcs	HEK293_PAClight2_G10_G10_045.fcs	PAClight2	P38	10	131.04
HEK293_PAClight2_G10_G10_045.fcs	HEK293_PAClight2_G10_G10_045.fcs	PAClight2	P38	10	23859.4
HEK293_PAClight2_G10_G10_045.fcs	HEK293_PAClight2_G10_G10_045.fcs	PAClight2	P38	10	10355
HEK293_PAClight2_G10_G10_045.fcs	HEK293_PAClight2_G10_G10_045.fcs	PAClight2	P38	10	7040.16
HEK293_PAClight2_G10_G10_045.fcs	HEK293_PAClight2_G10_G10_045.fcs	PAClight2	P38	10	20422.1
HEK293_PAClight2_G10_G10_045.fcs	HEK293_PAClight2_G10_G10_045.fcs	PAClight2	P38	10	10362.2
HEK293_PAClight2_G10_G10_045.fcs	HEK293_PAClight2_G10_G10_045.fcs	PAClight2	P38	10	4883.04
HEK293_PAClight2_G10_G10_045.fcs	HEK293_PAClight2_G10_G10_045.fcs	PAClight2	P38	10	11387.5
HEK293_PAClight2_G10_G10_045.fcs	HEK293_PAClight2_G10_G10_045.fcs	PAClight2	P38	10	22718.9
HEK293_PAClight2_G10_G10_045.fcs	HEK293_PAClight2_G10_G10_045.fcs	PAClight2	P38	10	6808.32
HEK293_PAClight2_G10_G10_045.fcs	HEK293_PAClight2_G10_G10_045.fcs	PAClight2	P38	10	7341.12
HEK293_PAClight2_G10_G10_045.fcs	HEK293_PAClight2_G10_G10_045.fcs	PAClight2	P38	10	8244
HEK293_PAClight2_G10_G10_045.fcs	HEK293_PAClight2_G10_G10_045.fcs	PAClight2	P38	10	8776.8
HEK293_PAClight2_G10_G10_045.fcs	HEK293_PAClight2_G10_G10_045.fcs	PAClight2	P38	10	13769.3
HEK293_PAClight2_G10_G10_045.fcs	HEK293_PAClight2_G10_G10_045.fcs	PAClight2	P38	10	604.8
HEK293_PAClight2_G10_G10_045.fcs	HEK293_PAClight2_G10_G10_045.fcs	PAClight2	P38	10	6572.16
HEK293_PAClight2_G10_G10_045.fcs	HEK293_PAClight2_G10_G10_045.fcs	PAClight2	P38	10	9207.36
HEK293_PAClight2_G10_G10_045.fcs	HEK293_PAClight2_G10_G10_045.fcs	PAClight2	P38	10	7862.4
HEK293_PAClight2_G10_G10_045.fcs	HEK293_PAClight2_G10_G10_045.fcs	PAClight2	P38	10	6683.04
HEK293_PAClight2_G10_G10_045.fcs	HEK293_PAClight2_G10_G10_045.fcs	PAClight2	P38	10	8681.76
HEK293_PAClight2_G10_G10_045.fcs	HEK293_PAClight2_G10_G10_045.fcs	PAClight2	P38	10	3526.56
HEK293_PAClight2_G10_G10_045.fcs	HEK293_PAClight2_G10_G10_045.fcs	PAClight2	P38	10	228.96
HEK293_PAClight2_G10_G10_045.fcs	HEK293_PAClight2_G10_G10_045.fcs	PAClight2	P38	10	13602.2
HEK293_PAClight2_G10_G10_045.fcs	HEK293_PAClight2_G10_G10_045.fcs	PAClight2	P38	10	3558.24
HEK293_PAClight2_G10_G10_045.fcs	HEK293_PAClight2_G10_G10_045.fcs	PAClight2	P38	10	6628.32
HEK293_PAClight2_G10_G10_045.fcs	HEK293_PAClight2_G10_G10_045.fcs	PAClight2	P38	10	12780
HEK293_PAClight2_G10_G10_045.fcs	HEK293_PAClight2_G10_G10_045.fcs	PAClight2	P38	10	17399.5
HEK293_PAClight2_G10_G10_045.fcs	HEK293_PAClight2_G10_G10_045.fcs	PAClight2	P38	10	9725.76
HEK293_PAClight2_G10_G10_045.fcs	HEK293_PAClight2_G10_G10_045.fcs	PAClight2	P38	10	12352.3
HEK293_PAClight2_G10_G10_045.fcs	HEK293_PAClight2_G10_G10_045.fcs	PAClight2	P38	10	5273.28
HEK293_PAClight2_G10_G10_045.fcs	HEK293_PAClight2_G10_G10_045.fcs	PAClight2	P38	10	7535.52
HEK293_PAClight2_G10_G10_045.fcs	HEK293_PAClight2_G10_G10_045.fcs	PAClight2	P38	10	103.68
HEK293_PAClight2_G10_G10_045.fcs	HEK293_PAClight2_G10_G10_045.fcs	PAClight2	P38	10	5706.72
HEK293_PAClight2_G10_G10_045.fcs	HEK293_PAClight2_G10_G10_045.fcs	PAClight2	P38	10	164.16
HEK293_PAClight2_G10_G10_045.fcs	HEK293_PAClight2_G10_G10_045.fcs	PAClight2	P38	10	8697.6
HEK293_PAClight2_G10_G10_045.fcs	HEK293_PAClight2_G10_G10_045.fcs	PAClight2	P38	10	12013.9
HEK293_PAClight2_G10_G10_045.fcs	HEK293_PAClight2_G10_G10_045.fcs	PAClight2	P38	10	2475.36
HEK293_PAClight2_G10_G10_045.fcs	HEK293_PAClight2_G10_G10_045.fcs	PAClight2	P38	10	19738.1
HEK293_PAClight2_G10_G10_045.fcs	HEK293_PAClight2_G10_G10_045.fcs	PAClight2	P38	10	9347.04
HEK293_PAClight2_G10_G10_045.fcs	HEK293_PAClight2_G10_G10_045.fcs	PAClight2	P38	10	5437.44
HEK293_PAClight2_G10_G10_045.fcs	HEK293_PAClight2_G10_G10_045.fcs	PAClight2	P38	10	28880.6
HEK293_PAClight2_G10_G10_045.fcs	HEK293_PAClight2_G10_G10_045.fcs	PAClight2	P38	10	9560.16
HEK293_PAClight2_G10_G10_045.fcs	HEK293_PAClight2_G10_G10_045.fcs	PAClight2	P38	10	452.16
HEK293_PAClight2_G10_G10_045.fcs	HEK293_PAClight2_G10_G10_045.fcs	PAClight2	P38	10	9876.96
HEK293_PAClight2_G10_G10_045.fcs	HEK293_PAClight2_G10_G10_045.fcs	PAClight2	P38	10	22904.6
HEK293_PAClight2_G10_G10_045.fcs	HEK293_PAClight2_G10_G10_045.fcs	PAClight2	P38	10	4641.12
HEK293_PAClight2_G10_G10_045.fcs	HEK293_PAClight2_G10_G10_045.fcs	PAClight2	P38	10	28002.2
HEK293_PAClight2_G10_G10_045.fcs	HEK293_PAClight2_G10_G10_045.fcs	PAClight2	P38	10	12454.6
HEK293_PAClight2_G10_G10_045.fcs	HEK293_PAClight2_G10_G10_045.fcs	PAClight2	P38	10	3260.16
HEK293_PAClight2_G10_G10_045.fcs	HEK293_PAClight2_G10_G10_045.fcs	PAClight2	P38	10	4970.88
HEK293_PAClight2_G10_G10_045.fcs	HEK293_PAClight2_G10_G10_045.fcs	PAClight2	P38	10	10608.5
HEK293_PAClight2_G10_G10_045.fcs	HEK293_PAClight2_G10_G10_045.fcs	PAClight2	P38	10	5739.84
HEK293_PAClight2_G10_G10_045.fcs	HEK293_PAClight2_G10_G10_045.fcs	PAClight2	P38	10	10890.7
HEK293_PAClight2_G10_G10_045.fcs	HEK293_PAClight2_G10_G10_045.fcs	PAClight2	P38	10	6946.56
HEK293_PAClight2_G10_G10_045.fcs	HEK293_PAClight2_G10_G10_045.fcs	PAClight2	P38	10	7135.2
HEK293_PAClight2_G10_G10_045.fcs	HEK293_PAClight2_G10_G10_045.fcs	PAClight2	P38	10	7793.28
HEK293_PAClight2_G10_G10_045.fcs	HEK293_PAClight2_G10_G10_045.fcs	PAClight2	P38	10	8615.52
HEK293_PAClight2_G10_G10_045.fcs	HEK293_PAClight2_G10_G10_045.fcs	PAClight2	P38	10	8049.6
HEK293_PAClight2_G10_G10_045.fcs	HEK293_PAClight2_G10_G10_045.fcs	PAClight2	P38	10	5372.64
HEK293_PAClight2_G10_G10_045.fcs	HEK293_PAClight2_G10_G10_045.fcs	PAClight2	P38	10	4714.56
HEK293_PAClight2_G10_G10_045.fcs	HEK293_PAClight2_G10_G10_045.fcs	PAClight2	P38	10	113.76
HEK293_PAClight2_G10_G10_045.fcs	HEK293_PAClight2_G10_G10_045.fcs	PAClight2	P38	10	20596.3
HEK293_PAClight2_G10_G10_045.fcs	HEK293_PAClight2_G10_G10_045.fcs	PAClight2	P38	10	10033.9
HEK293_PAClight2_G10_G10_045.fcs	HEK293_PAClight2_G10_G10_045.fcs	PAClight2	P38	10	9609.12
HEK293_PAClight2_G10_G10_045.fcs	HEK293_PAClight2_G10_G10_045.fcs	PAClight2	P38	10	1609.92
HEK293_PAClight2_G10_G10_045.fcs	HEK293_PAClight2_G10_G10_045.fcs	PAClight2	P38	10	5656.32
HEK293_PAClight2_G10_G10_045.fcs	HEK293_PAClight2_G10_G10_045.fcs	PAClight2	P38	10	5736.96
HEK293_PAClight2_G10_G10_045.fcs	HEK293_PAClight2_G10_G10_045.fcs	PAClight2	P38	10	2062.08
HEK293_PAClight2_G10_G10_045.fcs	HEK293_PAClight2_G10_G10_045.fcs	PAClight2	P38	10	979.2
HEK293_PAClight2_G10_G10_045.fcs	HEK293_PAClight2_G10_G10_045.fcs	PAClight2	P38	10	6163.2
HEK293_PAClight2_G10_G10_045.fcs	HEK293_PAClight2_G10_G10_045.fcs	PAClight2	P38	10	9047.52
HEK293_PAClight2_G10_G10_045.fcs	HEK293_PAClight2_G10_G10_045.fcs	PAClight2	P38	10	5407.2
HEK293_PAClight2_G10_G10_045.fcs	HEK293_PAClight2_G10_G10_045.fcs	PAClight2	P38	10	9334.08
HEK293_PAClight2_G10_G10_045.fcs	HEK293_PAClight2_G10_G10_045.fcs	PAClight2	P38	10	21251.5
HEK293_PAClight2_G10_G10_045.fcs	HEK293_PAClight2_G10_G10_045.fcs	PAClight2	P38	10	17841.6
HEK293_PAClight2_G10_G10_045.fcs	HEK293_PAClight2_G10_G10_045.fcs	PAClight2	P38	10	576
HEK293_PAClight2_G10_G10_045.fcs	HEK293_PAClight2_G10_G10_045.fcs	PAClight2	P38	10	3984.48
HEK293_PAClight2_G10_G10_045.fcs	HEK293_PAClight2_G10_G10_045.fcs	PAClight2	P38	10	11635.2
HEK293_PAClight2_G10_G10_045.fcs	HEK293_PAClight2_G10_G10_045.fcs	PAClight2	P38	10	21002.4
HEK293_PAClight2_G10_G10_045.fcs	HEK293_PAClight2_G10_G10_045.fcs	PAClight2	P38	10	32050.1
HEK293_PAClight2_G10_G10_045.fcs	HEK293_PAClight2_G10_G10_045.fcs	PAClight2	P38	10	2377.44
HEK293_PAClight2_G10_G10_045.fcs	HEK293_PAClight2_G10_G10_045.fcs	PAClight2	P38	10	5535.36
HEK293_PAClight2_G10_G10_045.fcs	HEK293_PAClight2_G10_G10_045.fcs	PAClight2	P38	10	205.92
HEK293_PAClight2_G10_G10_045.fcs	HEK293_PAClight2_G10_G10_045.fcs	PAClight2	P38	10	6901.92
HEK293_PAClight2_G10_G10_045.fcs	HEK293_PAClight2_G10_G10_045.fcs	PAClight2	P38	10	7581.6
HEK293_PAClight2_G10_G10_045.fcs	HEK293_PAClight2_G10_G10_045.fcs	PAClight2	P38	10	4553.28
HEK293_PAClight2_G10_G10_045.fcs	HEK293_PAClight2_G10_G10_045.fcs	PAClight2	P38	10	7971.84
HEK293_PAClight2_G10_G10_045.fcs	HEK293_PAClight2_G10_G10_045.fcs	PAClight2	P38	10	7135.2
HEK293_PAClight2_G10_G10_045.fcs	HEK293_PAClight2_G10_G10_045.fcs	PAClight2	P38	10	14316.5
HEK293_PAClight2_G10_G10_045.fcs	HEK293_PAClight2_G10_G10_045.fcs	PAClight2	P38	10	6572.16
HEK293_PAClight2_G10_G10_045.fcs	HEK293_PAClight2_G10_G10_045.fcs	PAClight2	P38	10	8428.32
HEK293_PAClight2_G10_G10_045.fcs	HEK293_PAClight2_G10_G10_045.fcs	PAClight2	P38	10	6128.64
HEK293_PAClight2_G10_G10_045.fcs	HEK293_PAClight2_G10_G10_045.fcs	PAClight2	P38	10	64726.6
HEK293_PAClight2_G10_G10_045.fcs	HEK293_PAClight2_G10_G10_045.fcs	PAClight2	P38	10	17195
HEK293_PAClight2_G10_G10_045.fcs	HEK293_PAClight2_G10_G10_045.fcs	PAClight2	P38	10	10919.5
HEK293_PAClight2_G10_G10_045.fcs	HEK293_PAClight2_G10_G10_045.fcs	PAClight2	P38	10	14028.5
HEK293_PAClight2_G10_G10_045.fcs	HEK293_PAClight2_G10_G10_045.fcs	PAClight2	P38	10	9305.28
HEK293_PAClight2_G10_G10_045.fcs	HEK293_PAClight2_G10_G10_045.fcs	PAClight2	P38	10	5954.4
HEK293_PAClight2_G10_G10_045.fcs	HEK293_PAClight2_G10_G10_045.fcs	PAClight2	P38	10	10163.5
HEK293_PAClight2_G10_G10_045.fcs	HEK293_PAClight2_G10_G10_045.fcs	PAClight2	P38	10	13708.8
HEK293_PAClight2_G10_G10_045.fcs	HEK293_PAClight2_G10_G10_045.fcs	PAClight2	P38	10	1857.6
HEK293_PAClight2_G10_G10_045.fcs	HEK293_PAClight2_G10_G10_045.fcs	PAClight2	P38	10	18325.4
HEK293_PAClight2_G10_G10_045.fcs	HEK293_PAClight2_G10_G10_045.fcs	PAClight2	P38	10	4701.6
HEK293_PAClight2_G10_G10_045.fcs	HEK293_PAClight2_G10_G10_045.fcs	PAClight2	P38	10	12886.6
HEK293_PAClight2_G10_G10_045.fcs	HEK293_PAClight2_G10_G10_045.fcs	PAClight2	P38	10	7057.44
HEK293_PAClight2_G10_G10_045.fcs	HEK293_PAClight2_G10_G10_045.fcs	PAClight2	P38	10	7614.72
HEK293_PAClight2_G10_G10_045.fcs	HEK293_PAClight2_G10_G10_045.fcs	PAClight2	P38	10	3803.04
HEK293_PAClight2_G10_G10_045.fcs	HEK293_PAClight2_G10_G10_045.fcs	PAClight2	P38	10	3926.88
HEK293_PAClight2_G10_G10_045.fcs	HEK293_PAClight2_G10_G10_045.fcs	PAClight2	P38	10	11515.7
HEK293_PAClight2_G10_G10_045.fcs	HEK293_PAClight2_G10_G10_045.fcs	PAClight2	P38	10	3597.12
HEK293_PAClight2_G10_G10_045.fcs	HEK293_PAClight2_G10_G10_045.fcs	PAClight2	P38	10	7132.32
HEK293_PAClight2_G10_G10_045.fcs	HEK293_PAClight2_G10_G10_045.fcs	PAClight2	P38	10	10676.2
HEK293_PAClight2_G10_G10_045.fcs	HEK293_PAClight2_G10_G10_045.fcs	PAClight2	P38	10	10586.9
HEK293_PAClight2_G10_G10_045.fcs	HEK293_PAClight2_G10_G10_045.fcs	PAClight2	P38	10	9997.92
HEK293_PAClight2_G10_G10_045.fcs	HEK293_PAClight2_G10_G10_045.fcs	PAClight2	P38	10	6435.36
HEK293_PAClight2_G10_G10_045.fcs	HEK293_PAClight2_G10_G10_045.fcs	PAClight2	P38	10	9491.04
HEK293_PAClight2_G10_G10_045.fcs	HEK293_PAClight2_G10_G10_045.fcs	PAClight2	P38	10	20695.7
HEK293_PAClight2_G10_G10_045.fcs	HEK293_PAClight2_G10_G10_045.fcs	PAClight2	P38	10	10540.8
HEK293_PAClight2_G10_G10_045.fcs	HEK293_PAClight2_G10_G10_045.fcs	PAClight2	P38	10	1329.12
HEK293_PAClight2_G10_G10_045.fcs	HEK293_PAClight2_G10_G10_045.fcs	PAClight2	P38	10	6461.28
HEK293_PAClight2_G10_G10_045.fcs	HEK293_PAClight2_G10_G10_045.fcs	PAClight2	P38	10	8516.16
HEK293_PAClight2_G10_G10_045.fcs	HEK293_PAClight2_G10_G10_045.fcs	PAClight2	P38	10	11075
HEK293_PAClight2_G10_G10_045.fcs	HEK293_PAClight2_G10_G10_045.fcs	PAClight2	P38	10	6662.88
HEK293_PAClight2_G10_G10_045.fcs	HEK293_PAClight2_G10_G10_045.fcs	PAClight2	P38	10	12522.2
HEK293_PAClight2_G10_G10_045.fcs	HEK293_PAClight2_G10_G10_045.fcs	PAClight2	P38	10	239.04
HEK293_PAClight2_G10_G10_045.fcs	HEK293_PAClight2_G10_G10_045.fcs	PAClight2	P38	10	9859.68
HEK293_PAClight2_G10_G10_045.fcs	HEK293_PAClight2_G10_G10_045.fcs	PAClight2	P38	10	1869.12
HEK293_PAClight2_G10_G10_045.fcs	HEK293_PAClight2_G10_G10_045.fcs	PAClight2	P38	10	7539.84
HEK293_PAClight2_G10_G10_045.fcs	HEK293_PAClight2_G10_G10_045.fcs	PAClight2	P38	10	10412.6
HEK293_PAClight2_G10_G10_045.fcs	HEK293_PAClight2_G10_G10_045.fcs	PAClight2	P38	10	4147.2
HEK293_PAClight2_G10_G10_045.fcs	HEK293_PAClight2_G10_G10_045.fcs	PAClight2	P38	10	7493.76
HEK293_PAClight2_G10_G10_045.fcs	HEK293_PAClight2_G10_G10_045.fcs	PAClight2	P38	10	7427.52
HEK293_PAClight2_G10_G10_045.fcs	HEK293_PAClight2_G10_G10_045.fcs	PAClight2	P38	10	4903.2
HEK293_PAClight2_G10_G10_045.fcs	HEK293_PAClight2_G10_G10_045.fcs	PAClight2	P38	10	11378.9
HEK293_PAClight2_G10_G10_045.fcs	HEK293_PAClight2_G10_G10_045.fcs	PAClight2	P38	10	10985.8
HEK293_PAClight2_G10_G10_045.fcs	HEK293_PAClight2_G10_G10_045.fcs	PAClight2	P38	10	7318.08
HEK293_PAClight2_G10_G10_045.fcs	HEK293_PAClight2_G10_G10_045.fcs	PAClight2	P38	10	10209.6
HEK293_PAClight2_G10_G10_045.fcs	HEK293_PAClight2_G10_G10_045.fcs	PAClight2	P38	10	22957.9
HEK293_PAClight2_G10_G10_045.fcs	HEK293_PAClight2_G10_G10_045.fcs	PAClight2	P38	10	20007.4
HEK293_PAClight2_G10_G10_045.fcs	HEK293_PAClight2_G10_G10_045.fcs	PAClight2	P38	10	10072.8
HEK293_PAClight2_G10_G10_045.fcs	HEK293_PAClight2_G10_G10_045.fcs	PAClight2	P38	10	7597.44
HEK293_PAClight2_G10_G10_045.fcs	HEK293_PAClight2_G10_G10_045.fcs	PAClight2	P38	10	10753.9
HEK293_PAClight2_G10_G10_045.fcs	HEK293_PAClight2_G10_G10_045.fcs	PAClight2	P38	10	3712.32
HEK293_PAClight2_G10_G10_045.fcs	HEK293_PAClight2_G10_G10_045.fcs	PAClight2	P38	10	5914.08
HEK293_PAClight2_G10_G10_045.fcs	HEK293_PAClight2_G10_G10_045.fcs	PAClight2	P38	10	9420.48
HEK293_PAClight2_G10_G10_045.fcs	HEK293_PAClight2_G10_G10_045.fcs	PAClight2	P38	10	10192.3
HEK293_PAClight2_G10_G10_045.fcs	HEK293_PAClight2_G10_G10_045.fcs	PAClight2	P38	10	7132.32
HEK293_PAClight2_G10_G10_045.fcs	HEK293_PAClight2_G10_G10_045.fcs	PAClight2	P38	10	7331.04
HEK293_PAClight2_G10_G10_045.fcs	HEK293_PAClight2_G10_G10_045.fcs	PAClight2	P38	10	16675.2
HEK293_PAClight2_G10_G10_045.fcs	HEK293_PAClight2_G10_G10_045.fcs	PAClight2	P38	10	10501.9
HEK293_PAClight2_G10_G10_045.fcs	HEK293_PAClight2_G10_G10_045.fcs	PAClight2	P38	10	18817.9
HEK293_PAClight2_G10_G10_045.fcs	HEK293_PAClight2_G10_G10_045.fcs	PAClight2	P38	10	10909.4
HEK293_PAClight2_G10_G10_045.fcs	HEK293_PAClight2_G10_G10_045.fcs	PAClight2	P38	10	7885.44
HEK293_PAClight2_G10_G10_045.fcs	HEK293_PAClight2_G10_G10_045.fcs	PAClight2	P38	10	8978.4
HEK293_PAClight2_G10_G10_045.fcs	HEK293_PAClight2_G10_G10_045.fcs	PAClight2	P38	10	613.44
HEK293_PAClight2_G10_G10_045.fcs	HEK293_PAClight2_G10_G10_045.fcs	PAClight2	P38	10	10529.3
HEK293_PAClight2_G10_G10_045.fcs	HEK293_PAClight2_G10_G10_045.fcs	PAClight2	P38	10	5860.8
HEK293_PAClight2_G10_G10_045.fcs	HEK293_PAClight2_G10_G10_045.fcs	PAClight2	P38	10	10764
HEK293_PAClight2_G10_G10_045.fcs	HEK293_PAClight2_G10_G10_045.fcs	PAClight2	P38	10	8508.96
HEK293_PAClight2_G10_G10_045.fcs	HEK293_PAClight2_G10_G10_045.fcs	PAClight2	P38	10	6685.92
HEK293_PAClight2_G10_G10_045.fcs	HEK293_PAClight2_G10_G10_045.fcs	PAClight2	P38	10	11723
HEK293_PAClight2_G10_G10_045.fcs	HEK293_PAClight2_G10_G10_045.fcs	PAClight2	P38	10	23328
HEK293_PAClight2_G10_G10_045.fcs	HEK293_PAClight2_G10_G10_045.fcs	PAClight2	P38	10	4413.6
HEK293_PAClight2_G10_G10_045.fcs	HEK293_PAClight2_G10_G10_045.fcs	PAClight2	P38	10	136.8
HEK293_PAClight2_G10_G10_045.fcs	HEK293_PAClight2_G10_G10_045.fcs	PAClight2	P38	10	6039.36
HEK293_PAClight2_G10_G10_045.fcs	HEK293_PAClight2_G10_G10_045.fcs	PAClight2	P38	10	3366.72
HEK293_PAClight2_G10_G10_045.fcs	HEK293_PAClight2_G10_G10_045.fcs	PAClight2	P38	10	18921.6
HEK293_PAClight2_G10_G10_045.fcs	HEK293_PAClight2_G10_G10_045.fcs	PAClight2	P38	10	3543.84
HEK293_PAClight2_G10_G10_045.fcs	HEK293_PAClight2_G10_G10_045.fcs	PAClight2	P38	10	6694.56
HEK293_PAClight2_G10_G10_045.fcs	HEK293_PAClight2_G10_G10_045.fcs	PAClight2	P38	10	13014.7
HEK293_PAClight2_G10_G10_045.fcs	HEK293_PAClight2_G10_G10_045.fcs	PAClight2	P38	10	9197.28
HEK293_PAClight2_G10_G10_045.fcs	HEK293_PAClight2_G10_G10_045.fcs	PAClight2	P38	10	18534.2
HEK293_PAClight2_G10_G10_045.fcs	HEK293_PAClight2_G10_G10_045.fcs	PAClight2	P38	10	9758.88
HEK293_PAClight2_G10_G10_045.fcs	HEK293_PAClight2_G10_G10_045.fcs	PAClight2	P38	10	6069.6
HEK293_PAClight2_G10_G10_045.fcs	HEK293_PAClight2_G10_G10_045.fcs	PAClight2	P38	10	7214.4
HEK293_PAClight2_G10_G10_045.fcs	HEK293_PAClight2_G10_G10_045.fcs	PAClight2	P38	10	15261.1
HEK293_PAClight2_G10_G10_045.fcs	HEK293_PAClight2_G10_G10_045.fcs	PAClight2	P38	10	123.84
HEK293_PAClight2_G10_G10_045.fcs	HEK293_PAClight2_G10_G10_045.fcs	PAClight2	P38	10	13501.4
HEK293_PAClight2_G10_G10_045.fcs	HEK293_PAClight2_G10_G10_045.fcs	PAClight2	P38	10	4269.6
HEK293_PAClight2_G10_G10_045.fcs	HEK293_PAClight2_G10_G10_045.fcs	PAClight2	P38	10	7452
HEK293_PAClight2_G10_G10_045.fcs	HEK293_PAClight2_G10_G10_045.fcs	PAClight2	P38	10	13734.7
HEK293_PAClight2_G10_G10_045.fcs	HEK293_PAClight2_G10_G10_045.fcs	PAClight2	P38	10	11905.9
HEK293_PAClight2_G10_G10_045.fcs	HEK293_PAClight2_G10_G10_045.fcs	PAClight2	P38	10	7990.56
HEK293_PAClight2_G10_G10_045.fcs	HEK293_PAClight2_G10_G10_045.fcs	PAClight2	P38	10	27591.8
HEK293_PAClight2_G10_G10_045.fcs	HEK293_PAClight2_G10_G10_045.fcs	PAClight2	P38	10	9794.88
HEK293_PAClight2_G10_G10_045.fcs	HEK293_PAClight2_G10_G10_045.fcs	PAClight2	P38	10	10018.1
HEK293_PAClight2_G10_G10_045.fcs	HEK293_PAClight2_G10_G10_045.fcs	PAClight2	P38	10	16312.3
HEK293_PAClight2_G10_G10_045.fcs	HEK293_PAClight2_G10_G10_045.fcs	PAClight2	P38	10	1244.16
HEK293_PAClight2_G10_G10_045.fcs	HEK293_PAClight2_G10_G10_045.fcs	PAClight2	P38	10	9544.32
HEK293_PAClight2_G10_G10_045.fcs	HEK293_PAClight2_G10_G10_045.fcs	PAClight2	P38	10	6603.84
HEK293_PAClight2_G10_G10_045.fcs	HEK293_PAClight2_G10_G10_045.fcs	PAClight2	P38	10	15939.4
HEK293_PAClight2_G10_G10_045.fcs	HEK293_PAClight2_G10_G10_045.fcs	PAClight2	P38	10	7909.92
HEK293_PAClight2_G10_G10_045.fcs	HEK293_PAClight2_G10_G10_045.fcs	PAClight2	P38	10	7836.48
HEK293_PAClight2_G10_G10_045.fcs	HEK293_PAClight2_G10_G10_045.fcs	PAClight2	P38	10	9479.52
HEK293_PAClight2_G10_G10_045.fcs	HEK293_PAClight2_G10_G10_045.fcs	PAClight2	P38	10	8609.76
HEK293_PAClight2_G10_G10_045.fcs	HEK293_PAClight2_G10_G10_045.fcs	PAClight2	P38	10	15007.7
HEK293_PAClight2_G10_G10_045.fcs	HEK293_PAClight2_G10_G10_045.fcs	PAClight2	P38	10	6279.84
HEK293_PAClight2_G10_G10_045.fcs	HEK293_PAClight2_G10_G10_045.fcs	PAClight2	P38	10	20629.4
HEK293_PAClight2_G10_G10_045.fcs	HEK293_PAClight2_G10_G10_045.fcs	PAClight2	P38	10	9764.64
HEK293_PAClight2_G10_G10_045.fcs	HEK293_PAClight2_G10_G10_045.fcs	PAClight2	P38	10	7490.88
HEK293_PAClight2_G10_G10_045.fcs	HEK293_PAClight2_G10_G10_045.fcs	PAClight2	P38	10	116.64
HEK293_PAClight2_G10_G10_045.fcs	HEK293_PAClight2_G10_G10_045.fcs	PAClight2	P38	10	10752.5
HEK293_PAClight2_G10_G10_045.fcs	HEK293_PAClight2_G10_G10_045.fcs	PAClight2	P38	10	14778.7
HEK293_PAClight2_G10_G10_045.fcs	HEK293_PAClight2_G10_G10_045.fcs	PAClight2	P38	10	2743.2
HEK293_PAClight2_G10_G10_045.fcs	HEK293_PAClight2_G10_G10_045.fcs	PAClight2	P38	10	7482.24
HEK293_PAClight2_G10_G10_045.fcs	HEK293_PAClight2_G10_G10_045.fcs	PAClight2	P38	10	8383.68
HEK293_PAClight2_G10_G10_045.fcs	HEK293_PAClight2_G10_G10_045.fcs	PAClight2	P38	10	23454.7
HEK293_PAClight2_G10_G10_045.fcs	HEK293_PAClight2_G10_G10_045.fcs	PAClight2	P38	10	7666.56
HEK293_PAClight2_G10_G10_045.fcs	HEK293_PAClight2_G10_G10_045.fcs	PAClight2	P38	10	10693.4
HEK293_PAClight2_G10_G10_045.fcs	HEK293_PAClight2_G10_G10_045.fcs	PAClight2	P38	10	1035.36
HEK293_PAClight2_G10_G10_045.fcs	HEK293_PAClight2_G10_G10_045.fcs	PAClight2	P38	10	7272
HEK293_PAClight2_G10_G10_045.fcs	HEK293_PAClight2_G10_G10_045.fcs	PAClight2	P38	10	17876.2
HEK293_PAClight2_G10_G10_045.fcs	HEK293_PAClight2_G10_G10_045.fcs	PAClight2	P38	10	12843.4
HEK293_PAClight2_G10_G10_045.fcs	HEK293_PAClight2_G10_G10_045.fcs	PAClight2	P38	10	12492
HEK293_PAClight2_G10_G10_045.fcs	HEK293_PAClight2_G10_G10_045.fcs	PAClight2	P38	10	11848.3
HEK293_PAClight2_G10_G10_045.fcs	HEK293_PAClight2_G10_G10_045.fcs	PAClight2	P38	10	29792.2
HEK293_PAClight2_G10_G10_045.fcs	HEK293_PAClight2_G10_G10_045.fcs	PAClight2	P38	10	7875.36
HEK293_PAClight2_G10_G10_045.fcs	HEK293_PAClight2_G10_G10_045.fcs	PAClight2	P38	10	8231.04
HEK293_PAClight2_G10_G10_045.fcs	HEK293_PAClight2_G10_G10_045.fcs	PAClight2	P38	10	7885.44
HEK293_PAClight2_G10_G10_045.fcs	HEK293_PAClight2_G10_G10_045.fcs	PAClight2	P38	10	4014.72
HEK293_PAClight2_G10_G10_045.fcs	HEK293_PAClight2_G10_G10_045.fcs	PAClight2	P38	10	5490.72
HEK293_PAClight2_G10_G10_045.fcs	HEK293_PAClight2_G10_G10_045.fcs	PAClight2	P38	10	9059.04
HEK293_PAClight2_G10_G10_045.fcs	HEK293_PAClight2_G10_G10_045.fcs	PAClight2	P38	10	5071.68
HEK293_PAClight2_G10_G10_045.fcs	HEK293_PAClight2_G10_G10_045.fcs	PAClight2	P38	10	10457.3
HEK293_PAClight2_G10_G10_045.fcs	HEK293_PAClight2_G10_G10_045.fcs	PAClight2	P38	10	9580.32
HEK293_PAClight2_G10_G10_045.fcs	HEK293_PAClight2_G10_G10_045.fcs	PAClight2	P38	10	14328
HEK293_PAClight2_G10_G10_045.fcs	HEK293_PAClight2_G10_G10_045.fcs	PAClight2	P38	10	231.84
HEK293_PAClight2_G10_G10_045.fcs	HEK293_PAClight2_G10_G10_045.fcs	PAClight2	P38	10	5006.88
HEK293_PAClight2_G10_G10_045.fcs	HEK293_PAClight2_G10_G10_045.fcs	PAClight2	P38	10	11453.8
HEK293_PAClight2_G10_G10_045.fcs	HEK293_PAClight2_G10_G10_045.fcs	PAClight2	P38	10	11085.1
HEK293_PAClight2_G10_G10_045.fcs	HEK293_PAClight2_G10_G10_045.fcs	PAClight2	P38	10	4812.48
HEK293_PAClight2_G10_G10_045.fcs	HEK293_PAClight2_G10_G10_045.fcs	PAClight2	P38	10	13952.2
HEK293_PAClight2_G10_G10_045.fcs	HEK293_PAClight2_G10_G10_045.fcs	PAClight2	P38	10	11819.5
HEK293_PAClight2_G10_G10_045.fcs	HEK293_PAClight2_G10_G10_045.fcs	PAClight2	P38	10	7012.8
HEK293_PAClight2_G10_G10_045.fcs	HEK293_PAClight2_G10_G10_045.fcs	PAClight2	P38	10	7686.72
HEK293_PAClight2_G10_G10_045.fcs	HEK293_PAClight2_G10_G10_045.fcs	PAClight2	P38	10	14796
HEK293_PAClight2_G10_G10_045.fcs	HEK293_PAClight2_G10_G10_045.fcs	PAClight2	P38	10	9154.08
HEK293_PAClight2_G10_G10_045.fcs	HEK293_PAClight2_G10_G10_045.fcs	PAClight2	P38	10	11072.2
HEK293_PAClight2_G10_G10_045.fcs	HEK293_PAClight2_G10_G10_045.fcs	PAClight2	P38	10	39971.5
HEK293_PAClight2_G10_G10_045.fcs	HEK293_PAClight2_G10_G10_045.fcs	PAClight2	P38	10	10336.3
HEK293_PAClight2_G10_G10_045.fcs	HEK293_PAClight2_G10_G10_045.fcs	PAClight2	P38	10	8228.16
HEK293_PAClight2_G10_G10_045.fcs	HEK293_PAClight2_G10_G10_045.fcs	PAClight2	P38	10	118783
HEK293_PAClight2_G10_G10_045.fcs	HEK293_PAClight2_G10_G10_045.fcs	PAClight2	P38	10	5123.52
HEK293_PAClight2_G10_G10_045.fcs	HEK293_PAClight2_G10_G10_045.fcs	PAClight2	P38	10	4806.72
HEK293_PAClight2_G10_G10_045.fcs	HEK293_PAClight2_G10_G10_045.fcs	PAClight2	P38	10	25722.7
HEK293_PAClight2_G10_G10_045.fcs	HEK293_PAClight2_G10_G10_045.fcs	PAClight2	P38	10	9532.8
HEK293_PAClight2_G10_G10_045.fcs	HEK293_PAClight2_G10_G10_045.fcs	PAClight2	P38	10	7273.44
HEK293_PAClight2_G10_G10_045.fcs	HEK293_PAClight2_G10_G10_045.fcs	PAClight2	P38	10	4551.84
HEK293_PAClight2_G10_G10_045.fcs	HEK293_PAClight2_G10_G10_045.fcs	PAClight2	P38	10	8447.04
HEK293_PAClight2_G10_G10_045.fcs	HEK293_PAClight2_G10_G10_045.fcs	PAClight2	P38	10	4476.96
HEK293_PAClight2_G10_G10_045.fcs	HEK293_PAClight2_G10_G10_045.fcs	PAClight2	P38	10	6472.8
HEK293_PAClight2_G10_G10_045.fcs	HEK293_PAClight2_G10_G10_045.fcs	PAClight2	P38	10	6295.68
HEK293_PAClight2_G10_G10_045.fcs	HEK293_PAClight2_G10_G10_045.fcs	PAClight2	P38	10	1779.84
HEK293_PAClight2_G10_G10_045.fcs	HEK293_PAClight2_G10_G10_045.fcs	PAClight2	P38	10	6338.88
HEK293_PAClight2_G10_G10_045.fcs	HEK293_PAClight2_G10_G10_045.fcs	PAClight2	P38	10	8681.76
HEK293_PAClight2_G10_G10_045.fcs	HEK293_PAClight2_G10_G10_045.fcs	PAClight2	P38	10	11862.7
HEK293_PAClight2_G10_G10_045.fcs	HEK293_PAClight2_G10_G10_045.fcs	PAClight2	P38	10	23631.8
HEK293_PAClight2_G10_G10_045.fcs	HEK293_PAClight2_G10_G10_045.fcs	PAClight2	P38	10	16973.3
HEK293_PAClight2_G10_G10_045.fcs	HEK293_PAClight2_G10_G10_045.fcs	PAClight2	P38	10	16832.2
HEK293_PAClight2_G10_G10_045.fcs	HEK293_PAClight2_G10_G10_045.fcs	PAClight2	P38	10	4461.12
HEK293_PAClight2_G10_G10_045.fcs	HEK293_PAClight2_G10_G10_045.fcs	PAClight2	P38	10	14307.8
HEK293_PAClight2_G10_G10_045.fcs	HEK293_PAClight2_G10_G10_045.fcs	PAClight2	P38	10	17956.8
HEK293_PAClight2_G10_G10_045.fcs	HEK293_PAClight2_G10_G10_045.fcs	PAClight2	P38	10	5258.88
HEK293_PAClight2_G10_G10_045.fcs	HEK293_PAClight2_G10_G10_045.fcs	PAClight2	P38	10	21877.9
HEK293_PAClight2_G10_G10_045.fcs	HEK293_PAClight2_G10_G10_045.fcs	PAClight2	P38	10	5984.64
HEK293_PAClight2_G10_G10_045.fcs	HEK293_PAClight2_G10_G10_045.fcs	PAClight2	P38	10	3981.6
HEK293_PAClight2_G10_G10_045.fcs	HEK293_PAClight2_G10_G10_045.fcs	PAClight2	P38	10	10522.1
HEK293_PAClight2_G10_G10_045.fcs	HEK293_PAClight2_G10_G10_045.fcs	PAClight2	P38	10	6697.44
HEK293_PAClight2_G10_G10_045.fcs	HEK293_PAClight2_G10_G10_045.fcs	PAClight2	P38	10	5143.68
HEK293_PAClight2_G10_G10_045.fcs	HEK293_PAClight2_G10_G10_045.fcs	PAClight2	P38	10	12637.4
HEK293_PAClight2_G10_G10_045.fcs	HEK293_PAClight2_G10_G10_045.fcs	PAClight2	P38	10	17180.6
HEK293_PAClight2_G10_G10_045.fcs	HEK293_PAClight2_G10_G10_045.fcs	PAClight2	P38	10	10513.4
HEK293_PAClight2_G10_G10_045.fcs	HEK293_PAClight2_G10_G10_045.fcs	PAClight2	P38	10	4037.76
HEK293_PAClight2_G10_G10_045.fcs	HEK293_PAClight2_G10_G10_045.fcs	PAClight2	P38	10	6281.28
HEK293_PAClight2_G10_G10_045.fcs	HEK293_PAClight2_G10_G10_045.fcs	PAClight2	P38	10	10468.8
HEK293_PAClight2_G10_G10_045.fcs	HEK293_PAClight2_G10_G10_045.fcs	PAClight2	P38	10	14492.2
HEK293_PAClight2_G10_G10_045.fcs	HEK293_PAClight2_G10_G10_045.fcs	PAClight2	P38	10	15537.6
HEK293_PAClight2_G10_G10_045.fcs	HEK293_PAClight2_G10_G10_045.fcs	PAClight2	P38	10	3288.96
HEK293_PAClight2_G10_G10_045.fcs	HEK293_PAClight2_G10_G10_045.fcs	PAClight2	P38	10	3903.84
HEK293_PAClight2_G10_G10_045.fcs	HEK293_PAClight2_G10_G10_045.fcs	PAClight2	P38	10	8642.88
HEK293_PAClight2_G10_G10_045.fcs	HEK293_PAClight2_G10_G10_045.fcs	PAClight2	P38	10	5983.2
HEK293_PAClight2_G10_G10_045.fcs	HEK293_PAClight2_G10_G10_045.fcs	PAClight2	P38	10	10522.1
HEK293_PAClight2_G10_G10_045.fcs	HEK293_PAClight2_G10_G10_045.fcs	PAClight2	P38	10	16518.2
HEK293_PAClight2_G10_G10_045.fcs	HEK293_PAClight2_G10_G10_045.fcs	PAClight2	P38	10	12847.7
HEK293_PAClight2_G10_G10_045.fcs	HEK293_PAClight2_G10_G10_045.fcs	PAClight2	P38	10	15565
HEK293_PAClight2_G10_G10_045.fcs	HEK293_PAClight2_G10_G10_045.fcs	PAClight2	P38	10	10137.6
HEK293_PAClight2_G10_G10_045.fcs	HEK293_PAClight2_G10_G10_045.fcs	PAClight2	P38	10	16188.5
HEK293_PAClight2_G10_G10_045.fcs	HEK293_PAClight2_G10_G10_045.fcs	PAClight2	P38	10	9040.32
HEK293_PAClight2_G10_G10_045.fcs	HEK293_PAClight2_G10_G10_045.fcs	PAClight2	P38	10	3517.92
HEK293_PAClight2_G10_G10_045.fcs	HEK293_PAClight2_G10_G10_045.fcs	PAClight2	P38	10	4868.64
HEK293_PAClight2_G10_G10_045.fcs	HEK293_PAClight2_G10_G10_045.fcs	PAClight2	P38	10	354.24
HEK293_PAClight2_G10_G10_045.fcs	HEK293_PAClight2_G10_G10_045.fcs	PAClight2	P38	10	36149.8
HEK293_PAClight2_G10_G10_045.fcs	HEK293_PAClight2_G10_G10_045.fcs	PAClight2	P38	10	22307
HEK293_PAClight2_G10_G10_045.fcs	HEK293_PAClight2_G10_G10_045.fcs	PAClight2	P38	10	7562.88
HEK293_PAClight2_G10_G10_045.fcs	HEK293_PAClight2_G10_G10_045.fcs	PAClight2	P38	10	8504.64
HEK293_PAClight2_G10_G10_045.fcs	HEK293_PAClight2_G10_G10_045.fcs	PAClight2	P38	10	10091.5
HEK293_PAClight2_G10_G10_045.fcs	HEK293_PAClight2_G10_G10_045.fcs	PAClight2	P38	10	19190.9
HEK293_PAClight2_G10_G10_045.fcs	HEK293_PAClight2_G10_G10_045.fcs	PAClight2	P38	10	10562.4
HEK293_PAClight2_G10_G10_045.fcs	HEK293_PAClight2_G10_G10_045.fcs	PAClight2	P38	10	7513.92
HEK293_PAClight2_G10_G10_045.fcs	HEK293_PAClight2_G10_G10_045.fcs	PAClight2	P38	10	8916.48
HEK293_PAClight2_G10_G10_045.fcs	HEK293_PAClight2_G10_G10_045.fcs	PAClight2	P38	10	6181.92
HEK293_PAClight2_G10_G10_045.fcs	HEK293_PAClight2_G10_G10_045.fcs	PAClight2	P38	10	30373.9
HEK293_PAClight2_G10_G10_045.fcs	HEK293_PAClight2_G10_G10_045.fcs	PAClight2	P38	10	10332
HEK293_PAClight2_G10_G10_045.fcs	HEK293_PAClight2_G10_G10_045.fcs	PAClight2	P38	10	180
HEK293_PAClight2_G10_G10_045.fcs	HEK293_PAClight2_G10_G10_045.fcs	PAClight2	P38	10	5173.92
HEK293_PAClight2_G10_G10_045.fcs	HEK293_PAClight2_G10_G10_045.fcs	PAClight2	P38	10	1954.08
HEK293_PAClight2_G10_G10_045.fcs	HEK293_PAClight2_G10_G10_045.fcs	PAClight2	P38	10	10944
HEK293_PAClight2_G10_G10_045.fcs	HEK293_PAClight2_G10_G10_045.fcs	PAClight2	P38	10	10435.7
HEK293_PAClight2_G10_G10_045.fcs	HEK293_PAClight2_G10_G10_045.fcs	PAClight2	P38	10	3879.36
HEK293_PAClight2_G10_G10_045.fcs	HEK293_PAClight2_G10_G10_045.fcs	PAClight2	P38	10	6949.44
HEK293_PAClight2_G10_G10_045.fcs	HEK293_PAClight2_G10_G10_045.fcs	PAClight2	P38	10	-61.92
HEK293_PAClight2_G10_G10_045.fcs	HEK293_PAClight2_G10_G10_045.fcs	PAClight2	P38	10	5189.76
HEK293_PAClight2_G10_G10_045.fcs	HEK293_PAClight2_G10_G10_045.fcs	PAClight2	P38	10	4538.88
HEK293_PAClight2_G10_G10_045.fcs	HEK293_PAClight2_G10_G10_045.fcs	PAClight2	P38	10	3542.4
HEK293_PAClight2_G10_G10_045.fcs	HEK293_PAClight2_G10_G10_045.fcs	PAClight2	P38	10	7469.28
HEK293_PAClight2_G10_G10_045.fcs	HEK293_PAClight2_G10_G10_045.fcs	PAClight2	P38	10	33855.8
HEK293_PAClight2_G10_G10_045.fcs	HEK293_PAClight2_G10_G10_045.fcs	PAClight2	P38	10	432
HEK293_PAClight2_G10_G10_045.fcs	HEK293_PAClight2_G10_G10_045.fcs	PAClight2	P38	10	8684.64
HEK293_PAClight2_G10_G10_045.fcs	HEK293_PAClight2_G10_G10_045.fcs	PAClight2	P38	10	10833.1
HEK293_PAClight2_G10_G10_045.fcs	HEK293_PAClight2_G10_G10_045.fcs	PAClight2	P38	10	7863.84
HEK293_PAClight2_G10_G10_045.fcs	HEK293_PAClight2_G10_G10_045.fcs	PAClight2	P38	10	4230.72
HEK293_PAClight2_G10_G10_045.fcs	HEK293_PAClight2_G10_G10_045.fcs	PAClight2	P38	10	19921
HEK293_PAClight2_G10_G10_045.fcs	HEK293_PAClight2_G10_G10_045.fcs	PAClight2	P38	10	11017.4
HEK293_PAClight2_G10_G10_045.fcs	HEK293_PAClight2_G10_G10_045.fcs	PAClight2	P38	10	2338.56
HEK293_PAClight2_G10_G10_045.fcs	HEK293_PAClight2_G10_G10_045.fcs	PAClight2	P38	10	17995.7
HEK293_PAClight2_G10_G10_045.fcs	HEK293_PAClight2_G10_G10_045.fcs	PAClight2	P38	10	14237.3
HEK293_PAClight2_G10_G10_045.fcs	HEK293_PAClight2_G10_G10_045.fcs	PAClight2	P38	10	6996.96
HEK293_PAClight2_G10_G10_045.fcs	HEK293_PAClight2_G10_G10_045.fcs	PAClight2	P38	10	1530.72
HEK293_PAClight2_G10_G10_045.fcs	HEK293_PAClight2_G10_G10_045.fcs	PAClight2	P38	10	13765
HEK293_PAClight2_G10_G10_045.fcs	HEK293_PAClight2_G10_G10_045.fcs	PAClight2	P38	10	9730.08
HEK293_PAClight2_G10_G10_045.fcs	HEK293_PAClight2_G10_G10_045.fcs	PAClight2	P38	10	5496.48
HEK293_PAClight2_G10_G10_045.fcs	HEK293_PAClight2_G10_G10_045.fcs	PAClight2	P38	10	9109.44
HEK293_PAClight2_G10_G10_045.fcs	HEK293_PAClight2_G10_G10_045.fcs	PAClight2	P38	10	11128.3
HEK293_PAClight2_G10_G10_045.fcs	HEK293_PAClight2_G10_G10_045.fcs	PAClight2	P38	10	15616.8
HEK293_PAClight2_G10_G10_045.fcs	HEK293_PAClight2_G10_G10_045.fcs	PAClight2	P38	10	22177.4
HEK293_PAClight2_G10_G10_045.fcs	HEK293_PAClight2_G10_G10_045.fcs	PAClight2	P38	10	4957.92
HEK293_PAClight2_G10_G10_045.fcs	HEK293_PAClight2_G10_G10_045.fcs	PAClight2	P38	10	6301.44
HEK293_PAClight2_G10_G10_045.fcs	HEK293_PAClight2_G10_G10_045.fcs	PAClight2	P38	10	7902.72
HEK293_PAClight2_G10_G10_045.fcs	HEK293_PAClight2_G10_G10_045.fcs	PAClight2	P38	10	4599.36
HEK293_PAClight2_G10_G10_045.fcs	HEK293_PAClight2_G10_G10_045.fcs	PAClight2	P38	10	14431.7
HEK293_PAClight2_G10_G10_045.fcs	HEK293_PAClight2_G10_G10_045.fcs	PAClight2	P38	10	4351.68
HEK293_PAClight2_G10_G10_045.fcs	HEK293_PAClight2_G10_G10_045.fcs	PAClight2	P38	10	8817.12
HEK293_PAClight2_G10_G10_045.fcs	HEK293_PAClight2_G10_G10_045.fcs	PAClight2	P38	10	33936.5
HEK293_PAClight2_G10_G10_045.fcs	HEK293_PAClight2_G10_G10_045.fcs	PAClight2	P38	10	8496
HEK293_PAClight2_G10_G10_045.fcs	HEK293_PAClight2_G10_G10_045.fcs	PAClight2	P38	10	40657
HEK293_PAClight2_G10_G10_045.fcs	HEK293_PAClight2_G10_G10_045.fcs	PAClight2	P38	10	7702.56
HEK293_PAClight2_G10_G10_045.fcs	HEK293_PAClight2_G10_G10_045.fcs	PAClight2	P38	10	5199.84
HEK293_PAClight2_G10_G10_045.fcs	HEK293_PAClight2_G10_G10_045.fcs	PAClight2	P38	10	10563.8
HEK293_PAClight2_G10_G10_045.fcs	HEK293_PAClight2_G10_G10_045.fcs	PAClight2	P38	10	19330.6
HEK293_PAClight2_G10_G10_045.fcs	HEK293_PAClight2_G10_G10_045.fcs	PAClight2	P38	10	12903.8
HEK293_PAClight2_G10_G10_045.fcs	HEK293_PAClight2_G10_G10_045.fcs	PAClight2	P38	10	35879
HEK293_PAClight2_G10_G10_045.fcs	HEK293_PAClight2_G10_G10_045.fcs	PAClight2	P38	10	11427.8
HEK293_PAClight2_G10_G10_045.fcs	HEK293_PAClight2_G10_G10_045.fcs	PAClight2	P38	10	1386.72
HEK293_PAClight2_G10_G10_045.fcs	HEK293_PAClight2_G10_G10_045.fcs	PAClight2	P38	10	12564
HEK293_PAClight2_G10_G10_045.fcs	HEK293_PAClight2_G10_G10_045.fcs	PAClight2	P38	10	7060.32
HEK293_PAClight2_G10_G10_045.fcs	HEK293_PAClight2_G10_G10_045.fcs	PAClight2	P38	10	24795.4
HEK293_PAClight2_G10_G10_045.fcs	HEK293_PAClight2_G10_G10_045.fcs	PAClight2	P38	10	17524.8
HEK293_PAClight2_G10_G10_045.fcs	HEK293_PAClight2_G10_G10_045.fcs	PAClight2	P38	10	16051.7
HEK293_PAClight2_G10_G10_045.fcs	HEK293_PAClight2_G10_G10_045.fcs	PAClight2	P38	10	15278.4
HEK293_PAClight2_G10_G10_045.fcs	HEK293_PAClight2_G10_G10_045.fcs	PAClight2	P38	10	12500.6
HEK293_PAClight2_G10_G10_045.fcs	HEK293_PAClight2_G10_G10_045.fcs	PAClight2	P38	10	757.44
HEK293_PAClight2_G10_G10_045.fcs	HEK293_PAClight2_G10_G10_045.fcs	PAClight2	P38	10	20455.2
HEK293_PAClight2_G10_G10_045.fcs	HEK293_PAClight2_G10_G10_045.fcs	PAClight2	P38	10	27361.4
HEK293_PAClight2_G10_G10_045.fcs	HEK293_PAClight2_G10_G10_045.fcs	PAClight2	P38	10	1265.76
HEK293_PAClight2_G10_G10_045.fcs	HEK293_PAClight2_G10_G10_045.fcs	PAClight2	P38	10	3294.72
HEK293_PAClight2_G10_G10_045.fcs	HEK293_PAClight2_G10_G10_045.fcs	PAClight2	P38	10	8909.28
HEK293_PAClight2_G10_G10_045.fcs	HEK293_PAClight2_G10_G10_045.fcs	PAClight2	P38	10	6230.88
HEK293_PAClight2_G10_G10_045.fcs	HEK293_PAClight2_G10_G10_045.fcs	PAClight2	P38	10	19463
HEK293_PAClight2_G10_G10_045.fcs	HEK293_PAClight2_G10_G10_045.fcs	PAClight2	P38	10	8818.56
HEK293_PAClight2_G10_G10_045.fcs	HEK293_PAClight2_G10_G10_045.fcs	PAClight2	P38	10	22307
HEK293_PAClight2_G10_G10_045.fcs	HEK293_PAClight2_G10_G10_045.fcs	PAClight2	P38	10	1522.08
HEK293_PAClight2_G10_G10_045.fcs	HEK293_PAClight2_G10_G10_045.fcs	PAClight2	P38	10	29973.6
HEK293_PAClight2_G10_G10_045.fcs	HEK293_PAClight2_G10_G10_045.fcs	PAClight2	P38	10	7860.96
HEK293_PAClight2_G10_G10_045.fcs	HEK293_PAClight2_G10_G10_045.fcs	PAClight2	P38	10	5018.4
HEK293_PAClight2_G10_G10_045.fcs	HEK293_PAClight2_G10_G10_045.fcs	PAClight2	P38	10	11982.2
HEK293_PAClight2_G10_G10_045.fcs	HEK293_PAClight2_G10_G10_045.fcs	PAClight2	P38	10	6721.92
HEK293_PAClight2_G10_G10_045.fcs	HEK293_PAClight2_G10_G10_045.fcs	PAClight2	P38	10	6258.24
HEK293_PAClight2_G10_G10_045.fcs	HEK293_PAClight2_G10_G10_045.fcs	PAClight2	P38	10	13134.2
HEK293_PAClight2_G10_G10_045.fcs	HEK293_PAClight2_G10_G10_045.fcs	PAClight2	P38	10	7032.96
HEK293_PAClight2_G10_G10_045.fcs	HEK293_PAClight2_G10_G10_045.fcs	PAClight2	P38	10	10127.5
HEK293_PAClight2_G10_G10_045.fcs	HEK293_PAClight2_G10_G10_045.fcs	PAClight2	P38	10	7272
HEK293_PAClight2_G10_G10_045.fcs	HEK293_PAClight2_G10_G10_045.fcs	PAClight2	P38	10	6297.12
HEK293_PAClight2_G10_G10_045.fcs	HEK293_PAClight2_G10_G10_045.fcs	PAClight2	P38	10	10143.4
HEK293_PAClight2_G10_G10_045.fcs	HEK293_PAClight2_G10_G10_045.fcs	PAClight2	P38	10	4924.8
HEK293_PAClight2_G10_G10_045.fcs	HEK293_PAClight2_G10_G10_045.fcs	PAClight2	P38	10	3146.4
HEK293_PAClight2_G10_G10_045.fcs	HEK293_PAClight2_G10_G10_045.fcs	PAClight2	P38	10	14497.9
HEK293_PAClight2_G10_G10_045.fcs	HEK293_PAClight2_G10_G10_045.fcs	PAClight2	P38	10	11463.8
HEK293_PAClight2_G10_G10_045.fcs	HEK293_PAClight2_G10_G10_045.fcs	PAClight2	P38	10	14104.8
HEK293_PAClight2_G10_G10_045.fcs	HEK293_PAClight2_G10_G10_045.fcs	PAClight2	P38	10	4517.28
HEK293_PAClight2_G10_G10_045.fcs	HEK293_PAClight2_G10_G10_045.fcs	PAClight2	P38	10	13730.4
HEK293_PAClight2_G10_G10_045.fcs	HEK293_PAClight2_G10_G10_045.fcs	PAClight2	P38	10	11281
HEK293_PAClight2_G10_G10_045.fcs	HEK293_PAClight2_G10_G10_045.fcs	PAClight2	P38	10	8006.4
HEK293_PAClight2_G10_G10_045.fcs	HEK293_PAClight2_G10_G10_045.fcs	PAClight2	P38	10	21994.6
HEK293_PAClight2_G10_G10_045.fcs	HEK293_PAClight2_G10_G10_045.fcs	PAClight2	P38	10	11113.9
HEK293_PAClight2_G10_G10_045.fcs	HEK293_PAClight2_G10_G10_045.fcs	PAClight2	P38	10	5850.72
HEK293_PAClight2_G10_G10_045.fcs	HEK293_PAClight2_G10_G10_045.fcs	PAClight2	P38	10	15811.2
HEK293_PAClight2_G10_G10_045.fcs	HEK293_PAClight2_G10_G10_045.fcs	PAClight2	P38	10	11623.7
HEK293_PAClight2_G10_G10_045.fcs	HEK293_PAClight2_G10_G10_045.fcs	PAClight2	P38	10	9545.76
HEK293_PAClight2_G10_G10_045.fcs	HEK293_PAClight2_G10_G10_045.fcs	PAClight2	P38	10	5961.6
HEK293_PAClight2_G10_G10_045.fcs	HEK293_PAClight2_G10_G10_045.fcs	PAClight2	P38	10	14595.8
HEK293_PAClight2_G10_G10_045.fcs	HEK293_PAClight2_G10_G10_045.fcs	PAClight2	P38	10	10705
HEK293_PAClight2_G10_G10_045.fcs	HEK293_PAClight2_G10_G10_045.fcs	PAClight2	P38	10	12520.8
HEK293_PAClight2_G10_G10_045.fcs	HEK293_PAClight2_G10_G10_045.fcs	PAClight2	P38	10	16237.4
HEK293_PAClight2_G10_G10_045.fcs	HEK293_PAClight2_G10_G10_045.fcs	PAClight2	P38	10	4586.4
HEK293_PAClight2_G10_G10_045.fcs	HEK293_PAClight2_G10_G10_045.fcs	PAClight2	P38	10	8487.36
HEK293_PAClight2_G10_G10_045.fcs	HEK293_PAClight2_G10_G10_045.fcs	PAClight2	P38	10	9897.12
HEK293_PAClight2_G10_G10_045.fcs	HEK293_PAClight2_G10_G10_045.fcs	PAClight2	P38	10	5440.32
HEK293_PAClight2_G10_G10_045.fcs	HEK293_PAClight2_G10_G10_045.fcs	PAClight2	P38	10	4167.36
HEK293_PAClight2_G10_G10_045.fcs	HEK293_PAClight2_G10_G10_045.fcs	PAClight2	P38	10	7705.44
HEK293_PAClight2_G10_G10_045.fcs	HEK293_PAClight2_G10_G10_045.fcs	PAClight2	P38	10	7617.6
HEK293_PAClight2_G10_G10_045.fcs	HEK293_PAClight2_G10_G10_045.fcs	PAClight2	P38	10	10823
HEK293_PAClight2_G10_G10_045.fcs	HEK293_PAClight2_G10_G10_045.fcs	PAClight2	P38	10	8739.36
HEK293_PAClight2_G10_G10_045.fcs	HEK293_PAClight2_G10_G10_045.fcs	PAClight2	P38	10	8180.64
HEK293_PAClight2_G10_G10_045.fcs	HEK293_PAClight2_G10_G10_045.fcs	PAClight2	P38	10	11574.7
HEK293_PAClight2_G10_G10_045.fcs	HEK293_PAClight2_G10_G10_045.fcs	PAClight2	P38	10	7466.4
HEK293_PAClight2_G10_G10_045.fcs	HEK293_PAClight2_G10_G10_045.fcs	PAClight2	P38	10	9541.44
HEK293_PAClight2_G10_G10_045.fcs	HEK293_PAClight2_G10_G10_045.fcs	PAClight2	P38	10	6323.04
HEK293_PAClight2_G10_G10_045.fcs	HEK293_PAClight2_G10_G10_045.fcs	PAClight2	P38	10	-96.48
HEK293_PAClight2_G10_G10_045.fcs	HEK293_PAClight2_G10_G10_045.fcs	PAClight2	P38	10	1830.24
HEK293_PAClight2_G10_G10_045.fcs	HEK293_PAClight2_G10_G10_045.fcs	PAClight2	P38	10	11907.4
HEK293_PAClight2_G10_G10_045.fcs	HEK293_PAClight2_G10_G10_045.fcs	PAClight2	P38	10	8428.32
HEK293_PAClight2_G10_G10_045.fcs	HEK293_PAClight2_G10_G10_045.fcs	PAClight2	P38	10	16822.1
HEK293_PAClight2_G10_G10_045.fcs	HEK293_PAClight2_G10_G10_045.fcs	PAClight2	P38	10	21152.2
HEK293_PAClight2_G10_G10_045.fcs	HEK293_PAClight2_G10_G10_045.fcs	PAClight2	P38	10	9911.52
HEK293_PAClight2_G10_G10_045.fcs	HEK293_PAClight2_G10_G10_045.fcs	PAClight2	P38	10	-174.24
HEK293_PAClight2_G10_G10_045.fcs	HEK293_PAClight2_G10_G10_045.fcs	PAClight2	P38	10	17552.2
HEK293_PAClight2_G10_G10_045.fcs	HEK293_PAClight2_G10_G10_045.fcs	PAClight2	P38	10	10684.8
HEK293_PAClight2_G10_G10_045.fcs	HEK293_PAClight2_G10_G10_045.fcs	PAClight2	P38	10	3604.32
HEK293_PAClight2_G10_G10_045.fcs	HEK293_PAClight2_G10_G10_045.fcs	PAClight2	P38	10	16126.6
HEK293_PAClight2_G10_G10_045.fcs	HEK293_PAClight2_G10_G10_045.fcs	PAClight2	P38	10	9581.76
HEK293_PAClight2_G10_G10_045.fcs	HEK293_PAClight2_G10_G10_045.fcs	PAClight2	P38	10	2489.76
HEK293_PAClight2_G10_G10_045.fcs	HEK293_PAClight2_G10_G10_045.fcs	PAClight2	P38	10	3765.6
HEK293_PAClight2_G10_G10_045.fcs	HEK293_PAClight2_G10_G10_045.fcs	PAClight2	P38	10	30669.1
HEK293_PAClight2_G10_G10_045.fcs	HEK293_PAClight2_G10_G10_045.fcs	PAClight2	P38	10	5811.84
HEK293_PAClight2_G10_G10_045.fcs	HEK293_PAClight2_G10_G10_045.fcs	PAClight2	P38	10	4878.72
HEK293_PAClight2_G10_G10_045.fcs	HEK293_PAClight2_G10_G10_045.fcs	PAClight2	P38	10	7513.92
HEK293_PAClight2_G10_G10_045.fcs	HEK293_PAClight2_G10_G10_045.fcs	PAClight2	P38	10	17320.3
HEK293_PAClight2_G10_G10_045.fcs	HEK293_PAClight2_G10_G10_045.fcs	PAClight2	P38	10	5980.32
HEK293_PAClight2_G10_G10_045.fcs	HEK293_PAClight2_G10_G10_045.fcs	PAClight2	P38	10	3435.84
HEK293_PAClight2_G10_G10_045.fcs	HEK293_PAClight2_G10_G10_045.fcs	PAClight2	P38	10	15855.8
HEK293_PAClight2_G10_G10_045.fcs	HEK293_PAClight2_G10_G10_045.fcs	PAClight2	P38	10	2412
HEK293_PAClight2_G10_G10_045.fcs	HEK293_PAClight2_G10_G10_045.fcs	PAClight2	P38	10	14405.8
HEK293_PAClight2_G10_G10_045.fcs	HEK293_PAClight2_G10_G10_045.fcs	PAClight2	P38	10	14457.6
HEK293_PAClight2_G10_G10_045.fcs	HEK293_PAClight2_G10_G10_045.fcs	PAClight2	P38	10	5765.76
HEK293_PAClight2_G10_G10_045.fcs	HEK293_PAClight2_G10_G10_045.fcs	PAClight2	P38	10	6402.24
HEK293_PAClight2_G10_G10_045.fcs	HEK293_PAClight2_G10_G10_045.fcs	PAClight2	P38	10	2688.48
HEK293_PAClight2_G10_G10_045.fcs	HEK293_PAClight2_G10_G10_045.fcs	PAClight2	P38	10	565.92
HEK293_PAClight2_G10_G10_045.fcs	HEK293_PAClight2_G10_G10_045.fcs	PAClight2	P38	10	33433.9
HEK293_PAClight2_G10_G10_045.fcs	HEK293_PAClight2_G10_G10_045.fcs	PAClight2	P38	10	11242.1
HEK293_PAClight2_G10_G10_045.fcs	HEK293_PAClight2_G10_G10_045.fcs	PAClight2	P38	10	11011.7
HEK293_PAClight2_G10_G10_045.fcs	HEK293_PAClight2_G10_G10_045.fcs	PAClight2	P38	10	10165
HEK293_PAClight2_G10_G10_045.fcs	HEK293_PAClight2_G10_G10_045.fcs	PAClight2	P38	10	3392.64
HEK293_PAClight2_G10_G10_045.fcs	HEK293_PAClight2_G10_G10_045.fcs	PAClight2	P38	10	14101.9
HEK293_PAClight2_G10_G10_045.fcs	HEK293_PAClight2_G10_G10_045.fcs	PAClight2	P38	10	7555.68
HEK293_PAClight2_G10_G10_045.fcs	HEK293_PAClight2_G10_G10_045.fcs	PAClight2	P38	10	9947.52
HEK293_PAClight2_G10_G10_045.fcs	HEK293_PAClight2_G10_G10_045.fcs	PAClight2	P38	10	4525.92
HEK293_PAClight2_G10_G10_045.fcs	HEK293_PAClight2_G10_G10_045.fcs	PAClight2	P38	10	4212
HEK293_PAClight2_G10_G10_045.fcs	HEK293_PAClight2_G10_G10_045.fcs	PAClight2	P38	10	3330.72
HEK293_PAClight2_G10_G10_045.fcs	HEK293_PAClight2_G10_G10_045.fcs	PAClight2	P38	10	8144.64
HEK293_PAClight2_G10_G10_045.fcs	HEK293_PAClight2_G10_G10_045.fcs	PAClight2	P38	10	4881.6
HEK293_PAClight2_G10_G10_045.fcs	HEK293_PAClight2_G10_G10_045.fcs	PAClight2	P38	10	4620.96
HEK293_PAClight2_G10_G10_045.fcs	HEK293_PAClight2_G10_G10_045.fcs	PAClight2	P38	10	10251.4
HEK293_PAClight2_G10_G10_045.fcs	HEK293_PAClight2_G10_G10_045.fcs	PAClight2	P38	10	11593.4
HEK293_PAClight2_G10_G10_045.fcs	HEK293_PAClight2_G10_G10_045.fcs	PAClight2	P38	10	4695.84
HEK293_PAClight2_G10_G10_045.fcs	HEK293_PAClight2_G10_G10_045.fcs	PAClight2	P38	10	4271.04
HEK293_PAClight2_G10_G10_045.fcs	HEK293_PAClight2_G10_G10_045.fcs	PAClight2	P38	10	2931.84
HEK293_PAClight2_G10_G10_045.fcs	HEK293_PAClight2_G10_G10_045.fcs	PAClight2	P38	10	24894.7
HEK293_PAClight2_G10_G10_045.fcs	HEK293_PAClight2_G10_G10_045.fcs	PAClight2	P38	10	3228.48
HEK293_PAClight2_G10_G10_045.fcs	HEK293_PAClight2_G10_G10_045.fcs	PAClight2	P38	10	9380.16
HEK293_PAClight2_G10_G10_045.fcs	HEK293_PAClight2_G10_G10_045.fcs	PAClight2	P38	10	6281.28
HEK293_PAClight2_G10_G10_045.fcs	HEK293_PAClight2_G10_G10_045.fcs	PAClight2	P38	10	6089.76
HEK293_PAClight2_G10_G10_045.fcs	HEK293_PAClight2_G10_G10_045.fcs	PAClight2	P38	10	4933.44
HEK293_PAClight2_G10_G10_045.fcs	HEK293_PAClight2_G10_G10_045.fcs	PAClight2	P38	10	10306.1
HEK293_PAClight2_G10_G10_045.fcs	HEK293_PAClight2_G10_G10_045.fcs	PAClight2	P38	10	3191.04
HEK293_PAClight2_G10_G10_045.fcs	HEK293_PAClight2_G10_G10_045.fcs	PAClight2	P38	10	13417.9
HEK293_PAClight2_G10_G10_045.fcs	HEK293_PAClight2_G10_G10_045.fcs	PAClight2	P38	10	14420.2
HEK293_PAClight2_G10_G10_045.fcs	HEK293_PAClight2_G10_G10_045.fcs	PAClight2	P38	10	5274.72
HEK293_PAClight2_G10_G10_045.fcs	HEK293_PAClight2_G10_G10_045.fcs	PAClight2	P38	10	8089.92
HEK293_PAClight2_G10_G10_045.fcs	HEK293_PAClight2_G10_G10_045.fcs	PAClight2	P38	10	6624
HEK293_PAClight2_G10_G10_045.fcs	HEK293_PAClight2_G10_G10_045.fcs	PAClight2	P38	10	3012.48
HEK293_PAClight2_G10_G10_045.fcs	HEK293_PAClight2_G10_G10_045.fcs	PAClight2	P38	10	8161.92
HEK293_PAClight2_G10_G10_045.fcs	HEK293_PAClight2_G10_G10_045.fcs	PAClight2	P38	10	6252.48
HEK293_PAClight2_G10_G10_045.fcs	HEK293_PAClight2_G10_G10_045.fcs	PAClight2	P38	10	8560.8
HEK293_PAClight2_G10_G10_045.fcs	HEK293_PAClight2_G10_G10_045.fcs	PAClight2	P38	10	8976.96
HEK293_PAClight2_G10_G10_045.fcs	HEK293_PAClight2_G10_G10_045.fcs	PAClight2	P38	10	5232.96
HEK293_PAClight2_G10_G10_045.fcs	HEK293_PAClight2_G10_G10_045.fcs	PAClight2	P38	10	13186.1
HEK293_PAClight2_G10_G10_045.fcs	HEK293_PAClight2_G10_G10_045.fcs	PAClight2	P38	10	70.56
HEK293_PAClight2_G10_G10_045.fcs	HEK293_PAClight2_G10_G10_045.fcs	PAClight2	P38	10	3038.4
HEK293_PAClight2_G10_G10_045.fcs	HEK293_PAClight2_G10_G10_045.fcs	PAClight2	P38	10	4749.12
HEK293_PAClight2_G10_G10_045.fcs	HEK293_PAClight2_G10_G10_045.fcs	PAClight2	P38	10	-41.76
HEK293_PAClight2_G10_G10_045.fcs	HEK293_PAClight2_G10_G10_045.fcs	PAClight2	P38	10	9721.44
HEK293_PAClight2_G10_G10_045.fcs	HEK293_PAClight2_G10_G10_045.fcs	PAClight2	P38	10	4822.56
HEK293_PAClight2_G10_G10_045.fcs	HEK293_PAClight2_G10_G10_045.fcs	PAClight2	P38	10	6769.44
HEK293_PAClight2_G10_G10_045.fcs	HEK293_PAClight2_G10_G10_045.fcs	PAClight2	P38	10	7604.64
HEK293_PAClight2_G10_G10_045.fcs	HEK293_PAClight2_G10_G10_045.fcs	PAClight2	P38	10	17193.6
HEK293_PAClight2_G10_G10_045.fcs	HEK293_PAClight2_G10_G10_045.fcs	PAClight2	P38	10	12781.4
HEK293_PAClight2_G10_G10_045.fcs	HEK293_PAClight2_G10_G10_045.fcs	PAClight2	P38	10	7351.2
HEK293_PAClight2_G10_G10_045.fcs	HEK293_PAClight2_G10_G10_045.fcs	PAClight2	P38	10	-57.6
HEK293_PAClight2_G10_G10_045.fcs	HEK293_PAClight2_G10_G10_045.fcs	PAClight2	P38	10	7865.28
HEK293_PAClight2_G10_G10_045.fcs	HEK293_PAClight2_G10_G10_045.fcs	PAClight2	P38	10	20439.4
HEK293_PAClight2_G10_G10_045.fcs	HEK293_PAClight2_G10_G10_045.fcs	PAClight2	P38	10	-97.92
HEK293_PAClight2_G10_G10_045.fcs	HEK293_PAClight2_G10_G10_045.fcs	PAClight2	P38	10	1087.2
HEK293_PAClight2_G10_G10_045.fcs	HEK293_PAClight2_G10_G10_045.fcs	PAClight2	P38	10	3339.36
HEK293_PAClight2_G10_G10_045.fcs	HEK293_PAClight2_G10_G10_045.fcs	PAClight2	P38	10	12552.5
HEK293_PAClight2_G10_G10_045.fcs	HEK293_PAClight2_G10_G10_045.fcs	PAClight2	P38	10	1704.96
HEK293_PAClight2_G10_G10_045.fcs	HEK293_PAClight2_G10_G10_045.fcs	PAClight2	P38	10	6016.32
HEK293_PAClight2_G10_G10_045.fcs	HEK293_PAClight2_G10_G10_045.fcs	PAClight2	P38	10	17439.8
HEK293_PAClight2_G10_G10_045.fcs	HEK293_PAClight2_G10_G10_045.fcs	PAClight2	P38	10	4736.16
HEK293_PAClight2_G10_G10_045.fcs	HEK293_PAClight2_G10_G10_045.fcs	PAClight2	P38	10	6662.88
HEK293_PAClight2_G10_G10_045.fcs	HEK293_PAClight2_G10_G10_045.fcs	PAClight2	P38	10	2636.64
HEK293_PAClight2_G10_G10_045.fcs	HEK293_PAClight2_G10_G10_045.fcs	PAClight2	P38	10	7884
HEK293_PAClight2_G10_G10_045.fcs	HEK293_PAClight2_G10_G10_045.fcs	PAClight2	P38	10	6085.44
HEK293_PAClight2_G10_G10_045.fcs	HEK293_PAClight2_G10_G10_045.fcs	PAClight2	P38	10	8508.96
HEK293_PAClight2_G10_G10_045.fcs	HEK293_PAClight2_G10_G10_045.fcs	PAClight2	P38	10	7176.96
HEK293_PAClight2_G10_G10_045.fcs	HEK293_PAClight2_G10_G10_045.fcs	PAClight2	P38	10	5535.36
HEK293_PAClight2_G10_G10_045.fcs	HEK293_PAClight2_G10_G10_045.fcs	PAClight2	P38	10	14640.5
HEK293_PAClight2_G10_G10_045.fcs	HEK293_PAClight2_G10_G10_045.fcs	PAClight2	P38	10	8372.16
HEK293_PAClight2_G10_G10_045.fcs	HEK293_PAClight2_G10_G10_045.fcs	PAClight2	P38	10	8801.28
HEK293_PAClight2_G10_G10_045.fcs	HEK293_PAClight2_G10_G10_045.fcs	PAClight2	P38	10	2024.64
HEK293_PAClight2_G10_G10_045.fcs	HEK293_PAClight2_G10_G10_045.fcs	PAClight2	P38	10	11946.2
HEK293_PAClight2_G10_G10_045.fcs	HEK293_PAClight2_G10_G10_045.fcs	PAClight2	P38	10	4412.16
HEK293_PAClight2_G10_G10_045.fcs	HEK293_PAClight2_G10_G10_045.fcs	PAClight2	P38	10	7244.64
HEK293_PAClight2_G10_G10_045.fcs	HEK293_PAClight2_G10_G10_045.fcs	PAClight2	P38	10	8310.24
HEK293_PAClight2_G10_G10_045.fcs	HEK293_PAClight2_G10_G10_045.fcs	PAClight2	P38	10	1445.76
HEK293_PAClight2_G10_G10_045.fcs	HEK293_PAClight2_G10_G10_045.fcs	PAClight2	P38	10	5793.12
HEK293_PAClight2_G10_G10_045.fcs	HEK293_PAClight2_G10_G10_045.fcs	PAClight2	P38	10	10484.6
HEK293_PAClight2_G10_G10_045.fcs	HEK293_PAClight2_G10_G10_045.fcs	PAClight2	P38	10	4752
HEK293_PAClight2_G10_G10_045.fcs	HEK293_PAClight2_G10_G10_045.fcs	PAClight2	P38	10	11118.2
HEK293_PAClight2_G10_G10_045.fcs	HEK293_PAClight2_G10_G10_045.fcs	PAClight2	P38	10	9884.16
HEK293_PAClight2_G10_G10_045.fcs	HEK293_PAClight2_G10_G10_045.fcs	PAClight2	P38	10	2119.68
HEK293_PAClight2_G10_G10_045.fcs	HEK293_PAClight2_G10_G10_045.fcs	PAClight2	P38	10	8828.64
HEK293_PAClight2_G10_G10_045.fcs	HEK293_PAClight2_G10_G10_045.fcs	PAClight2	P38	10	7191.36
HEK293_PAClight2_G10_G10_045.fcs	HEK293_PAClight2_G10_G10_045.fcs	PAClight2	P38	10	12546.7
HEK293_PAClight2_G10_G10_045.fcs	HEK293_PAClight2_G10_G10_045.fcs	PAClight2	P38	10	5680.8
HEK293_PAClight2_G10_G10_045.fcs	HEK293_PAClight2_G10_G10_045.fcs	PAClight2	P38	10	5270.4
HEK293_PAClight2_G10_G10_045.fcs	HEK293_PAClight2_G10_G10_045.fcs	PAClight2	P38	10	7145.28
HEK293_PAClight2_G10_G10_045.fcs	HEK293_PAClight2_G10_G10_045.fcs	PAClight2	P38	10	3974.4
HEK293_PAClight2_G10_G10_045.fcs	HEK293_PAClight2_G10_G10_045.fcs	PAClight2	P38	10	10523.5
HEK293_PAClight2_G10_G10_045.fcs	HEK293_PAClight2_G10_G10_045.fcs	PAClight2	P38	10	5515.2
HEK293_PAClight2_G10_G10_045.fcs	HEK293_PAClight2_G10_G10_045.fcs	PAClight2	P38	10	6075.36
HEK293_PAClight2_G10_G10_045.fcs	HEK293_PAClight2_G10_G10_045.fcs	PAClight2	P38	10	7181.28
HEK293_PAClight2_G10_G10_045.fcs	HEK293_PAClight2_G10_G10_045.fcs	PAClight2	P38	10	16417.4
HEK293_PAClight2_G10_G10_045.fcs	HEK293_PAClight2_G10_G10_045.fcs	PAClight2	P38	10	944.64
HEK293_PAClight2_G10_G10_045.fcs	HEK293_PAClight2_G10_G10_045.fcs	PAClight2	P38	10	10728
HEK293_PAClight2_G10_G10_045.fcs	HEK293_PAClight2_G10_G10_045.fcs	PAClight2	P38	10	13377.6
HEK293_PAClight2_G10_G10_045.fcs	HEK293_PAClight2_G10_G10_045.fcs	PAClight2	P38	10	8362.08
HEK293_PAClight2_G10_G10_045.fcs	HEK293_PAClight2_G10_G10_045.fcs	PAClight2	P38	10	16316.6
HEK293_PAClight2_G10_G10_045.fcs	HEK293_PAClight2_G10_G10_045.fcs	PAClight2	P38	10	4281.12
HEK293_PAClight2_G10_G10_045.fcs	HEK293_PAClight2_G10_G10_045.fcs	PAClight2	P38	10	950.4
HEK293_PAClight2_G10_G10_045.fcs	HEK293_PAClight2_G10_G10_045.fcs	PAClight2	P38	10	6196.32
HEK293_PAClight2_G10_G10_045.fcs	HEK293_PAClight2_G10_G10_045.fcs	PAClight2	P38	10	9372.96
HEK293_PAClight2_G10_G10_045.fcs	HEK293_PAClight2_G10_G10_045.fcs	PAClight2	P38	10	11797.9
HEK293_PAClight2_G10_G10_045.fcs	HEK293_PAClight2_G10_G10_045.fcs	PAClight2	P38	10	92.16
HEK293_PAClight2_G10_G10_045.fcs	HEK293_PAClight2_G10_G10_045.fcs	PAClight2	P38	10	2191.68
HEK293_PAClight2_G10_G10_045.fcs	HEK293_PAClight2_G10_G10_045.fcs	PAClight2	P38	10	7169.76
HEK293_PAClight2_G10_G10_045.fcs	HEK293_PAClight2_G10_G10_045.fcs	PAClight2	P38	10	11226.2
HEK293_PAClight2_G10_G10_045.fcs	HEK293_PAClight2_G10_G10_045.fcs	PAClight2	P38	10	11607.8
HEK293_PAClight2_G10_G10_045.fcs	HEK293_PAClight2_G10_G10_045.fcs	PAClight2	P38	10	14441.8
HEK293_PAClight2_G10_G10_045.fcs	HEK293_PAClight2_G10_G10_045.fcs	PAClight2	P38	10	7332.48
HEK293_PAClight2_G10_G10_045.fcs	HEK293_PAClight2_G10_G10_045.fcs	PAClight2	P38	10	10994.4
HEK293_PAClight2_G10_G10_045.fcs	HEK293_PAClight2_G10_G10_045.fcs	PAClight2	P38	10	7372.8
HEK293_PAClight2_G10_G10_045.fcs	HEK293_PAClight2_G10_G10_045.fcs	PAClight2	P38	10	20787.8
HEK293_PAClight2_G10_G10_045.fcs	HEK293_PAClight2_G10_G10_045.fcs	PAClight2	P38	10	14732.6
HEK293_PAClight2_G10_G10_045.fcs	HEK293_PAClight2_G10_G10_045.fcs	PAClight2	P38	10	8894.88
HEK293_PAClight2_G10_G10_045.fcs	HEK293_PAClight2_G10_G10_045.fcs	PAClight2	P38	10	8722.08
HEK293_PAClight2_G10_G10_045.fcs	HEK293_PAClight2_G10_G10_045.fcs	PAClight2	P38	10	7659.36
HEK293_PAClight2_G10_G10_045.fcs	HEK293_PAClight2_G10_G10_045.fcs	PAClight2	P38	10	11185.9
HEK293_PAClight2_G10_G10_045.fcs	HEK293_PAClight2_G10_G10_045.fcs	PAClight2	P38	10	1281.6
HEK293_PAClight2_G10_G10_045.fcs	HEK293_PAClight2_G10_G10_045.fcs	PAClight2	P38	10	1677.6
HEK293_PAClight2_G10_G10_045.fcs	HEK293_PAClight2_G10_G10_045.fcs	PAClight2	P38	10	9499.68
HEK293_PAClight2_G10_G10_045.fcs	HEK293_PAClight2_G10_G10_045.fcs	PAClight2	P38	10	6937.92
HEK293_PAClight2_G10_G10_045.fcs	HEK293_PAClight2_G10_G10_045.fcs	PAClight2	P38	10	3909.6
HEK293_PAClight2_G10_G10_045.fcs	HEK293_PAClight2_G10_G10_045.fcs	PAClight2	P38	10	6168.96
HEK293_PAClight2_G10_G10_045.fcs	HEK293_PAClight2_G10_G10_045.fcs	PAClight2	P38	10	21168
HEK293_PAClight2_G10_G10_045.fcs	HEK293_PAClight2_G10_G10_045.fcs	PAClight2	P38	10	63.36
HEK293_PAClight2_G10_G10_045.fcs	HEK293_PAClight2_G10_G10_045.fcs	PAClight2	P38	10	21957.1
HEK293_PAClight2_G10_G10_045.fcs	HEK293_PAClight2_G10_G10_045.fcs	PAClight2	P38	10	8724.96
HEK293_PAClight2_G10_G10_045.fcs	HEK293_PAClight2_G10_G10_045.fcs	PAClight2	P38	10	13004.6
HEK293_PAClight2_G10_G10_045.fcs	HEK293_PAClight2_G10_G10_045.fcs	PAClight2	P38	10	7411.68
HEK293_PAClight2_G10_G10_045.fcs	HEK293_PAClight2_G10_G10_045.fcs	PAClight2	P38	10	4374.72
HEK293_PAClight2_G10_G10_045.fcs	HEK293_PAClight2_G10_G10_045.fcs	PAClight2	P38	10	8408.16
HEK293_PAClight2_G10_G10_045.fcs	HEK293_PAClight2_G10_G10_045.fcs	PAClight2	P38	10	1562.4
HEK293_PAClight2_G10_G10_045.fcs	HEK293_PAClight2_G10_G10_045.fcs	PAClight2	P38	10	13037.8
HEK293_PAClight2_G10_G10_045.fcs	HEK293_PAClight2_G10_G10_045.fcs	PAClight2	P38	10	9842.4
HEK293_PAClight2_G10_G10_045.fcs	HEK293_PAClight2_G10_G10_045.fcs	PAClight2	P38	10	7115.04
HEK293_PAClight2_G10_G10_045.fcs	HEK293_PAClight2_G10_G10_045.fcs	PAClight2	P38	10	7642.08
HEK293_PAClight2_G10_G10_045.fcs	HEK293_PAClight2_G10_G10_045.fcs	PAClight2	P38	10	1435.68
HEK293_PAClight2_G10_G10_045.fcs	HEK293_PAClight2_G10_G10_045.fcs	PAClight2	P38	10	5338.08
HEK293_PAClight2_G10_G10_045.fcs	HEK293_PAClight2_G10_G10_045.fcs	PAClight2	P38	10	5898.24
HEK293_PAClight2_G10_G10_045.fcs	HEK293_PAClight2_G10_G10_045.fcs	PAClight2	P38	10	12258.7
HEK293_PAClight2_G10_G10_045.fcs	HEK293_PAClight2_G10_G10_045.fcs	PAClight2	P38	10	6878.88
HEK293_PAClight2_G10_G10_045.fcs	HEK293_PAClight2_G10_G10_045.fcs	PAClight2	P38	10	7002.72
HEK293_PAClight2_G10_G10_045.fcs	HEK293_PAClight2_G10_G10_045.fcs	PAClight2	P38	10	2233.44
HEK293_PAClight2_G10_G10_045.fcs	HEK293_PAClight2_G10_G10_045.fcs	PAClight2	P38	10	6703.2
HEK293_PAClight2_G10_G10_045.fcs	HEK293_PAClight2_G10_G10_045.fcs	PAClight2	P38	10	10291.7
HEK293_PAClight2_G10_G10_045.fcs	HEK293_PAClight2_G10_G10_045.fcs	PAClight2	P38	10	17693.3
HEK293_PAClight2_G10_G10_045.fcs	HEK293_PAClight2_G10_G10_045.fcs	PAClight2	P38	10	8588.16
HEK293_PAClight2_G10_G10_045.fcs	HEK293_PAClight2_G10_G10_045.fcs	PAClight2	P38	10	6480
HEK293_PAClight2_G10_G10_045.fcs	HEK293_PAClight2_G10_G10_045.fcs	PAClight2	P38	10	1594.08
HEK293_PAClight2_G10_G10_045.fcs	HEK293_PAClight2_G10_G10_045.fcs	PAClight2	P38	10	6001.92
HEK293_PAClight2_G10_G10_045.fcs	HEK293_PAClight2_G10_G10_045.fcs	PAClight2	P38	10	1419.84
HEK293_PAClight2_G10_G10_045.fcs	HEK293_PAClight2_G10_G10_045.fcs	PAClight2	P38	10	204.48
HEK293_PAClight2_G10_G10_045.fcs	HEK293_PAClight2_G10_G10_045.fcs	PAClight2	P38	10	20337.1
HEK293_PAClight2_G10_G10_045.fcs	HEK293_PAClight2_G10_G10_045.fcs	PAClight2	P38	10	7981.92
HEK293_PAClight2_G10_G10_045.fcs	HEK293_PAClight2_G10_G10_045.fcs	PAClight2	P38	10	11430.7
HEK293_PAClight2_G10_G10_045.fcs	HEK293_PAClight2_G10_G10_045.fcs	PAClight2	P38	10	7964.64
HEK293_PAClight2_G10_G10_045.fcs	HEK293_PAClight2_G10_G10_045.fcs	PAClight2	P38	10	9694.08
HEK293_PAClight2_G10_G10_045.fcs	HEK293_PAClight2_G10_G10_045.fcs	PAClight2	P38	10	6834.24
HEK293_PAClight2_G10_G10_045.fcs	HEK293_PAClight2_G10_G10_045.fcs	PAClight2	P38	10	218.88
HEK293_PAClight2_G10_G10_045.fcs	HEK293_PAClight2_G10_G10_045.fcs	PAClight2	P38	10	21297.6
HEK293_PAClight2_G10_G10_045.fcs	HEK293_PAClight2_G10_G10_045.fcs	PAClight2	P38	10	4331.52
HEK293_PAClight2_G10_G10_045.fcs	HEK293_PAClight2_G10_G10_045.fcs	PAClight2	P38	10	11465.3
HEK293_PAClight2_G10_G10_045.fcs	HEK293_PAClight2_G10_G10_045.fcs	PAClight2	P38	10	7626.24
HEK293_PAClight2_G10_G10_045.fcs	HEK293_PAClight2_G10_G10_045.fcs	PAClight2	P38	10	6423.84
HEK293_PAClight2_G10_G10_045.fcs	HEK293_PAClight2_G10_G10_045.fcs	PAClight2	P38	10	11721.6
HEK293_PAClight2_G10_G10_045.fcs	HEK293_PAClight2_G10_G10_045.fcs	PAClight2	P38	10	1817.28
HEK293_PAClight2_G10_G10_045.fcs	HEK293_PAClight2_G10_G10_045.fcs	PAClight2	P38	10	11118.2
HEK293_PAClight2_G10_G10_045.fcs	HEK293_PAClight2_G10_G10_045.fcs	PAClight2	P38	10	332.64
HEK293_PAClight2_G10_G10_045.fcs	HEK293_PAClight2_G10_G10_045.fcs	PAClight2	P38	10	9623.52
HEK293_PAClight2_G10_G10_045.fcs	HEK293_PAClight2_G10_G10_045.fcs	PAClight2	P38	10	4472.64
HEK293_PAClight2_G10_G10_045.fcs	HEK293_PAClight2_G10_G10_045.fcs	PAClight2	P38	10	5783.04
HEK293_PAClight2_G10_G10_045.fcs	HEK293_PAClight2_G10_G10_045.fcs	PAClight2	P38	10	5473.44
HEK293_PAClight2_G10_G10_045.fcs	HEK293_PAClight2_G10_G10_045.fcs	PAClight2	P38	10	4207.68
HEK293_PAClight2_G10_G10_045.fcs	HEK293_PAClight2_G10_G10_045.fcs	PAClight2	P38	10	4016.16
HEK293_PAClight2_G10_G10_045.fcs	HEK293_PAClight2_G10_G10_045.fcs	PAClight2	P38	10	10094.4
HEK293_PAClight2_G10_G10_045.fcs	HEK293_PAClight2_G10_G10_045.fcs	PAClight2	P38	10	4988.16
HEK293_PAClight2_G10_G10_045.fcs	HEK293_PAClight2_G10_G10_045.fcs	PAClight2	P38	10	9097.92
HEK293_PAClight2_G10_G10_045.fcs	HEK293_PAClight2_G10_G10_045.fcs	PAClight2	P38	10	10216.8
HEK293_PAClight2_G10_G10_045.fcs	HEK293_PAClight2_G10_G10_045.fcs	PAClight2	P38	10	7488
HEK293_PAClight2_G10_G10_045.fcs	HEK293_PAClight2_G10_G10_045.fcs	PAClight2	P38	10	4937.76
HEK293_PAClight2_G10_G10_045.fcs	HEK293_PAClight2_G10_G10_045.fcs	PAClight2	P38	10	3129.12
HEK293_PAClight2_G10_G10_045.fcs	HEK293_PAClight2_G10_G10_045.fcs	PAClight2	P38	10	12772.8
HEK293_PAClight2_G10_G10_045.fcs	HEK293_PAClight2_G10_G10_045.fcs	PAClight2	P38	10	7178.4
HEK293_PAClight2_G10_G10_045.fcs	HEK293_PAClight2_G10_G10_045.fcs	PAClight2	P38	10	7348.32
HEK293_PAClight2_G10_G10_045.fcs	HEK293_PAClight2_G10_G10_045.fcs	PAClight2	P38	10	2440.8
HEK293_PAClight2_G10_G10_045.fcs	HEK293_PAClight2_G10_G10_045.fcs	PAClight2	P38	10	12954.2
HEK293_PAClight2_G10_G10_045.fcs	HEK293_PAClight2_G10_G10_045.fcs	PAClight2	P38	10	7119.36
HEK293_PAClight2_G10_G10_045.fcs	HEK293_PAClight2_G10_G10_045.fcs	PAClight2	P38	10	13409.3
HEK293_PAClight2_G10_G10_045.fcs	HEK293_PAClight2_G10_G10_045.fcs	PAClight2	P38	10	10039.7
HEK293_PAClight2_G10_G10_045.fcs	HEK293_PAClight2_G10_G10_045.fcs	PAClight2	P38	10	3823.2
HEK293_PAClight2_G10_G10_045.fcs	HEK293_PAClight2_G10_G10_045.fcs	PAClight2	P38	10	6186.24
HEK293_PAClight2_G10_G10_045.fcs	HEK293_PAClight2_G10_G10_045.fcs	PAClight2	P38	10	12813.1
HEK293_PAClight2_G10_G10_045.fcs	HEK293_PAClight2_G10_G10_045.fcs	PAClight2	P38	10	6691.68
HEK293_PAClight2_G10_G10_045.fcs	HEK293_PAClight2_G10_G10_045.fcs	PAClight2	P38	10	1200.96
HEK293_PAClight2_G10_G10_045.fcs	HEK293_PAClight2_G10_G10_045.fcs	PAClight2	P38	10	10635.8
HEK293_PAClight2_G10_G10_045.fcs	HEK293_PAClight2_G10_G10_045.fcs	PAClight2	P38	10	8794.08
HEK293_PAClight2_G10_G10_045.fcs	HEK293_PAClight2_G10_G10_045.fcs	PAClight2	P38	10	9077.76
HEK293_PAClight2_G10_G10_045.fcs	HEK293_PAClight2_G10_G10_045.fcs	PAClight2	P38	10	3407.04
HEK293_PAClight2_G10_G10_045.fcs	HEK293_PAClight2_G10_G10_045.fcs	PAClight2	P38	10	4475.52
HEK293_PAClight2_G10_G10_045.fcs	HEK293_PAClight2_G10_G10_045.fcs	PAClight2	P38	10	4769.28
HEK293_PAClight2_G10_G10_045.fcs	HEK293_PAClight2_G10_G10_045.fcs	PAClight2	P38	10	11684.2
HEK293_PAClight2_G10_G10_045.fcs	HEK293_PAClight2_G10_G10_045.fcs	PAClight2	P38	10	82.08
HEK293_PAClight2_G10_G10_045.fcs	HEK293_PAClight2_G10_G10_045.fcs	PAClight2	P38	10	5533.92
HEK293_PAClight2_G10_G10_045.fcs	HEK293_PAClight2_G10_G10_045.fcs	PAClight2	P38	10	16261.9
HEK293_PAClight2_G10_G10_045.fcs	HEK293_PAClight2_G10_G10_045.fcs	PAClight2	P38	10	27691.2
HEK293_PAClight2_G10_G10_045.fcs	HEK293_PAClight2_G10_G10_045.fcs	PAClight2	P38	10	5657.76
HEK293_PAClight2_G10_G10_045.fcs	HEK293_PAClight2_G10_G10_045.fcs	PAClight2	P38	10	6966.72
HEK293_PAClight2_G10_G10_045.fcs	HEK293_PAClight2_G10_G10_045.fcs	PAClight2	P38	10	3695.04
HEK293_PAClight2_G10_G10_045.fcs	HEK293_PAClight2_G10_G10_045.fcs	PAClight2	P38	10	7984.8
HEK293_PAClight2_G10_G10_045.fcs	HEK293_PAClight2_G10_G10_045.fcs	PAClight2	P38	10	9214.56
HEK293_PAClight2_G10_G10_045.fcs	HEK293_PAClight2_G10_G10_045.fcs	PAClight2	P38	10	8153.28
HEK293_PAClight2_G10_G10_045.fcs	HEK293_PAClight2_G10_G10_045.fcs	PAClight2	P38	10	4455.36
HEK293_PAClight2_G10_G10_045.fcs	HEK293_PAClight2_G10_G10_045.fcs	PAClight2	P38	10	4628.16
HEK293_PAClight2_G10_G10_045.fcs	HEK293_PAClight2_G10_G10_045.fcs	PAClight2	P38	10	6579.36
HEK293_PAClight2_G10_G10_045.fcs	HEK293_PAClight2_G10_G10_045.fcs	PAClight2	P38	10	3728.16
HEK293_PAClight2_G10_G10_045.fcs	HEK293_PAClight2_G10_G10_045.fcs	PAClight2	P38	10	8189.28
HEK293_PAClight2_G10_G10_045.fcs	HEK293_PAClight2_G10_G10_045.fcs	PAClight2	P38	10	10794.2
HEK293_PAClight2_G10_G10_045.fcs	HEK293_PAClight2_G10_G10_045.fcs	PAClight2	P38	10	28.8
HEK293_PAClight2_G10_G10_045.fcs	HEK293_PAClight2_G10_G10_045.fcs	PAClight2	P38	10	5179.68
HEK293_PAClight2_G10_G10_045.fcs	HEK293_PAClight2_G10_G10_045.fcs	PAClight2	P38	10	24835.7
HEK293_PAClight2_G10_G10_045.fcs	HEK293_PAClight2_G10_G10_045.fcs	PAClight2	P38	10	3427.2
HEK293_PAClight2_G10_G10_045.fcs	HEK293_PAClight2_G10_G10_045.fcs	PAClight2	P38	10	4410.72
HEK293_PAClight2_G10_G10_045.fcs	HEK293_PAClight2_G10_G10_045.fcs	PAClight2	P38	10	2259.36
HEK293_PAClight2_G10_G10_045.fcs	HEK293_PAClight2_G10_G10_045.fcs	PAClight2	P38	10	96.48
HEK293_PAClight2_G10_G10_045.fcs	HEK293_PAClight2_G10_G10_045.fcs	PAClight2	P38	10	5641.92
HEK293_PAClight2_G10_G10_045.fcs	HEK293_PAClight2_G10_G10_045.fcs	PAClight2	P38	10	6497.28
HEK293_PAClight2_G10_G10_045.fcs	HEK293_PAClight2_G10_G10_045.fcs	PAClight2	P38	10	10542.2
HEK293_PAClight2_G10_G10_045.fcs	HEK293_PAClight2_G10_G10_045.fcs	PAClight2	P38	10	7974.72
HEK293_PAClight2_G10_G10_045.fcs	HEK293_PAClight2_G10_G10_045.fcs	PAClight2	P38	10	6494.4
HEK293_PAClight2_G10_G10_045.fcs	HEK293_PAClight2_G10_G10_045.fcs	PAClight2	P38	10	8108.64
HEK293_PAClight2_G10_G10_045.fcs	HEK293_PAClight2_G10_G10_045.fcs	PAClight2	P38	10	4960.8
HEK293_PAClight2_G10_G10_045.fcs	HEK293_PAClight2_G10_G10_045.fcs	PAClight2	P38	10	8350.56
HEK293_PAClight2_G10_G10_045.fcs	HEK293_PAClight2_G10_G10_045.fcs	PAClight2	P38	10	5778.72
HEK293_PAClight2_G10_G10_045.fcs	HEK293_PAClight2_G10_G10_045.fcs	PAClight2	P38	10	8928
HEK293_PAClight2_G10_G10_045.fcs	HEK293_PAClight2_G10_G10_045.fcs	PAClight2	P38	10	4671.36
HEK293_PAClight2_G10_G10_045.fcs	HEK293_PAClight2_G10_G10_045.fcs	PAClight2	P38	10	5227.2
HEK293_PAClight2_G10_G10_045.fcs	HEK293_PAClight2_G10_G10_045.fcs	PAClight2	P38	10	6338.88
HEK293_PAClight2_G10_G10_045.fcs	HEK293_PAClight2_G10_G10_045.fcs	PAClight2	P38	10	6893.28
HEK293_PAClight2_G10_G10_045.fcs	HEK293_PAClight2_G10_G10_045.fcs	PAClight2	P38	10	4413.6
HEK293_PAClight2_G10_G10_045.fcs	HEK293_PAClight2_G10_G10_045.fcs	PAClight2	P38	10	106.56
HEK293_PAClight2_G10_G10_045.fcs	HEK293_PAClight2_G10_G10_045.fcs	PAClight2	P38	10	5433.12
HEK293_PAClight2_G10_G10_045.fcs	HEK293_PAClight2_G10_G10_045.fcs	PAClight2	P38	10	7282.08
HEK293_PAClight2_G10_G10_045.fcs	HEK293_PAClight2_G10_G10_045.fcs	PAClight2	P38	10	744.48
HEK293_PAClight2_G10_G10_045.fcs	HEK293_PAClight2_G10_G10_045.fcs	PAClight2	P38	10	2206.08
HEK293_PAClight2_G10_G10_045.fcs	HEK293_PAClight2_G10_G10_045.fcs	PAClight2	P38	10	53.28
HEK293_PAClight2_G10_G10_045.fcs	HEK293_PAClight2_G10_G10_045.fcs	PAClight2	P38	10	11134.1
HEK293_PAClight2_G10_G10_045.fcs	HEK293_PAClight2_G10_G10_045.fcs	PAClight2	P38	10	3926.88
HEK293_PAClight2_G10_G10_045.fcs	HEK293_PAClight2_G10_G10_045.fcs	PAClight2	P38	10	394.56
HEK293_PAClight2_G10_G10_045.fcs	HEK293_PAClight2_G10_G10_045.fcs	PAClight2	P38	10	7948.8
HEK293_PAClight2_G10_G10_045.fcs	HEK293_PAClight2_G10_G10_045.fcs	PAClight2	P38	10	5569.92
HEK293_PAClight2_G10_G10_045.fcs	HEK293_PAClight2_G10_G10_045.fcs	PAClight2	P38	10	3758.4
HEK293_PAClight2_G10_G10_045.fcs	HEK293_PAClight2_G10_G10_045.fcs	PAClight2	P38	10	14631.8
HEK293_PAClight2_G10_G10_045.fcs	HEK293_PAClight2_G10_G10_045.fcs	PAClight2	P38	10	5443.2
HEK293_PAClight2_G10_G10_045.fcs	HEK293_PAClight2_G10_G10_045.fcs	PAClight2	P38	10	8841.6
HEK293_PAClight2_G10_G10_045.fcs	HEK293_PAClight2_G10_G10_045.fcs	PAClight2	P38	10	142.56
HEK293_PAClight2_G10_G10_045.fcs	HEK293_PAClight2_G10_G10_045.fcs	PAClight2	P38	10	2782.08
HEK293_PAClight2_G10_G10_045.fcs	HEK293_PAClight2_G10_G10_045.fcs	PAClight2	P38	10	8434.08
HEK293_PAClight2_G10_G10_045.fcs	HEK293_PAClight2_G10_G10_045.fcs	PAClight2	P38	10	3480.48
HEK293_PAClight2_G10_G10_045.fcs	HEK293_PAClight2_G10_G10_045.fcs	PAClight2	P38	10	3830.4
HEK293_PAClight2_G10_G10_045.fcs	HEK293_PAClight2_G10_G10_045.fcs	PAClight2	P38	10	1493.28
HEK293_PAClight2_G10_G10_045.fcs	HEK293_PAClight2_G10_G10_045.fcs	PAClight2	P38	10	5990.4
HEK293_PAClight2_G10_G10_045.fcs	HEK293_PAClight2_G10_G10_045.fcs	PAClight2	P38	10	2891.52
HEK293_PAClight2_G10_G10_045.fcs	HEK293_PAClight2_G10_G10_045.fcs	PAClight2	P38	10	6854.4
HEK293_PAClight2_G10_G10_045.fcs	HEK293_PAClight2_G10_G10_045.fcs	PAClight2	P38	10	8951.04
HEK293_PAClight2_G10_G10_045.fcs	HEK293_PAClight2_G10_G10_045.fcs	PAClight2	P38	10	5569.92
HEK293_PAClight2_G10_G10_045.fcs	HEK293_PAClight2_G10_G10_045.fcs	PAClight2	P38	10	7315.2
HEK293_PAClight2_G10_G10_045.fcs	HEK293_PAClight2_G10_G10_045.fcs	PAClight2	P38	10	4181.76
HEK293_PAClight2_G10_G10_045.fcs	HEK293_PAClight2_G10_G10_045.fcs	PAClight2	P38	10	2898.72
HEK293_PAClight2_G10_G10_045.fcs	HEK293_PAClight2_G10_G10_045.fcs	PAClight2	P38	10	11692.8
HEK293_PAClight2_G10_G10_045.fcs	HEK293_PAClight2_G10_G10_045.fcs	PAClight2	P38	10	6314.4
HEK293_PAClight2_G10_G10_045.fcs	HEK293_PAClight2_G10_G10_045.fcs	PAClight2	P38	10	5535.36
HEK293_PAClight2_G10_G10_045.fcs	HEK293_PAClight2_G10_G10_045.fcs	PAClight2	P38	10	14721.1
HEK293_PAClight2_G10_G10_045.fcs	HEK293_PAClight2_G10_G10_045.fcs	PAClight2	P38	10	3522.24
HEK293_PAClight2_G10_G10_045.fcs	HEK293_PAClight2_G10_G10_045.fcs	PAClight2	P38	10	354.24
HEK293_PAClight2_G10_G10_045.fcs	HEK293_PAClight2_G10_G10_045.fcs	PAClight2	P38	10	9512.64
HEK293_PAClight2_G10_G10_045.fcs	HEK293_PAClight2_G10_G10_045.fcs	PAClight2	P38	10	2730.24
HEK293_PAClight2_G10_G10_045.fcs	HEK293_PAClight2_G10_G10_045.fcs	PAClight2	P38	10	8481.6
HEK293_PAClight2_G10_G10_045.fcs	HEK293_PAClight2_G10_G10_045.fcs	PAClight2	P38	10	11806.6
HEK293_PAClight2_G10_G10_045.fcs	HEK293_PAClight2_G10_G10_045.fcs	PAClight2	P38	10	6016.32
HEK293_PAClight2_G10_G10_045.fcs	HEK293_PAClight2_G10_G10_045.fcs	PAClight2	P38	10	246.24
HEK293_PAClight2_G10_G10_045.fcs	HEK293_PAClight2_G10_G10_045.fcs	PAClight2	P38	10	1123.2
HEK293_PAClight2_G10_G10_045.fcs	HEK293_PAClight2_G10_G10_045.fcs	PAClight2	P38	10	8131.68
HEK293_PAClight2_G10_G10_045.fcs	HEK293_PAClight2_G10_G10_045.fcs	PAClight2	P38	10	4186.08
HEK293_PAClight2_G10_G10_045.fcs	HEK293_PAClight2_G10_G10_045.fcs	PAClight2	P38	10	8408.16
HEK293_PAClight2_G10_G10_045.fcs	HEK293_PAClight2_G10_G10_045.fcs	PAClight2	P38	10	280.8
HEK293_PAClight2_G10_G10_045.fcs	HEK293_PAClight2_G10_G10_045.fcs	PAClight2	P38	10	6547.68
HEK293_PAClight2_G10_G10_045.fcs	HEK293_PAClight2_G10_G10_045.fcs	PAClight2	P38	10	6036.48
HEK293_PAClight2_G10_G10_045.fcs	HEK293_PAClight2_G10_G10_045.fcs	PAClight2	P38	10	211.68
HEK293_PAClight2_G10_G10_045.fcs	HEK293_PAClight2_G10_G10_045.fcs	PAClight2	P38	10	5356.8
HEK293_PAClight2_G10_G10_045.fcs	HEK293_PAClight2_G10_G10_045.fcs	PAClight2	P38	10	-908.64
HEK293_PAClight2_G10_G10_045.fcs	HEK293_PAClight2_G10_G10_045.fcs	PAClight2	P38	10	12569.8
HEK293_PAClight2_G10_G10_045.fcs	HEK293_PAClight2_G10_G10_045.fcs	PAClight2	P38	10	27743
HEK293_PAClight2_G10_G10_045.fcs	HEK293_PAClight2_G10_G10_045.fcs	PAClight2	P38	10	3828.96
HEK293_PAClight2_G10_G10_045.fcs	HEK293_PAClight2_G10_G10_045.fcs	PAClight2	P38	10	9624.96
HEK293_PAClight2_G10_G10_045.fcs	HEK293_PAClight2_G10_G10_045.fcs	PAClight2	P38	10	23588.6
HEK293_PAClight2_G10_G10_045.fcs	HEK293_PAClight2_G10_G10_045.fcs	PAClight2	P38	10	4753.44
HEK293_PAClight2_G10_G10_045.fcs	HEK293_PAClight2_G10_G10_045.fcs	PAClight2	P38	10	2674.08
HEK293_PAClight2_G10_G10_045.fcs	HEK293_PAClight2_G10_G10_045.fcs	PAClight2	P38	10	1156.32
HEK293_PAClight2_G10_G10_045.fcs	HEK293_PAClight2_G10_G10_045.fcs	PAClight2	P38	10	5004
HEK293_PAClight2_G10_G10_045.fcs	HEK293_PAClight2_G10_G10_045.fcs	PAClight2	P38	10	2082.24
HEK293_PAClight2_G10_G10_045.fcs	HEK293_PAClight2_G10_G10_045.fcs	PAClight2	P38	10	5970.24
HEK293_PAClight2_G10_G10_045.fcs	HEK293_PAClight2_G10_G10_045.fcs	PAClight2	P38	10	5575.68
HEK293_PAClight2_G10_G10_045.fcs	HEK293_PAClight2_G10_G10_045.fcs	PAClight2	P38	10	8454.24
HEK293_PAClight2_G10_G10_045.fcs	HEK293_PAClight2_G10_G10_045.fcs	PAClight2	P38	10	6547.68
HEK293_PAClight2_G10_G10_045.fcs	HEK293_PAClight2_G10_G10_045.fcs	PAClight2	P38	10	39833.3
HEK293_PAClight2_G10_G10_045.fcs	HEK293_PAClight2_G10_G10_045.fcs	PAClight2	P38	10	3113.28
HEK293_PAClight2_G10_G10_045.fcs	HEK293_PAClight2_G10_G10_045.fcs	PAClight2	P38	10	57653.3
HEK293_PAClight2_G10_G10_045.fcs	HEK293_PAClight2_G10_G10_045.fcs	PAClight2	P38	10	6266.88
HEK293_PAClight2_G10_G10_045.fcs	HEK293_PAClight2_G10_G10_045.fcs	PAClight2	P38	10	34367
HEK293_PAClight2_G10_G10_045.fcs	HEK293_PAClight2_G10_G10_045.fcs	PAClight2	P38	10	5297.76
HEK293_PAClight2_G10_G10_045.fcs	HEK293_PAClight2_G10_G10_045.fcs	PAClight2	P38	10	5126.4
HEK293_PAClight2_G10_G10_045.fcs	HEK293_PAClight2_G10_G10_045.fcs	PAClight2	P38	10	8760.96
HEK293_PAClight2_G10_G10_045.fcs	HEK293_PAClight2_G10_G10_045.fcs	PAClight2	P38	10	701.28
HEK293_PAClight2_G10_G10_045.fcs	HEK293_PAClight2_G10_G10_045.fcs	PAClight2	P38	10	13412.2
HEK293_PAClight2_G10_G10_045.fcs	HEK293_PAClight2_G10_G10_045.fcs	PAClight2	P38	10	2740.32
HEK293_PAClight2_G10_G10_045.fcs	HEK293_PAClight2_G10_G10_045.fcs	PAClight2	P38	10	6518.88
HEK293_PAClight2_G10_G10_045.fcs	HEK293_PAClight2_G10_G10_045.fcs	PAClight2	P38	10	5883.84
HEK293_PAClight2_G10_G10_045.fcs	HEK293_PAClight2_G10_G10_045.fcs	PAClight2	P38	10	20240.6
HEK293_PAClight2_G10_G10_045.fcs	HEK293_PAClight2_G10_G10_045.fcs	PAClight2	P38	10	6670.08
HEK293_PAClight2_G10_G10_045.fcs	HEK293_PAClight2_G10_G10_045.fcs	PAClight2	P38	10	9551.52
HEK293_PAClight2_G10_G10_045.fcs	HEK293_PAClight2_G10_G10_045.fcs	PAClight2	P38	10	18972
HEK293_PAClight2_G10_G10_045.fcs	HEK293_PAClight2_G10_G10_045.fcs	PAClight2	P38	10	8148.96
HEK293_PAClight2_G10_G10_045.fcs	HEK293_PAClight2_G10_G10_045.fcs	PAClight2	P38	10	63637.9
HEK293_PAClight2_G10_G10_045.fcs	HEK293_PAClight2_G10_G10_045.fcs	PAClight2	P38	10	15134.4
HEK293_PAClight2_G10_G10_045.fcs	HEK293_PAClight2_G10_G10_045.fcs	PAClight2	P38	10	36023
HEK293_PAClight2_G10_G10_045.fcs	HEK293_PAClight2_G10_G10_045.fcs	PAClight2	P38	10	5757.12
HEK293_PAClight2_G10_G10_045.fcs	HEK293_PAClight2_G10_G10_045.fcs	PAClight2	P38	10	10061.3
HEK293_PAClight2_G10_G10_045.fcs	HEK293_PAClight2_G10_G10_045.fcs	PAClight2	P38	10	9519.84
HEK293_PAClight2_G10_G10_045.fcs	HEK293_PAClight2_G10_G10_045.fcs	PAClight2	P38	10	4871.52
HEK293_PAClight2_G10_G10_045.fcs	HEK293_PAClight2_G10_G10_045.fcs	PAClight2	P38	10	8851.68
HEK293_PAClight2_G10_G10_045.fcs	HEK293_PAClight2_G10_G10_045.fcs	PAClight2	P38	10	10978.6
HEK293_PAClight2_G10_G10_045.fcs	HEK293_PAClight2_G10_G10_045.fcs	PAClight2	P38	10	8075.52
HEK293_PAClight2_G10_G10_045.fcs	HEK293_PAClight2_G10_G10_045.fcs	PAClight2	P38	10	9810.72
HEK293_PAClight2_G10_G10_045.fcs	HEK293_PAClight2_G10_G10_045.fcs	PAClight2	P38	10	5319.36
HEK293_PAClight2_G10_G10_045.fcs	HEK293_PAClight2_G10_G10_045.fcs	PAClight2	P38	10	10193.8
HEK293_PAClight2_G10_G10_045.fcs	HEK293_PAClight2_G10_G10_045.fcs	PAClight2	P38	10	5847.84
HEK293_PAClight2_G10_G10_045.fcs	HEK293_PAClight2_G10_G10_045.fcs	PAClight2	P38	10	28493.3
HEK293_PAClight2_G10_G10_045.fcs	HEK293_PAClight2_G10_G10_045.fcs	PAClight2	P38	10	11677
HEK293_PAClight2_G10_G10_045.fcs	HEK293_PAClight2_G10_G10_045.fcs	PAClight2	P38	10	34.56
HEK293_PAClight2_G10_G10_045.fcs	HEK293_PAClight2_G10_G10_045.fcs	PAClight2	P38	10	5293.44
HEK293_PAClight2_G10_G10_045.fcs	HEK293_PAClight2_G10_G10_045.fcs	PAClight2	P38	10	1180.8
HEK293_PAClight2_G10_G10_045.fcs	HEK293_PAClight2_G10_G10_045.fcs	PAClight2	P38	10	8608.32
HEK293_PAClight2_G10_G10_045.fcs	HEK293_PAClight2_G10_G10_045.fcs	PAClight2	P38	10	2563.2
HEK293_PAClight2_G10_G10_045.fcs	HEK293_PAClight2_G10_G10_045.fcs	PAClight2	P38	10	578.88
HEK293_PAClight2_G10_G10_045.fcs	HEK293_PAClight2_G10_G10_045.fcs	PAClight2	P38	10	15959.5
HEK293_PAClight2_G10_G10_045.fcs	HEK293_PAClight2_G10_G10_045.fcs	PAClight2	P38	10	34105
HEK293_PAClight2_G10_G10_045.fcs	HEK293_PAClight2_G10_G10_045.fcs	PAClight2	P38	10	11322.7
HEK293_PAClight2_G10_G10_045.fcs	HEK293_PAClight2_G10_G10_045.fcs	PAClight2	P38	10	4286.88
HEK293_PAClight2_G10_G10_045.fcs	HEK293_PAClight2_G10_G10_045.fcs	PAClight2	P38	10	2314.08
HEK293_PAClight2_G10_G10_045.fcs	HEK293_PAClight2_G10_G10_045.fcs	PAClight2	P38	10	8424
HEK293_PAClight2_G10_G10_045.fcs	HEK293_PAClight2_G10_G10_045.fcs	PAClight2	P38	10	12051.4
HEK293_PAClight2_G10_G10_045.fcs	HEK293_PAClight2_G10_G10_045.fcs	PAClight2	P38	10	2916
HEK293_PAClight2_G10_G10_045.fcs	HEK293_PAClight2_G10_G10_045.fcs	PAClight2	P38	10	12944.2
HEK293_PAClight2_G10_G10_045.fcs	HEK293_PAClight2_G10_G10_045.fcs	PAClight2	P38	10	12865
HEK293_PAClight2_G10_G10_045.fcs	HEK293_PAClight2_G10_G10_045.fcs	PAClight2	P38	10	13288.3
HEK293_PAClight2_G10_G10_045.fcs	HEK293_PAClight2_G10_G10_045.fcs	PAClight2	P38	10	6919.2
HEK293_PAClight2_G10_G10_045.fcs	HEK293_PAClight2_G10_G10_045.fcs	PAClight2	P38	10	9541.44
HEK293_PAClight2_G10_G10_045.fcs	HEK293_PAClight2_G10_G10_045.fcs	PAClight2	P38	10	9516.96
HEK293_PAClight2_G10_G10_045.fcs	HEK293_PAClight2_G10_G10_045.fcs	PAClight2	P38	10	2602.08
HEK293_PAClight2_G10_G10_045.fcs	HEK293_PAClight2_G10_G10_045.fcs	PAClight2	P38	10	4468.32
HEK293_PAClight2_G10_G10_045.fcs	HEK293_PAClight2_G10_G10_045.fcs	PAClight2	P38	10	5667.84
HEK293_PAClight2_G10_G10_045.fcs	HEK293_PAClight2_G10_G10_045.fcs	PAClight2	P38	10	11054.9
HEK293_PAClight2_G10_G10_045.fcs	HEK293_PAClight2_G10_G10_045.fcs	PAClight2	P38	10	11070.7
HEK293_PAClight2_G10_G10_045.fcs	HEK293_PAClight2_G10_G10_045.fcs	PAClight2	P38	10	10661.8
HEK293_PAClight2_G10_G10_045.fcs	HEK293_PAClight2_G10_G10_045.fcs	PAClight2	P38	10	15471.4
HEK293_PAClight2_G10_G10_045.fcs	HEK293_PAClight2_G10_G10_045.fcs	PAClight2	P38	10	18807.8
HEK293_PAClight2_G10_G10_045.fcs	HEK293_PAClight2_G10_G10_045.fcs	PAClight2	P38	10	4445.28
HEK293_PAClight2_G10_G10_045.fcs	HEK293_PAClight2_G10_G10_045.fcs	PAClight2	P38	10	14912.6
HEK293_PAClight2_G10_G10_045.fcs	HEK293_PAClight2_G10_G10_045.fcs	PAClight2	P38	10	7974.72
HEK293_PAClight2_G10_G10_045.fcs	HEK293_PAClight2_G10_G10_045.fcs	PAClight2	P38	10	5643.36
HEK293_PAClight2_G10_G10_045.fcs	HEK293_PAClight2_G10_G10_045.fcs	PAClight2	P38	10	4298.4
HEK293_PAClight2_G10_G10_045.fcs	HEK293_PAClight2_G10_G10_045.fcs	PAClight2	P38	10	4367.52
HEK293_PAClight2_G10_G10_045.fcs	HEK293_PAClight2_G10_G10_045.fcs	PAClight2	P38	10	5807.52
HEK293_PAClight2_G10_G10_045.fcs	HEK293_PAClight2_G10_G10_045.fcs	PAClight2	P38	10	13682.9
HEK293_PAClight2_G10_G10_045.fcs	HEK293_PAClight2_G10_G10_045.fcs	PAClight2	P38	10	8634.24
HEK293_PAClight2_G10_G10_045.fcs	HEK293_PAClight2_G10_G10_045.fcs	PAClight2	P38	10	12362.4
HEK293_PAClight2_G10_G10_045.fcs	HEK293_PAClight2_G10_G10_045.fcs	PAClight2	P38	10	826.56
HEK293_PAClight2_G10_G10_045.fcs	HEK293_PAClight2_G10_G10_045.fcs	PAClight2	P38	10	9560.16
HEK293_PAClight2_G10_G10_045.fcs	HEK293_PAClight2_G10_G10_045.fcs	PAClight2	P38	10	2894.4
HEK293_PAClight2_G10_G10_045.fcs	HEK293_PAClight2_G10_G10_045.fcs	PAClight2	P38	10	3919.68
HEK293_PAClight2_G10_G10_045.fcs	HEK293_PAClight2_G10_G10_045.fcs	PAClight2	P38	10	11952
HEK293_PAClight2_G10_G10_045.fcs	HEK293_PAClight2_G10_G10_045.fcs	PAClight2	P38	10	7668
HEK293_PAClight2_G10_G10_045.fcs	HEK293_PAClight2_G10_G10_045.fcs	PAClight2	P38	10	6779.52
HEK293_PAClight2_G10_G10_045.fcs	HEK293_PAClight2_G10_G10_045.fcs	PAClight2	P38	10	21116.2
HEK293_PAClight2_G10_G10_045.fcs	HEK293_PAClight2_G10_G10_045.fcs	PAClight2	P38	10	4330.08
HEK293_PAClight2_G10_G10_045.fcs	HEK293_PAClight2_G10_G10_045.fcs	PAClight2	P38	10	7823.52
HEK293_PAClight2_G10_G10_045.fcs	HEK293_PAClight2_G10_G10_045.fcs	PAClight2	P38	10	6913.44
HEK293_PAClight2_G10_G10_045.fcs	HEK293_PAClight2_G10_G10_045.fcs	PAClight2	P38	10	18406.1
HEK293_PAClight2_G10_G10_045.fcs	HEK293_PAClight2_G10_G10_045.fcs	PAClight2	P38	10	8899.2
HEK293_PAClight2_G10_G10_045.fcs	HEK293_PAClight2_G10_G10_045.fcs	PAClight2	P38	10	7801.92
HEK293_PAClight2_G10_G10_045.fcs	HEK293_PAClight2_G10_G10_045.fcs	PAClight2	P38	10	3679.2
HEK293_PAClight2_G10_G10_045.fcs	HEK293_PAClight2_G10_G10_045.fcs	PAClight2	P38	10	6396.48
HEK293_PAClight2_G10_G10_045.fcs	HEK293_PAClight2_G10_G10_045.fcs	PAClight2	P38	10	9220.32
HEK293_PAClight2_G10_G10_045.fcs	HEK293_PAClight2_G10_G10_045.fcs	PAClight2	P38	10	7110.72
HEK293_PAClight2_G10_G10_045.fcs	HEK293_PAClight2_G10_G10_045.fcs	PAClight2	P38	10	46.08
HEK293_PAClight2_G10_G10_045.fcs	HEK293_PAClight2_G10_G10_045.fcs	PAClight2	P38	10	7905.6
HEK293_PAClight2_G10_G10_045.fcs	HEK293_PAClight2_G10_G10_045.fcs	PAClight2	P38	10	23070.2
HEK293_PAClight2_G10_G10_045.fcs	HEK293_PAClight2_G10_G10_045.fcs	PAClight2	P38	10	4668.48
HEK293_PAClight2_G10_G10_045.fcs	HEK293_PAClight2_G10_G10_045.fcs	PAClight2	P38	10	3077.28
HEK293_PAClight2_G10_G10_045.fcs	HEK293_PAClight2_G10_G10_045.fcs	PAClight2	P38	10	6566.4
HEK293_PAClight2_G10_G10_045.fcs	HEK293_PAClight2_G10_G10_045.fcs	PAClight2	P38	10	9226.08
HEK293_PAClight2_G10_G10_045.fcs	HEK293_PAClight2_G10_G10_045.fcs	PAClight2	P38	10	20077.9
HEK293_PAClight2_G10_G10_045.fcs	HEK293_PAClight2_G10_G10_045.fcs	PAClight2	P38	10	6089.76
HEK293_PAClight2_G10_G10_045.fcs	HEK293_PAClight2_G10_G10_045.fcs	PAClight2	P38	10	9527.04
HEK293_PAClight2_G10_G10_045.fcs	HEK293_PAClight2_G10_G10_045.fcs	PAClight2	P38	10	10141.9
HEK293_PAClight2_G10_G10_045.fcs	HEK293_PAClight2_G10_G10_045.fcs	PAClight2	P38	10	14005.4
HEK293_PAClight2_G10_G10_045.fcs	HEK293_PAClight2_G10_G10_045.fcs	PAClight2	P38	10	9087.84
HEK293_PAClight2_G10_G10_045.fcs	HEK293_PAClight2_G10_G10_045.fcs	PAClight2	P38	10	10337.8
HEK293_PAClight2_G10_G10_045.fcs	HEK293_PAClight2_G10_G10_045.fcs	PAClight2	P38	10	10297.4
HEK293_PAClight2_G10_G10_045.fcs	HEK293_PAClight2_G10_G10_045.fcs	PAClight2	P38	10	5273.28
HEK293_PAClight2_G10_G10_045.fcs	HEK293_PAClight2_G10_G10_045.fcs	PAClight2	P38	10	2941.92
HEK293_PAClight2_G10_G10_045.fcs	HEK293_PAClight2_G10_G10_045.fcs	PAClight2	P38	10	6269.76
HEK293_PAClight2_G10_G10_045.fcs	HEK293_PAClight2_G10_G10_045.fcs	PAClight2	P38	10	4982.4
HEK293_PAClight2_G10_G10_045.fcs	HEK293_PAClight2_G10_G10_045.fcs	PAClight2	P38	10	33184.8
HEK293_PAClight2_G10_G10_045.fcs	HEK293_PAClight2_G10_G10_045.fcs	PAClight2	P38	10	4017.6
HEK293_PAClight2_G10_G10_045.fcs	HEK293_PAClight2_G10_G10_045.fcs	PAClight2	P38	10	351.36
HEK293_PAClight2_G10_G10_045.fcs	HEK293_PAClight2_G10_G10_045.fcs	PAClight2	P38	10	12687.8
HEK293_PAClight2_G10_G10_045.fcs	HEK293_PAClight2_G10_G10_045.fcs	PAClight2	P38	10	9609.12
HEK293_PAClight2_G10_G10_045.fcs	HEK293_PAClight2_G10_G10_045.fcs	PAClight2	P38	10	9724.32
HEK293_PAClight2_G10_G10_045.fcs	HEK293_PAClight2_G10_G10_045.fcs	PAClight2	P38	10	13559
HEK293_PAClight2_G10_G10_045.fcs	HEK293_PAClight2_G10_G10_045.fcs	PAClight2	P38	10	9142.56
HEK293_PAClight2_G10_G10_045.fcs	HEK293_PAClight2_G10_G10_045.fcs	PAClight2	P38	10	8328.96
HEK293_PAClight2_G10_G10_045.fcs	HEK293_PAClight2_G10_G10_045.fcs	PAClight2	P38	10	15025
HEK293_PAClight2_G10_G10_045.fcs	HEK293_PAClight2_G10_G10_045.fcs	PAClight2	P38	10	3029.76
HEK293_PAClight2_G10_G10_045.fcs	HEK293_PAClight2_G10_G10_045.fcs	PAClight2	P38	10	8470.08
HEK293_PAClight2_G10_G10_045.fcs	HEK293_PAClight2_G10_G10_045.fcs	PAClight2	P38	10	14932.8
HEK293_PAClight2_G10_G10_045.fcs	HEK293_PAClight2_G10_G10_045.fcs	PAClight2	P38	10	6278.4
HEK293_PAClight2_G10_G10_045.fcs	HEK293_PAClight2_G10_G10_045.fcs	PAClight2	P38	10	8064
HEK293_PAClight2_G10_G10_045.fcs	HEK293_PAClight2_G10_G10_045.fcs	PAClight2	P38	10	10499
HEK293_PAClight2_G10_G10_045.fcs	HEK293_PAClight2_G10_G10_045.fcs	PAClight2	P38	10	8242.56
HEK293_PAClight2_G10_G10_045.fcs	HEK293_PAClight2_G10_G10_045.fcs	PAClight2	P38	10	9756
HEK293_PAClight2_G10_G10_045.fcs	HEK293_PAClight2_G10_G10_045.fcs	PAClight2	P38	10	15252.5
HEK293_PAClight2_G10_G10_045.fcs	HEK293_PAClight2_G10_G10_045.fcs	PAClight2	P38	10	7788.96
HEK293_PAClight2_G10_G10_045.fcs	HEK293_PAClight2_G10_G10_045.fcs	PAClight2	P38	10	50.4
HEK293_PAClight2_G10_G10_045.fcs	HEK293_PAClight2_G10_G10_045.fcs	PAClight2	P38	10	8192.16
HEK293_PAClight2_G10_G10_045.fcs	HEK293_PAClight2_G10_G10_045.fcs	PAClight2	P38	10	8438.4
HEK293_PAClight2_G10_G10_045.fcs	HEK293_PAClight2_G10_G10_045.fcs	PAClight2	P38	10	1942.56
HEK293_PAClight2_G10_G10_045.fcs	HEK293_PAClight2_G10_G10_045.fcs	PAClight2	P38	10	14485
HEK293_PAClight2_G10_G10_045.fcs	HEK293_PAClight2_G10_G10_045.fcs	PAClight2	P38	10	48064.3
HEK293_PAClight2_G10_G10_045.fcs	HEK293_PAClight2_G10_G10_045.fcs	PAClight2	P38	10	21519.4
HEK293_PAClight2_G10_G10_045.fcs	HEK293_PAClight2_G10_G10_045.fcs	PAClight2	P38	10	1260
HEK293_PAClight2_G10_G10_045.fcs	HEK293_PAClight2_G10_G10_045.fcs	PAClight2	P38	10	10801.4
HEK293_PAClight2_G10_G10_045.fcs	HEK293_PAClight2_G10_G10_045.fcs	PAClight2	P38	10	5232.96
HEK293_PAClight2_G10_G10_045.fcs	HEK293_PAClight2_G10_G10_045.fcs	PAClight2	P38	10	8033.76
HEK293_PAClight2_G10_G10_045.fcs	HEK293_PAClight2_G10_G10_045.fcs	PAClight2	P38	10	3506.4
HEK293_PAClight2_G10_G10_045.fcs	HEK293_PAClight2_G10_G10_045.fcs	PAClight2	P38	10	24350.4
HEK293_PAClight2_G10_G10_045.fcs	HEK293_PAClight2_G10_G10_045.fcs	PAClight2	P38	10	7117.92
HEK293_PAClight2_G10_G10_045.fcs	HEK293_PAClight2_G10_G10_045.fcs	PAClight2	P38	10	5630.4
HEK293_PAClight2_G10_G10_045.fcs	HEK293_PAClight2_G10_G10_045.fcs	PAClight2	P38	10	4207.68
HEK293_PAClight2_G10_G10_045.fcs	HEK293_PAClight2_G10_G10_045.fcs	PAClight2	P38	10	35166.2
HEK293_PAClight2_G10_G10_045.fcs	HEK293_PAClight2_G10_G10_045.fcs	PAClight2	P38	10	12896.6
HEK293_PAClight2_G10_G10_045.fcs	HEK293_PAClight2_G10_G10_045.fcs	PAClight2	P38	10	5109.12
HEK293_PAClight2_G10_G10_045.fcs	HEK293_PAClight2_G10_G10_045.fcs	PAClight2	P38	10	5880.96
HEK293_PAClight2_G10_G10_045.fcs	HEK293_PAClight2_G10_G10_045.fcs	PAClight2	P38	10	8449.92
HEK293_PAClight2_G10_G10_045.fcs	HEK293_PAClight2_G10_G10_045.fcs	PAClight2	P38	10	3718.08
HEK293_PAClight2_G10_G10_045.fcs	HEK293_PAClight2_G10_G10_045.fcs	PAClight2	P38	10	8084.16
HEK293_PAClight2_G10_G10_045.fcs	HEK293_PAClight2_G10_G10_045.fcs	PAClight2	P38	10	11723
HEK293_PAClight2_G10_G10_045.fcs	HEK293_PAClight2_G10_G10_045.fcs	PAClight2	P38	10	11786.4
HEK293_PAClight2_G10_G10_045.fcs	HEK293_PAClight2_G10_G10_045.fcs	PAClight2	P38	10	6984
HEK293_PAClight2_G10_G10_045.fcs	HEK293_PAClight2_G10_G10_045.fcs	PAClight2	P38	10	11437.9
HEK293_PAClight2_G10_G10_045.fcs	HEK293_PAClight2_G10_G10_045.fcs	PAClight2	P38	10	12248.6
HEK293_PAClight2_G10_G10_045.fcs	HEK293_PAClight2_G10_G10_045.fcs	PAClight2	P38	10	5480.64
HEK293_PAClight2_G10_G10_045.fcs	HEK293_PAClight2_G10_G10_045.fcs	PAClight2	P38	10	10297.4
HEK293_PAClight2_G10_G10_045.fcs	HEK293_PAClight2_G10_G10_045.fcs	PAClight2	P38	10	4242.24
HEK293_PAClight2_G10_G10_045.fcs	HEK293_PAClight2_G10_G10_045.fcs	PAClight2	P38	10	6835.68
HEK293_PAClight2_G10_G10_045.fcs	HEK293_PAClight2_G10_G10_045.fcs	PAClight2	P38	10	15605.3
HEK293_PAClight2_G10_G10_045.fcs	HEK293_PAClight2_G10_G10_045.fcs	PAClight2	P38	10	3087.36
HEK293_PAClight2_G10_G10_045.fcs	HEK293_PAClight2_G10_G10_045.fcs	PAClight2	P38	10	4433.76
HEK293_PAClight2_G10_G10_045.fcs	HEK293_PAClight2_G10_G10_045.fcs	PAClight2	P38	10	14738.4
HEK293_PAClight2_G10_G10_045.fcs	HEK293_PAClight2_G10_G10_045.fcs	PAClight2	P38	10	6708.96
HEK293_PAClight2_G10_G10_045.fcs	HEK293_PAClight2_G10_G10_045.fcs	PAClight2	P38	10	7364.16
HEK293_PAClight2_G10_G10_045.fcs	HEK293_PAClight2_G10_G10_045.fcs	PAClight2	P38	10	4736.16
HEK293_PAClight2_G10_G10_045.fcs	HEK293_PAClight2_G10_G10_045.fcs	PAClight2	P38	10	3119.04
HEK293_PAClight2_G10_G10_045.fcs	HEK293_PAClight2_G10_G10_045.fcs	PAClight2	P38	10	5646.24
HEK293_PAClight2_G10_G10_045.fcs	HEK293_PAClight2_G10_G10_045.fcs	PAClight2	P38	10	12555.4
HEK293_PAClight2_G10_G10_045.fcs	HEK293_PAClight2_G10_G10_045.fcs	PAClight2	P38	10	24458.4
HEK293_PAClight2_G10_G10_045.fcs	HEK293_PAClight2_G10_G10_045.fcs	PAClight2	P38	10	8781.12
HEK293_PAClight2_G10_G10_045.fcs	HEK293_PAClight2_G10_G10_045.fcs	PAClight2	P38	10	7970.4
HEK293_PAClight2_G10_G10_045.fcs	HEK293_PAClight2_G10_G10_045.fcs	PAClight2	P38	10	13887.4
HEK293_PAClight2_G10_G10_045.fcs	HEK293_PAClight2_G10_G10_045.fcs	PAClight2	P38	10	13680
HEK293_PAClight2_G10_G10_045.fcs	HEK293_PAClight2_G10_G10_045.fcs	PAClight2	P38	10	3299.04
HEK293_PAClight2_G10_G10_045.fcs	HEK293_PAClight2_G10_G10_045.fcs	PAClight2	P38	10	3565.44
HEK293_PAClight2_G10_G10_045.fcs	HEK293_PAClight2_G10_G10_045.fcs	PAClight2	P38	10	8663.04
HEK293_PAClight2_G10_G10_045.fcs	HEK293_PAClight2_G10_G10_045.fcs	PAClight2	P38	10	6562.08
HEK293_PAClight2_G10_G10_045.fcs	HEK293_PAClight2_G10_G10_045.fcs	PAClight2	P38	10	10690.6
HEK293_PAClight2_G10_G10_045.fcs	HEK293_PAClight2_G10_G10_045.fcs	PAClight2	P38	10	28766.9
HEK293_PAClight2_G10_G10_045.fcs	HEK293_PAClight2_G10_G10_045.fcs	PAClight2	P38	10	6809.76
HEK293_PAClight2_G10_G10_045.fcs	HEK293_PAClight2_G10_G10_045.fcs	PAClight2	P38	10	-36
HEK293_PAClight2_G10_G10_045.fcs	HEK293_PAClight2_G10_G10_045.fcs	PAClight2	P38	10	9313.92
HEK293_PAClight2_G10_G10_045.fcs	HEK293_PAClight2_G10_G10_045.fcs	PAClight2	P38	10	9973.44
HEK293_PAClight2_G10_G10_045.fcs	HEK293_PAClight2_G10_G10_045.fcs	PAClight2	P38	10	1324.8
HEK293_PAClight2_G10_G10_045.fcs	HEK293_PAClight2_G10_G10_045.fcs	PAClight2	P38	10	7660.8
HEK293_PAClight2_G10_G10_045.fcs	HEK293_PAClight2_G10_G10_045.fcs	PAClight2	P38	10	8883.36
HEK293_PAClight2_G10_G10_045.fcs	HEK293_PAClight2_G10_G10_045.fcs	PAClight2	P38	10	9289.44
HEK293_PAClight2_G10_G10_045.fcs	HEK293_PAClight2_G10_G10_045.fcs	PAClight2	P38	10	6552
HEK293_PAClight2_G10_G10_045.fcs	HEK293_PAClight2_G10_G10_045.fcs	PAClight2	P38	10	9046.08
HEK293_PAClight2_G10_G10_045.fcs	HEK293_PAClight2_G10_G10_045.fcs	PAClight2	P38	10	19219.7
HEK293_PAClight2_G10_G10_045.fcs	HEK293_PAClight2_G10_G10_045.fcs	PAClight2	P38	10	8809.92
HEK293_PAClight2_G10_G10_045.fcs	HEK293_PAClight2_G10_G10_045.fcs	PAClight2	P38	10	12883.7
HEK293_PAClight2_G10_G10_045.fcs	HEK293_PAClight2_G10_G10_045.fcs	PAClight2	P38	10	5342.4
HEK293_PAClight2_G10_G10_045.fcs	HEK293_PAClight2_G10_G10_045.fcs	PAClight2	P38	10	12329.3
HEK293_PAClight2_G10_G10_045.fcs	HEK293_PAClight2_G10_G10_045.fcs	PAClight2	P38	10	7428.96
HEK293_PAClight2_G10_G10_045.fcs	HEK293_PAClight2_G10_G10_045.fcs	PAClight2	P38	10	11904.5
HEK293_PAClight2_G10_G10_045.fcs	HEK293_PAClight2_G10_G10_045.fcs	PAClight2	P38	10	3185.28
HEK293_PAClight2_G10_G10_045.fcs	HEK293_PAClight2_G10_G10_045.fcs	PAClight2	P38	10	300.96
HEK293_PAClight2_G10_G10_045.fcs	HEK293_PAClight2_G10_G10_045.fcs	PAClight2	P38	10	12402.7
HEK293_PAClight2_G10_G10_045.fcs	HEK293_PAClight2_G10_G10_045.fcs	PAClight2	P38	10	1869.12
HEK293_PAClight2_G10_G10_045.fcs	HEK293_PAClight2_G10_G10_045.fcs	PAClight2	P38	10	5201.28
HEK293_PAClight2_G10_G10_045.fcs	HEK293_PAClight2_G10_G10_045.fcs	PAClight2	P38	10	8585.28
HEK293_PAClight2_G10_G10_045.fcs	HEK293_PAClight2_G10_G10_045.fcs	PAClight2	P38	10	5303.52
HEK293_PAClight2_G10_G10_045.fcs	HEK293_PAClight2_G10_G10_045.fcs	PAClight2	P38	10	13197.6
HEK293_PAClight2_G10_G10_045.fcs	HEK293_PAClight2_G10_G10_045.fcs	PAClight2	P38	10	10238.4
HEK293_PAClight2_G10_G10_045.fcs	HEK293_PAClight2_G10_G10_045.fcs	PAClight2	P38	10	4956.48
HEK293_PAClight2_G10_G10_045.fcs	HEK293_PAClight2_G10_G10_045.fcs	PAClight2	P38	10	8609.76
HEK293_PAClight2_G10_G10_045.fcs	HEK293_PAClight2_G10_G10_045.fcs	PAClight2	P38	10	40.32
HEK293_PAClight2_G10_G10_045.fcs	HEK293_PAClight2_G10_G10_045.fcs	PAClight2	P38	10	9930.24
HEK293_PAClight2_G10_G10_045.fcs	HEK293_PAClight2_G10_G10_045.fcs	PAClight2	P38	10	11102.4
HEK293_PAClight2_G10_G10_045.fcs	HEK293_PAClight2_G10_G10_045.fcs	PAClight2	P38	10	7230.24
HEK293_PAClight2_G10_G10_045.fcs	HEK293_PAClight2_G10_G10_045.fcs	PAClight2	P38	10	6806.88
HEK293_PAClight2_G10_G10_045.fcs	HEK293_PAClight2_G10_G10_045.fcs	PAClight2	P38	10	7960.32
HEK293_PAClight2_G10_G10_045.fcs	HEK293_PAClight2_G10_G10_045.fcs	PAClight2	P38	10	3620.16
HEK293_PAClight2_G10_G10_045.fcs	HEK293_PAClight2_G10_G10_045.fcs	PAClight2	P38	10	3542.4
HEK293_PAClight2_G10_G10_045.fcs	HEK293_PAClight2_G10_G10_045.fcs	PAClight2	P38	10	2931.84
HEK293_PAClight2_G10_G10_045.fcs	HEK293_PAClight2_G10_G10_045.fcs	PAClight2	P38	10	12777.1
HEK293_PAClight2_G10_G10_045.fcs	HEK293_PAClight2_G10_G10_045.fcs	PAClight2	P38	10	1700.64
HEK293_PAClight2_G10_G10_045.fcs	HEK293_PAClight2_G10_G10_045.fcs	PAClight2	P38	10	1895.04
HEK293_PAClight2_G10_G10_045.fcs	HEK293_PAClight2_G10_G10_045.fcs	PAClight2	P38	10	8612.64
HEK293_PAClight2_G10_G10_045.fcs	HEK293_PAClight2_G10_G10_045.fcs	PAClight2	P38	10	5525.28
HEK293_PAClight2_G10_G10_045.fcs	HEK293_PAClight2_G10_G10_045.fcs	PAClight2	P38	10	6197.76
HEK293_PAClight2_G10_G10_045.fcs	HEK293_PAClight2_G10_G10_045.fcs	PAClight2	P38	10	7990.56
HEK293_PAClight2_G10_G10_045.fcs	HEK293_PAClight2_G10_G10_045.fcs	PAClight2	P38	10	1368
HEK293_PAClight2_G10_G10_045.fcs	HEK293_PAClight2_G10_G10_045.fcs	PAClight2	P38	10	12458.9
HEK293_PAClight2_G10_G10_045.fcs	HEK293_PAClight2_G10_G10_045.fcs	PAClight2	P38	10	9097.92
HEK293_PAClight2_G10_G10_045.fcs	HEK293_PAClight2_G10_G10_045.fcs	PAClight2	P38	10	10867.7
HEK293_PAClight2_G10_G10_045.fcs	HEK293_PAClight2_G10_G10_045.fcs	PAClight2	P38	10	15652.8
HEK293_PAClight2_G10_G10_045.fcs	HEK293_PAClight2_G10_G10_045.fcs	PAClight2	P38	10	5133.6
HEK293_PAClight2_G10_G10_045.fcs	HEK293_PAClight2_G10_G10_045.fcs	PAClight2	P38	10	10445.8
HEK293_PAClight2_G10_G10_045.fcs	HEK293_PAClight2_G10_G10_045.fcs	PAClight2	P38	10	7987.68
HEK293_PAClight2_G10_G10_045.fcs	HEK293_PAClight2_G10_G10_045.fcs	PAClight2	P38	10	3996
HEK293_PAClight2_G10_G10_045.fcs	HEK293_PAClight2_G10_G10_045.fcs	PAClight2	P38	10	33572.2
HEK293_PAClight2_G10_G10_045.fcs	HEK293_PAClight2_G10_G10_045.fcs	PAClight2	P38	10	13016.2
HEK293_PAClight2_G10_G10_045.fcs	HEK293_PAClight2_G10_G10_045.fcs	PAClight2	P38	10	11630.9
HEK293_PAClight2_G10_G10_045.fcs	HEK293_PAClight2_G10_G10_045.fcs	PAClight2	P38	10	66664.8
HEK293_PAClight2_G10_G10_045.fcs	HEK293_PAClight2_G10_G10_045.fcs	PAClight2	P38	10	6946.56
HEK293_PAClight2_G10_G10_045.fcs	HEK293_PAClight2_G10_G10_045.fcs	PAClight2	P38	10	13214.9
HEK293_PAClight2_G10_G10_045.fcs	HEK293_PAClight2_G10_G10_045.fcs	PAClight2	P38	10	8383.68
HEK293_PAClight2_G10_G10_045.fcs	HEK293_PAClight2_G10_G10_045.fcs	PAClight2	P38	10	4227.84
HEK293_PAClight2_G10_G10_045.fcs	HEK293_PAClight2_G10_G10_045.fcs	PAClight2	P38	10	4678.56
[truncated: 598,847+ more rows]

## Sheet: d
Construct_Peptide	peptide	peptideConc	Conc_M	NormFITC_A
[truncated: 142 more rows]

## Sheet: transfectedPAClight1
.rownames	name	combined	group	well_col	peptideConc	FITC-A
[truncated: 550,000+ more rows]

[truncated: 1 more sheets: transfectedPAClight2]
