# Supplementary material for: Probing PAC1 receptor activation across species with an engineered sensor
Source: eLife. 2024 Aug 15;13:RP96496. doi: 10.7554/eLife.96496 (PMC11326774; doi:10.7554/eLife.96496)
Supplement: Figure 4—source data 1. [file elife-96496-fig4-data1.xlsx]

## Sheet: Figure 4d
PAClight1_P78A		each row is a slice, each value represents DF/F [%] starting at t=0 in column A
0nM
0.881132	0.922641	0.936619	0.987607	0.999712	1.09798	1.08229	1.19424	1.38248	1.43955	1.51273	1.64625	1.60801	1.48777	1.45275	1.39894	1.36409	1.45213	1.49272	1.51055	1.54088	1.64739	1.61758	1.70493	1.85617	1.84894	1.67277	1.77177	1.67846	1.62282	1.71058	1.92416	1.85496	1.96339	2.01245	2.02513	1.96865	2.01532	2.01955	2.01025	2.06188	2.03841	1.99701	1.8592	1.76628	1.65487	1.69182	1.67257	1.76406	1.73244
11.2037	11.0322	10.909	10.7041	10.4067	10.1741	10.0329	9.93106	9.8107	9.70824	9.51523	9.36871	9.26792	9.11313	9.03394	9.04134	9.01368	9.02674	9.10704	9.20106	9.18585	9.20574	9.0267	8.89322	8.75158	8.79501	8.7437	8.83899	8.88485	8.95535	8.92611	8.91558	8.82775	8.80112	8.77731	8.81103	8.75785	8.75937	8.67298	8.60995	8.47889	8.52374	8.44544	8.48465	8.53594	8.58045	8.57977	8.53858	8.54967	8.49242
1.58169	1.61888	1.66292	1.69428	1.7717	1.81053	1.85088	1.84896	1.92849	1.95801	2.03373	2.08471	2.15652	2.18127	2.20974	2.18822	2.18615	2.20459	2.17823	2.16964	2.16196	2.13057	2.12027	2.15013	2.13211	2.16916	2.23205	2.21718	2.18199	2.20824	2.19379	2.1667	2.16899	2.15956	2.11599	2.07904	2.0292	2.00715	1.96444	1.96185	1.95882	1.91707	1.88815	1.89509	1.82869	1.78534	1.82876	1.80095	1.80021	1.82835
3.19583	3.10803	3.0025	2.86701	2.77115	2.70804	2.63317	2.64294	2.4576	2.44028	2.44532	2.35488	2.32034	2.38311	2.3012	2.24529	2.28924	2.18782	2.2769	2.29411	2.3246	2.34797	2.40632	2.37487	2.3478	2.30085	2.32197	2.34959	2.30675	2.33694	2.39819	2.3344	2.31659	2.37633	2.34438	2.32837	2.38484	2.45259	2.34651	2.38354	2.37881	2.40313	2.2921	2.362	2.33749	2.36008	2.37571	2.36533	2.37308	2.40783
0.266168	0.208114	0.0975815	-0.0303936	-0.173185	-0.199381	-0.216286	-0.170987	-0.0818053	0.0223679	0.00787717	-0.00143786	0.0280915	-0.00602013	-0.0279051	-0.0588139	-0.051164	-0.135399	-0.119724	-0.151788	-0.161919	-0.190183	-0.1469	-0.249717	-0.287148	-0.355443	-0.470986	-0.503222	-0.504172	-0.549221	-0.678438	-0.573937	-0.545343	-0.519602	-0.491846	-0.336742	-0.443523	-0.424684	-0.330306	-0.314506	-0.328137	-0.338924	-0.410882	-0.590182	-0.62082	-0.625142	-0.521034	-0.51479	-0.432695	-0.45335
1.02126	1.05868	0.934026	0.804814	0.780947	0.723334	0.643122	0.687267	0.677103	0.574607	0.633065	0.58507	0.574588	0.596532	0.695956	0.630254	0.715693	0.794774	0.863899	0.879688	0.97531	0.970287	0.889408	0.787131	0.714444	0.58738	0.560461	0.42971	0.452981	0.307723	0.251728	0.187569	0.13446	0.00835458	-0.0255276	0.0116185	-0.138249	-0.113274	-0.0675795	0.00508064	-0.0856227	-0.087242	-0.0350416	-0.0451095	-0.103019	-0.0198097	0.0705458	0.0388962	-0.0951032	-0.0565744
30nM
0.921073	1.00684	0.975647	0.902598	0.869693	0.85553	0.781687	0.723798	0.75764	0.726976	0.575989	0.515528	0.470577	0.421012	0.390495	0.370665	0.281484	0.332958	0.328319	0.369486	0.408273	0.441417	0.337832	0.26363	0.22323	0.172501	0.113955	0.112888	-0.00938946	-0.0394646	-0.0850485	-0.140425	-0.196126	-0.0612311	-0.122542	-0.139202	-0.144388	-0.102358	-0.247113	-0.310977	-0.408649	-0.350898	-0.419474	-0.299409	-0.23352	-0.182763	-0.170922	-0.191498	-0.377168	-0.436141
1.64197	1.60161	1.61102	1.45974	1.38481	1.41535	1.3876	1.26927	1.25923	1.17526	1.10805	1.00889	1.01665	1.00121	1.14516	1.23409	1.25787	1.29572	1.36803	1.27197	1.10082	1.03847	1.02505	0.863806	0.703753	0.714508	0.684939	0.534486	0.504473	0.682062	0.648869	0.763021	0.939493	1.09078	1.10563	1.23093	1.27465	1.21623	1.20503	1.22928	1.14015	1.1364	1.09659	1.02194	0.967346	1.02703	0.937196	1.04379	1.15667	1.17691
0.0734625	0.130334	0.130004	0.262776	0.336894	0.31226	0.36373	0.365386	0.440382	0.461642	0.588004	0.665883	0.80717	0.852404	0.897052	1.00266	0.955374	1.02075	0.90512	0.904161	0.878079	0.991596	0.932503	0.952291	0.925157	0.874576	0.826369	0.782625	0.871517	0.935002	0.962673	0.930474	0.999327	0.979968	0.928495	0.940967	0.981632	0.952768	0.900427	0.979788	0.972899	0.875258	0.894525	0.99203	0.965648	0.960041	1.04939	1.07837	1.04233	1.01787
0.821821	0.814764	0.756249	0.699014	0.630627	0.55504	0.497238	0.473075	0.469523	0.371655	0.379631	0.338381	0.276063	0.233304	0.19482	0.165382	0.0950787	0.155486	0.167983	0.222067	0.203532	0.267573	0.215848	0.272121	0.272297	0.227817	0.225036	0.209302	0.206968	0.17404	0.132134	0.093779	0.203001	0.13585	0.182986	0.272211	0.359604	0.352809	0.432902	0.402765	0.322944	0.207232	0.146209	0.0576621	0.124998	0.140151	0.124342	0.109787	0.111078	0.114538
0.0602534	0.0614544	-0.0110165	-0.0482349	-0.196986	-0.224618	-0.252985	-0.318913	-0.313464	-0.212011	-0.363391	-0.492926	-0.440099	-0.422059	-0.566531	-0.441653	-0.276916	-0.312015	-0.33919	-0.193034	-0.218188	-0.341244	-0.338736	-0.27392	-0.416344	-0.454367	-0.477489	-0.440267	-0.496536	-0.40042	-0.413336	-0.2995	-0.365578	-0.333267	-0.335602	-0.30527	-0.341165	-0.270307	-0.220779	-0.239733	-0.253117	-0.217911	-0.187398	-0.313649	-0.270127	-0.268889	-0.403299	-0.408053	-0.308867	-0.267359
0.444124	0.316727	0.305405	0.312107	0.373197	0.384156	0.474658	0.383007	0.242854	0.185009	0.137698	0.0502803	0.0334816	0.137048	0.156929	0.195643	0.282277	0.297474	0.258201	0.193493	0.121003	0.0682727	0.102841	0.146787	0.226154	0.2784	0.332247	0.308944	0.256844	0.259443	0.307345	0.298791	0.463451	0.455338	0.43856	0.429098	0.447165	0.373499	0.42432	0.468132	0.470384	0.458193	0.526066	0.549521	0.578175	0.572207	0.499568	0.487403	0.443944	0.442896
300nM
0.670881	0.664459	0.630035	0.667466	0.567992	0.615714	0.651489	0.679937	0.609505	0.643339	0.719761	0.69512	0.733497	0.849233	0.957469	0.965377	0.988679	0.988735	1.0004	0.951965	0.93227	0.969021	1.0724	1.00612	1.05554	1.01919	1.02645	0.948503	1.07292	1.09574	1.1351	1.13598	1.14914	1.0828	1.02351	1.04044	1.07682	1.14786	1.19792	1.18115	1.15226	1.15701	1.20267	1.19418	1.35882	1.44725	1.44374	1.47205	1.50547	1.49119
0.205306	0.265127	0.312116	0.360534	0.479938	0.509897	0.616249	0.730808	0.791555	0.861292	0.96934	0.896046	0.926079	1.01987	1.07323	1.14641	1.24499	1.24679	1.20516	1.206	1.09212	1.11227	1.14943	1.27106	1.28404	1.40427	1.40939	1.4088	1.39536	1.46797	1.43608	1.46912	1.51637	1.47215	1.38984	1.41677	1.46768	1.36951	1.48244	1.57878	1.68939	1.6699	1.76852	1.69961	1.68063	1.51618	1.48861	1.32988	1.2849	1.20037
1.8611	1.86149	1.94403	2.04752	2.07658	2.04848	2.13055	2.14825	2.0494	2.12447	2.24761	2.25762	2.29768	2.35184	2.29594	2.28601	2.3429	2.33318	2.44923	2.47321	2.4542	2.3223	2.28252	2.29401	2.40034	2.39467	2.39051	2.43869	2.35525	2.29467	2.19056	2.36101	2.37806	2.32405	2.31637	2.45036	2.34955	2.20797	2.24499	2.22423	2.13269	2.11444	2.17328	2.14326	2.1739	2.13775	2.09728	2.11509	2.07518	1.99221
0.205306	0.265127	0.312116	0.360534	0.479938	0.509897	0.616249	0.730808	0.791555	0.861292	0.96934	0.896046	0.926079	1.01987	1.07323	1.14641	1.24499	1.24679	1.20516	1.206	1.09212	1.11227	1.14943	1.27106	1.28404	1.40427	1.40939	1.4088	1.39536	1.46797	1.43608	1.46912	1.51637	1.47215	1.38984	1.41677	1.46768	1.36951	1.48244	1.57878	1.68939	1.6699	1.76852	1.69961	1.68063	1.51618	1.48861	1.32988	1.2849	1.20037
0.514899	0.541867	0.477302	0.42539	0.247442	0.146619	0.0871853	0.0586083	0.0106588	-0.0215113	0.0158576	-0.148875	-0.166659	-0.133881	-0.101245	-0.186821	-0.191138	-0.255945	-0.360474	-0.4679	-0.40052	-0.321194	-0.28242	-0.207094	-0.176287	-0.19768	-0.311063	-0.446553	-0.547206	-0.53308	-0.644382	-0.677671	-0.558651	-0.447173	-0.508444	-0.425427	-0.430946	-0.476823	-0.586334	-0.542947	-0.665452	-0.743395	-0.795121	-0.828921	-0.842736	-0.786132	-0.676603	-0.747018	-0.792772	-0.847531
-2.58403	-2.54346	-2.50528	-2.58635	-2.73147	-2.7155	-2.75913	-2.91324	-2.83757	-2.69827	-2.81088	-2.93271	-2.8156	-2.78271	-2.86763	-2.81989	-2.76773	-2.79518	-2.8221	-2.83677	-2.91865	-2.87468	-2.90649	-2.95214	-2.89643	-2.79442	-2.91532	-2.9251	-2.94721	-2.94725	-2.97209	-2.85418	-2.84725	-2.81197	-2.83944	-2.82734	-2.81668	-2.78693	-2.81175	-2.88601	-3.03488	-3.16261	-3.23135	-3.26764	-3.156	-3.04499	-3.0116	-3.0804	-3.07753	-3.18548
3000nM
1.58077	1.53628	1.54583	1.40639	1.24864	1.15885	1.11604	1.07381	1.10283	1.10897	1.16864	1.1519	1.17023	1.12552	1.16814	1.13755	1.1661	1.10671	1.06458	1.07183	1.08768	1.108	1.09048	1.19713	1.12451	1.13172	1.02814	1.02665	1.05117	1.16856	1.16413	1.23768	1.26859	1.17733	1.12101	1.08641	1.02421	0.908476	0.938752	0.964202	0.97136	1.05339	1.13201	1.13376	1.11097	1.10428	0.930577	0.913312	0.836622	0.788922
2.12334	2.02513	2.04404	2.0101	1.93899	1.78644	1.81449	1.78344	1.72158	1.65396	1.68851	1.59666	1.54714	1.60172	1.63604	1.64363	1.6036	1.57744	1.43659	1.38282	1.35194	1.44252	1.39945	1.45374	1.42441	1.36312	1.21121	1.1431	1.00417	0.978009	0.997476	1.02857	1.07028	1.13475	1.01804	0.94368	0.879892	0.802783	0.698235	0.758208	0.792819	0.819678	0.750413	0.746039	0.730915	0.671965	0.630295	0.67743	0.754878	0.770594
1.14615	1.11096	1.11219	1.10428	1.16286	1.12679	1.16001	1.13742	1.05481	1.0434	1.01505	0.984005	0.9591	0.899366	0.844617	0.701243	0.672855	0.660651	0.702985	0.568101	0.709036	0.668474	0.619211	0.552481	0.637668	0.561869	0.499687	0.49934	0.424877	0.376026	0.242203	0.187261	0.144837	0.128593	0.158185	0.298136	0.345537	0.256549	0.337985	0.32087	0.236484	0.258728	0.319743	0.301225	0.316438	0.27958	0.188309	0.235181	0.190188	0.0985319
2.55358	2.52864	2.53297	2.424	2.39274	2.39454	2.42916	2.33619	2.35698	2.39135	2.41255	2.27923	2.32321	2.298	2.11111	2.07621	2.05518	2.02413	1.95763	1.98737	1.9621	1.9284	1.79374	1.72776	1.68914	1.60122	1.57982	1.60871	1.62023	1.57577	1.57497	1.57545	1.58694	1.60276	1.68555	1.78747	1.7959	1.8721	1.8959	1.88365	1.84838	1.92375	1.88963	1.8986	1.88963	1.91033	1.87871	1.88679	1.83244	1.84708
0.0163506	-0.0130589	-0.028041	-0.0537148	-0.12048	-0.118004	-0.120744	-0.204516	-0.288512	-0.258924	-0.348093	-0.368528	-0.269138	-0.273561	-0.277791	-0.230786	-0.291839	-0.354572	-0.280387	-0.336986	-0.365182	-0.284974	-0.252931	-0.352395	-0.422602	-0.531301	-0.563506	-0.617377	-0.505497	-0.349305	-0.234376	-0.252886	-0.33637	-0.457473	-0.452936	-0.56837	-0.526874	-0.360933	-0.348758	-0.381627	-0.273078	-0.393971	-0.479947	-0.502159	-0.528877	-0.535123	-0.494358	-0.501193	-0.37975	-0.36515
-0.0975252	-0.0244612	-0.0667116	-0.0242105	-0.0514683	-0.126714	-0.31157	-0.291395	-0.236555	-0.210543	-0.233546	-0.116092	-0.0993307	-0.144079	-0.215813	-0.205443	-0.230862	-0.27782	-0.301809	-0.286942	-0.261742	-0.23956	-0.175582	-0.137931	-0.137766	-0.218527	-0.191453	-0.245344	-0.343267	-0.362194	-0.262839	-0.300986	-0.373949	-0.345701	-0.25883	-0.219737	-0.215411	-0.167244	-0.121479	-0.217294	-0.262128	-0.306082	-0.403959	-0.439631	-0.491351	-0.463464	-0.40248	-0.314031	-0.269079	-0.150507
PAClight1-ctrl
0nM
-2.4346	-2.5762	-2.66827	-2.83668	-2.99903	-3.15663	-3.13489	-3.10626	-3.01348	-3.00266	-2.95189	-2.97034	-2.92724	-2.9203	-2.80577	-2.77762	-2.80008	-2.826	-2.96839	-3.07391	-3.04056	-2.96975	-2.91802	-2.76704	-2.63829	-2.60034	-2.51895	-2.49931	-2.52835	-2.51112	-2.47472	-2.50237	-2.56466	-2.55857	-2.60227	-2.71223	-2.7522	-2.75842	-2.7761	-2.73645	-2.82677	-2.85898	-2.90371	-2.93713	-2.95927	-2.83888	-2.84377	-2.78985	-2.79707	-2.8911
-4.50154	-4.47744	-4.50995	-4.5458	-4.48996	-4.34435	-4.26814	-4.15467	-4.05257	-4.03068	-4.06652	-4.20772	-4.26296	-4.28121	-4.25736	-4.20129	-4.01641	-3.96527	-3.87773	-3.89665	-3.94865	-3.98187	-3.92559	-3.98528	-3.95644	-3.99824	-3.95448	-3.96838	-4.02914	-4.08922	-4.10318	-4.1402	-4.08619	-3.96385	-3.89113	-3.91146	-3.97051	-3.99352	-3.97546	-3.98374	-3.86294	-3.75315	-3.72498	-3.72864	-3.64011	-3.62574	-3.6222	-3.68769	-3.71454	-3.69023
0.750764	0.700876	0.774474	0.859813	0.87791	0.892493	0.997034	0.805171	0.716092	0.622609	0.519528	0.297646	0.395581	0.382128	0.356733	0.356301	0.478121	0.442703	0.439916	0.443286	0.49877	0.471605	0.471529	0.517196	0.583231	0.56434	0.585521	0.596291	0.469502	0.415567	0.357743	0.276029	0.323042	0.405258	0.464655	0.574864	0.701026	0.60491	0.6101	0.699445	0.678635	0.688586	0.785193	0.819759	0.790265	0.82074	0.786502	0.744733	0.761988	0.775411
-0.843005	-0.813691	-0.855116	-0.848922	-0.818169	-0.741887	-0.737653	-0.66516	-0.634236	-0.557655	-0.588552	-0.47882	-0.410548	-0.368989	-0.345681	-0.239104	-0.364441	-0.391455	-0.423249	-0.324134	-0.380531	-0.338203	-0.281852	-0.292622	-0.366031	-0.301064	-0.209319	-0.19538	-0.106653	-0.0526759	-0.0512092	-0.0970071	-0.0316414	-0.0766196	-0.19309	-0.208808	-0.0917911	-0.129379	-0.13096	-0.0084304	0.0318545	0.0221543	-0.00501192	0.100005	0.117383	0.0890043	-0.00246281	-0.0269636	-0.0436481	-0.0574736
-1.90707	-1.72747	-1.60226	-1.44107	-1.22148	-1.15307	-1.18227	-1.23361	-1.2324	-1.31442	-1.26921	-1.22272	-1.20535	-1.24099	-1.19575	-1.14329	-1.09692	-1.00231	-0.955069	-0.938834	-0.867551	-0.850393	-0.83715	-0.799219	-0.784245	-0.807129	-0.82293	-0.838944	-0.787126	-0.700777	-0.694273	-0.585433	-0.57927	-0.565726	-0.663999	-0.632449	-0.663411	-0.572179	-0.586176	-0.428374	-0.408052	-0.391518	-0.45217	-0.384913	-0.41904	-0.403464	-0.456994	-0.488547	-0.492781	-0.479666
0.970775	0.960688	0.931799	0.947791	0.915832	0.861483	0.786337	0.828792	0.784532	0.74775	0.789288	0.812855	0.734899	0.812856	0.767811	0.794106	0.862607	0.900775	0.79784	0.865391	0.85775	0.850412	0.853635	0.856298	0.82789	0.755022	0.579888	0.577687	0.582494	0.627775	0.707826	0.890733	0.902742	0.823233	0.801223	0.745834	0.685932	0.621379	0.670442	0.592742	0.502829	0.404971	0.379647	0.399377	0.436234	0.531014	0.645406	0.575326	0.420341	0.377842
-2.19712	-2.22076	-2.22855	-2.37694	-2.37054	-2.36536	-2.49831	-2.61322	-2.6065	-2.68799	-2.68896	-2.67911	-2.65812	-2.72391	-2.72612	-2.80775	-2.74318	-2.74979	-2.72071	-2.81722	-2.85422	-2.88408	-2.87244	-2.93684	-2.8703	-2.87776	-2.8587	-2.88229	-2.80034	-2.81221	-2.76303	-2.82425	-2.84045	-2.82448	-2.80466	-2.79159	-2.78026	-2.7011	-2.69948	-2.64569	-2.60727	-2.6044	-2.62772	-2.76602	-2.79906	-2.80233	-2.72814	-2.70437	-2.58012	-2.64136
300nM
5.2891	5.23809	5.17096	5.0889	5.04321	5.03401	4.98991	5.00411	5.11248	5.17202	5.08018	5.06075	5.07061	5.04392	5.0286	5.10092	5.16954	5.20667	5.21431	5.16051	5.1678	5.13248	5.15097	5.05079	5.05925	5.03552	5.09449	5.11531	5.19256	5.21305	5.21338	5.25151	5.17447	5.2269	5.28953	5.28289	5.23245	5.2924	5.25032	5.22834	5.32831	5.4282	5.43138	5.48844	5.42602	5.38081	5.36703	5.4109	5.42337	5.49775
1.17233	1.11356	0.969924	0.849127	0.884487	0.696655	0.696428	0.672826	0.611276	0.559507	0.627527	0.565894	0.636169	0.583861	0.632212	0.625827	0.635913	0.556543	0.582137	0.511534	0.370836	0.320861	0.433361	0.449794	0.419495	0.529003	0.588408	0.510388	0.458724	0.362004	0.367147	0.338961	0.294712	0.297699	0.502587	0.540647	0.572283	0.716025	0.714389	0.652819	0.576839	0.517293	0.430256	0.562108	0.539287	0.591222	0.60156	0.589909	0.468128	0.520624
0.274239	0.175852	0.105215	0.0924168	0.104949	0.0659711	0.160009	0.252689	0.258579	0.260724	0.28533	0.266329	0.25073	0.186752	0.0514079	-0.0514742	-0.126958	-0.149054	-0.109575	0.0160749	0.0757129	0.162461	0.193312	0.170683	0.143189	0.134274	0.135315	0.10501	0.0483677	0.0946739	0.137544	0.0698161	0.0855506	0.189027	0.217293	0.231057	0.270335	0.265502	0.236329	0.194207	0.179073	0.165244	0.196024	0.251314	0.221937	0.237875	0.237257	0.270133	0.262362	0.303822
3.97132	3.86556	3.82829	3.77954	3.84676	3.81412	3.87682	3.90863	3.81965	3.75817	3.71373	3.65613	3.62014	3.62461	3.63961	3.6349	3.65031	3.60539	3.52376	3.48756	3.35669	3.22153	3.23551	3.37062	3.35068	3.42349	3.53337	3.51733	3.36693	3.41044	3.48255	3.51859	3.57054	3.69274	3.67129	3.62875	3.56087	3.55166	3.51137	3.4033	3.45652	3.51208	3.49751	3.44901	3.48674	3.40172	3.34055	3.30906	3.39203	3.42435
0.71379	0.727858	0.776531	0.709543	0.676098	0.674275	0.535665	0.355814	0.257533	0.176882	0.0960115	0.142135	0.120056	0.160163	0.165558	0.230707	0.190294	0.102385	-0.0761081	-0.127614	-0.237129	-0.315688	-0.263864	-0.250128	-0.284104	-0.334152	-0.312893	-0.332451	-0.396598	-0.433846	-0.435192	-0.534639	-0.555564	-0.530248	-0.490715	-0.445771	-0.407994	-0.376946	-0.334175	-0.379867	-0.36532	-0.342106	-0.378354	-0.383768	-0.302117	-0.388154	-0.384045	-0.361356	-0.285399	-0.359889
-1.09094	-1.02145	-0.925745	-0.826242	-0.648785	-0.540064	-0.435274	-0.417064	-0.242516	-0.278764	-0.205829	-0.0967423	-0.0383637	-0.0933379	0.0295426	0.0583838	-0.0113499	0.0753137	0.0637402	0.0550771	0.026409	-0.000517262	-0.0385257	-0.0537668	-0.0566198	-0.0117317	0.0215607	0.0653608	0.0830146	0.0693071	0.0508153	0.0760315	0.0569899	0.0685725	0.0884781	-0.00675869	-0.0216875	-0.130056	-0.124025	-0.163052	-0.0769688	-0.0733309	-0.0460898	-0.057141	-0.0460684	-0.0432552	-0.153026	-0.0969364	-0.0599129	-0.0884791
3000nM
-0.576742	-0.596413	-0.636156	-0.682846	-0.79658	-0.891767	-0.940264	-0.982874	-0.939387	-0.931846	-0.865696	-0.899231	-0.920056	-1.08315	-1.05086	-1.12163	-1.08812	-1.09174	-0.9542	-0.996834	-0.997557	-1.12905	-1.10502	-1.12773	-1.09684	-1.08228	-0.931131	-1.04269	-1.15113	-1.18683	-1.22459	-1.29914	-1.18834	-1.08757	-1.17265	-1.2242	-1.26968	-1.35439	-1.43427	-1.47722	-1.44243	-1.38595	-1.32662	-1.28099	-1.19035	-1.22232	-1.26458	-1.3551	-1.42996	-1.44603
1.76311	1.78006	1.83933	1.89639	1.85111	1.88312	1.94672	1.91929	1.94164	2.06825	2.0289	1.9771	1.93578	1.94252	1.83623	1.83435	1.86338	2.00022	2.05591	2.21786	2.27566	2.32436	2.33867	2.25825	2.09868	2.07891	2.05483	1.94471	1.9721	2.08112	2.12065	2.07356	2.11885	2.07765	1.97588	1.88292	1.90344	1.85382	1.86583	2.0029	2.01027	1.96251	2.02692	2.05823	1.98762	2.0496	2.05583	1.96977	1.92374	1.85684
1.7895	1.68629	1.54303	1.29194	1.11722	1.05891	0.931594	0.877335	0.857191	0.818551	0.747242	0.719612	0.650021	0.559573	0.521197	0.512993	0.433971	0.466723	0.411879	0.332816	0.240524	0.212629	0.187295	0.176212	0.141665	0.0790364	0.103629	0.0390943	-0.00788757	-0.0103553	-0.0110422	-0.0860799	-0.134941	-0.154936	-0.24429	-0.244424	-0.232791	-0.276494	-0.287468	-0.270846	-0.305525	-0.378458	-0.41881	-0.414249	-0.444028	-0.398485	-0.377298	-0.310548	-0.29246	-0.319129
2.17596	2.04103	2.01507	1.85908	1.89035	1.76426	1.64737	1.57833	1.50424	1.47879	1.54474	1.69377	1.74254	1.84873	1.82647	1.74967	1.64351	1.48209	1.38398	1.32725	1.31226	1.25183	1.18167	1.13515	1.13875	1.10762	1.12626	1.23706	1.23352	1.21994	1.25843	1.3632	1.40766	1.52092	1.60597	1.58336	1.50715	1.53823	1.53325	1.48549	1.54737	1.65702	1.73423	1.77312	1.88908	1.95516	2.06213	1.96077	2.06849	2.07117
-2.16295	-2.06889	-1.90738	-1.67513	-1.48434	-1.29025	-1.18301	-1.16197	-1.12405	-1.21229	-1.20096	-1.19643	-1.10984	-1.08739	-0.958207	-0.952054	-0.965947	-0.980848	-0.964732	-0.911011	-0.764937	-0.664848	-0.635864	-0.61244	-0.616904	-0.58823	-0.465135	-0.342534	-0.289477	-0.227735	-0.211439	-0.198945	-0.270542	-0.264746	-0.268235	-0.232724	-0.23343	-0.134154	-0.0397661	-0.0522669	-0.0441595	-0.0871323	-0.220831	-0.309254	-0.315358	-0.455812	-0.499864	-0.494969	-0.487568	-0.526816
4.50657	4.3487	4.12835	3.8133	3.36503	3.06853	2.73133	2.42668	2.12017	1.89133	1.64993	1.39768	1.15126	1.0394	0.931495	0.762526	0.753641	0.787556	0.747997	0.691438	0.728975	0.615211	0.590621	0.553028	0.439934	0.40865	0.370608	0.220601	0.0848814	0.0136997	-0.108295	-0.118993	-0.049368	-0.056753	-0.0305689	0.0207373	-0.0409821	-0.0789258	-0.0753324	-0.0560156	-0.122485	-0.14985	-0.183629	-0.249088	-0.277949	-0.276895	-0.293531	-0.301362	-0.347612	-0.348146
[truncated: 4,750 more columns]

## Sheet: Figure 4e
PAClight1P78A DeltaF/F[%] responses to the following peptides, each row respresents a slice:
VIP
1.59373	1.43465	1.3804	1.28638	1.28268	1.23907	1.33713	1.38499	1.34845	1.29367	1.21504	1.17871	1.10817	1.01523	0.97291	1.00115	0.973627	0.923811	0.937075	0.81799	0.77715	0.774434	0.872444	0.93165	1.03732	1.12264	1.08625	1.01635	1.02014	1.0074	0.962128	0.988228	0.975703	0.879796	0.835512	0.832575	0.738417	0.738256	0.828309	0.806793	0.792114	0.823174	0.799035	0.818889	0.89842	0.831753	0.899543	0.929862	0.888159	0.835157
0.911998	0.769398	0.732402	0.573838	0.407222	0.3939	0.355106	0.295052	0.211511	0.126691	0.058886	0.00461604	-0.0230233	-0.0151497	-0.0263794	-0.0281529	0.0306548	0.051307	0.0308956	0.123141	0.13706	0.074964	0.0601833	0.0876131	0.0207949	0.0172342	-0.0482396	-0.133647	-0.160231	-0.185905	-0.289878	-0.303256	-0.301173	-0.26687	-0.257541	-0.172501	-0.104854	-0.181819	-0.286249	-0.238479	-0.263815	-0.253481	-0.15991	-0.0642569	-0.0847524	-0.0586584	-0.0567106	-0.0250637	0.00863195	0.0133773
-1.24346	-1.11029	-1.03164	-0.858423	-0.734737	-0.583571	-0.522	-0.41543	-0.364159	-0.319447	-0.38836	-0.383942	-0.327994	-0.321858	-0.287038	-0.119316	-0.0020069	0.0136562	0.0522796	0.131099	0.0587527	0.0820408	0.146222	0.153846	0.168466	0.322808	0.328906	0.254754	0.347293	0.355228	0.215755	0.0677674	0.14761	0.0842203	0.150954	0.301832	0.485625	0.544418	0.672616	0.566434	0.595445	0.621014	0.562104	0.579003	0.680181	0.654505	0.502677	0.506081	0.474588	0.398307
CRF
1.20544	1.18595	1.23403	1.2036	1.25538	1.21737	1.26524	1.1889	1.18174	1.09306	0.943633	0.894952	0.809027	0.665915	0.627129	0.714429	0.654648	0.675638	0.643628	0.622913	0.511102	0.448105	0.447277	0.537932	0.557892	0.508995	0.53317	0.500818	0.487847	0.448811	0.394199	0.360234	0.263348	0.216979	0.165464	0.316593	0.302257	0.300899	0.261871	0.277385	0.217518	0.172706	0.18227	0.211331	0.223546	0.153946	0.141584	0.0234685	-0.0491712	-0.19054
-0.889965	-0.902953	-0.877891	-0.810139	-0.743896	-0.775864	-0.846465	-0.891761	-1.03078	-1.07016	-1.11842	-1.1224	-1.22951	-1.1931	-1.26249	-1.23925	-1.1529	-1.12905	-1.11417	-1.08351	-1.17606	-1.19985	-1.12971	-1.1897	-1.26774	-1.21056	-1.25549	-1.31657	-1.29044	-1.29976	-1.29492	-1.33581	-1.28173	-1.22863	-1.16269	-1.16252	-1.10276	-1.25662	-1.27829	-1.23039	-1.24913	-1.24596	-1.18401	-1.11652	-1.12654	-1.13205	-1.16982	-1.08104	-1.2084	-1.19642
1.0979	1.12278	1.09848	1.08459	0.917549	0.916044	0.920854	0.910667	0.955108	1.08392	1.05032	0.999242	1.06523	1.04141	1.0661	1.05175	1.08827	1.09643	1.15593	1.18962	1.27814	1.29095	1.21612	1.22658	1.19848	1.15311	1.1435	1.20315	1.11089	1.07291	1.07429	1.0837	1.03227	1.12107	1.15389	1.14509	1.15304	1.13749	1.04544	0.946884	0.926795	0.858459	0.85555	0.913098	0.953552	0.898439	0.941236	0.897937	0.803314	0.859293
Enkephalin
0.446571	0.346725	0.32233	0.26995	0.244644	0.261202	0.359128	0.408964	0.453138	0.396641	0.42953	0.393741	0.317239	0.326254	0.424617	0.47585	0.55247	0.581847	0.665715	0.666499	0.59682	0.516618	0.595576	0.528323	0.447575	0.48071	0.588947	0.640863	0.672758	0.758863	0.716327	0.68014	0.684839	0.648136	0.67413	0.73513	0.771343	0.734665	0.796474	0.789594	0.832122	0.823776	0.869109	0.856518	0.794218	0.719531	0.703231	0.679038	0.65211	0.735771
-0.239922	-0.184914	-0.200126	-0.392083	-0.454953	-0.402787	-0.463322	-0.435988	-0.371324	-0.405768	-0.427333	-0.448649	-0.477911	-0.412778	-0.375473	-0.358762	-0.315202	-0.320013	-0.38803	-0.342305	-0.331299	-0.403875	-0.515331	-0.472899	-0.532989	-0.568045	-0.622669	-0.518268	-0.456167	-0.425066	-0.408042	-0.3577	-0.297895	-0.349839	-0.38188	-0.393493	-0.366856	-0.395888	-0.509205	-0.53988	-0.460453	-0.402611	-0.398314	-0.262975	-0.231317	-0.250745	-0.324776	-0.354401	-0.360785	-0.33564
1.55588	1.4826	1.49696	1.41345	1.45775	1.41137	1.43934	1.41749	1.38184	1.39908	1.41905	1.39135	1.33242	1.2473	1.18101	1.17173	1.16699	1.17497	1.24808	1.25409	1.22514	1.18218	1.20996	1.16262	1.12289	1.12758	1.10706	1.00226	1.0097	1.01326	1.00339	1.07424	1.11501	1.11131	1.12836	1.07717	0.963204	0.958355	0.882081	0.808834	0.811218	0.916413	0.965792	1.08499	1.16432	1.21209	1.18609	1.18354	1.10639	1.05866
PACAP
1.58077	1.53628	1.54583	1.40639	1.24864	1.15885	1.11604	1.07381	1.10283	1.10897	1.16864	1.1519	1.17023	1.12552	1.16814	1.13755	1.1661	1.10671	1.06458	1.07183	1.08768	1.108	1.09048	1.19713	1.12451	1.13172	1.02814	1.02665	1.05117	1.16856	1.16413	1.23768	1.26859	1.17733	1.12101	1.08641	1.02421	0.908476	0.938752	0.964202	0.97136	1.05339	1.13201	1.13376	1.11097	1.10428	0.930577	0.913312	0.836622	0.788922
2.12334	2.02513	2.04404	2.0101	1.93899	1.78644	1.81449	1.78344	1.72158	1.65396	1.68851	1.59666	1.54714	1.60172	1.63604	1.64363	1.6036	1.57744	1.43659	1.38282	1.35194	1.44252	1.39945	1.45374	1.42441	1.36312	1.21121	1.1431	1.00417	0.978009	0.997476	1.02857	1.07028	1.13475	1.01804	0.94368	0.879892	0.802783	0.698235	0.758208	0.792819	0.819678	0.750413	0.746039	0.730915	0.671965	0.630295	0.67743	0.754878	0.770594
1.14615	1.11096	1.11219	1.10428	1.16286	1.12679	1.16001	1.13742	1.05481	1.0434	1.01505	0.984005	0.9591	0.899366	0.844617	0.701243	0.672855	0.660651	0.702985	0.568101	0.709036	0.668474	0.619211	0.552481	0.637668	0.561869	0.499687	0.49934	0.424877	0.376026	0.242203	0.187261	0.144837	0.128593	0.158185	0.298136	0.345537	0.256549	0.337985	0.32087	0.236484	0.258728	0.319743	0.301225	0.316438	0.27958	0.188309	0.235181	0.190188	0.0985319
2.55358	2.52864	2.53297	2.424	2.39274	2.39454	2.42916	2.33619	2.35698	2.39135	2.41255	2.27923	2.32321	2.298	2.11111	2.07621	2.05518	2.02413	1.95763	1.98737	1.9621	1.9284	1.79374	1.72776	1.68914	1.60122	1.57982	1.60871	1.62023	1.57577	1.57497	1.57545	1.58694	1.60276	1.68555	1.78747	1.7959	1.8721	1.8959	1.88365	1.84838	1.92375	1.88963	1.8986	1.88963	1.91033	1.87871	1.88679	1.83244	1.84708
0.0163506	-0.0130589	-0.028041	-0.0537148	-0.12048	-0.118004	-0.120744	-0.204516	-0.288512	-0.258924	-0.348093	-0.368528	-0.269138	-0.273561	-0.277791	-0.230786	-0.291839	-0.354572	-0.280387	-0.336986	-0.365182	-0.284974	-0.252931	-0.352395	-0.422602	-0.531301	-0.563506	-0.617377	-0.505497	-0.349305	-0.234376	-0.252886	-0.33637	-0.457473	-0.452936	-0.56837	-0.526874	-0.360933	-0.348758	-0.381627	-0.273078	-0.393971	-0.479947	-0.502159	-0.528877	-0.535123	-0.494358	-0.501193	-0.37975	-0.36515
-0.0975252	-0.0244612	-0.0667116	-0.0242105	-0.0514683	-0.126714	-0.31157	-0.291395	-0.236555	-0.210543	-0.233546	-0.116092	-0.0993307	-0.144079	-0.215813	-0.205443	-0.230862	-0.27782	-0.301809	-0.286942	-0.261742	-0.23956	-0.175582	-0.137931	-0.137766	-0.218527	-0.191453	-0.245344	-0.343267	-0.362194	-0.262839	-0.300986	-0.373949	-0.345701	-0.25883	-0.219737	-0.215411	-0.167244	-0.121479	-0.217294	-0.262128	-0.306082	-0.403959	-0.439631	-0.491351	-0.463464	-0.40248	-0.314031	-0.269079	-0.150507
control
0.881132	0.922641	0.936619	0.987607	0.999712	1.09798	1.08229	1.19424	1.38248	1.43955	1.51273	1.64625	1.60801	1.48777	1.45275	1.39894	1.36409	1.45213	1.49272	1.51055	1.54088	1.64739	1.61758	1.70493	1.85617	1.84894	1.67277	1.77177	1.67846	1.62282	1.71058	1.92416	1.85496	1.96339	2.01245	2.02513	1.96865	2.01532	2.01955	2.01025	2.06188	2.03841	1.99701	1.8592	1.76628	1.65487	1.69182	1.67257	1.76406	1.73244
11.2037	11.0322	10.909	10.7041	10.4067	10.1741	10.0329	9.93106	9.8107	9.70824	9.51523	9.36871	9.26792	9.11313	9.03394	9.04134	9.01368	9.02674	9.10704	9.20106	9.18585	9.20574	9.0267	8.89322	8.75158	8.79501	8.7437	8.83899	8.88485	8.95535	8.92611	8.91558	8.82775	8.80112	8.77731	8.81103	8.75785	8.75937	8.67298	8.60995	8.47889	8.52374	8.44544	8.48465	8.53594	8.58045	8.57977	8.53858	8.54967	8.49242
1.58169	1.61888	1.66292	1.69428	1.7717	1.81053	1.85088	1.84896	1.92849	1.95801	2.03373	2.08471	2.15652	2.18127	2.20974	2.18822	2.18615	2.20459	2.17823	2.16964	2.16196	2.13057	2.12027	2.15013	2.13211	2.16916	2.23205	2.21718	2.18199	2.20824	2.19379	2.1667	2.16899	2.15956	2.11599	2.07904	2.0292	2.00715	1.96444	1.96185	1.95882	1.91707	1.88815	1.89509	1.82869	1.78534	1.82876	1.80095	1.80021	1.82835
3.19583	3.10803	3.0025	2.86701	2.77115	2.70804	2.63317	2.64294	2.4576	2.44028	2.44532	2.35488	2.32034	2.38311	2.3012	2.24529	2.28924	2.18782	2.2769	2.29411	2.3246	2.34797	2.40632	2.37487	2.3478	2.30085	2.32197	2.34959	2.30675	2.33694	2.39819	2.3344	2.31659	2.37633	2.34438	2.32837	2.38484	2.45259	2.34651	2.38354	2.37881	2.40313	2.2921	2.362	2.33749	2.36008	2.37571	2.36533	2.37308	2.40783
0.266168	0.208114	0.0975815	-0.0303936	-0.173185	-0.199381	-0.216286	-0.170987	-0.0818053	0.0223679	0.00787717	-0.00143786	0.0280915	-0.00602013	-0.0279051	-0.0588139	-0.051164	-0.135399	-0.119724	-0.151788	-0.161919	-0.190183	-0.1469	-0.249717	-0.287148	-0.355443	-0.470986	-0.503222	-0.504172	-0.549221	-0.678438	-0.573937	-0.545343	-0.519602	-0.491846	-0.336742	-0.443523	-0.424684	-0.330306	-0.314506	-0.328137	-0.338924	-0.410882	-0.590182	-0.62082	-0.625142	-0.521034	-0.51479	-0.432695	-0.45335
1.02126	1.05868	0.934026	0.804814	0.780947	0.723334	0.643122	0.687267	0.677103	0.574607	0.633065	0.58507	0.574588	0.596532	0.695956	0.630254	0.715693	0.794774	0.863899	0.879688	0.97531	0.970287	0.889408	0.787131	0.714444	0.58738	0.560461	0.42971	0.452981	0.307723	0.251728	0.187569	0.13446	0.00835458	-0.0255276	0.0116185	-0.138249	-0.113274	-0.0675795	0.00508064	-0.0856227	-0.087242	-0.0350416	-0.0451095	-0.103019	-0.0198097	0.0705458	0.0388962	-0.0951032	-0.0565744
[truncated: 4,750 more columns]

## Sheet: Figure 4g
each row is a mouse, each value represents DF/F [%] starting at t=0 in column A
PAClight1P78A-ctrl DeltaF/F[%] responses to PACAP infusion
4.72066	4.60575	4.08958	4.32772	1.78591	0.363597	-0.843284	-2.81656	-3.83181	-1.33287	0.267518	1.2692	0.240346	-1.57024	-1.34247	-1.3115	-1.03813	-2.14299	-2.68579	-1.51501	-0.442615	-0.706629	2.52807	4.33056	4.97337	4.9028	4.9602	1.58217	0.549085	-0.127748	0.179365	-2.55685	-2.51027	-2.93653	-4.81052	-6.36828	-6.86955	-6.9137	-7.2176	-7.14284	-6.7557	-9.3079	-9.35008	-9.46092	-9.79365	-10.3232	-10.4458	-10.1039	-9.73608	-9.39488
4.80914	3.48078	2.81573	3.1786	1.9092	1.44491	1.59465	1.43911	-0.941138	-1.28266	-1.7586	-2.40836	-0.968201	-0.752732	-1.32887	-1.62782	-1.64223	-2.23625	-2.47905	-3.78658	-1.97642	-3.00098	-2.74066	-2.52721	-3.09621	-2.86298	-2.01122	-3.99242	-5.27386	-5.36397	-7.04461	-6.59668	-6.91538	-6.26613	-5.59093	-5.30133	-6.27871	-5.73923	-5.18368	-4.118	-4.01711	-3.07235	-4.2284	-5.06235	-4.80646	-4.98772	-4.58645	-4.87998	-5.30329	-5.08325
1.20556	-0.25638	-0.38813	-1.83384	-0.867906	-0.0742172	0.122322	-0.494132	-1.95378	-2.10699	-0.925009	0.721463	1.64682	2.88159	2.11417	1.20495	0.355589	1.25798	-0.135917	-0.321263	1.91899	0.827377	-0.561149	-0.950925	-1.96959	-2.10711	-1.27132	-1.47323	-1.61807	-1.64981	0.135817	2.90615	4.00934	5.53439	3.8357	5.19192	4.46669	2.06017	-0.268281	-2.93644	-5.82191	-5.81426	-4.78598	-4.03509	-4.45467	-3.93316	-3.44307	-3.08594	-3.02509	-3.11328
-0.713256	-0.410216	0.19322	0.694158	-0.671222	-0.69497	-0.438519	-0.515494	-1.28034	-0.512023	-0.648591	-1.16768	1.22015	1.86806	0.35173	0.888456	0.155859	-0.305736	-0.181826	-1.03314	-1.84802	-0.476618	-1.33694	-1.57537	-1.08105	-2.57513	-5.28509	-5.83823	-7.23099	-8.50942	-9.27725	-10.0911	-10.4321	-11.2989	-11.4493	-7.95667	-7.77927	-7.04188	-9.04701	-8.53251	-8.04205	-8.05464	-8.466	-8.8084	-8.86662	-8.30951	-9.21173	-9.05811	-9.19193	-9.07688
PAClight1P78A DeltaF/F[%] responses to PACAP infusion
-5.24096	-4.87751	-3.71224	-2.92942	-2.54074	-1.37442	-1.34627	-0.669781	-0.157669	0.915549	1.38119	1.92725	1.98785	1.68753	1.87754	2.48988	2.81292	3.17922	3.54431	4.33632	4.35687	4.57121	3.9936	2.97609	2.28223	1.03757	1.46441	-1.67869	-3.29231	-5.58422	-6.66156	-7.90928	-8.55777	-10.1127	-10.5399	-10.4911	-10.1529	-10.0078	-9.46809	-9.2019	-8.67874	-8.47364	-7.83885	-6.93806	-5.27999	-4.43435	-3.02316	-1.26419	-0.0195068	0.429492
5.06718	5.05517	3.36773	2.97597	3.00639	1.50936	0.461711	-0.582119	-1.48521	-1.56674	-0.883668	-0.500726	-1.12841	-2.23833	-2.37905	-1.28927	-1.90588	-2.12792	-1.76083	-1.91209	-1.43903	-1.80813	-0.323248	0.172418	0.642722	4.02795	8.09372	12.5344	17.765	21.6572	24.6911	28.1423	30.8323	33.363	38.4602	39.7247	42.5686	48.0351	54.1621	57.4363	61.8284	65.1583	68.1693	71.1751	74.0492	76.7262	77.6044	80.3246	83.9457	84.9496
-8.29396	-7.01728	-7.77781	-5.64294	-6.24244	-6.43784	-5.66859	-3.71625	-3.14185	-5.41813	-4.88723	-0.612206	0.823837	2.63622	8.93383	8.65413	10.5113	12.137	15.9006	14.5303	17.965	21.4105	21.7267	21.702	25.7599	27.9163	29.2415	31.2956	32.0754	36.0011	36.6792	32.3667	34.4774	36.2418	37.6618	37.6946	37.2611	35.2895	35.1994	35.343	39.4098	35.9145	38.6435	42.8302	43.957	42.7289	48.4028	47.0273	49.4468	49.1392
0.134134	0.968465	2.18096	1.5002	0.614557	-0.41386	-1.09697	1.55409	2.12028	1.54115	-2.24356	-3.67894	-1.14093	1.06066	0.294185	1.49488	0.0527457	-3.23807	-1.7391	-1.87587	-1.50072	-0.950008	-1.22546	-1.23143	0.866345	2.87979	0.280619	-0.800308	-0.845847	0.140348	3.23928	5.29734	6.66993	7.71382	8.56589	8.36113	9.13533	7.88077	5.79729	6.24968	6.94556	9.29528	8.86037	8.15682	9.07072	9.3596	10.3979	10.665	11.1261	11.384
-4.14488	-3.79021	-4.03525	-2.16391	-1.87403	-0.929581	-1.10864	-0.326445	0.40352	1.62667	1.96449	2.15321	1.91121	0.820908	0.823174	0.830144	1.39377	1.63906	1.88452	2.26917	3.93949	14.1185	25.6371	75.0377	99.5459	110.02	125.799	140.364	154.304	171.024	185.952	197.385	203.251	204.898	192.385	206.346	202.765	203.563	204.87	205.469	217.236	212.792	218.756	221.425	222.27	228.169	231.538	237.397	244.778	252.271
[truncated: 381 more columns]
