# Supplementary material for: Probing PAC1 receptor activation across species with an engineered sensor
Source: eLife. 2024 Aug 15;13:RP96496. doi: 10.7554/eLife.96496 (PMC11326774; doi:10.7554/eLife.96496)
Supplement: Figure 5—source data 1. [file elife-96496-fig5-data1.xlsx]

## Sheet: Figure E
Peak delF/F0
Sample	PACAP-38	Saline
1	26.9911	0.0224
2	1.4576	0.0497
3	0.6061	0.0146
4	0.6369	0.0206
5	5.2028	0.0141
Kolmogorov-Smirnov test
P value	0.0079
Exact or approximate P value?	Exact
P value summary	**
Significantly different (P < 0.05)?	Yes
Kolmogorov-Smirnov D	1
Area Under Curve
Sample	PACAP-38	Saline
1	22116	2.3131
2	598.35	0
3	409.98	0
4	479.73	2.724
5	2736.5	5.2526
Kolmogorov-Smirnov test
P value	0.0079
Exact or approximate P value?	Exact
P value summary	**
Significantly different (P < 0.05)?	Yes
Kolmogorov-Smirnov D	1

## Sheet: Figure D
Panel D',D" Representative sample- single larvae
ΔF/F0
Time(sec)	Cell						Average	Deviation	SEM
-280	0.00136472	-0.017111	-0.367182	0.0291789	0.269628	-0.0453228	-0.0215741	0.203926	0.0911985
-210	-0.150461	-0.19817	0.181015	0.0732866	-0.0657245	0.0158905	-0.024027	0.142236	0.0636099
-140	0.276015	-0.00915241	0.491906	0.120787	0.0643786	-0.0145912	0.15489	0.196591	0.0879182
-70	0.0337769	0.116196	-0.0342163	0.0337028	-0.0354419	0.0143914	0.0214014	0.0559716	0.0250312
0	-0.160696	0.108237	-0.271523	-0.256955	-0.23284	0.0296322	-0.130691	0.161184	0.0720836
70	19.4265	30.6912	14.3109	17.3499	6.43046	4.97342	15.5304	9.42429	4.21467
140	19.7387	33.9403	16.8109	18.3033	6.51346	5.06461	16.7285	10.4708	4.68268
210	20.595	37.3187	22.7013	22.264	6.87797	5.18579	19.1571	11.833	5.29188
280	21.4173	40.3987	22.5173	19.8516	7.53185	5.14806	19.4775	12.6402	5.65286
350	21.7056	41.9089	23.2531	20.9634	7.79991	5.29647	20.1546	13.1096	5.8628
420	21.5179	43.3971	24.8572	28.5114	7.89076	5.26099	21.9059	14.0559	6.286
490	22.8315	45.6136	28.358	25.7779	8.25639	5.38717	22.7041	14.6621	6.5571
560	23.0413	45.7847	28.3286	26.3128	8.43585	5.47412	22.8962	14.6814	6.56573
630	24.0136	46.9308	32.2634	29.7815	8.7611	5.59679	24.5579	15.4697	6.91828
700	24.8069	47.5933	32.1034	29.8991	8.89345	5.75095	24.8412	15.5869	6.97065
770	26.3217	47.5257	32.7509	28.3327	9.31404	5.94583	25.0318	15.4236	6.89765
840	26.9393	50.5758	31.5294	27.3284	9.67295	5.94583	25.332	16.1447	7.22013
910	28.1539	50.727	34.2962	25.6286	9.78959	6.13572	25.7885	16.3837	7.32701
980	28.5855	51.495	34.8793	25.6252	9.8266	6.20118	26.1021	16.6684	7.45432
1050	30.7485	51.6224	35.9518	27.6168	9.6135	6.39331	26.9911	16.8982	7.55712
Please note that time point 0s starts approximately 120s after ICV injection

## Sheet: S1
Fluorescence traces(Background Corrected)									ΔF/F0
Time(Frame)	Cell								Cell
1	0.587	0.494	0.344	0.91	1.132	3.821	0.551		0.0014	-0.0171	-0.3672	0.0292	0.2696	-0.0453	0.0288
2	0.498	0.403	0.642	0.949	0.833	4.066	0.517		-0.1505	-0.1982	0.181	0.0733	-0.0657	0.0159	-0.0347
3	0.748	0.498	0.811	0.991	0.949	3.944	0.612		0.276	-0.0092	0.4919	0.1208	0.0644	-0.0146	0.1426
4	0.606	0.561	0.525	0.914	0.86	4.06	0.632		0.0338	0.1162	-0.0342	0.0337	-0.0354	0.0144	0.18
5	0.492	0.557	0.396	0.657	0.684	4.121	0.366		-0.1607	0.1082	-0.2715	-0.257	-0.2328	0.0296	-0.3167
6	11.974	15.928	8.323	16.225	6.625	23.908	3.614		19.4265	30.6912	14.3109	17.3499	6.4305	4.9734	5.7476
7	12.157	17.561	9.682	17.068	6.699	24.273	3.872		19.7387	33.9403	16.8109	18.3033	6.5135	5.0646	6.2293
8	12.659	19.259	12.884	20.57	7.024	24.758	4.62		20.595	37.3187	22.7013	22.264	6.878	5.1858	7.6258
9	13.141	20.807	12.784	18.437	7.607	24.607	5.976		21.4173	40.3987	22.5173	19.8516	7.5319	5.1481	10.1576
10	13.31	21.566	13.184	19.42	7.846	25.201	6.941		21.7056	41.9089	23.2531	20.9634	7.7999	5.2965	11.9593
11	13.2	22.314	14.056	26.094	7.927	25.059	6.943		21.5179	43.3971	24.8572	28.5114	7.8908	5.261	11.963
12	13.97	23.428	15.959	23.677	8.253	25.564	6.479		22.8315	45.6136	28.358	25.7779	8.2564	5.3872	11.0967
13	14.093	23.514	15.943	24.15	8.413	25.912	4.936		23.0413	45.7847	28.3286	26.3128	8.4358	5.4741	8.2158
14	14.663	24.09	18.082	27.217	8.703	26.403	4.521		24.0136	46.9308	32.2634	29.7815	8.7611	5.5968	7.441
15	15.128	24.423	17.995	27.321	8.821	27.02	4.471		24.8069	47.5933	32.1034	29.8991	8.8934	5.7509	7.3476
16	16.016	24.389	18.347	25.936	9.196	27.8	4.284		26.3217	47.5257	32.7509	28.3327	9.314	5.9458	6.9985
17	16.378	25.922	17.683	25.048	9.516	27.8	3.879		26.9393	50.5758	31.5294	27.3284	9.6729	5.9458	6.2423
18	17.09	25.998	19.187	23.545	9.62	28.56	0.573		28.1539	50.727	34.2962	25.6286	9.7896	6.1357	0.0698
19	17.343	26.384	19.504	23.542	9.653	28.822	0.302		28.5855	51.495	34.8793	25.6252	9.8266	6.2012	-0.4361
20	18.611	26.448	20.087	25.303	9.463	29.591	0.301		30.7485	51.6224	35.9518	27.6168	9.6135	6.3933	-0.438
F0	0.5862	0.5026	0.5436	0.8842	0.8916	4.0024	0.5356

## Sheet: S2
Fluorescence traces(Background Corrected)														ΔF/F0
Time(Frame)	Cell													Cell
1	5.186	3.733	3.178	4.512	4.11	2.897	6.975	2.285	2.449	2.776	4.174	3.357		-0.0294	0.1488	0.0318	0.3145	0.1328	0.2037	0.0597	0.0319	0.0416	0.233		0.0204
2	5.156	3.146	3.073	3.712	3.639	2.589	7.023	2.217	2.298	2.61	3.582	2.882		-0.035	-0.0319	-0.0023	0.0814	0.003	0.0757	0.067	0.0012	-0.0226	0.0581		-0.124
3	5.533	3.151	3.108	3.098	3.49	2.209	6.321	2.169	2.29	2.483	3.127	3.081		0.0355	-0.0303	0.0091	-0.0975	-0.0381	-0.0822	-0.0397	-0.0205	-0.026	-0.0763		-0.0635
4	5.489	3.073	2.968	2.968	3.455	2.104	6.217	2.23	2.322	2.503	3.08	3.55		0.0273	-0.0543	-0.0364	-0.1353	-0.0477	-0.1258	-0.0555	0.007	-0.0124	-0.0902		0.0791
5	5.352	3.145	3.073	2.873	3.447	2.235	6.374	2.171	2.397	2.531	2.963	3.579		0.0016	-0.0322	-0.0023	-0.163	-0.0499	-0.0714	-0.0316	-0.0196	0.0195	-0.1247		0.0879
6	9.056	13.462	11.157	10.994	9.487	5.334	12.168	3.922	3.947	4.604	9.306	10.903		0.6949	3.1427	2.6224	2.2028	1.6148	1.2162	0.8487	0.7711	0.6787	1.749		2.3142
7	8.934	12.475	10.984	9.382	9.113	5.06	11.588	3.718	3.916	4.549	8.799	10.542		0.672	2.8389	2.5662	1.7332	1.5117	1.1024	0.7606	0.679	0.6655	1.5993		2.2045
8	8.534	11.005	10.363	8.314	8.452	4.791	10.877	3.361	3.659	4.162	8.354	10.146		0.5972	2.3866	2.3646	1.4221	1.3295	0.9906	0.6525	0.5178	0.5562	1.4678		2.0841
9	8.24	9.521	9.923	7.988	8.105	4.265	10.895	3.198	3.606	3.832	7.604	9.596		0.5421	1.9299	2.2218	1.3271	1.2339	0.7721	0.6553	0.4442	0.5337	1.2462		1.9169
10	7.773	8.742	9.177	7.678	7.468	3.754	10.207	3.125	3.125	3.41	6.649	9.499		0.4547	1.6902	1.9795	1.2368	1.0583	0.5597	0.5507	0.4112	0.3291	0.9641		1.8874
11	8.087	6.988	7.98	6.941	7.202	3.416	10.162	2.826	2.885	3.085	6.297	10.035		0.5135	1.1504	1.5909	1.0221	0.985	0.4193	0.5439	0.2762	0.227	0.8602		2.0503
12	7.367	5.729	7.44	6.646	6.629	3.369	9.398	2.549	2.636	2.803	5.626	9.15		0.3788	0.763	1.4156	0.9361	0.8271	0.3998	0.4278	0.1511	0.1211	0.6619		1.7813
13	7.331	5.078	6.608	6.502	6.333	3.147	8.367	2.424	2.695	2.772	5.099	9.278		0.372	0.5627	1.1455	0.8942	0.7455	0.3075	0.2712	0.0947	0.1462	0.5063		1.8202
14	7.246	4.58	6.138	6.749	6.072	2.861	8.116	2.28	2.488	2.584	4.797	7.278		0.3561	0.4094	0.9929	0.9661	0.6736	0.1887	0.2331	0.0296	0.0582	0.4171		1.2123
15	6.813	4.004	5.297	6.773	5.756	2.803	7.707	2.409	2.417	2.28	4.315	7.491		0.2751	0.2322	0.7198	0.9731	0.5865	0.1646	0.1709	0.0879	0.028	0.2747		1.277
16	6.857	3.862	5.072	7.266	5.501	2.799	7.33	2.257	2.362	2.337	4.148	7.729		0.2833	0.1885	0.6468	1.1168	0.5162	0.163	0.1136	0.0192	0.0046	0.2253		1.3494
17	6.701	3.532	4.337	8.264	5.198	2.724	6.935	2.017	2.368	2.247	3.969	8.356		0.2541	0.0869	0.4081	1.4075	0.4327	0.1318	0.0536	-0.0891	0.0071	0.1725		1.54
18	6.613	3.74	3.984	8.146	5.014	2.625	6.622	2.011	2.307	2.292	3.781	7.945		0.2376	0.1509	0.2935	1.3731	0.382	0.0907	0.0061	-0.0919	-0.0188	0.1169		1.415
19	6.233	3.133	3.63	8.885	6.859	2.162	6.283	1.59	1.896	1.927	3.35	7.966		0.1665	-0.0359	0.1786	1.5884	0.8905	-0.1017	-0.0454	-0.282	-0.1936	-0.0104		1.4214
20	6.495	3.234	3.582	9.217	4.561	2.439	6.056	1.825	2.123	2.189	3.802	8.473		0.2156	-0.0048	0.163	1.6851	0.2571	0.0134	-0.0799	-0.1758	-0.0971	0.1231		1.5755
F0	5.3432	3.2496	3.08	3.4326	3.6282	2.4068	6.582	2.2144	2.3512	2.5806	3.3852	3.2898

## Sheet: S3
Fluorescence traces(Background Corrected)														ΔF/F0
Time(Frame)	Cell													Cell
1	11.152	6.414	23.424	6.15	1.407	2.834	6.47	6.566	6.769	7.465	4.292	5.195		-0.053	-0.2075	0.0977	-0.0849	-0.0718	-0.0701	-0.0349	-0.0329	-0.0164	-0.021	-0.0345	-0.0061
2	11.924	6.864	22.469	6.642	1.475	3.273	6.877	6.717	6.91	7.685	4.535	5.347		0.0125	-0.1519	0.053	-0.0117	-0.0269	0.0739	0.0258	-0.0107	0.004	0.0078	0.0202	0.023
3	11.92	6.963	21.252	6.916	1.527	3.07	6.84	6.905	6.862	7.718	4.46	5.18		0.0122	-0.1397	-0.004	0.0291	0.0074	0.0073	0.0203	0.017	-0.0029	0.0122	0.0033	-0.009
4	11.653	9.058	19.861	6.897	1.529	2.996	6.733	6.801	6.974	7.564	4.392	5.211		-0.0105	0.1192	-0.0692	0.0263	0.0087	-0.017	0.0043	0.0017	0.0133	-0.008	-0.012	-0.0031
5	12.234	11.168	19.685	6.997	1.641	3.066	6.601	6.959	6.896	7.694	4.548	5.202		0.0388	0.3799	-0.0775	0.0412	0.0826	0.006	-0.0154	0.0249	0.002	0.009	0.0231	-0.0048
6	15.436	12.936	29.797	9.428	3.157	4.406	8.344	8.097	7.436	8.165	5.33	7.161		0.3107	0.5983	0.3964	0.4029	1.0827	0.4456	0.2446	0.1926	0.0805	0.0708	0.199	0.37
7	15.997	14.116	30.488	10.133	3.149	4.632	8.372	8.447	8.001	8.597	5.572	7.155		0.3584	0.7441	0.4288	0.5078	1.0775	0.5198	0.2488	0.2441	0.1626	0.1274	0.2534	0.3689
8	16.422	14.003	26.054	10.674	3.183	4.505	8.316	8.399	7.841	8.516	5.547	6.904		0.3945	0.7302	0.221	0.5883	1.0999	0.4781	0.2404	0.237	0.1393	0.1168	0.2478	0.3208
9	16.397	13.737	24.104	9.83	3.073	3.843	7.632	7.967	7.394	8.017	5.209	6.412		0.3923	0.6973	0.1296	0.4627	1.0273	0.2609	0.1384	0.1734	0.0744	0.0514	0.1718	0.2267
10	16.298	12.617	28.726	9.786	3.221	3.743	7.558	7.913	7.485	8.06	5.119	6.216		0.3839	0.5589	0.3462	0.4562	1.125	0.2281	0.1274	0.1655	0.0876	0.057	0.1515	0.1892
11	16.198	10.581	21.089	9.241	3.332	3.51	7.43	7.538	7.113	8.301	5.188	6.05		0.3754	0.3074	-0.0117	0.3751	1.1982	0.1517	0.1083	0.1102	0.0335	0.0886	0.167	0.1575
12	16.085	9.426	24.188	8.869	3.507	3.502	7.46	7.468	6.99	8.045	4.828	5.97		0.3658	0.1647	0.1336	0.3197	1.3136	0.149	0.1127	0.0999	0.0157	0.0551	0.0861	0.1421
13	15.797	8.745	22.212	8.494	3.433	3.402	7.353	7.463	7.091	8.043	4.595	5.684		0.3414	0.0805	0.041	0.2639	1.2648	0.1162	0.0968	0.0992	0.0303	0.0548	0.0337	0.0874
14	15.425	8.038	23.512	8.497	3.277	3.253	7.302	7.197	6.815	7.795	4.691	5.653		0.3098	-0.0068	0.1019	0.2644	1.1619	0.0673	0.0892	0.06	-0.0098	0.0223	0.0552	0.0815
15	15.026	8.118	25.985	8.841	3.254	3.222	7.512	7.02	6.876	7.752	4.691	5.533		0.2759	0.003	0.2178	0.3155	1.1467	0.0572	0.1205	0.0339	-0.00090087	0.0166	0.0552	0.0585
16	14.275	8.137	29.907	8.277	3.202	3.356	7.038	7.264	6.884	7.823	4.48	5.688		0.2121	0.0054	0.4016	0.2316	1.1124	0.1011	0.0498	0.0699	0.00026154	0.0259	0.0078	0.0882
17	13.437	8.128	27.625	8.362	3.662	3.25	7.079	7.13	6.846	7.73	4.494	5.52		0.141	0.0043	0.2946	0.2443	1.4159	0.0663	0.0559	0.0501	-0.0053	0.0137	0.0109	0.0561
18	12.599	8.463	23.728	8.526	3.525	3.241	7.083	6.988	6.975	7.499	4.438	5.446		0.0698	0.0457	0.112	0.2687	1.3255	0.0634	0.0565	0.0292	0.0135	-0.0166	-0.0017	0.0419
19	11.789	8.474	25.74	8.544	3.887	3.351	7.066	7.034	6.826	7.573	4.368	5.37		0.0011	0.047	0.2063	0.2714	1.5643	0.0995	0.054	0.036	-0.0082	-0.0068	-0.0174	0.0274
20	11.226	10.63	25.232	8.705	3.743	3.229	7.048	7.023	7.155	7.653	4.726	5.417		-0.0468	0.3134	0.1825	0.2953	1.4693	0.0595	0.0513	0.0344	0.0396	0.0036	0.0631	0.0363
F0	11.7766	8.0934	21.3382	6.7204	1.5158	3.0478	6.7042	6.7896	6.8822	7.6252	4.4454	5.227

## Sheet: S4
Fluorescence traces(Background Corrected)													ΔF/F0
Time(Frame)	Cell												Cell
1	1.723	2.31	3.011	3.072	3.095	4.121	5.331	5.945	4.011	2.977	2.481		0.0346	-0.0602	0.0266	0.0467	0.0584	0.0139	0.0939	-0.0265	0.007	0.0303	0.044
2	1.655	2.413	2.966	2.946	2.885	3.847	4.75	5.742	3.909	2.877	2.414		-0.0062	-0.0183	0.0113	0.0037	-0.0134	-0.0535	-0.0253	-0.0598	-0.0186	-0.0043	0.0158
3	1.622	2.629	2.876	2.945	2.843	4.056	4.611	6.093	4.151	2.769	2.319		-0.0261	0.0696	-0.0194	0.0034	-0.0278	-0.0021	-0.0538	-0.0023	0.0422	-0.0417	-0.0242
4	1.709	2.501	2.935	2.815	2.854	4.127	4.727	6.268	3.921	2.889	2.373		0.0262	0.0175	0.0006819	-0.0409	-0.024	0.0154	-0.03	0.0264	-0.0156	-0.00013844	-0.0014
5	1.618	2.437	2.877	2.897	2.944	4.171	4.948	6.487	3.923	2.935	2.295		-0.0285	-0.0085	-0.0191	-0.0129	0.0068	0.0262	0.0153	0.0622	-0.0151	0.0158	-0.0343
6	2.826	2.702	3.82	4.296	4.201	5.107	5.609	6.012	2.989	3.853	3.342		0.6969	0.0993	0.3024	0.4637	0.4366	0.2565	0.1509	-0.0156	-0.2496	0.3335	0.4063
7	2.809	7.924	3.31	4.196	4.14	4.99	5.67	5.776	2.865	3.863	3.28		0.6867	2.2238	0.1285	0.4296	0.4158	0.2277	0.1635	-0.0542	-0.2807	0.337	0.3802
8	2.814	3.61	3.43	4.122	4.124	4.938	5.587	5.819	3.012	3.81	3.272		0.6897	0.4687	0.1695	0.4044	0.4103	0.2149	0.1464	-0.0472	-0.2438	0.3186	0.3769
9	2.754	4.462	3.377	4.182	4.077	4.935	5.694	5.875	2.995	3.819	3.44		0.6537	0.8153	0.1514	0.4249	0.3942	0.2142	0.1684	-0.038	-0.2481	0.3217	0.4476
10	2.731	7.373	3.338	4.18	4.048	4.856	5.573	5.841	3.013	3.839	3.359		0.6398	1.9996	0.1381	0.4242	0.3843	0.1948	0.1436	-0.0436	-0.2435	0.3286	0.4135
11	2.701	10.155	3.414	4.231	3.967	4.832	5.95	5.807	3.095	3.609	3.226		0.6218	3.1314	0.164	0.4416	0.3566	0.1889	0.2209	-0.0491	-0.2229	0.249	0.3575
12	2.674	7	3.339	4.145	3.905	4.875	5.709	5.824	3.14	3.674	3.206		0.6056	1.8478	0.1384	0.4123	0.3354	0.1994	0.1715	-0.0463	-0.2116	0.2715	0.3491
13	2.665	6.791	3.289	4.133	4.152	5.02	5.826	5.656	3.189	3.728	3.269		0.6002	1.7628	0.1214	0.4082	0.4199	0.2351	0.1955	-0.0738	-0.1993	0.2902	0.3756
14	2.71	6.978	3.526	4.126	3.936	4.929	6.061	5.857	3.175	3.753	3.426		0.6272	1.8389	0.2022	0.4058	0.346	0.2127	0.2437	-0.0409	-0.2029	0.2989	0.4417
15	2.68	6.606	3.262	4.094	3.977	4.943	5.784	5.611	3.176	3.699	3.314		0.6092	1.6876	0.1122	0.3949	0.36	0.2162	0.1869	-0.0812	-0.2026	0.2802	0.3945
16	2.7	6.86	3.306	4.148	4.131	4.906	5.747	6.139	3.118	3.861	3.323		0.6212	1.7909	0.1272	0.4133	0.4127	0.2071	0.1793	0.0052	-0.2172	0.3363	0.3983
17	2.654	7.028	3.441	4.046	4.303	4.952	5.845	5.801	3.082	3.831	3.505		0.5936	1.8592	0.1732	0.3785	0.4715	0.2184	0.1994	-0.0501	-0.2262	0.3259	0.4749
18	2.717	7.212	3.406	4.168	4.073	4.919	5.414	6.485	3.095	3.824	3.365		0.6314	1.9341	0.1613	0.4201	0.3929	0.2103	0.1109	0.0619	-0.2229	0.3235	0.416
19	2.705	6.73	3.4	4.304	4.1	4.907	5.543	6.025	3.284	3.714	3.363		0.6242	1.738	0.1592	0.4664	0.4021	0.2073	0.1374	-0.0134	-0.1755	0.2854	0.4152
20	2.654	6.468	3.337	4.102	4.406	4.848	5.242	6.006	3.253	3.579	3.437		0.5936	1.6314	0.1377	0.3976	0.5067	0.1928	0.0756	-0.0165	-0.1833	0.2387	0.4463
F0	1.6654	2.458	2.933	2.935	2.9242	4.0644	4.8734	6.107	3.983	2.8894	2.3764

## Sheet: S5
Fluorescence traces(Background Corrected)								ΔF/F0
Time(Frame)	Cell							Cell
1	2.672	4.473	5.12	2.041	2.593	4.185		-0.0937	0.1616	0.1906	0.0331	-0.0211	-0.1076
2	2.927	4.312	4.435	1.892	2.542	4.56		-0.0073	0.1198	0.0313	-0.0423	-0.0403	-0.0276
3	2.915	3.938	4.093	1.972	2.652	4.75		-0.0113	0.0227	-0.0482	-0.0018	0.0012	0.0129
4	3.121	3.488	3.93	1.94	2.731	4.904		0.0585	-0.0942	-0.0861	-0.018	0.031	0.0458
5	3.107	3.042	3.924	2.033	2.726	5.048		0.0538	-0.21	-0.0875	0.0291	0.0291	0.0765
6	4.409	3.994	11.208	7.699	11.84	5.532		0.4954	0.0372	1.6063	2.897	3.4699	0.1797
7	4.661	4.699	11.333	8.476	11.258	5.715		0.5809	0.2203	1.6353	3.2903	3.2502	0.2187
8	4.701	5.095	11.531	9.254	10.189	5.761		0.5944	0.3232	1.6814	3.6841	2.8466	0.2285
9	4.882	5.387	11.353	9.973	8.485	5.843		0.6558	0.399	1.64	4.0481	2.2033	0.246
10	5.008	5.614	11.783	11.398	7.018	5.927		0.6985	0.458	1.74	4.7694	1.6495	0.2639
11	5.067	5.803	14.031	13.168	5.971	5.988		0.7186	0.507	2.2627	5.6653	1.2542	0.2769
12	5.208	5.911	17.419	14.402	5.874	5.943		0.7664	0.5351	3.0506	6.2899	1.2176	0.2673
13	5.379	6.671	22.536	16.395	6.062	6.002		0.8244	0.7325	4.2404	7.2987	1.2886	0.2799
14	5.498	7.743	26.785	17.95	6.199	6.145		0.8647	1.0109	5.2285	8.0858	1.3403	0.3104
15	5.668	10.752	30.955	18.894	6.15	6.057		0.9224	1.7923	6.1982	8.5637	1.3218	0.2916
16	6.133	15.353	33.843	20.766	6.244	5.961		1.0801	2.9872	6.8697	9.5112	1.3573	0.2712
17	6.41	20.594	36.268	22.395	6.507	6.01		1.1741	4.3483	7.4336	10.3358	1.4566	0.2816
18	6.728	26.111	37.402	23.73	6.586	6.168		1.2819	5.781	7.6973	11.0115	1.4864	0.3153
19	7.072	30.934	36.694	24.595	6.557	6.122		1.3986	7.0336	7.5327	11.4494	1.4755	0.3055
20	7.628	34.251	38.661	25.454	6.775	6.109		1.5872	7.895	7.9901	11.8842	1.5578	0.3027
F0	2.9484	3.8506	4.3004	1.9756	2.6488	4.6894

## Sheet: Control1
Fluorescence traces(Background Corrected)								ΔF/F0
Time(Frame)	Cell							Cell
1	8.784	22.089	5.313	2.942	6.04	4.282		0.012	-0.0101	0.0117	0.0528	0.0039	-0.013
2	8.604	22.349	5.202	2.854	5.891	4.312		-0.0088	0.0015	-0.0094	0.0213	-0.0208	-0.0061
3	8.673	22.383	5.195	2.867	6.015	4.433		-0.00082947	0.003	-0.0107	0.026	-0.0002327	0.0218
4	8.764	22.642	5.32	2.597	6.153	4.33		0.0097	0.0146	0.0131	-0.0706	0.0227	-0.002
5	8.576	22.113	5.227	2.712	5.983	4.336		-0.012	-0.0091	-0.0046	-0.0295	-0.0056	-0.00059927
6	8.649	22.554	5.326	2.851	6.315	4.527		-0.0036	0.0107	0.0142	0.0203	0.0496	0.0434
7	8.545	22.354	5.4	2.753	6.083	4.314		-0.0156	0.0017	0.0283	-0.0148	0.0111	-0.0057
8	8.681	22.103	5.372	2.844	6.257	4.417		9.2164e-05	-0.0095	0.023	0.0177	0.04	0.0181
9	8.594	22.172	5.289	2.67	6.078	4.374		-0.0099	-0.0064	0.0072	-0.0445	0.0102	0.0082
10	8.612	22.635	5.317	2.677	6.189	4.378		-0.0079	0.0143	0.0125	-0.042	0.0287	0.0091
11	8.704	22.164	5.401	2.695	6.221	4.334		0.0027	-0.0068	0.0285	-0.0356	0.034	-0.0011
12	8.591	22.281	5.123	2.635	6.161	4.314		-0.0103	-0.0015	-0.0245	-0.057	0.024	-0.0057
13	8.639	21.392	5.276	2.757	6.045	4.247		-0.0047	-0.0414	0.0047	-0.0134	0.0048	-0.0211
14	8.547	21.466	5.194	2.601	6.153	4.067		-0.0153	-0.0381	-0.0109	-0.0692	0.0227	-0.0626
15	8.631	21.15	5.129	2.647	6.146	4.234		-0.0057	-0.0522	-0.0233	-0.0527	0.0215	-0.0241
16	8.495	21.577	5.065	2.643	6.22	4.158		-0.0213	-0.0331	-0.0355	-0.0542	0.0338	-0.0416
17	8.29	21.343	5.111	2.597	6.125	4.128		-0.045	-0.0436	-0.0267	-0.0706	0.0181	-0.0485
18	8.36	20.884	4.982	2.708	6.229	4.202		-0.0369	-0.0641	-0.0513	-0.0309	0.0353	-0.0315
19	8.315	20.786	5.058	2.691	6.166	3.997		-0.0421	-0.0685	-0.0368	-0.037	0.0249	-0.0787
20	8.354	21.462	5.093	2.542	6.139	4.163		-0.0376	-0.0382	-0.0302	-0.0903	0.0204	-0.0405
F0	8.6802	22.3152	5.2514	2.7944	6.0164	4.3386

## Sheet: Control2
Fluorescence traces(Background Corrected)								ΔF/F0
Time(Frame)	Cell							Cell
1	5.324	6.752	3.835	6.153	3.866	3.871		-0.0165	0.0645	0.0907	-0.00087685	0.0967	0.0638
2	5.685	6.372	3.576	6.246	3.593	3.739		0.0502	0.0046	0.0171	0.0142	0.0193	0.0275
3	5.54	6.481	3.611	6.362	3.612	3.702		0.0234	0.0218	0.027	0.0331	0.0247	0.0173
4	5.765	6.682	3.529	6.486	3.612	3.72		0.065	0.0534	0.0037	0.0532	0.0247	0.0223
5	4.752	5.428	3.029	5.545	2.942	3.163		-0.1221	-0.1443	-0.1385	-0.0996	-0.1654	-0.1308
6	5.037	5.556	3.024	5.571	3.022	3.148		-0.0695	-0.1241	-0.1399	-0.0954	-0.1427	-0.1349
7	4.908	5.472	2.967	5.514	3.116	3.297		-0.0933	-0.1373	-0.1561	-0.1046	-0.116	-0.094
8	4.831	5.097	3.014	5.748	3.045	3.016		-0.1076	-0.1964	-0.1428	-0.0666	-0.1362	-0.1712
9	4.756	5.004	2.939	5.31	2.737	2.941		-0.1214	-0.2111	-0.1641	-0.1378	-0.2235	-0.1918
10	4.403	4.679	2.584	4.966	2.602	2.723		-0.1866	-0.2623	-0.2651	-0.1936	-0.2618	-0.2517
11	4.451	4.339	2.582	4.666	2.687	2.398		-0.1778	-0.3159	-0.2656	-0.2423	-0.2377	-0.341
12	4.273	4.426	2.475	4.489	2.497	2.601		-0.2106	-0.3022	-0.2961	-0.2711	-0.2916	-0.2852
13	4.084	4.043	2.419	4.265	2.512	2.249		-0.2455	-0.3626	-0.312	-0.3074	-0.2874	-0.382
14	3.612	3.406	2.249	4.099	2.319	2.012		-0.3327	-0.463	-0.3604	-0.3344	-0.3421	-0.4471
15	5.773	2.36	1.715	4.245	1.702	2.048		0.0665	-0.6279	-0.5122	-0.3107	-0.5172	-0.4372
16	3.471	1.654	1.458	3.949	1.416	1.8		-0.3588	-0.7392	-0.5853	-0.3588	-0.5983	-0.5054
17	2.6	1.365	1.173	2.872	0.986	1.522		-0.5197	-0.7848	-0.6664	-0.5336	-0.7203	-0.5818
18	2.182	1.312	0.84	2.287	0.573	1.462		-0.5969	-0.7932	-0.7611	-0.6286	-0.8374	-0.5982
19	2.076	1.169	0.523	1.909	0.273	1.206		-0.6165	-0.8157	-0.8513	-0.69	-0.9226	-0.6686
20	2.076	1.169	0.523	1.909	0.273	1.206		-0.6165	-0.8157	-0.8513	-0.69	-0.9226	-0.6686
F0	5.4132	6.343	3.516	6.1584	3.525	3.639

## Sheet: Control3
Fluorescence traces(Background Corrected)								ΔF/F0
Time(Frame)	Cell							Cell
1	2.323	2.181	2.225	2.237	2.483	2.789		0.0242	0.0173	0.0234	-0.0079	-0.0088	0.0206
2	2.283	2.227	2.236	2.289	2.524	2.709		0.0065	0.0387	0.0284	0.0152	0.0076	-0.0086
3	2.283	2.128	2.139	2.301	2.592	2.716		0.0065	-0.0075	-0.0162	0.0205	0.0347	-0.0061
4	2.2	2.047	2.096	2.183	2.443	2.651		-0.0301	-0.0452	-0.036	-0.0318	-0.0248	-0.0299
5	2.252	2.137	2.175	2.264	2.483	2.798		-0.0071	-0.0033	0.00036795	0.0041	-0.0088	0.0239
6	2.252	2.129	2.127	2.196	2.53	2.642		-0.0071	-0.007	-0.0217	-0.0261	0.01	-0.0332
7	2.204	2.099	2.088	2.157	2.435	2.577		-0.0283	-0.021	-0.0396	-0.0434	-0.0279	-0.0569
8	2.193	2.046	2.046	2.179	2.37	2.773		-0.0332	-0.0457	-0.059	-0.0336	-0.0539	0.0148
9	2.118	2.05	2.079	2.056	2.253	2.644		-0.0662	-0.0438	-0.0438	-0.0882	-0.1006	-0.0324
10	2.208	2.082	2.05	2.208	2.4	2.622		-0.0265	-0.0289	-0.0571	-0.0208	-0.0419	-0.0405
11	2.339	2.12	2.056	2.203	2.344	2.615		0.0312	-0.0112	-0.0544	-0.023	-0.0643	-0.043
12	2.214	2.126	2.123	2.185	2.433	2.543		-0.0239	-0.0084	-0.0235	-0.031	-0.0287	-0.0694
13	2.196	2.133	2.078	2.157	2.428	2.675		-0.0318	-0.0051	-0.0442	-0.0434	-0.0307	-0.0211
14	2.236	2.07	2.109	2.162	2.401	2.579		-0.0142	-0.0345	-0.03	-0.0412	-0.0415	-0.0562
15	2.373	2.069	2.1	2.172	2.389	2.693		0.0462	-0.035	-0.0341	-0.0367	-0.0463	-0.0145
16	2.251	2.17	2.124	2.235	2.441	2.516		-0.0076	0.0121	-0.0231	-0.0088	-0.0255	-0.0793
17	2.189	2.121	2.068	2.241	2.353	2.779		-0.0349	-0.0107	-0.0488	-0.0061	-0.0607	0.017
18	2.197	2.059	2.111	2.137	2.272	2.68		-0.0314	-0.0396	-0.0291	-0.0522	-0.093	-0.0192
19	2.122	2.006	2.063	2.121	2.308	2.608		-0.0645	-0.0644	-0.0511	-0.0593	-0.0786	-0.0456
20	2.097	2.017	2.097	2.108	2.371	2.516		-0.0755	-0.0592	-0.0355	-0.0651	-0.0535	-0.0793
F0	2.2682	2.144	2.1742	2.2548	2.505	2.7326

[truncated: 2 more sheets: Control4, Control5]
